# Supplementary material for: Nazarov cyclization of divinyl ketones bearing an ester group at the β-position: a remarkable effect of α-substitution and alkene geometry on regioselectivity
Source: Royal Society of Chemistry journal article supplement (doi:10.1039/c6ob00081a), 2016-01-01

## 5. Copies of NMR spectra of new compounds

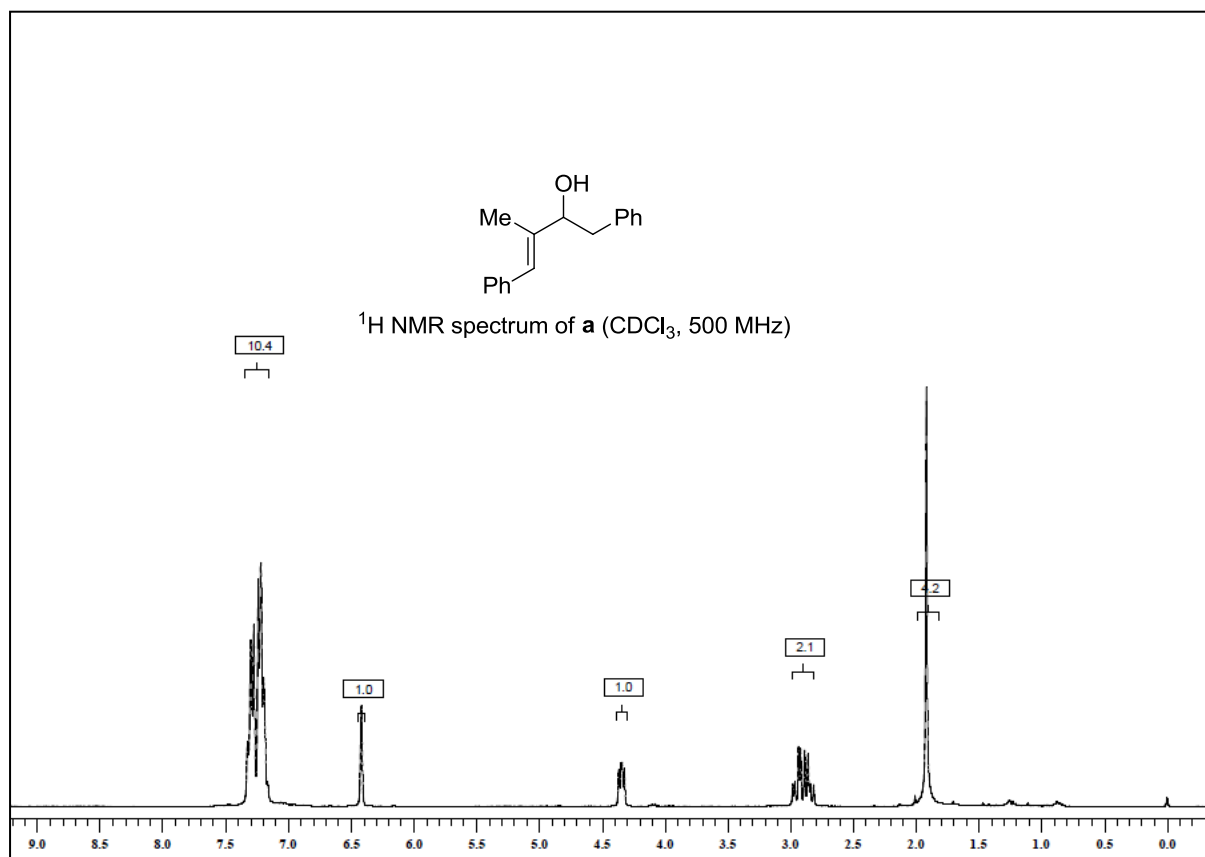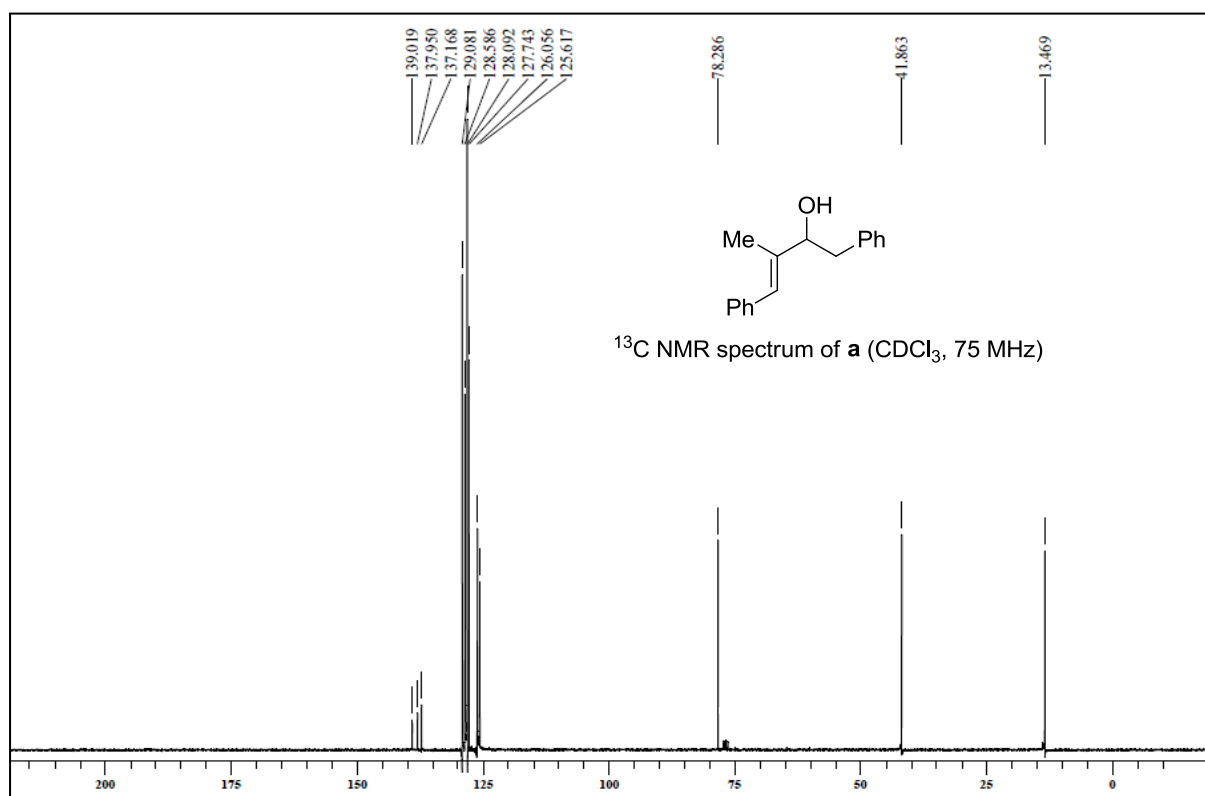

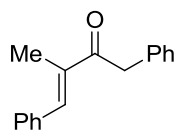

$^1\text{H}$  NMR spectrum of **4a** ( $\text{CDCl}_3$ , 300 MHz)

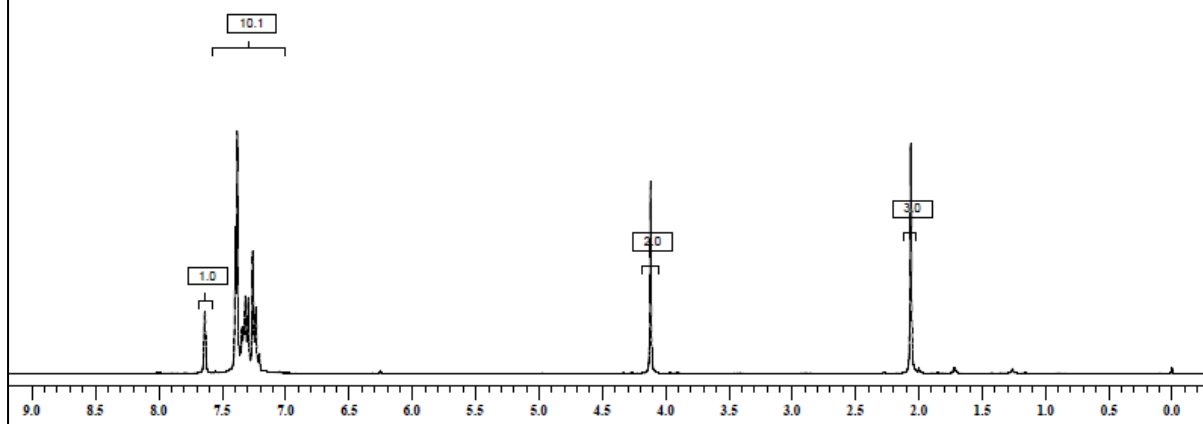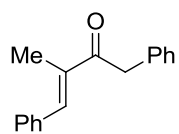

$^{13}\text{C}$  NMR spectrum of **4a** ( $\text{CDCl}_3$ , 75 MHz)

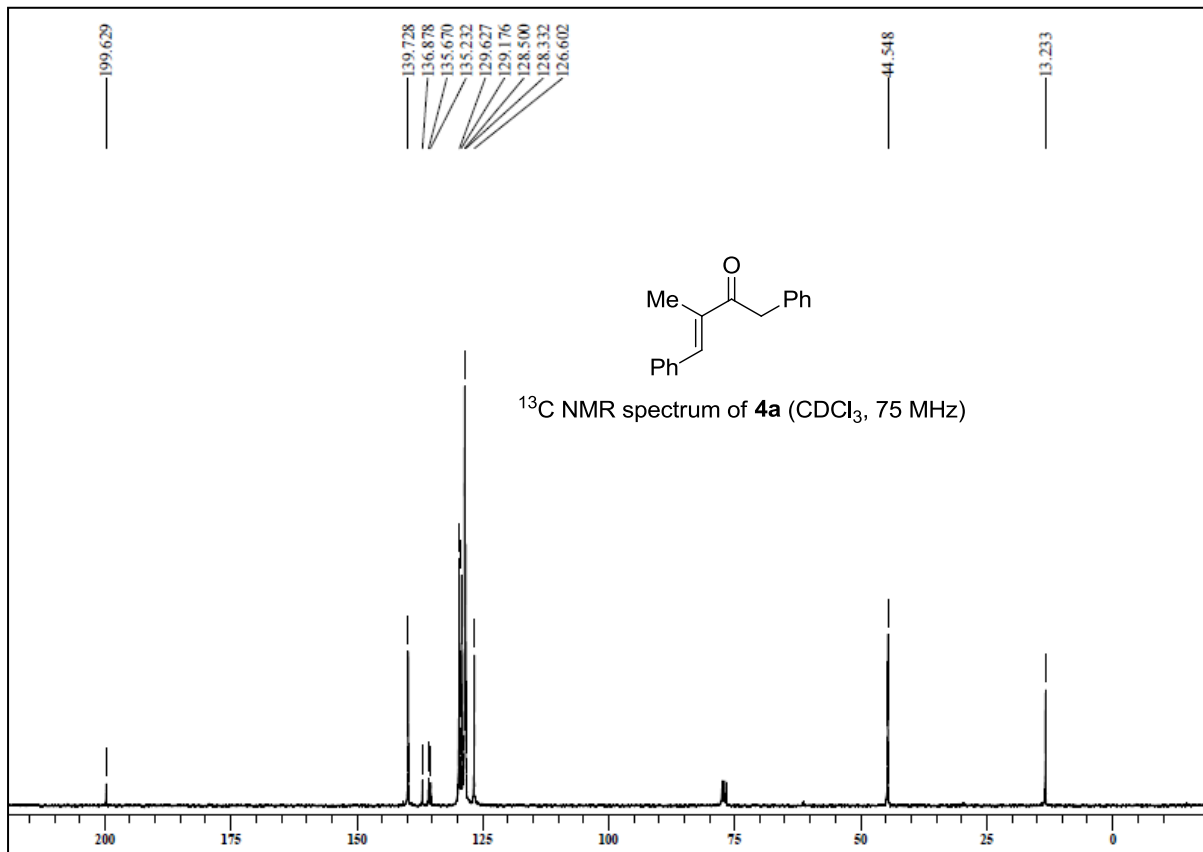

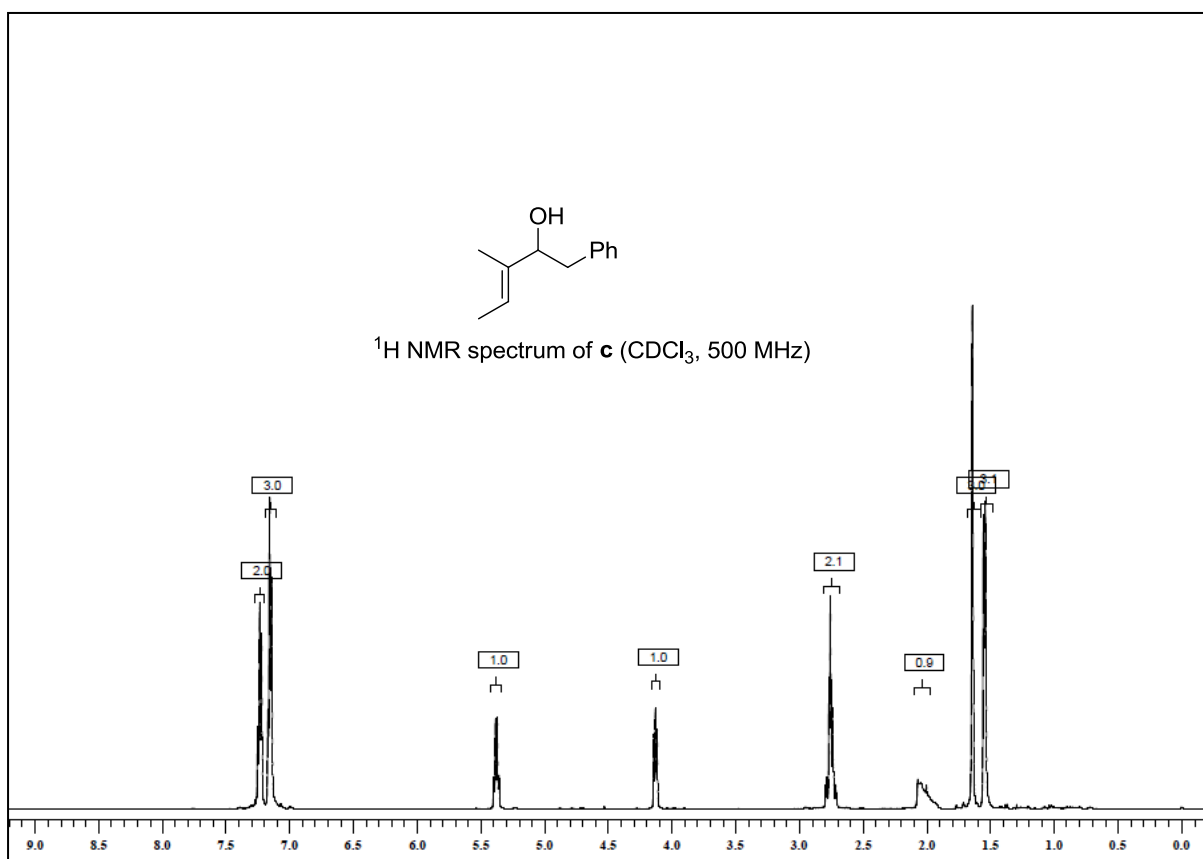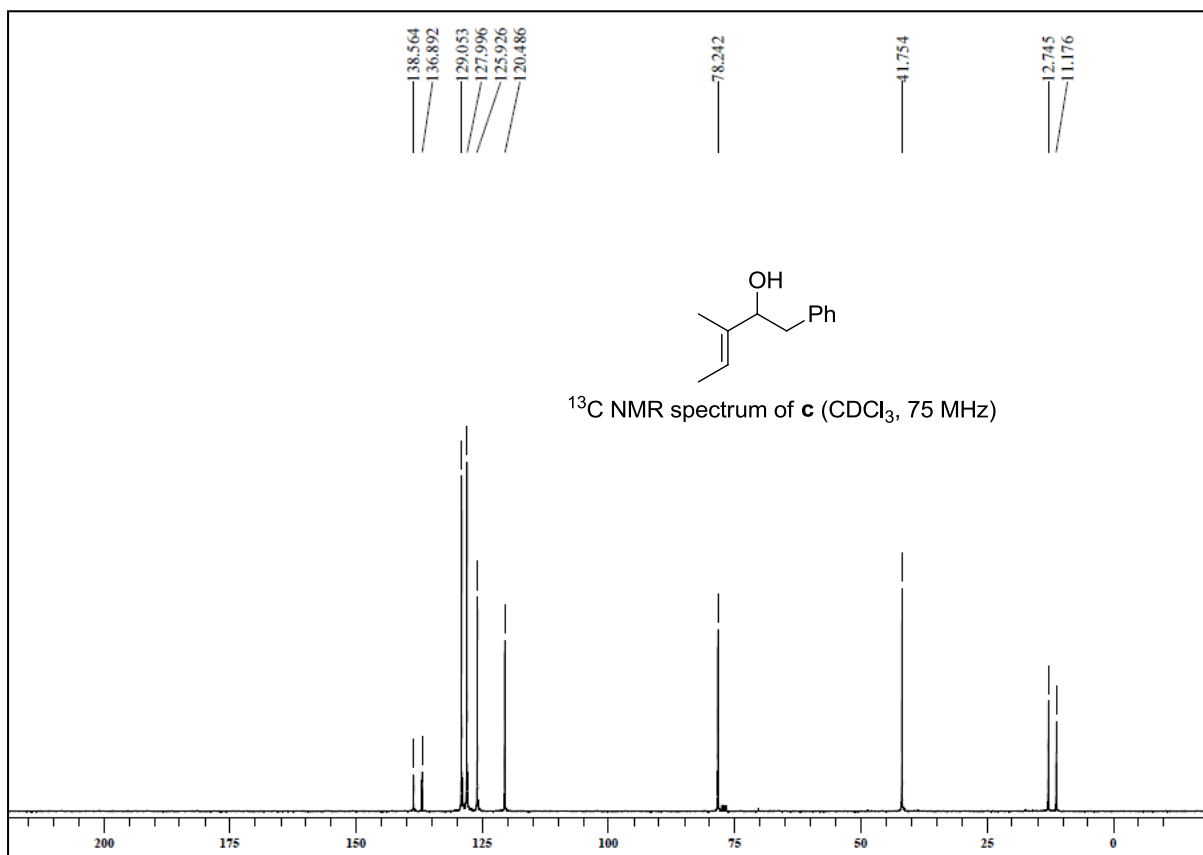

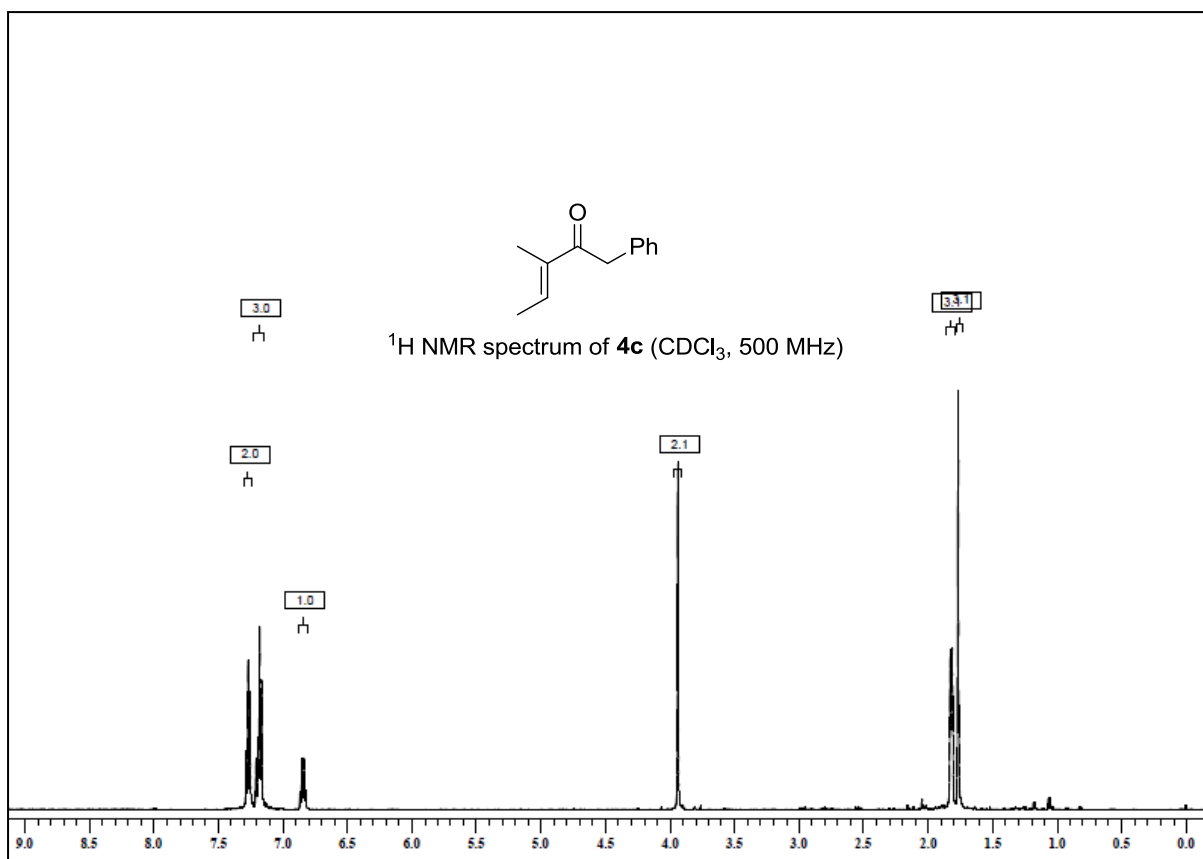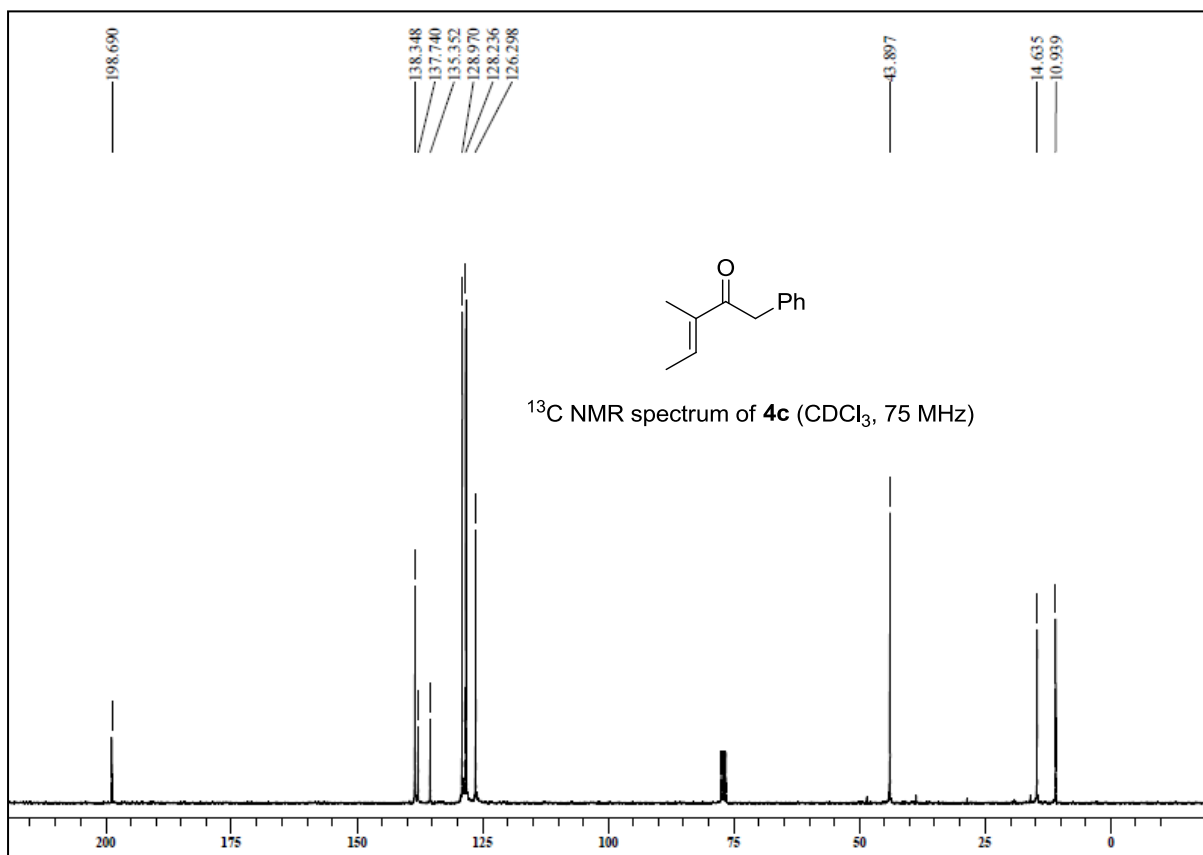

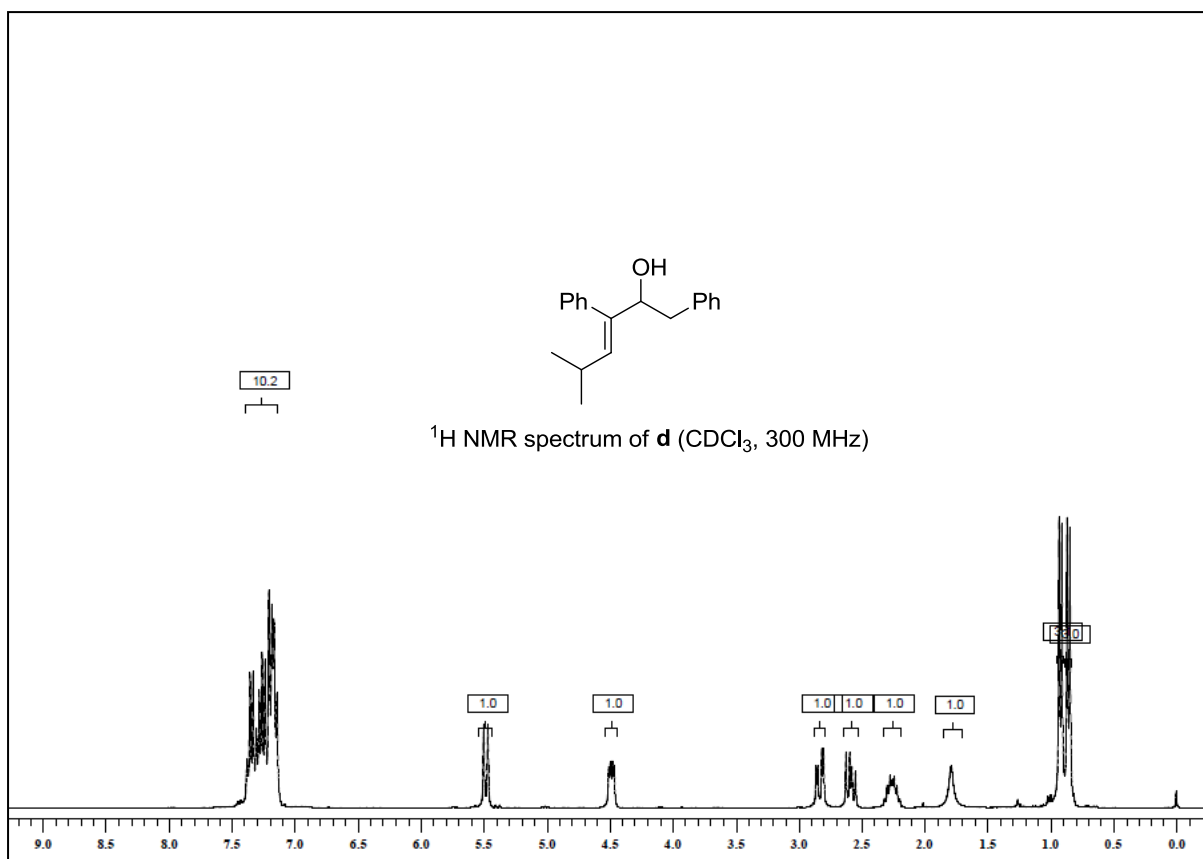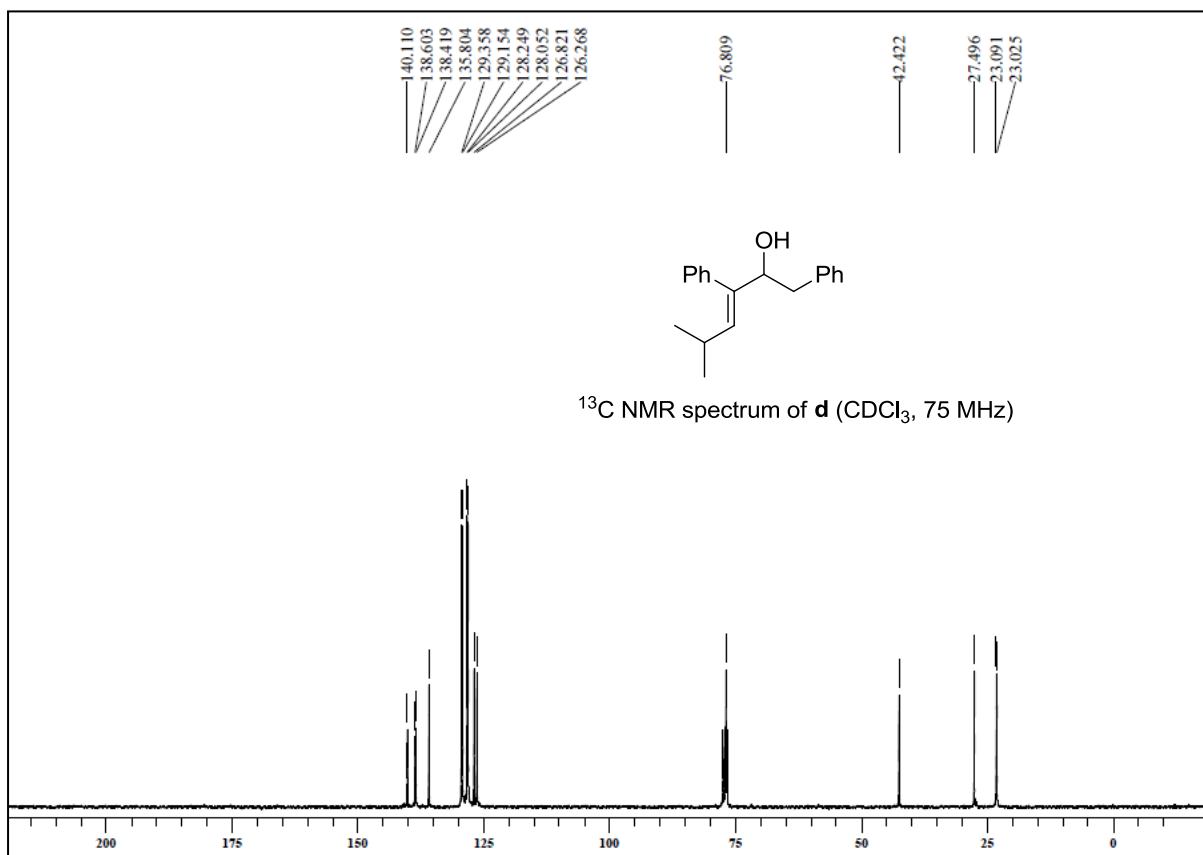

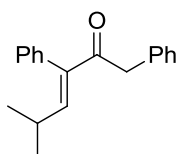

$^1\text{H}$  NMR spectrum of **4d** ( $\text{CDCl}_3$ , 300 MHz)

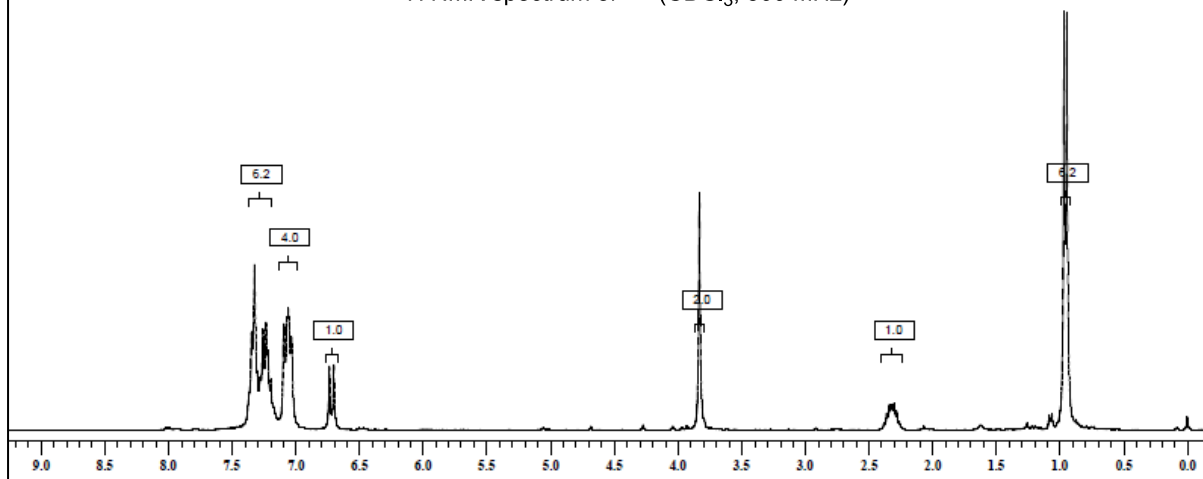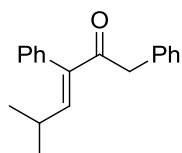

$^{13}\text{C}$  NMR spectrum of **4d** ( $\text{CDCl}_3$ , 125 MHz)

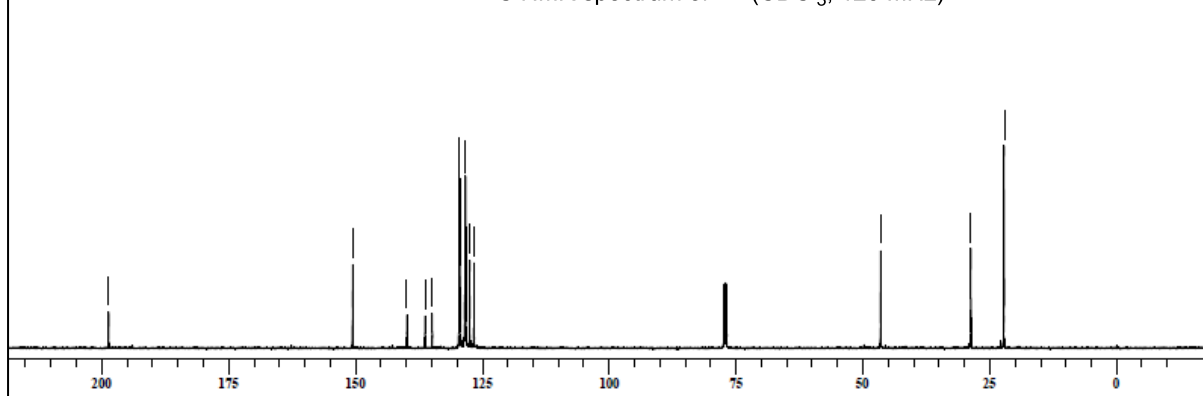

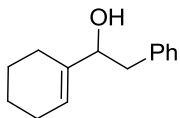

$^1\text{H}$  NMR spectrum of **g** ( $\text{CDCl}_3$ , 300 MHz)

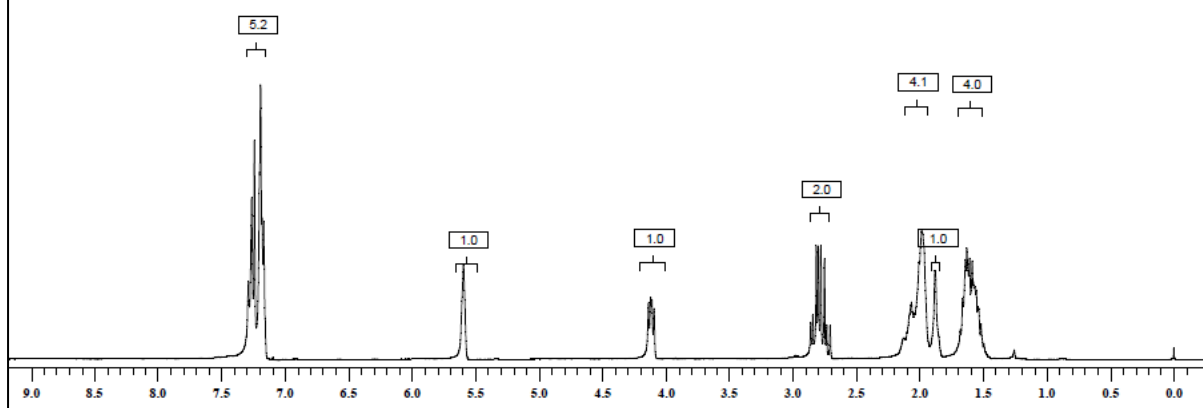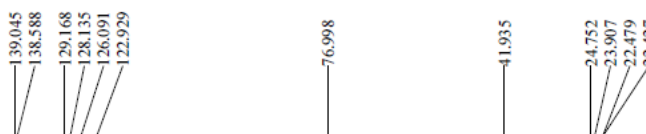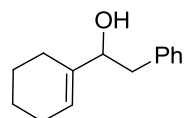

$^{13}\text{C}$  NMR spectrum of **g** ( $\text{CDCl}_3$ , 75 MHz)

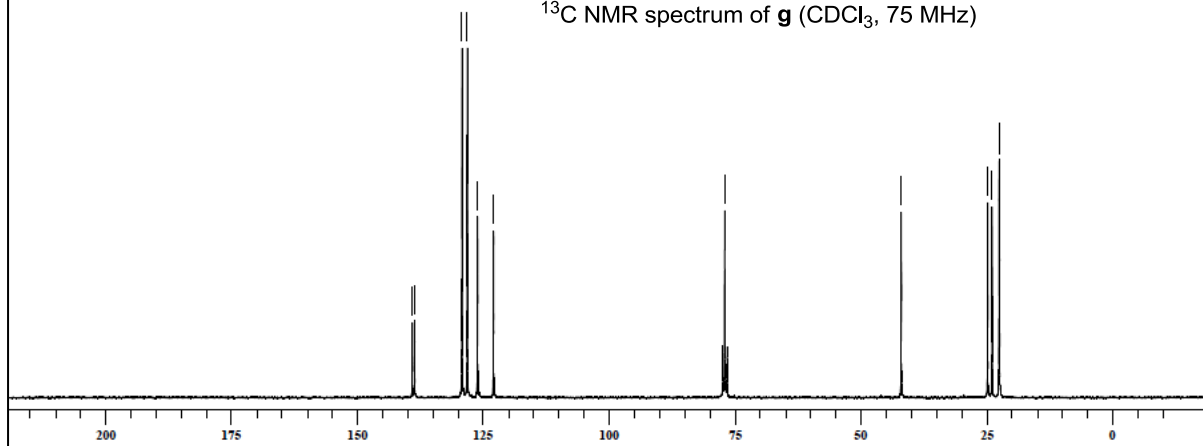

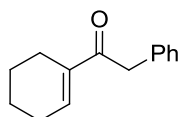

$^1\text{H}$  NMR spectrum of **4g** ( $\text{CDCl}_3$ , 300 MHz)

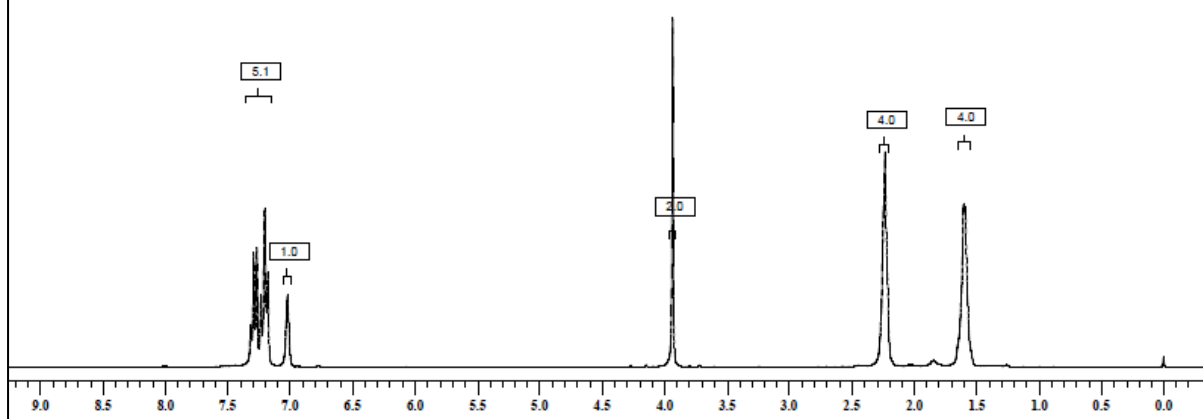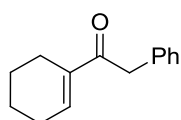

$^{13}\text{C}$  NMR spectrum of **4g** ( $\text{CDCl}_3$ , 75 MHz)

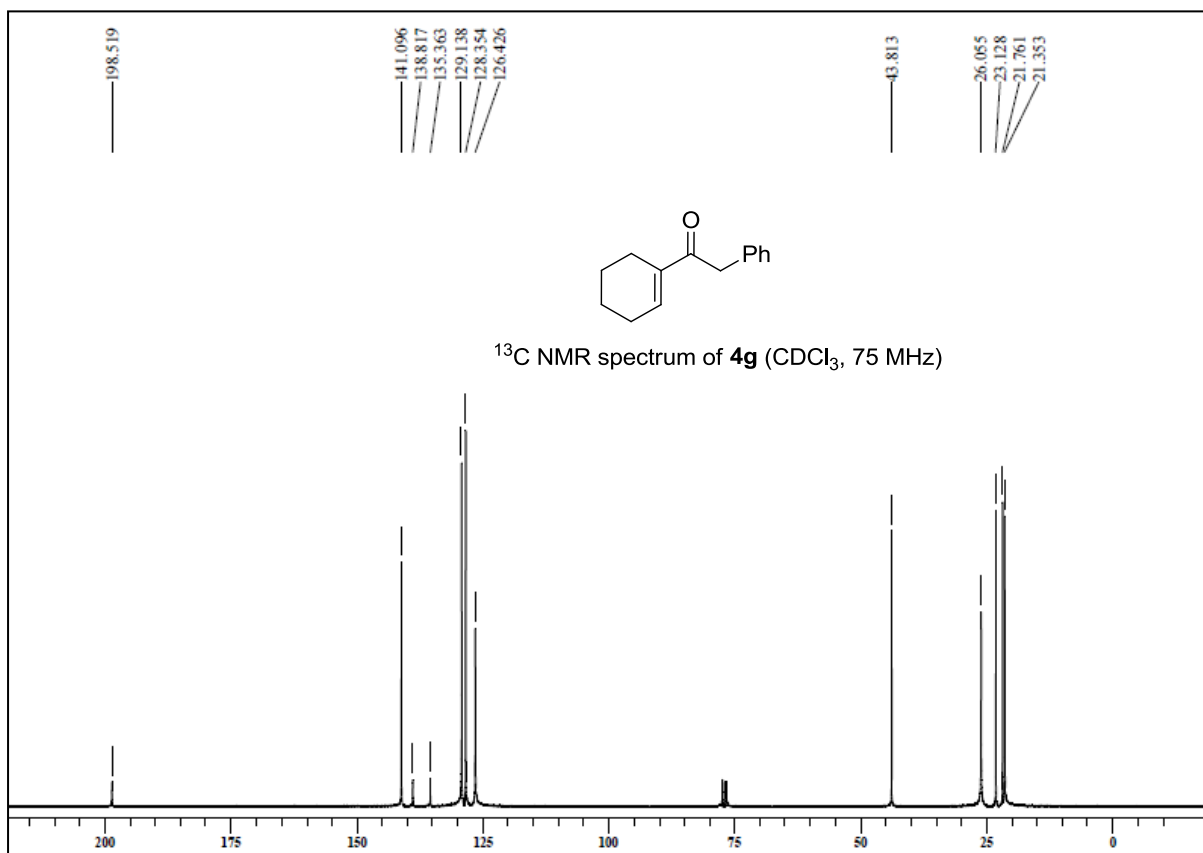



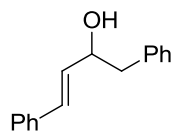

$^1\text{H}$  NMR spectrum of **h** ( $\text{CDCl}_3$ , 300 MHz)

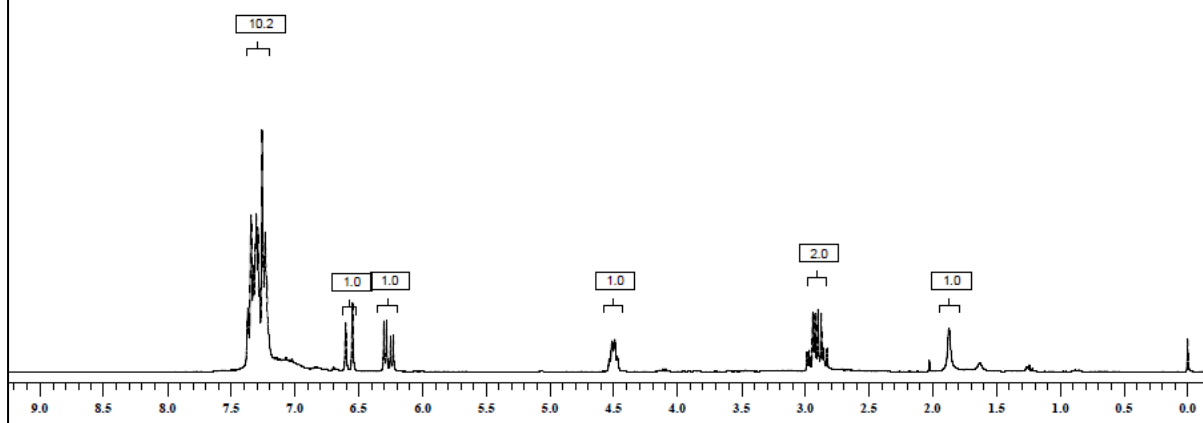

137.623  
136.626  
131.407  
130.293  
129.537  
128.479  
127.592  
126.560  
126.430

73.412

44.120

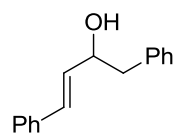

$^{13}\text{C}$  NMR spectrum of **h** ( $\text{CDCl}_3$ , 125 MHz)

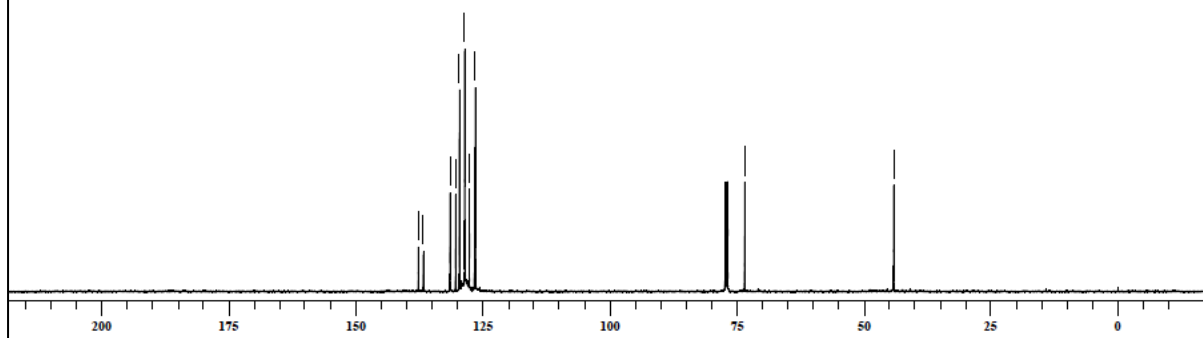

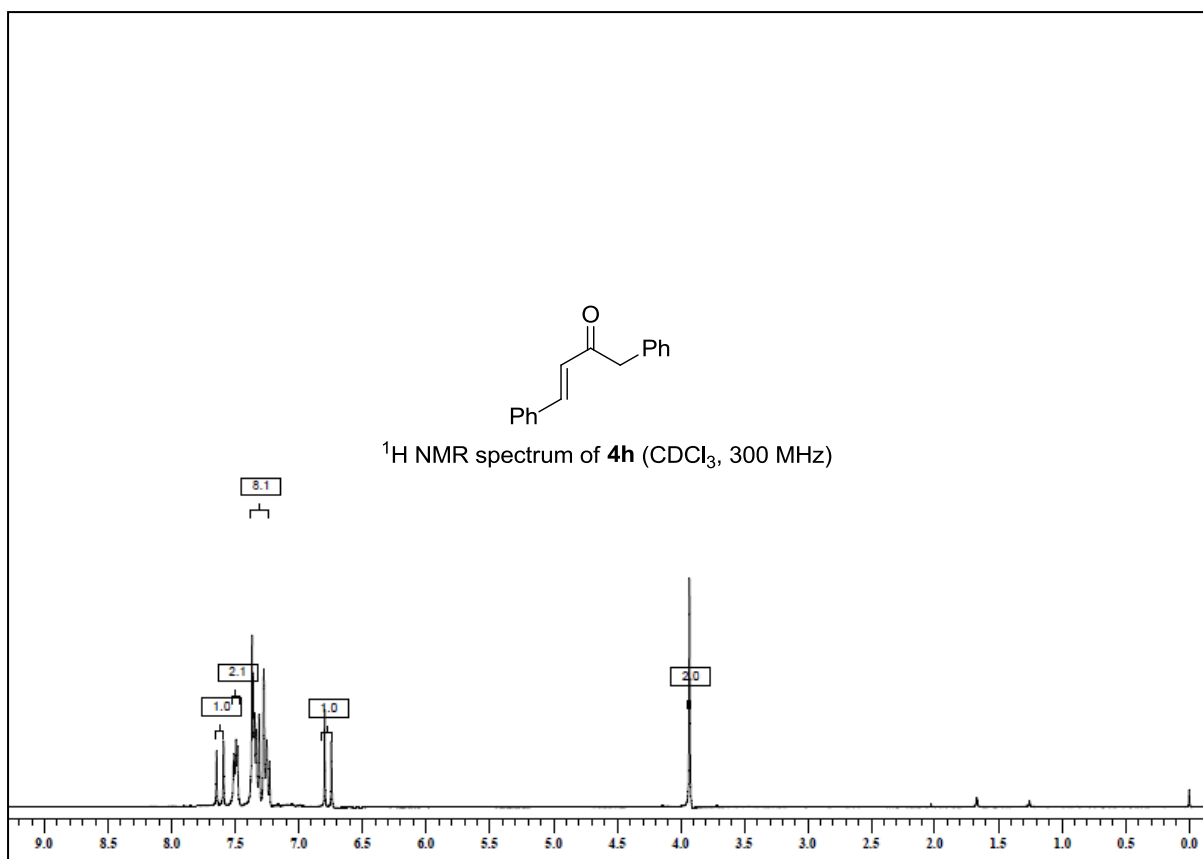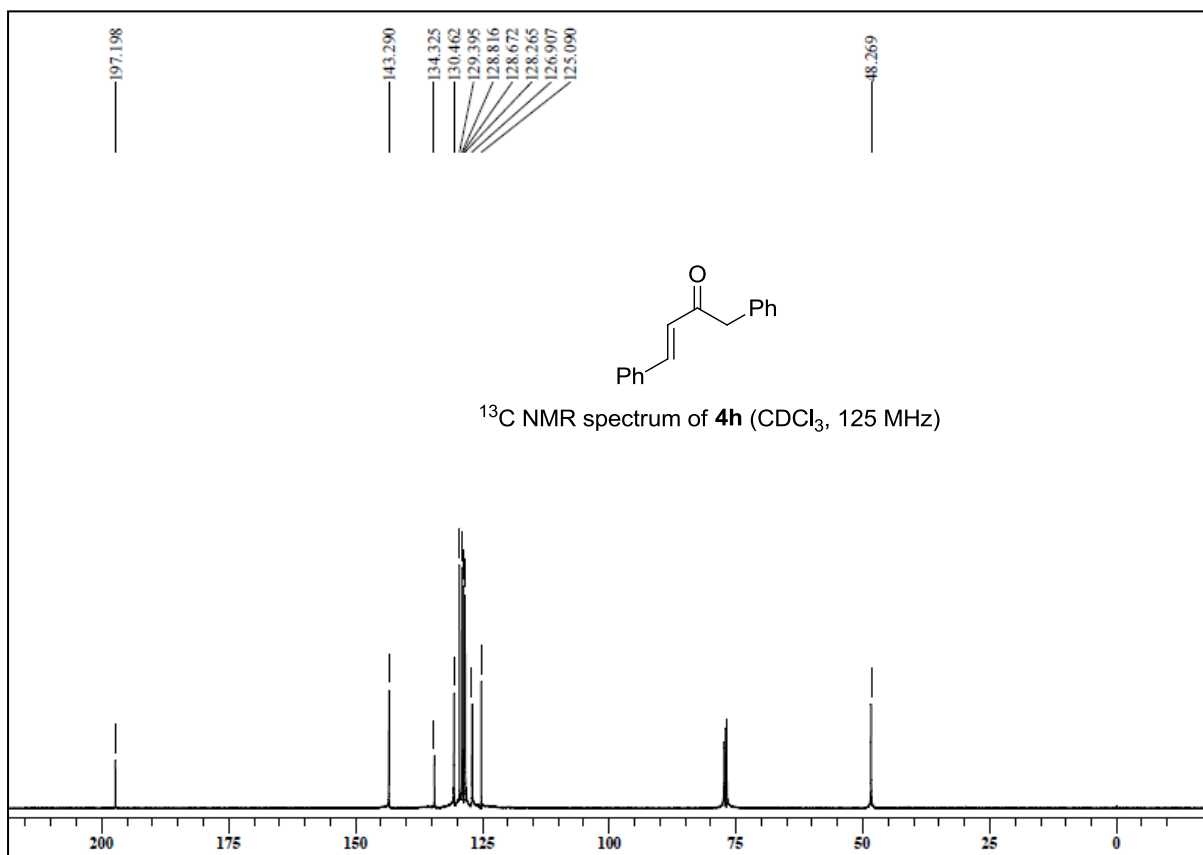

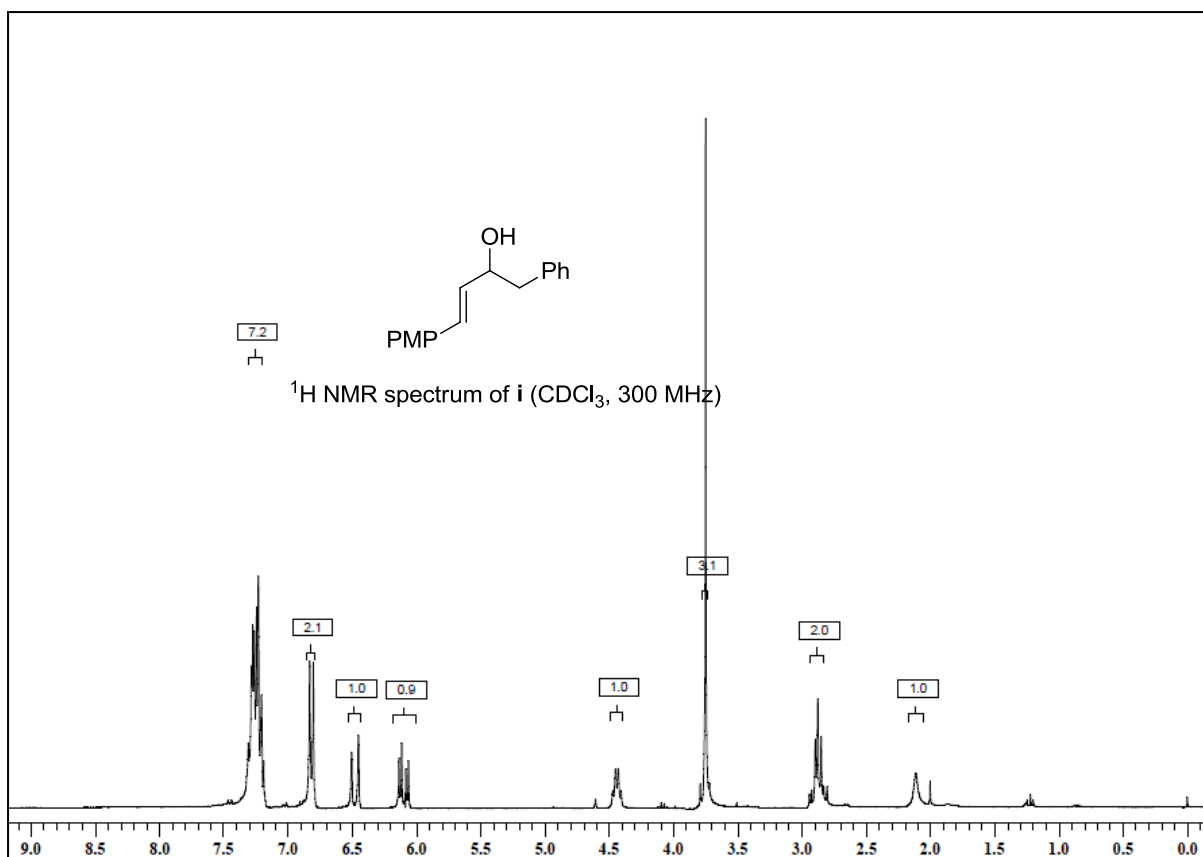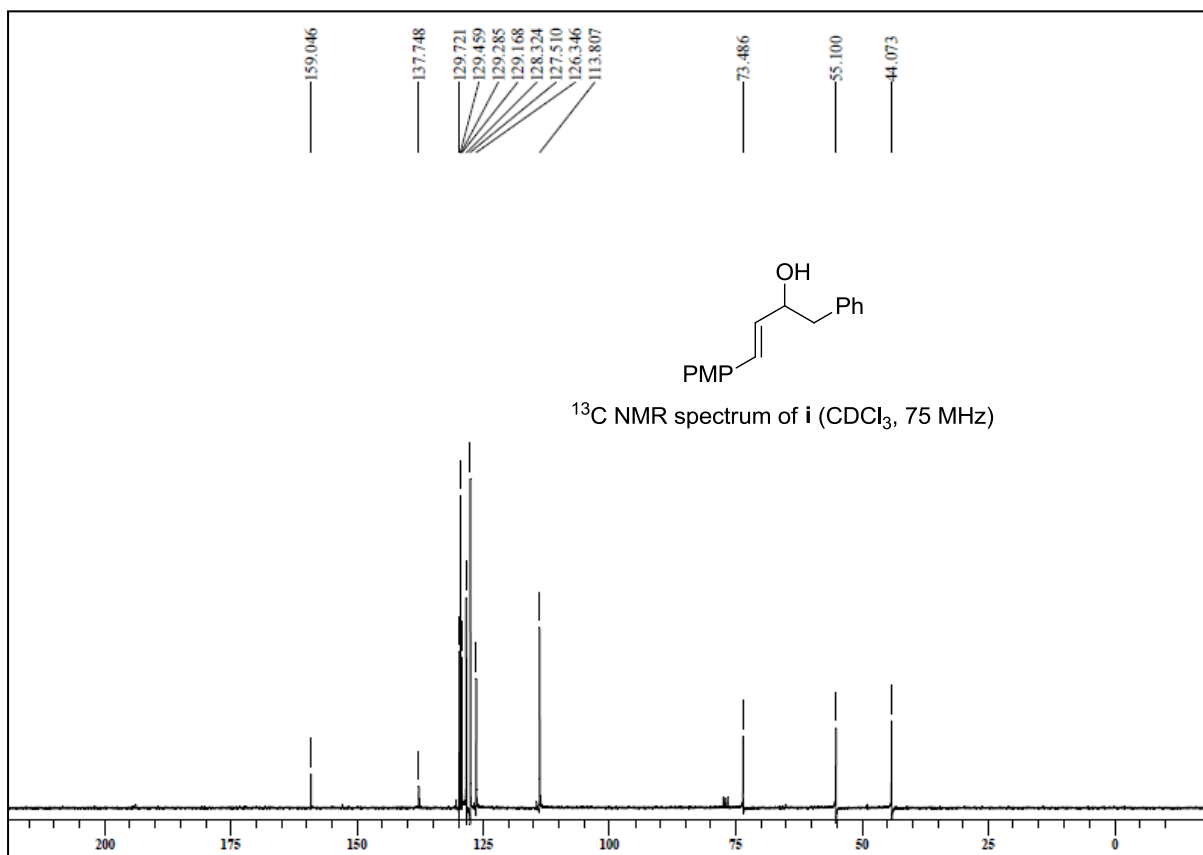

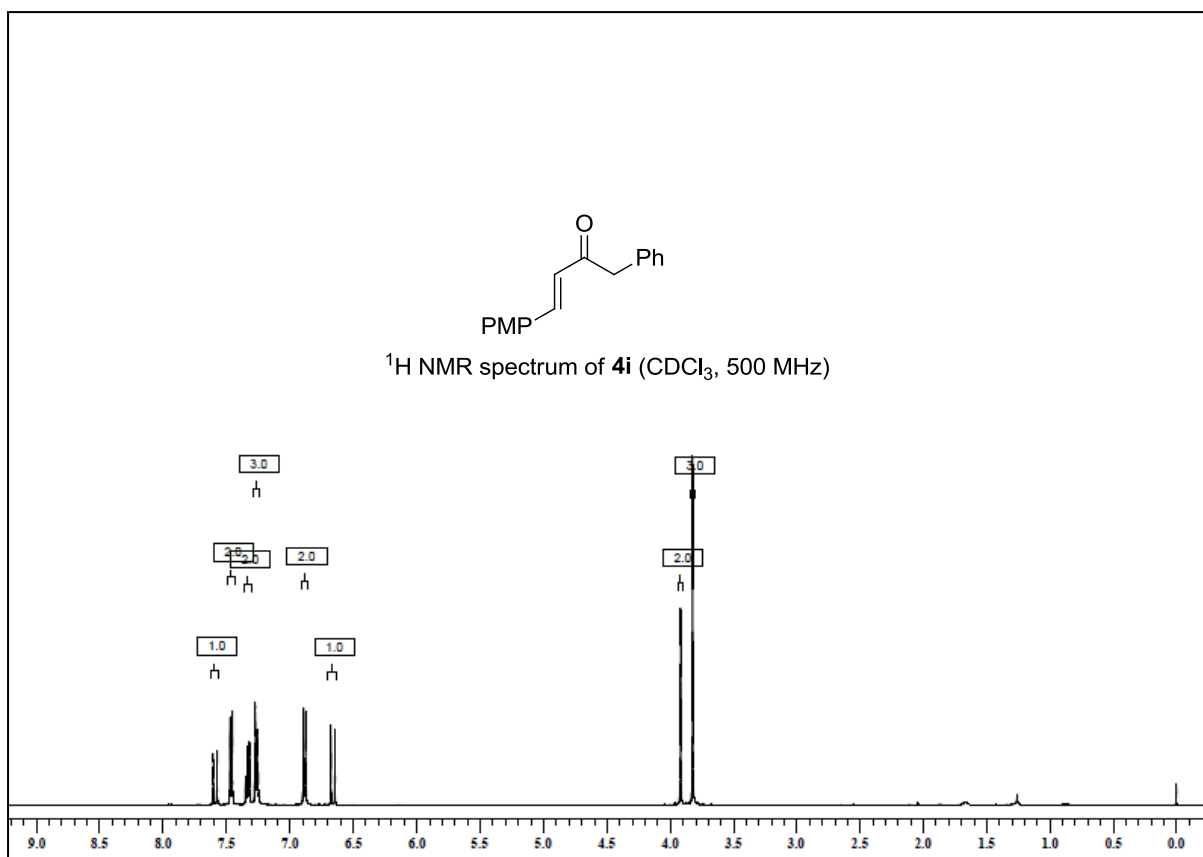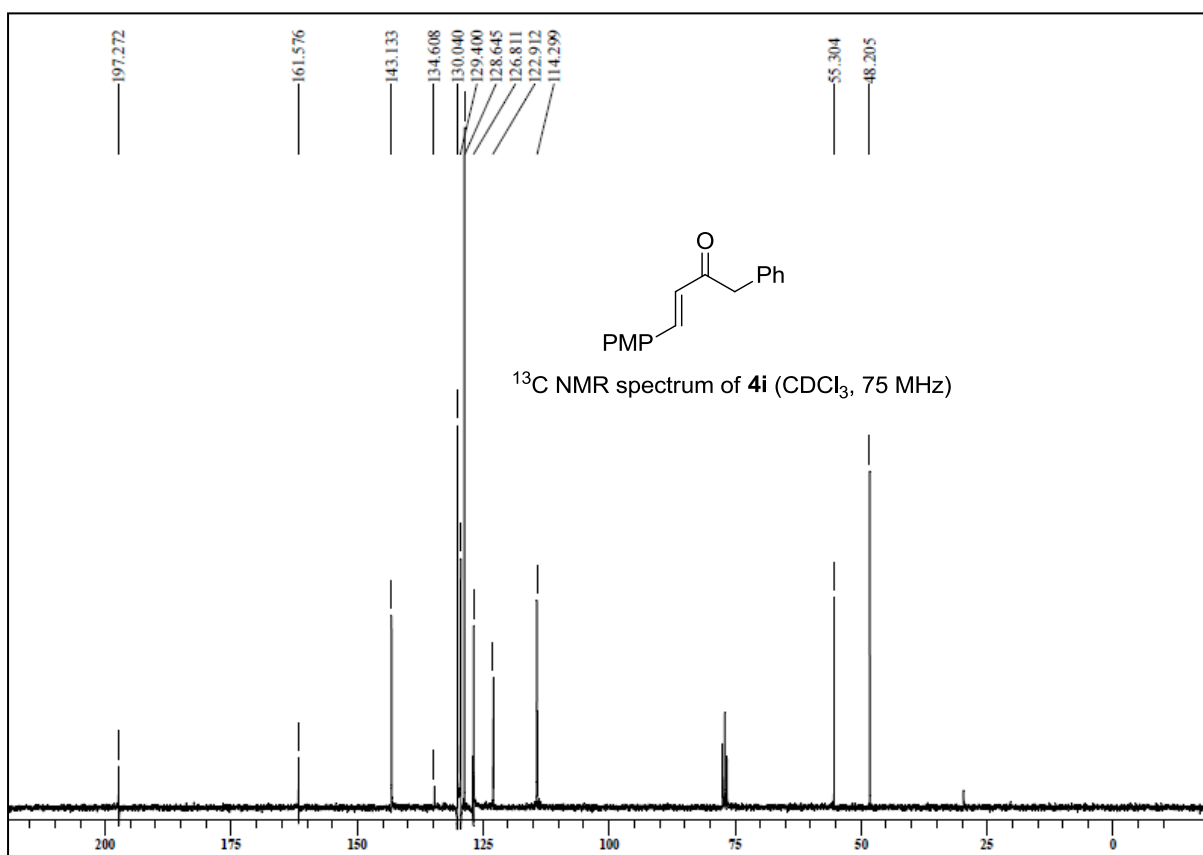

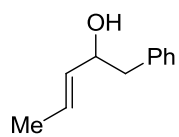

$^1\text{H}$  NMR spectrum of j ( $\text{CDCl}_3$ , 500 MHz)

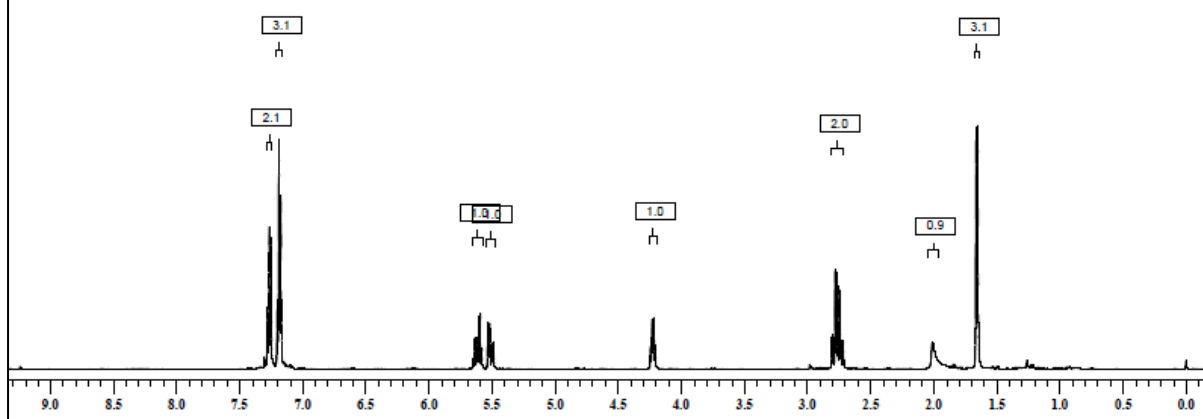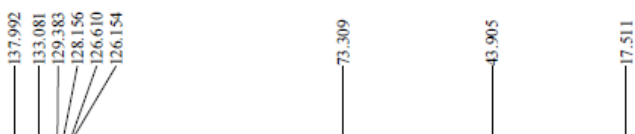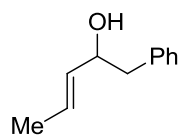

$^{13}\text{C}$  NMR spectrum of j ( $\text{CDCl}_3$ , 125 MHz)

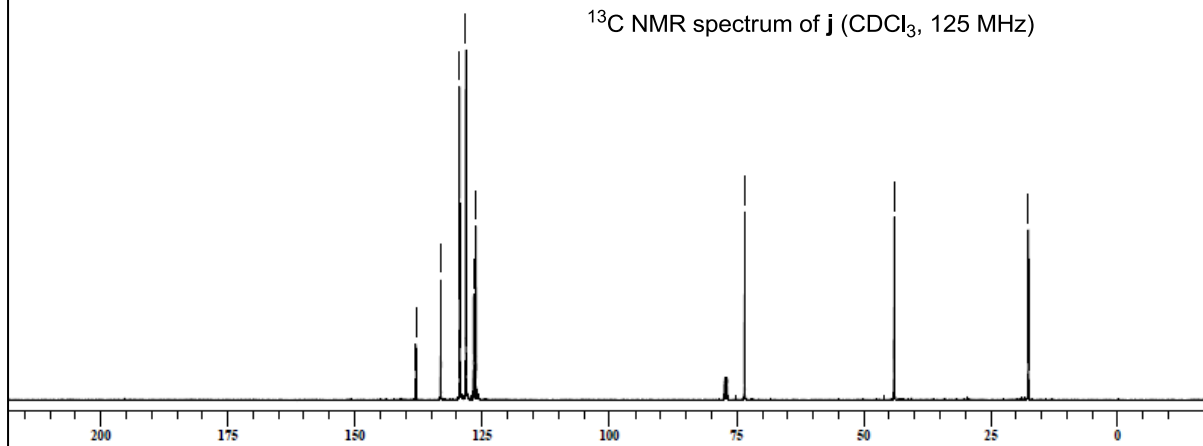

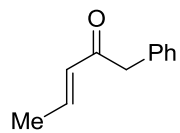

$^1\text{H}$  NMR spectrum of **4j** ( $\text{CDCl}_3$ , 500 MHz)

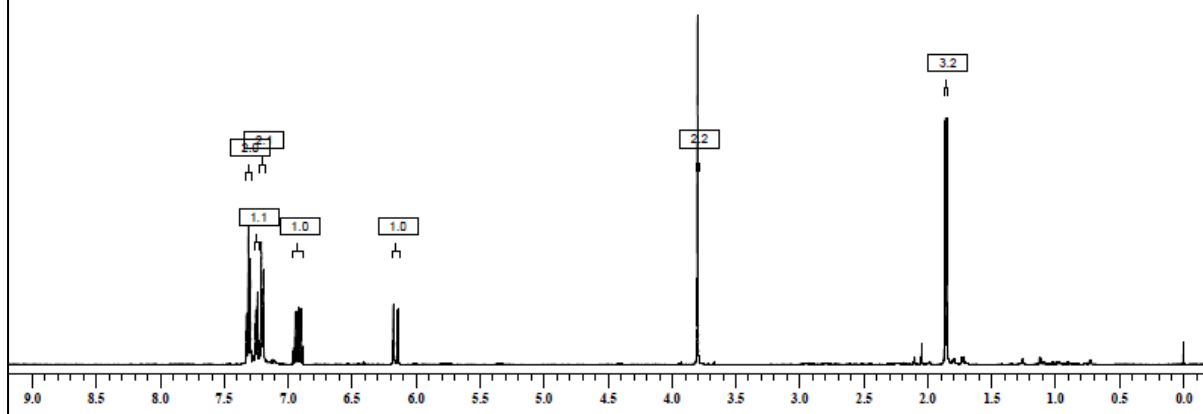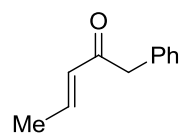

$^{13}\text{C}$  NMR spectrum of **4j** ( $\text{CDCl}_3$ , 75 MHz)

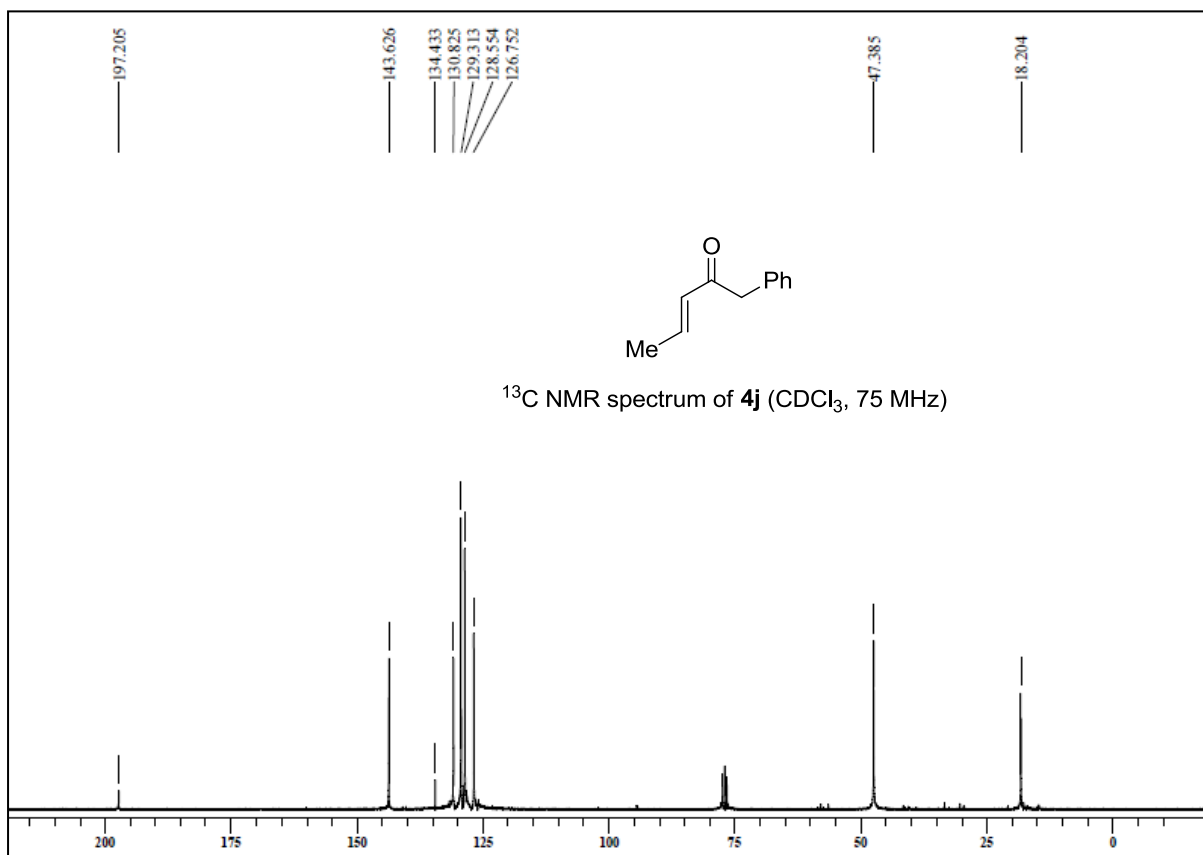

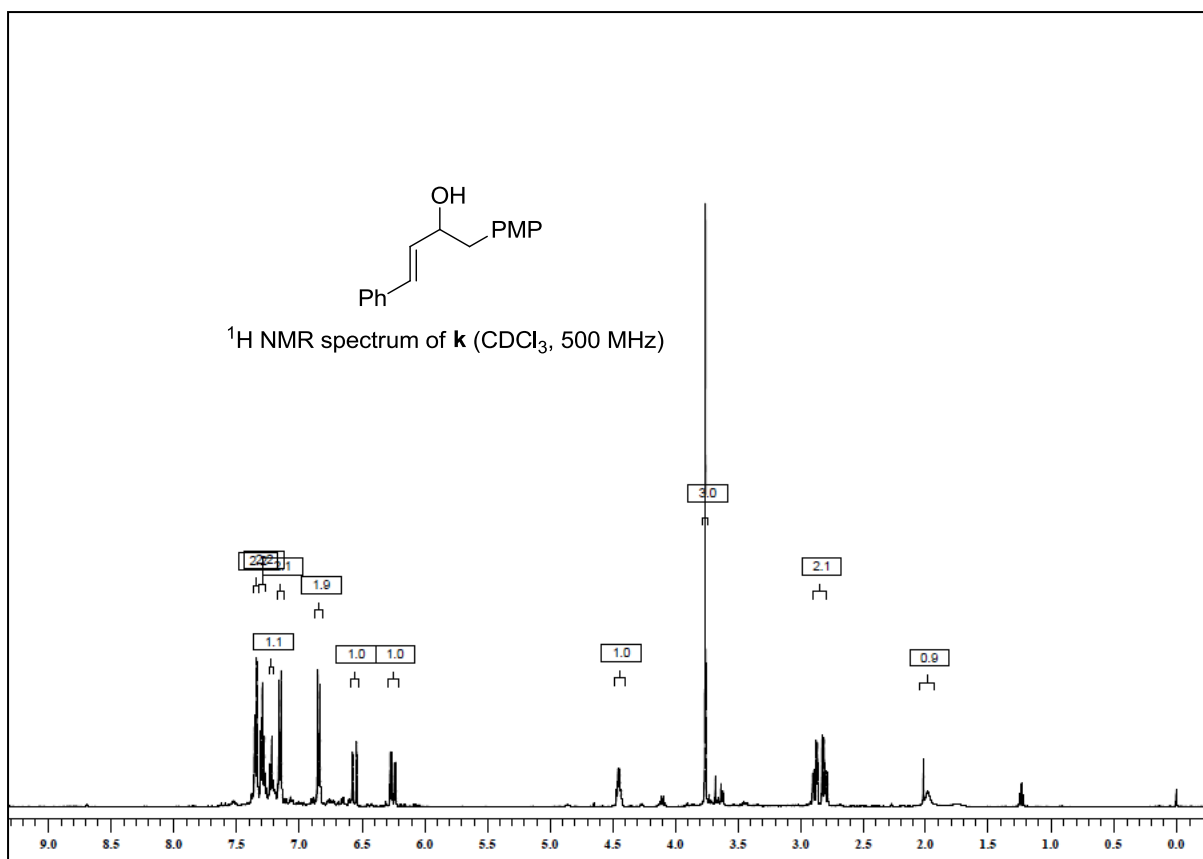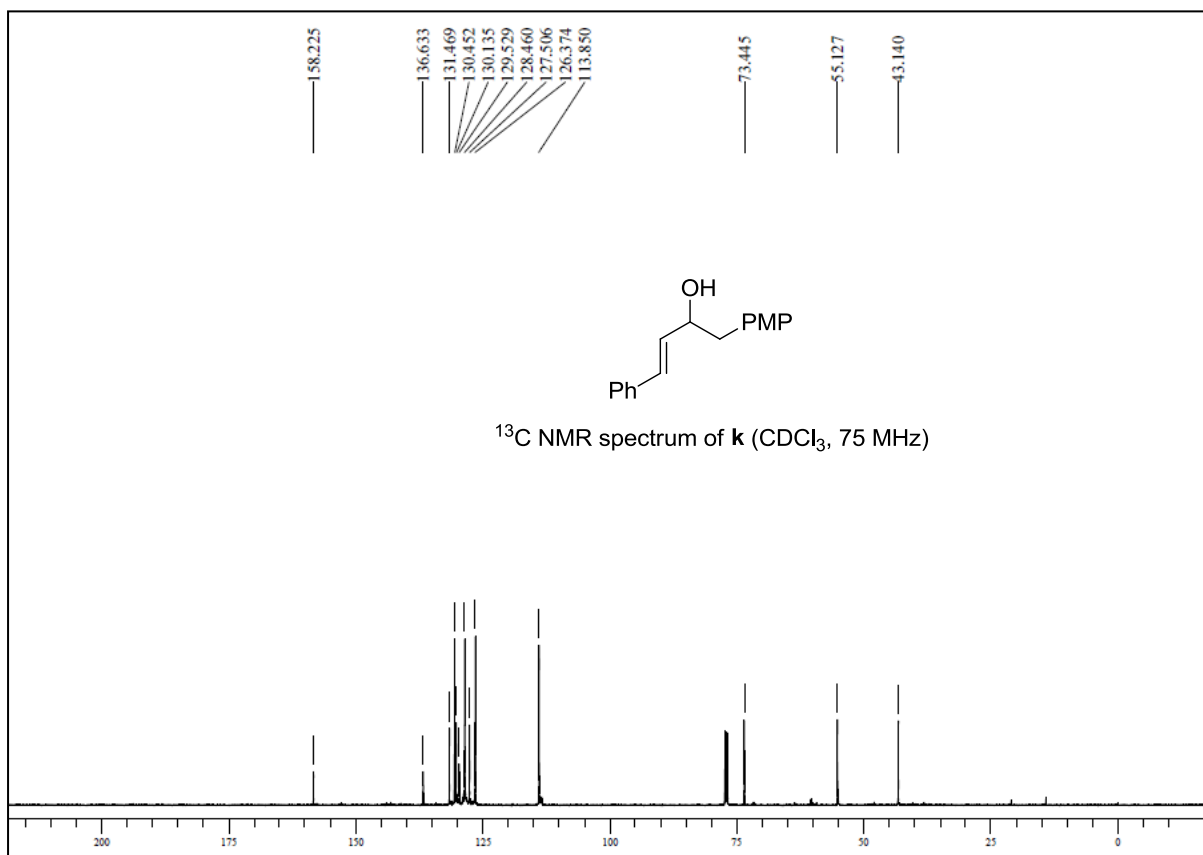

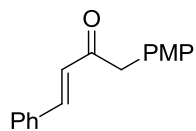

$^1\text{H}$  NMR spectrum of **4k** ( $\text{CDCl}_3$ , 300 MHz)

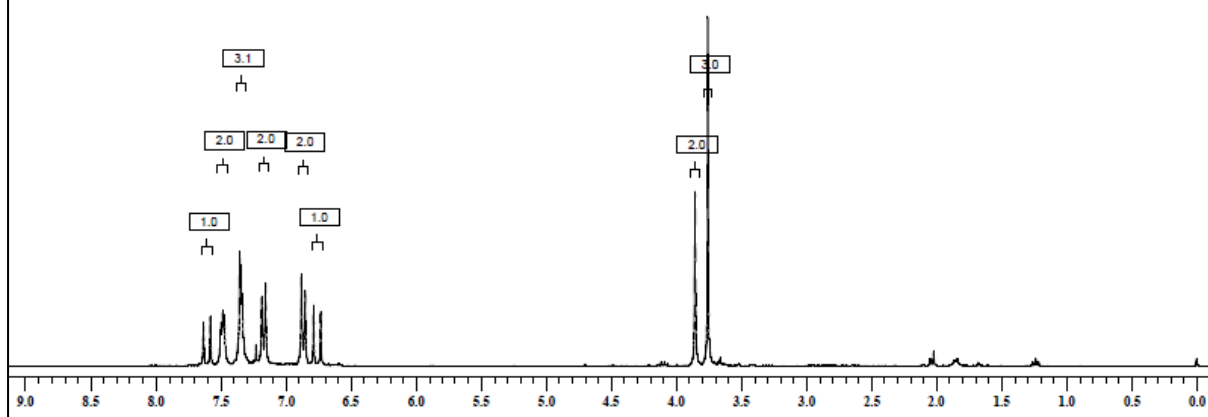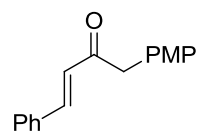

$^{13}\text{C}$  NMR spectrum of **4k** ( $\text{CDCl}_3$ , 125 MHz)

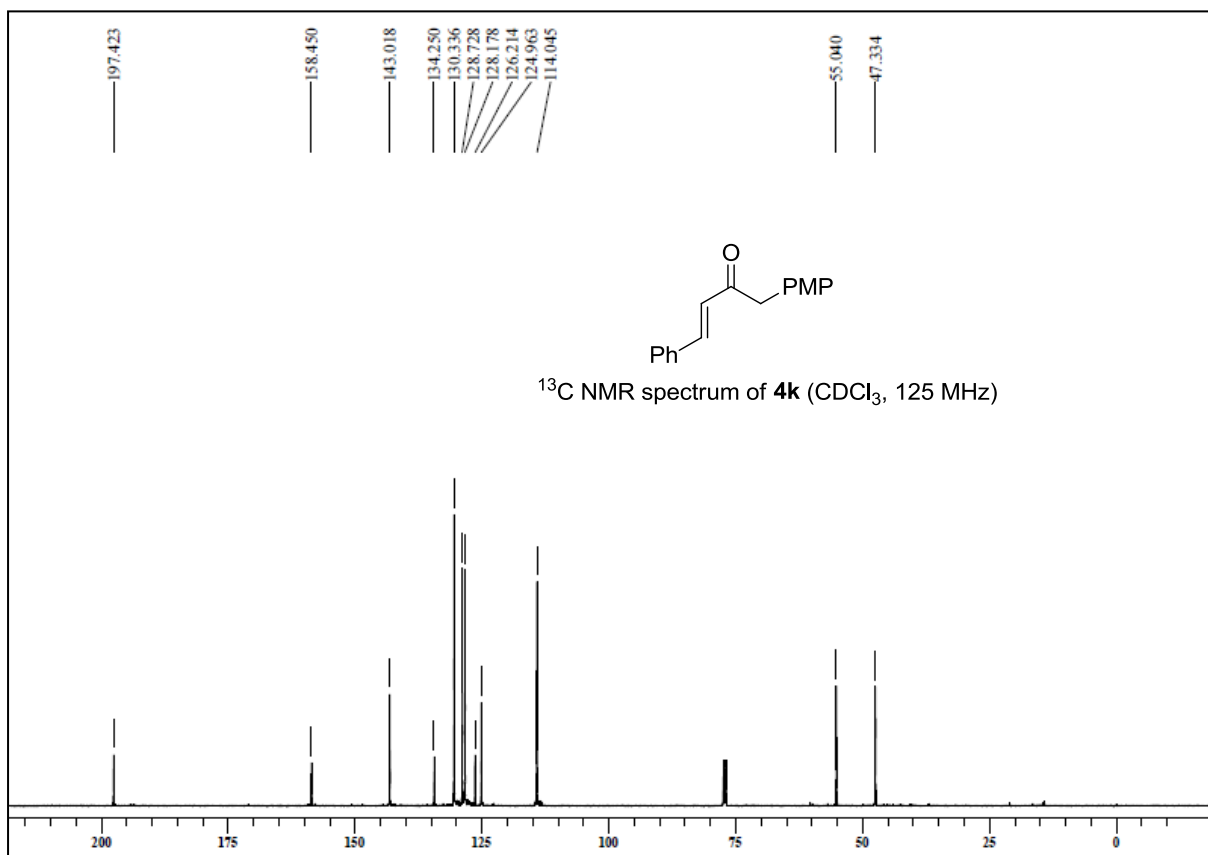



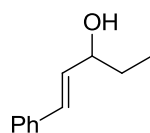

$^1\text{H}$  NMR spectrum of **aa** ( $\text{CDCl}_3$ , 300 MHz)

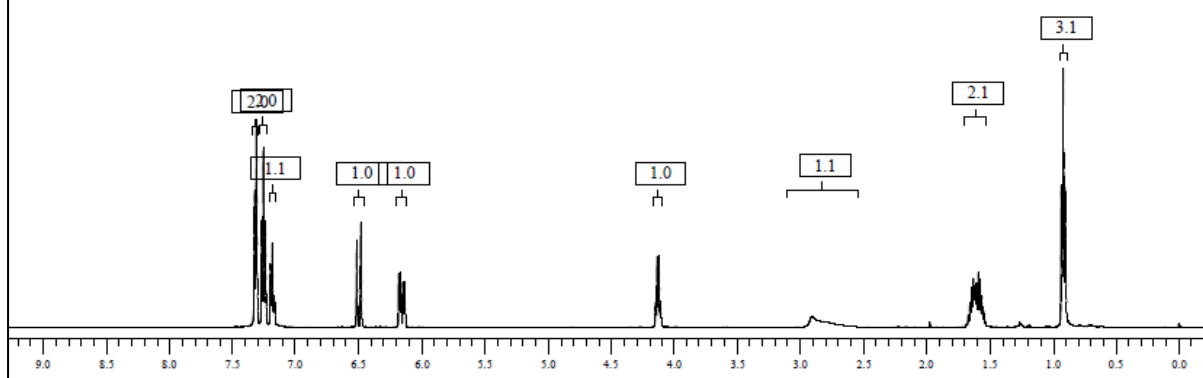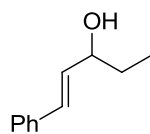

$^{13}\text{C}$  NMR spectrum of **aa** ( $\text{CDCl}_3$ , 75 MHz)

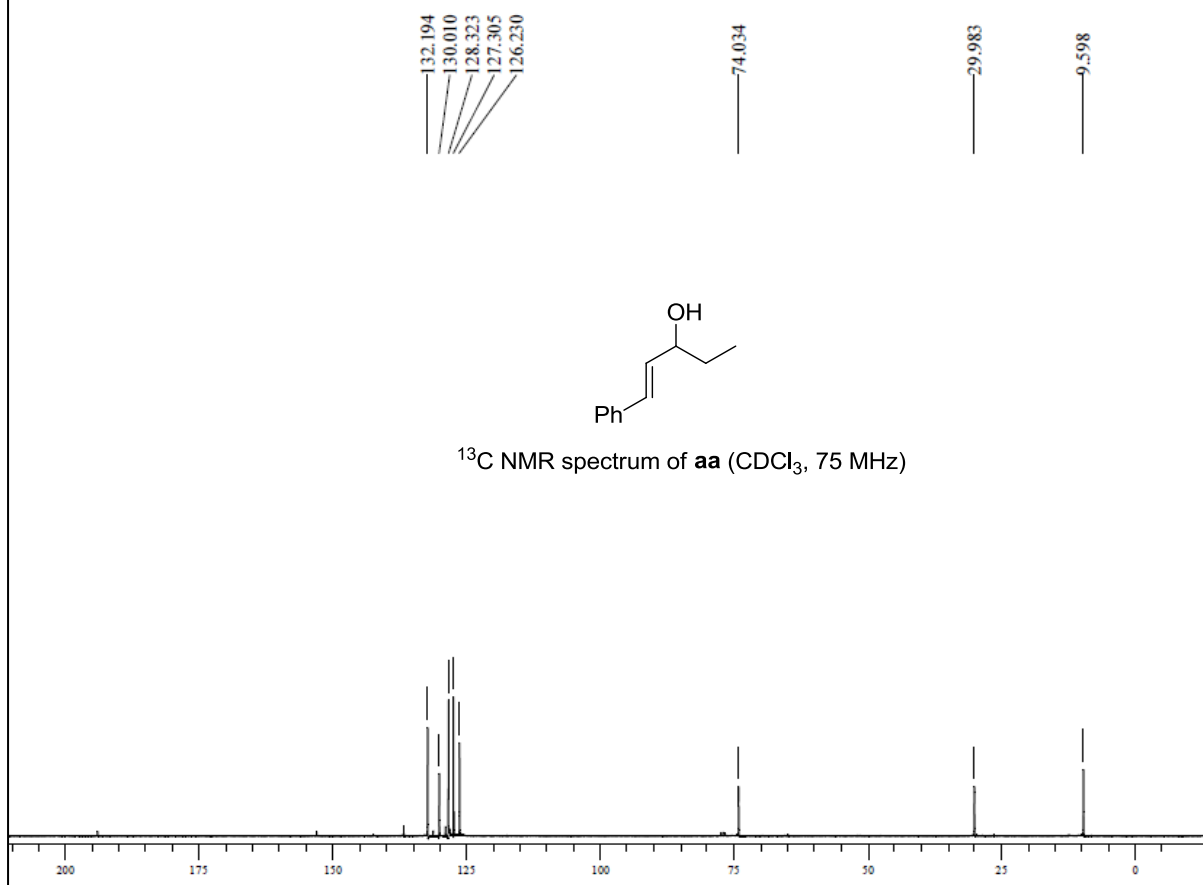

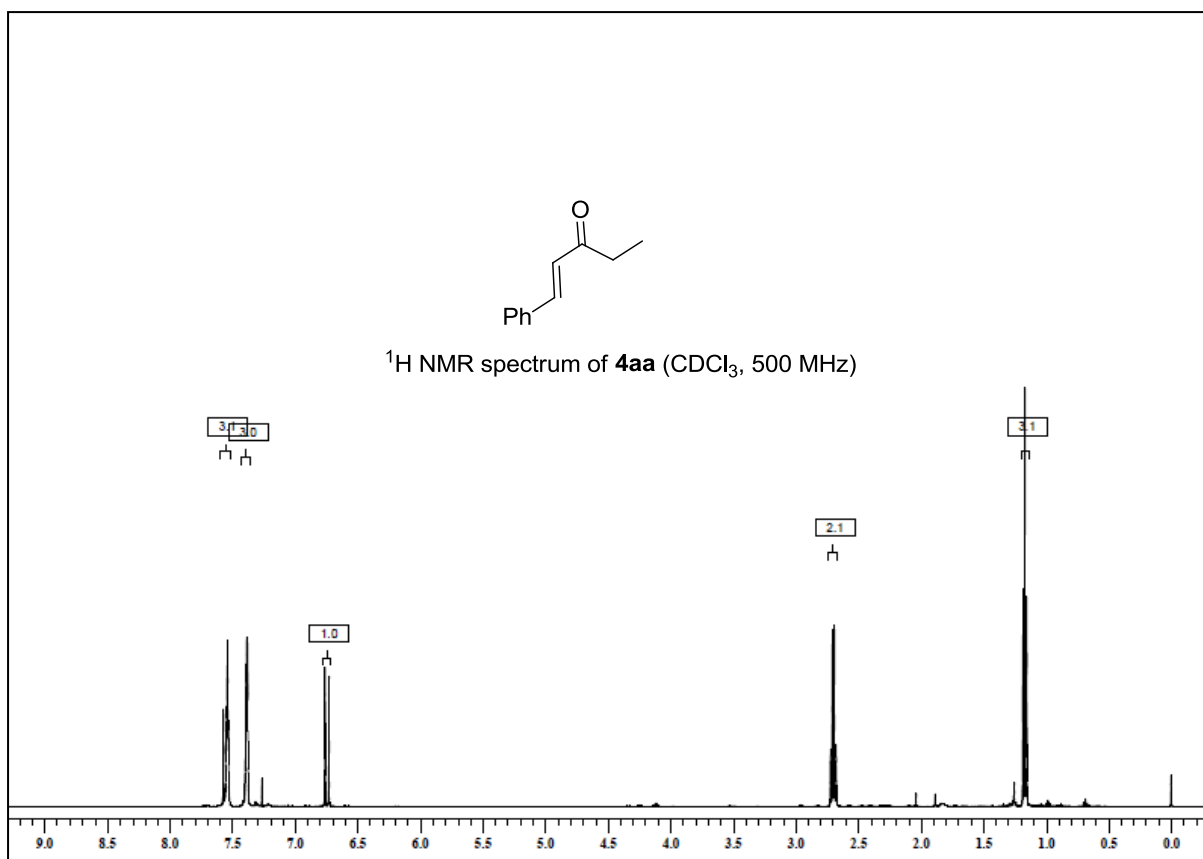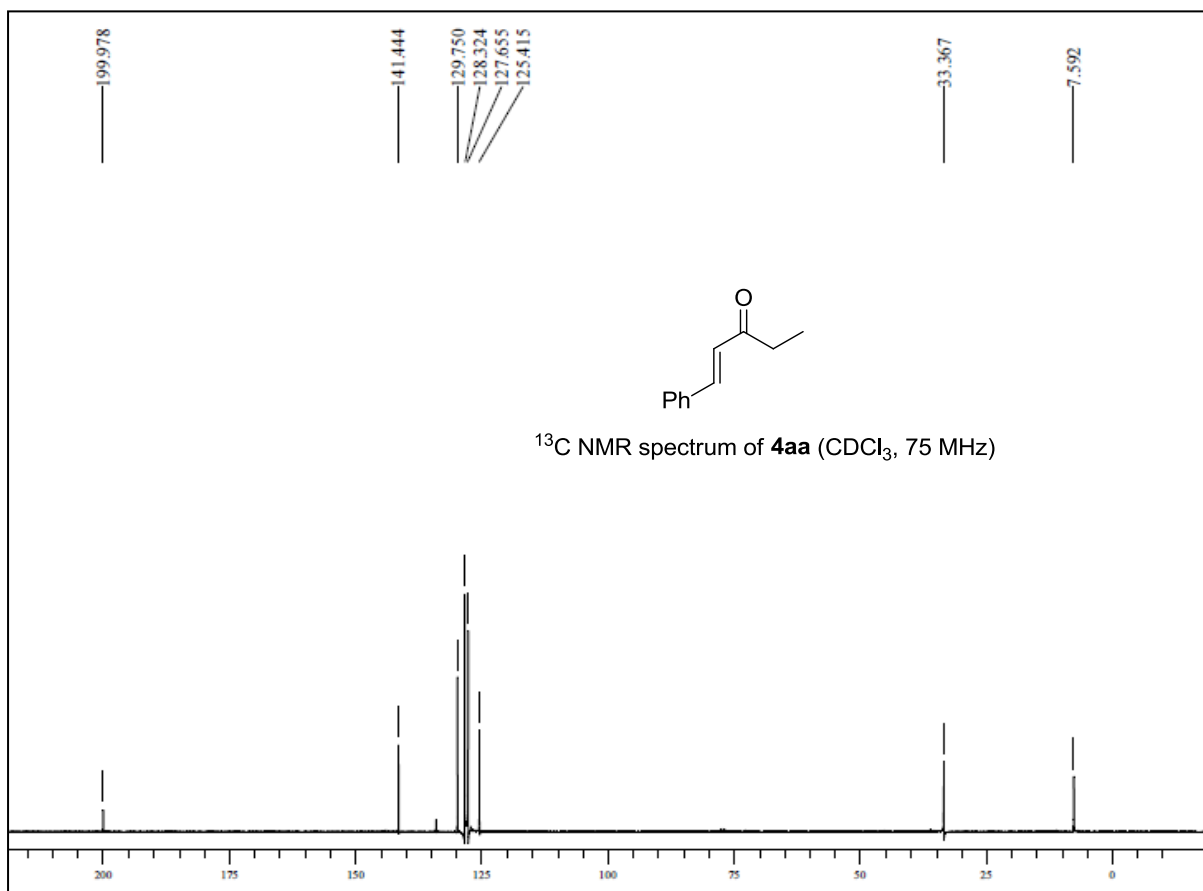

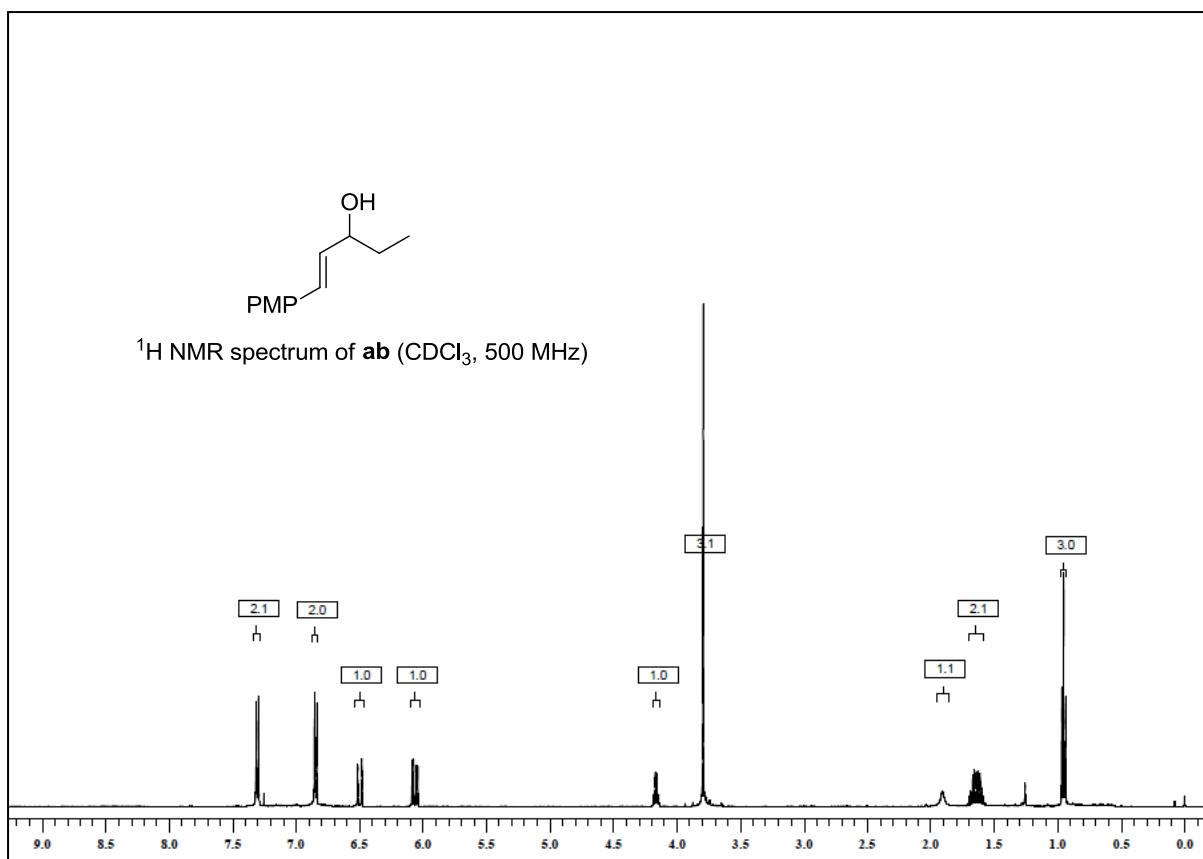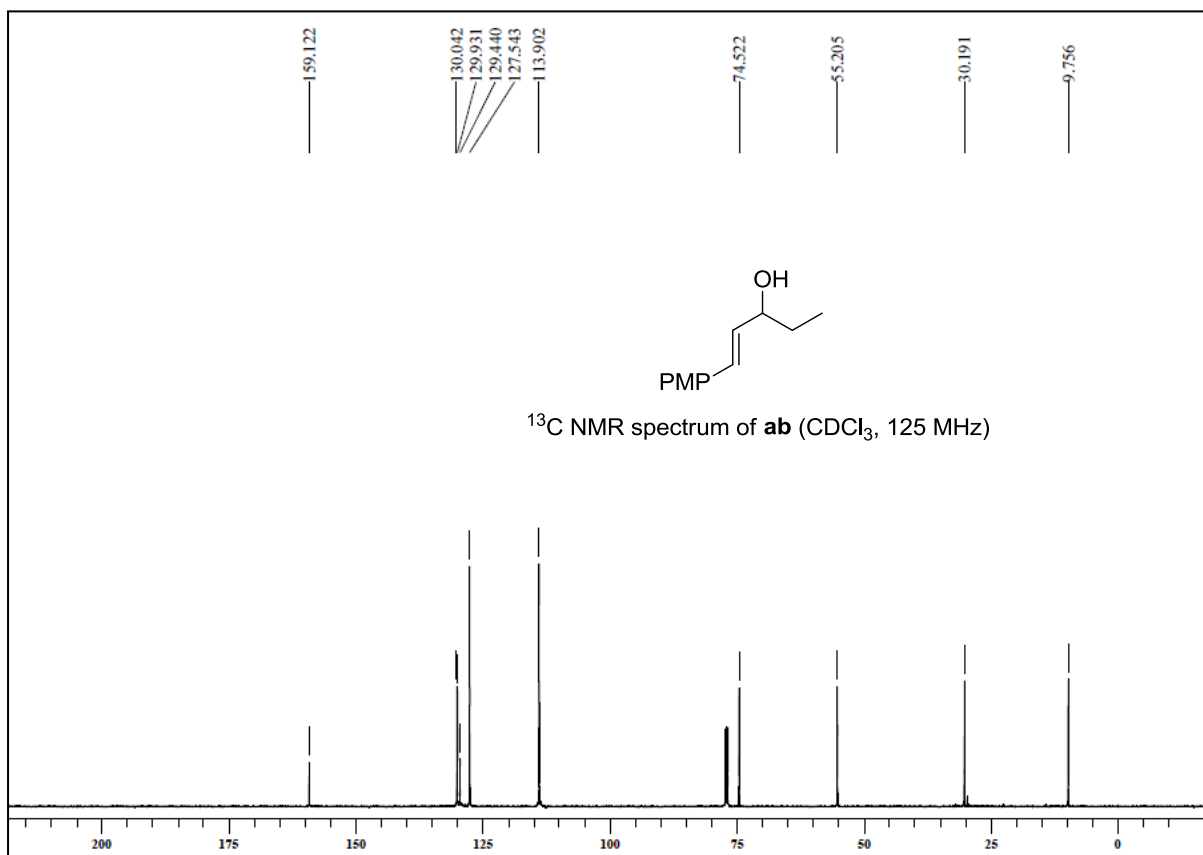

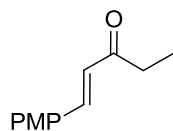

$^1\text{H}$  NMR spectrum of **4ab** ( $\text{CDCl}_3$ , 500 MHz)

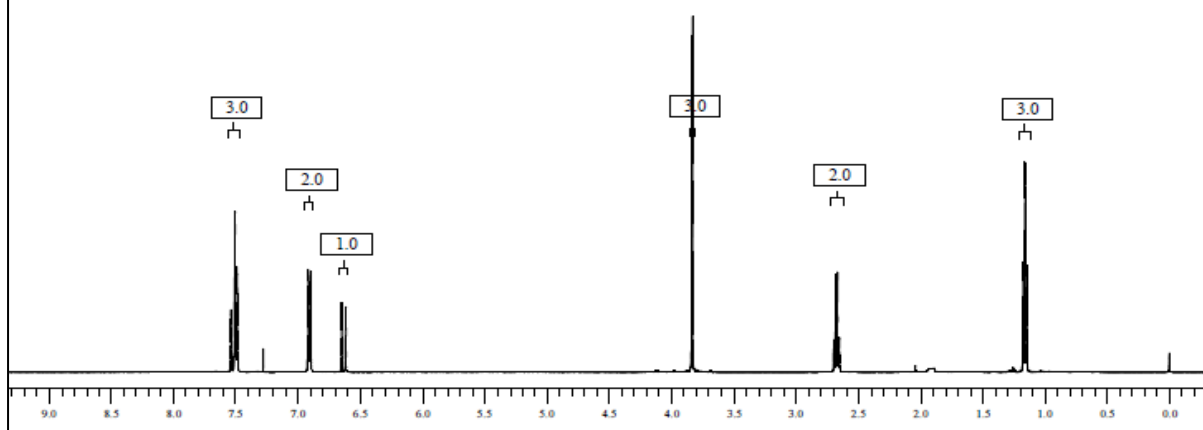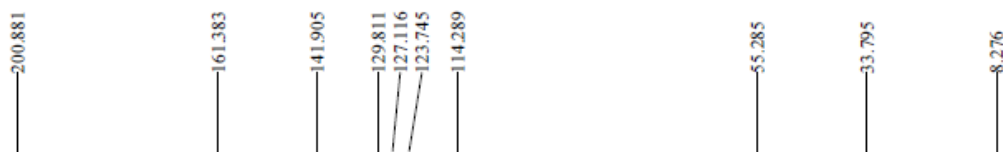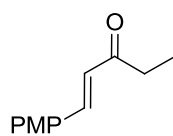

$^{13}\text{C}$  NMR spectrum of **4ab** ( $\text{CDCl}_3$ , 125 MHz)

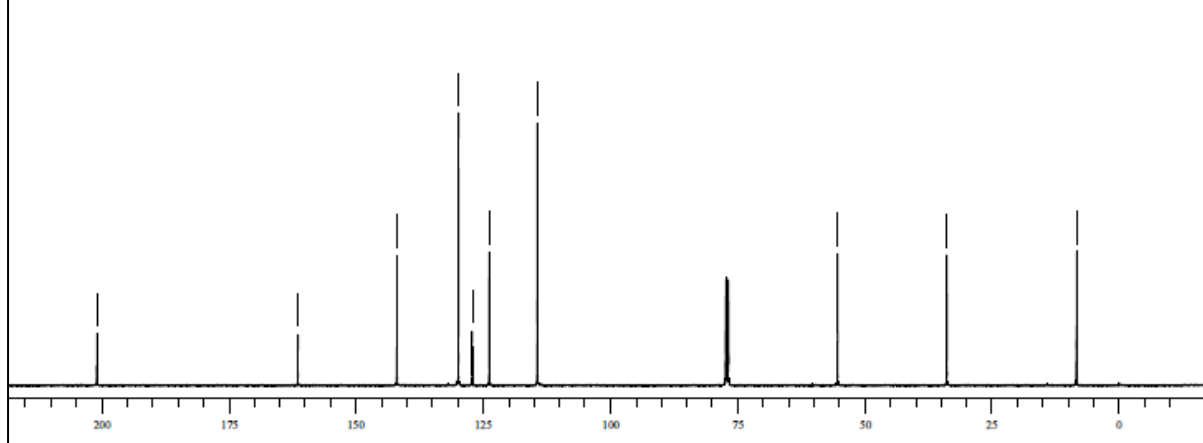

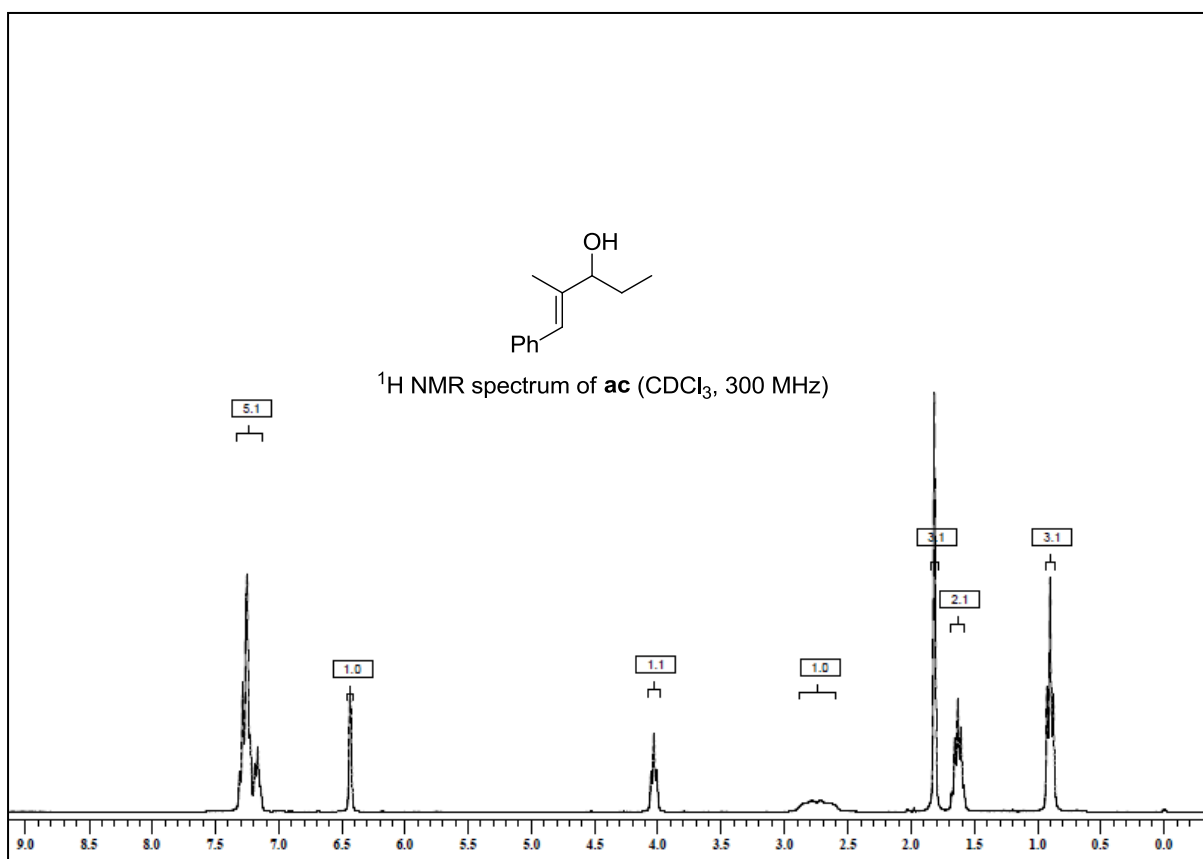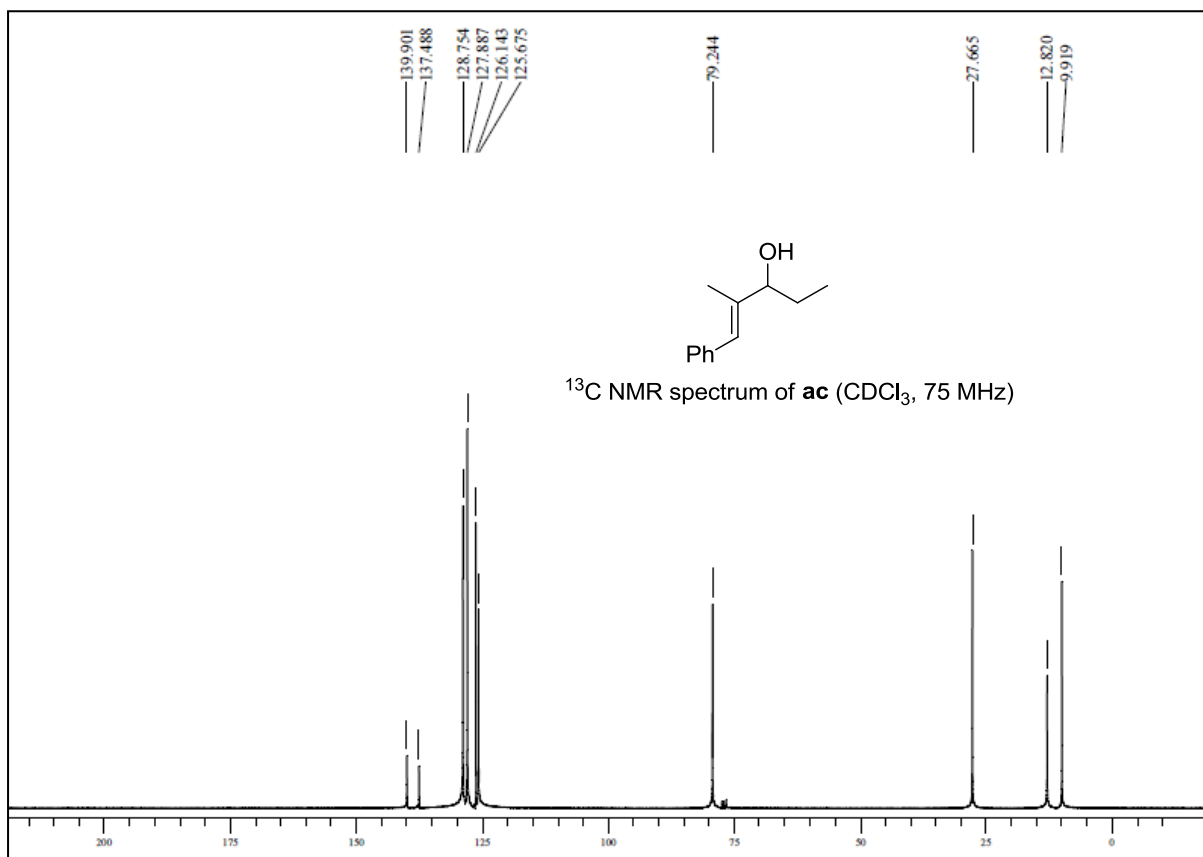

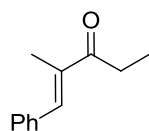

$^1\text{H}$  NMR spectrum of **4ac** ( $\text{CDCl}_3$ , 300 MHz)

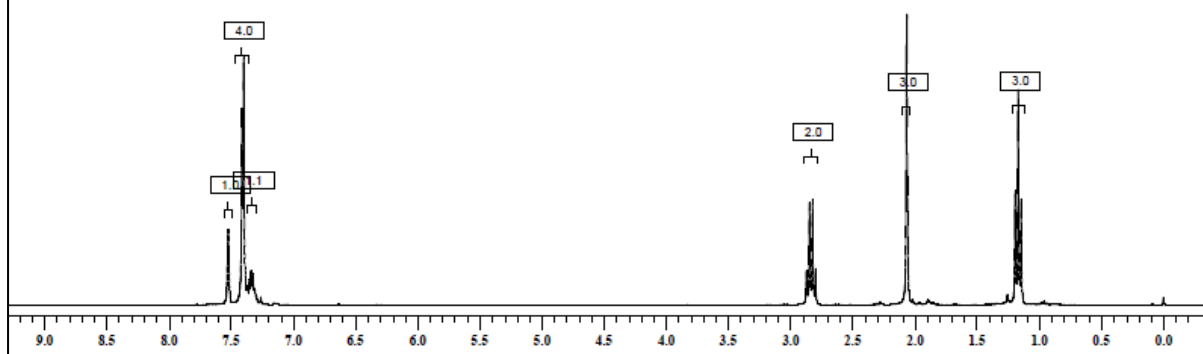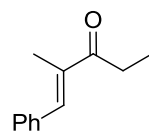

$^{13}\text{C}$  NMR spectrum of **4ac** ( $\text{CDCl}_3$ , 75 MHz)

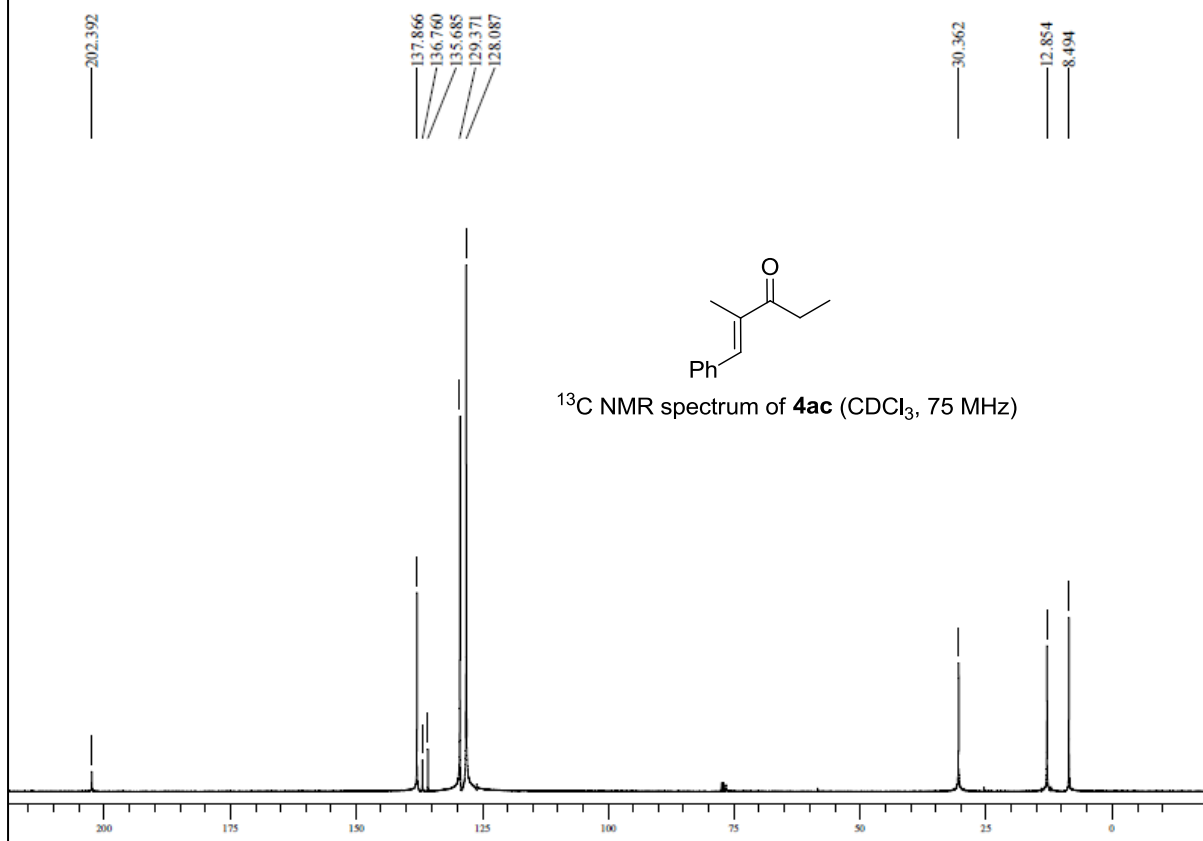

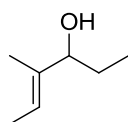

$^1\text{H}$  NMR spectrum of **ae** ( $\text{CDCl}_3$ , 500 MHz)

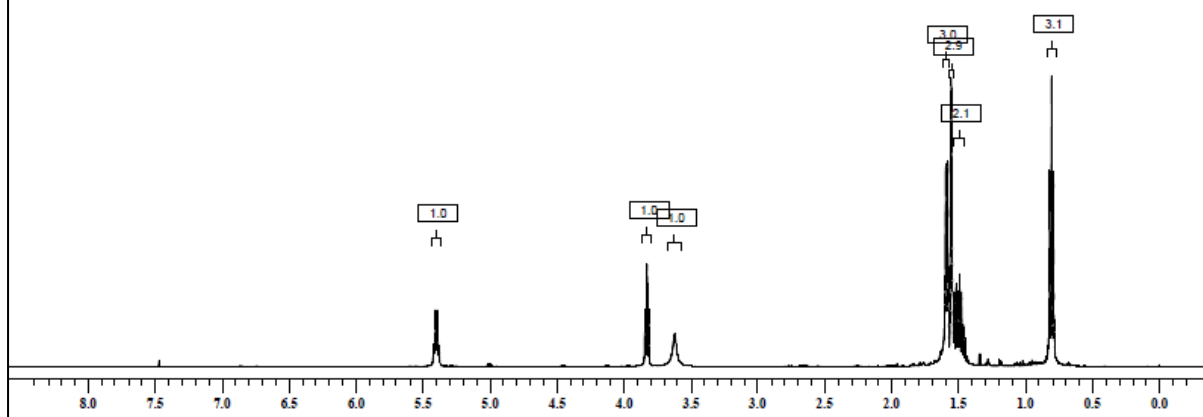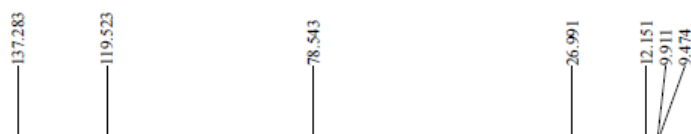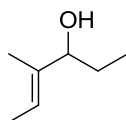

$^{13}\text{C}$  NMR spectrum of **ae** ( $\text{CDCl}_3$ , 75 MHz)

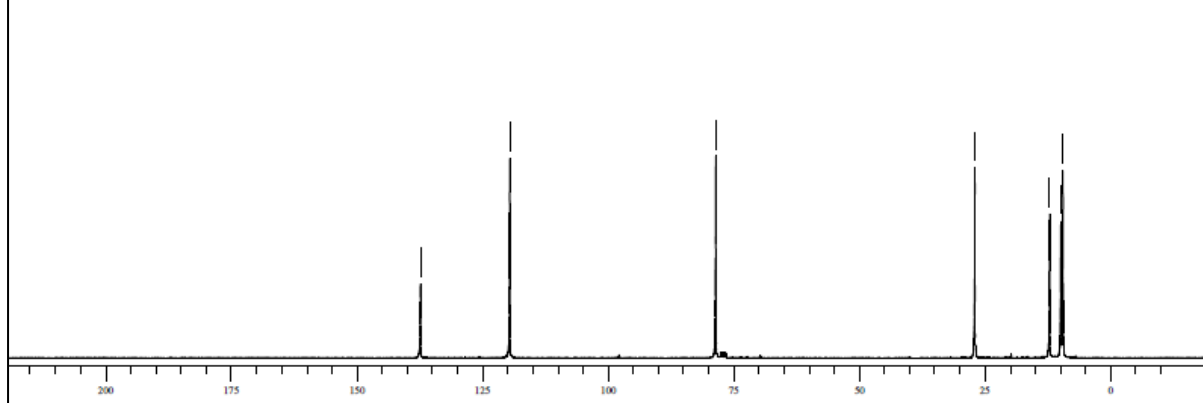

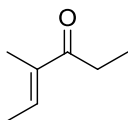

$^1\text{H}$  NMR spectrum of **4ae** ( $\text{CDCl}_3$ , 500 MHz)

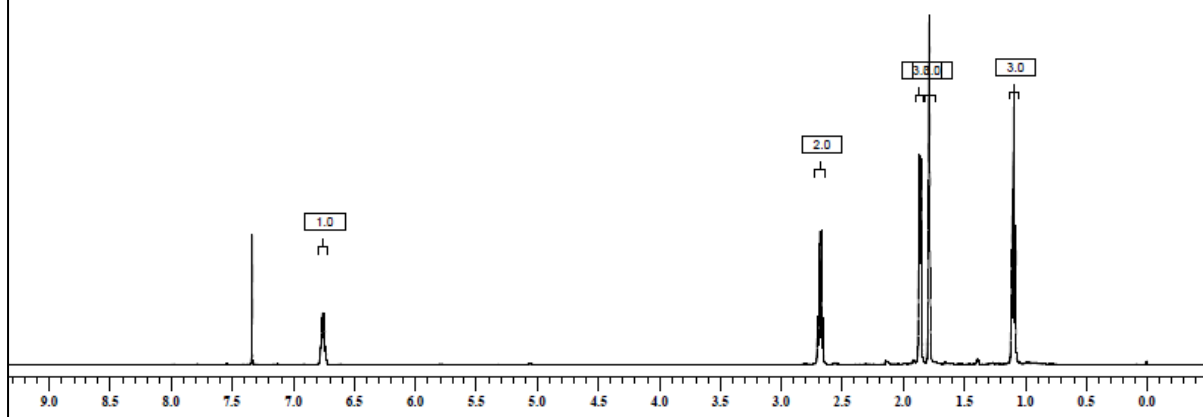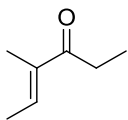

$^{13}\text{C}$  NMR spectrum of **4ae** ( $\text{CDCl}_3$ , 125 MHz)

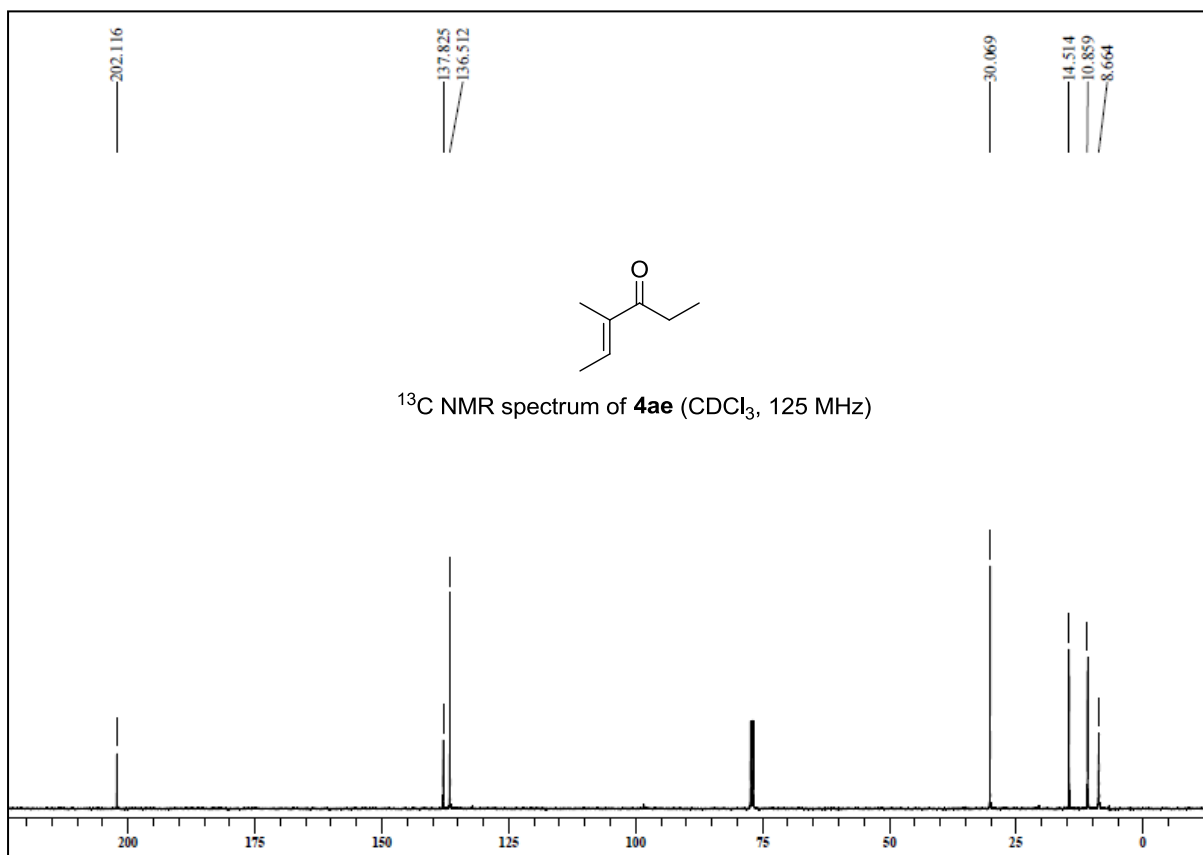



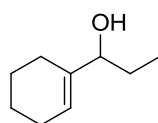

$^1\text{H}$  NMR spectrum of **ag** ( $\text{CDCl}_3$ , 500 MHz)

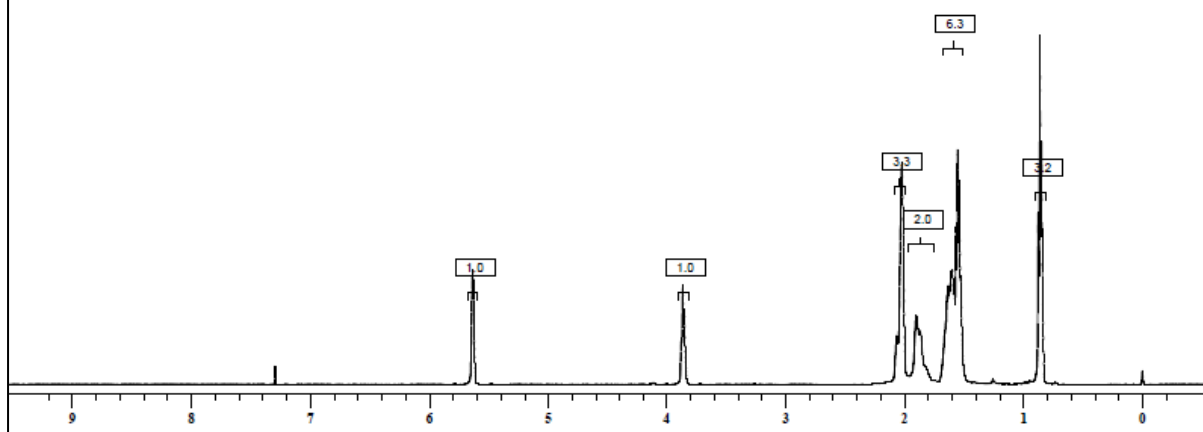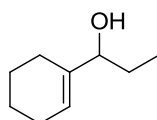

$^{13}\text{C}$  NMR spectrum of **ag** ( $\text{CDCl}_3$ , 75 MHz)

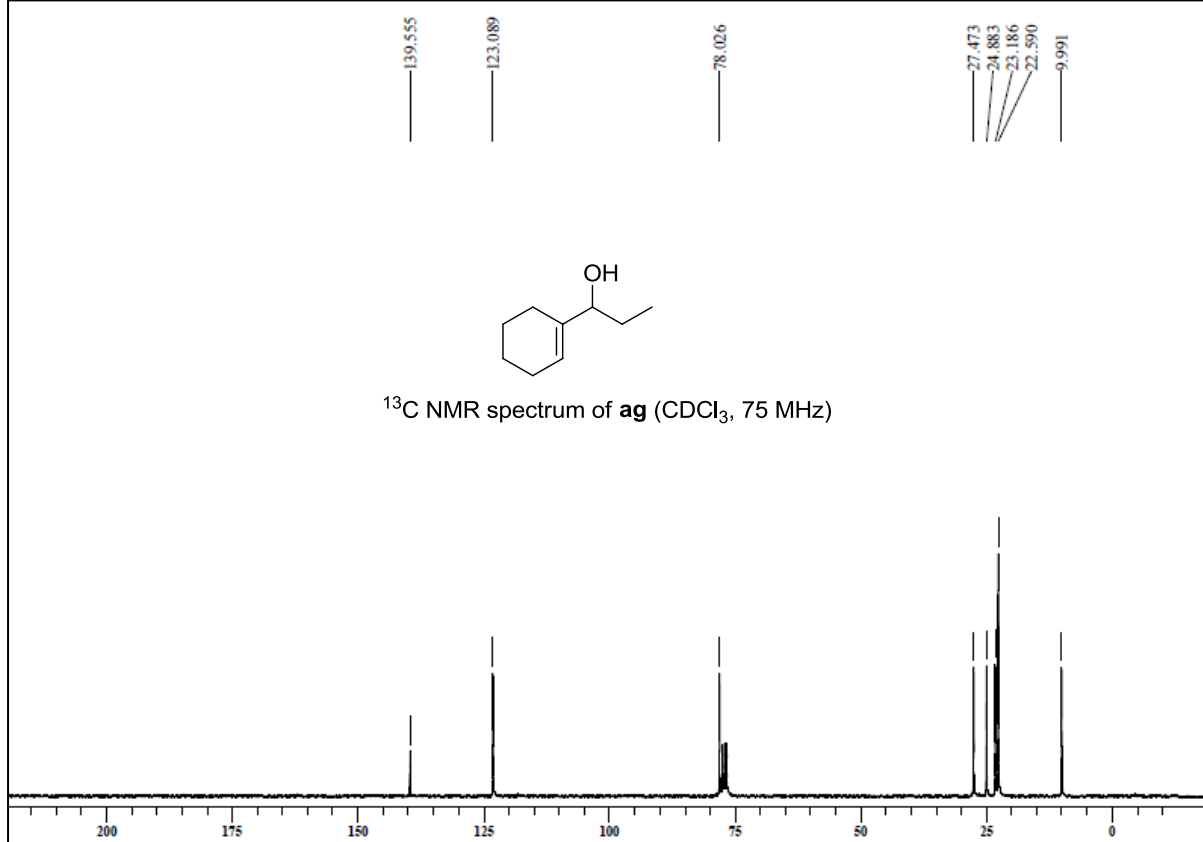

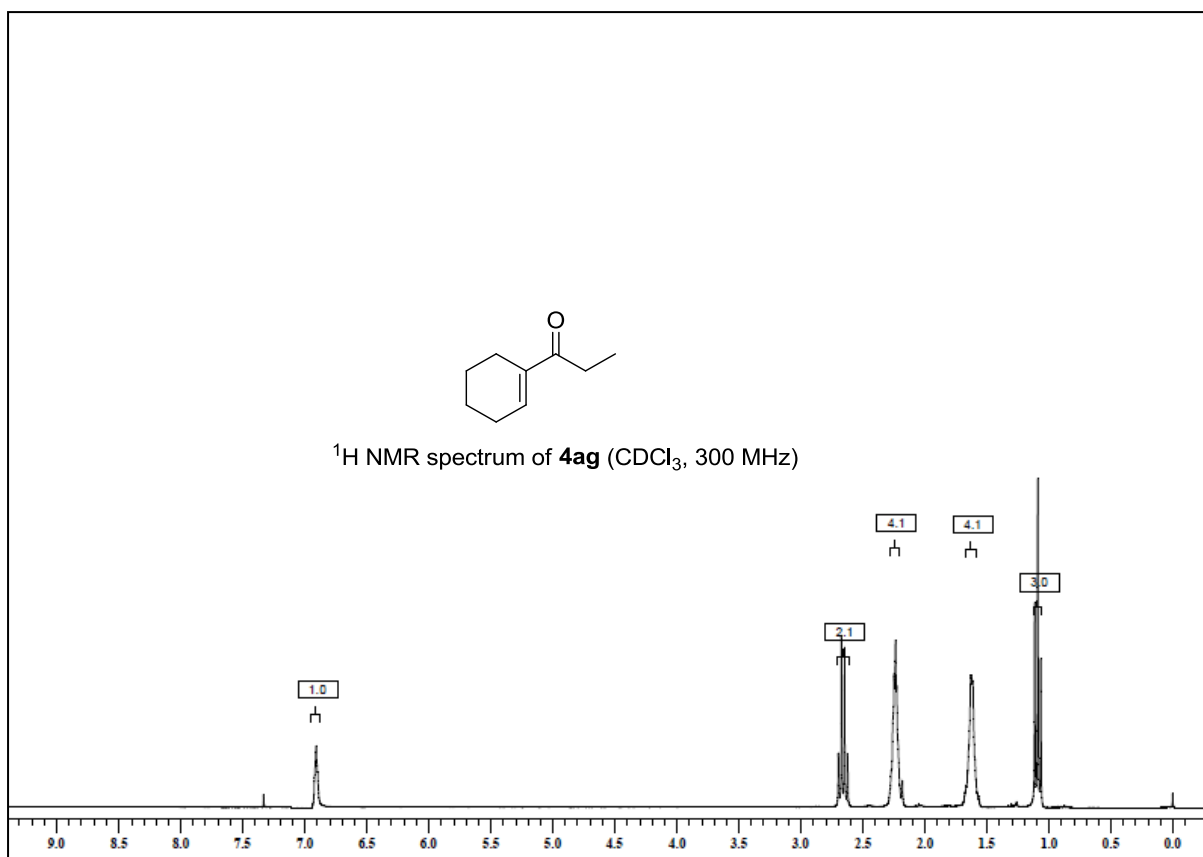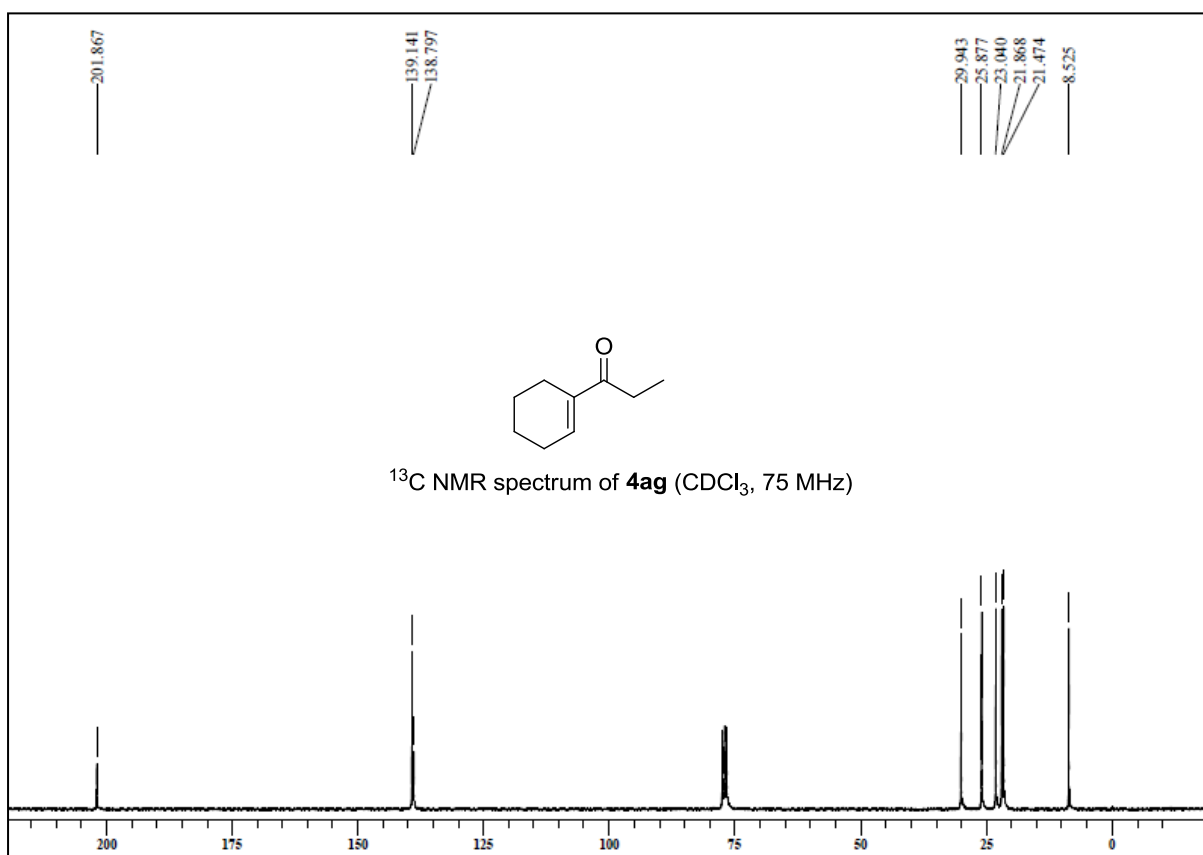

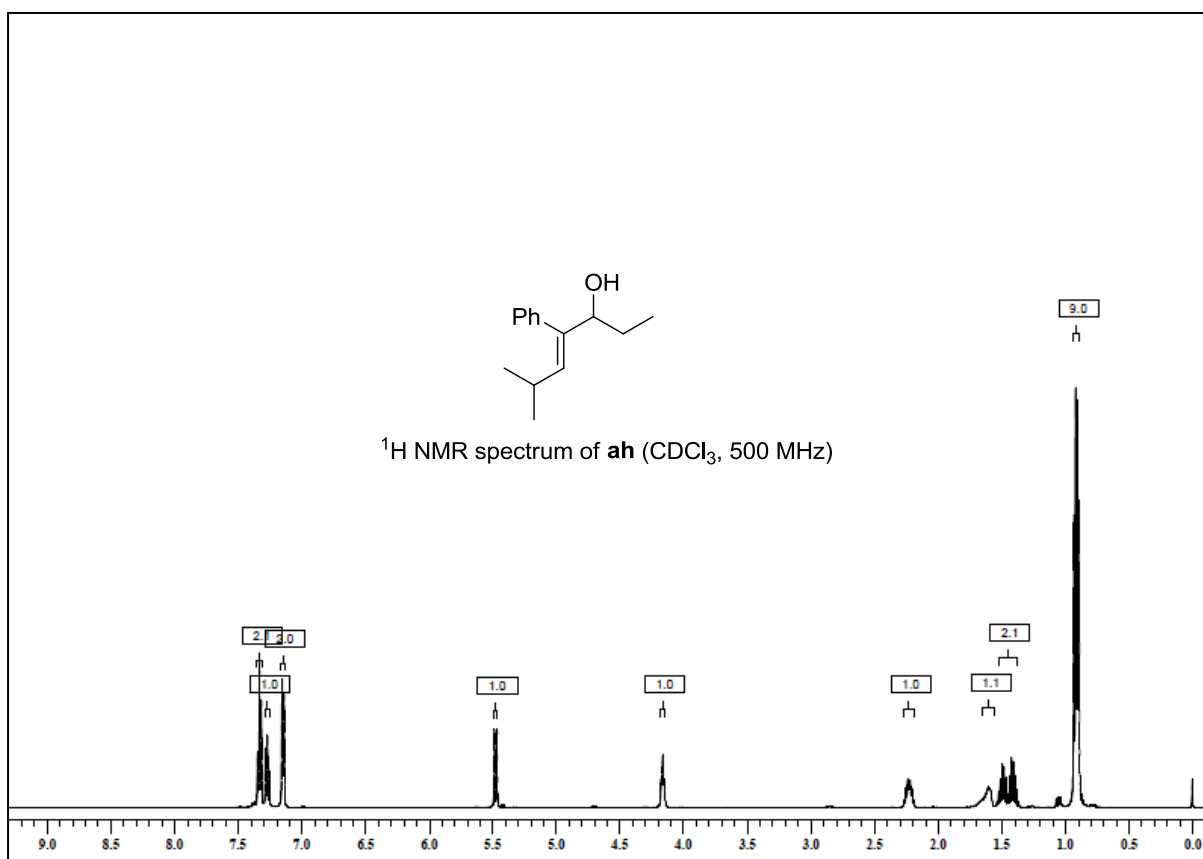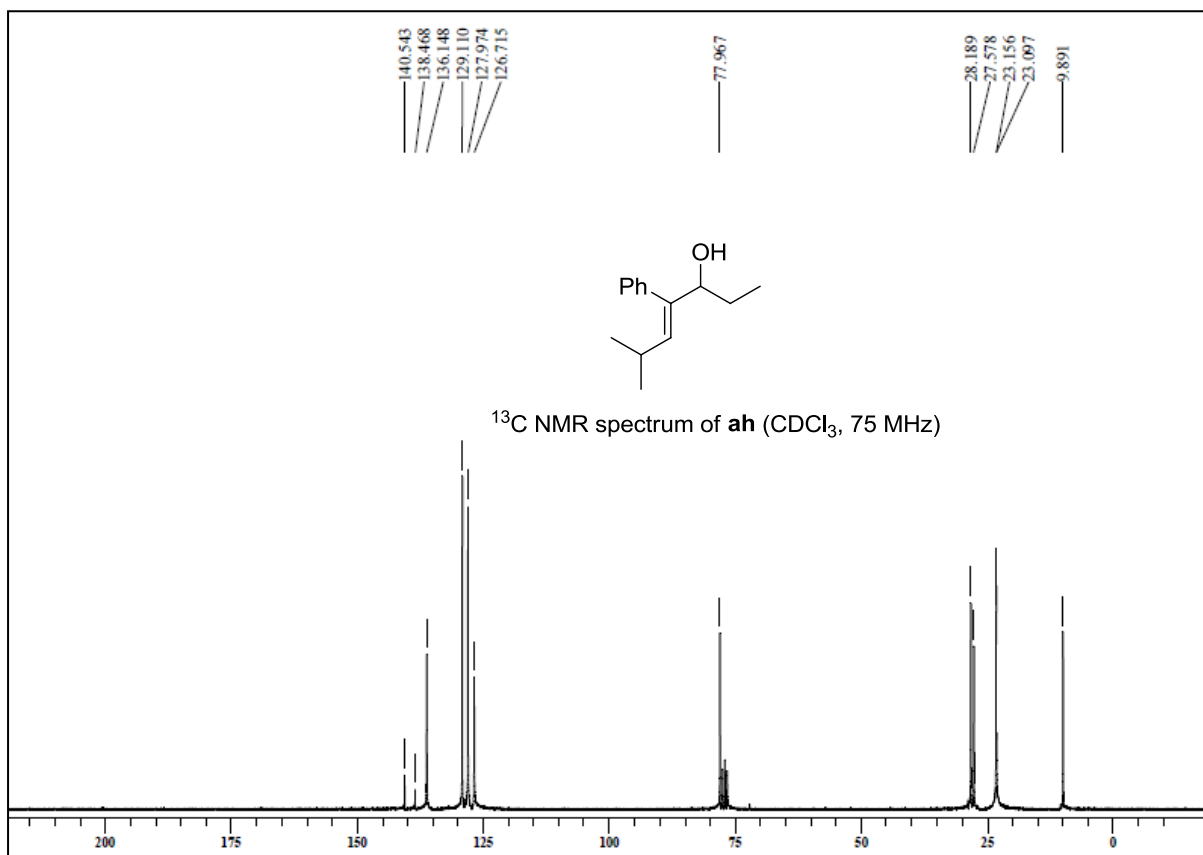

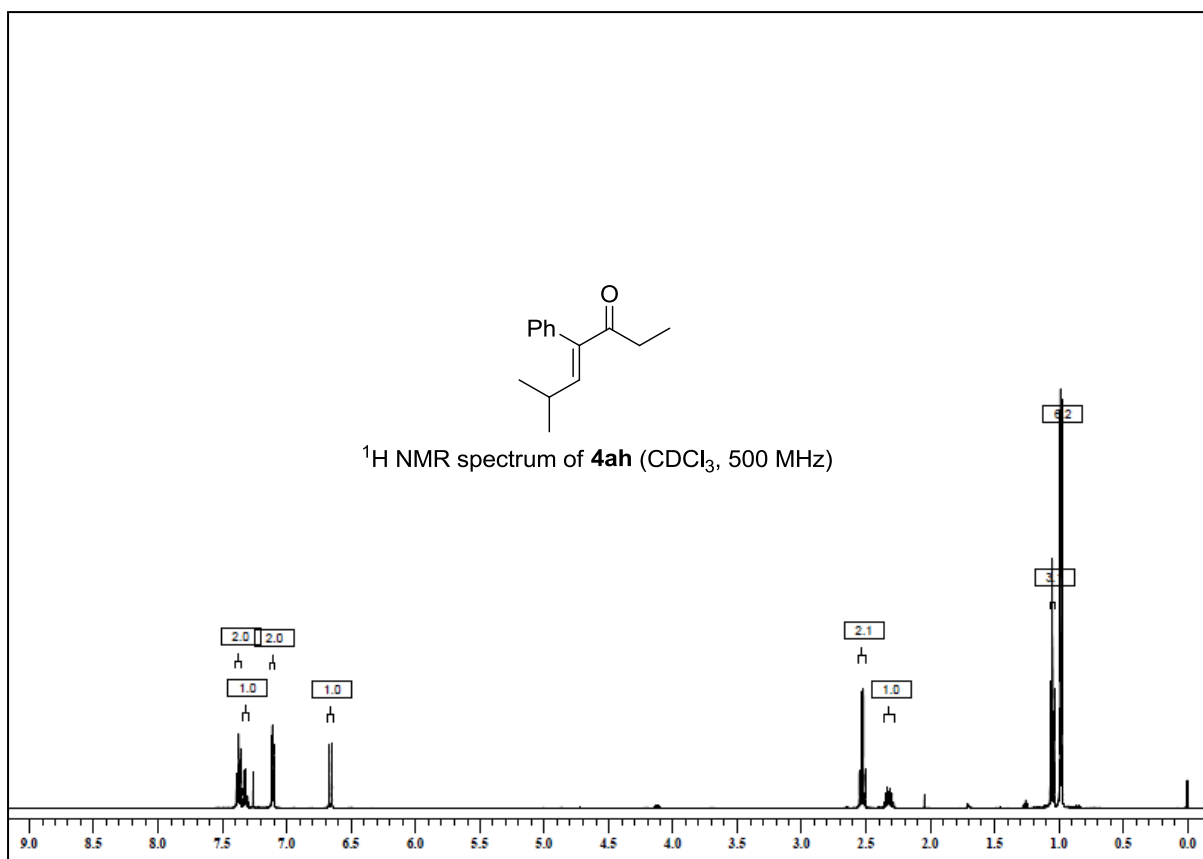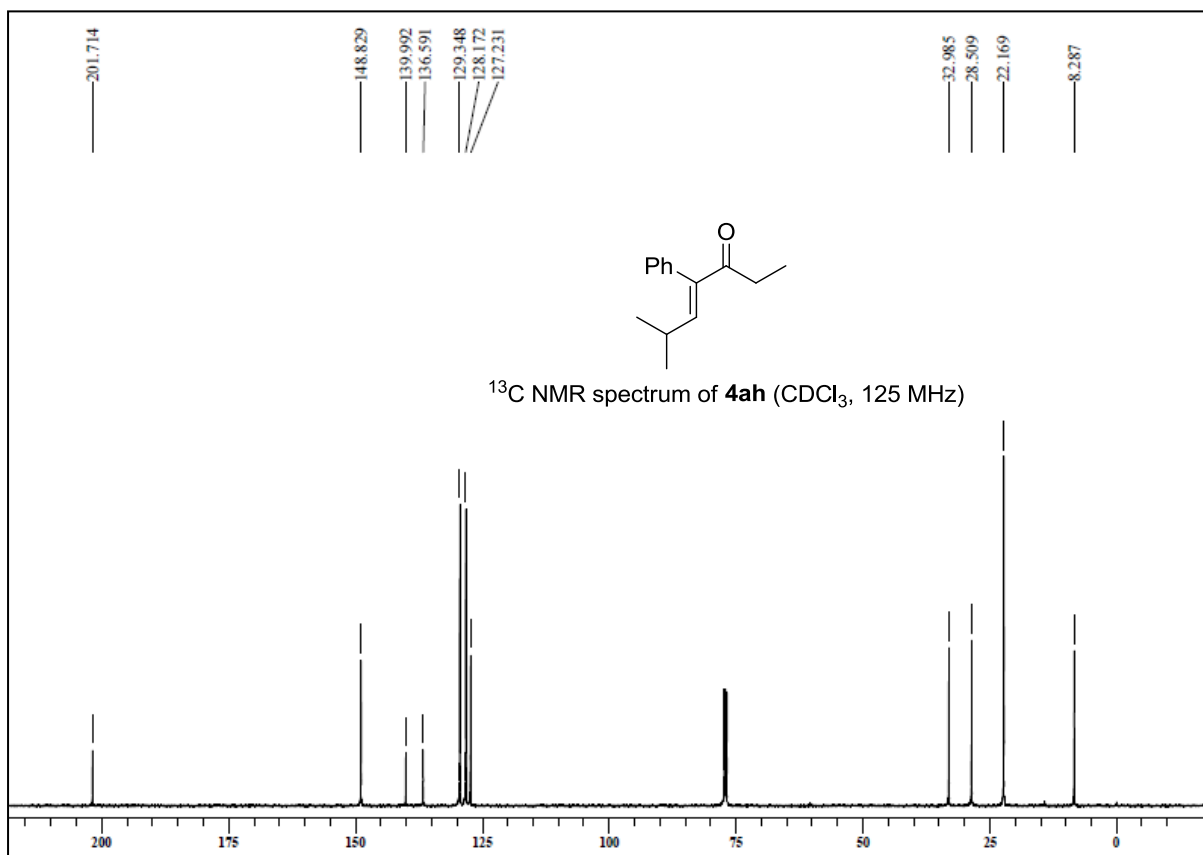

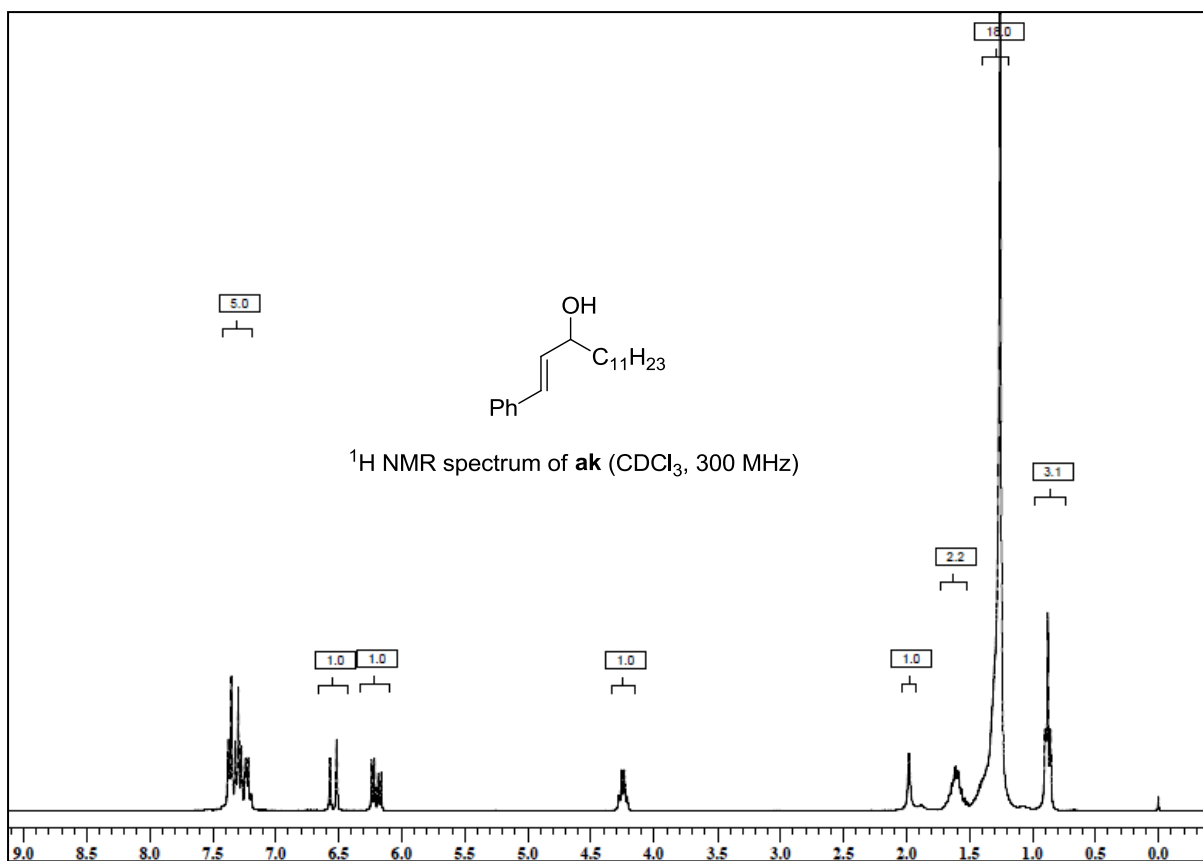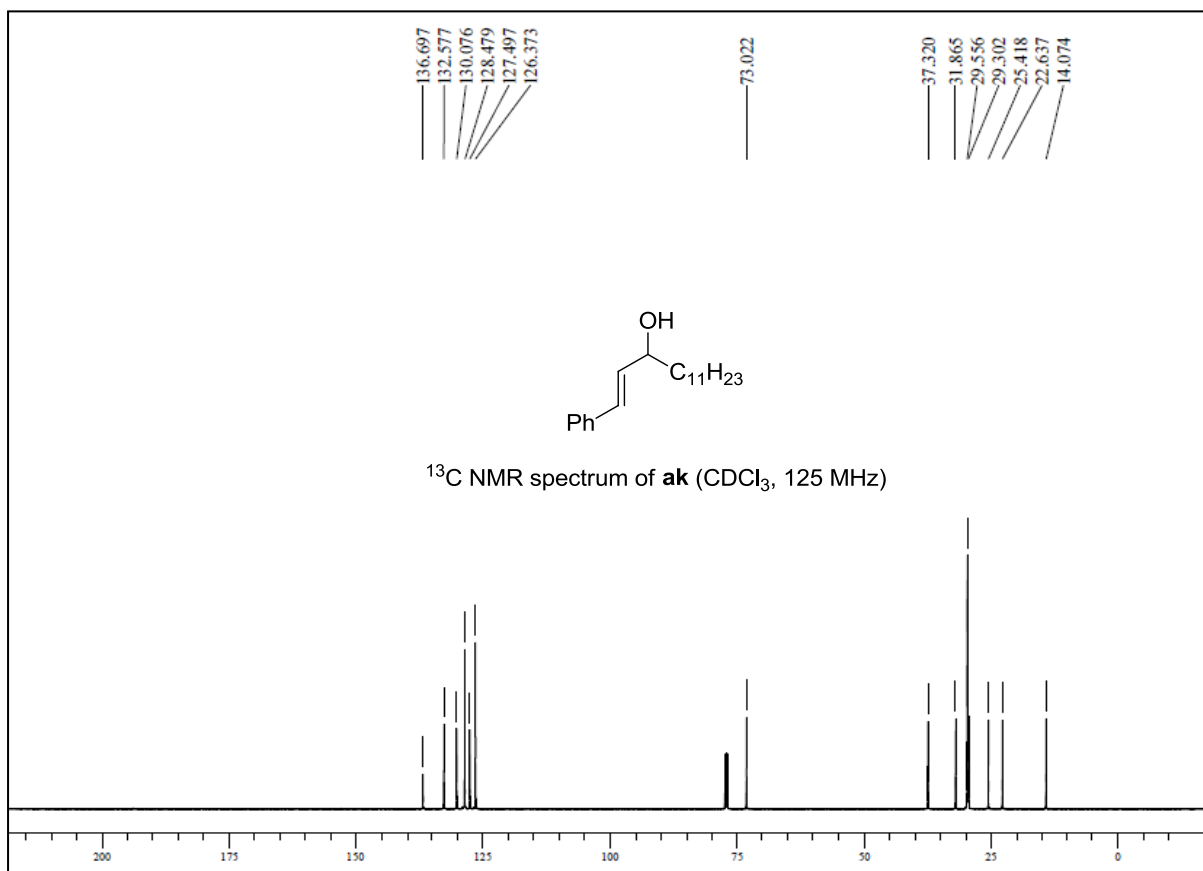

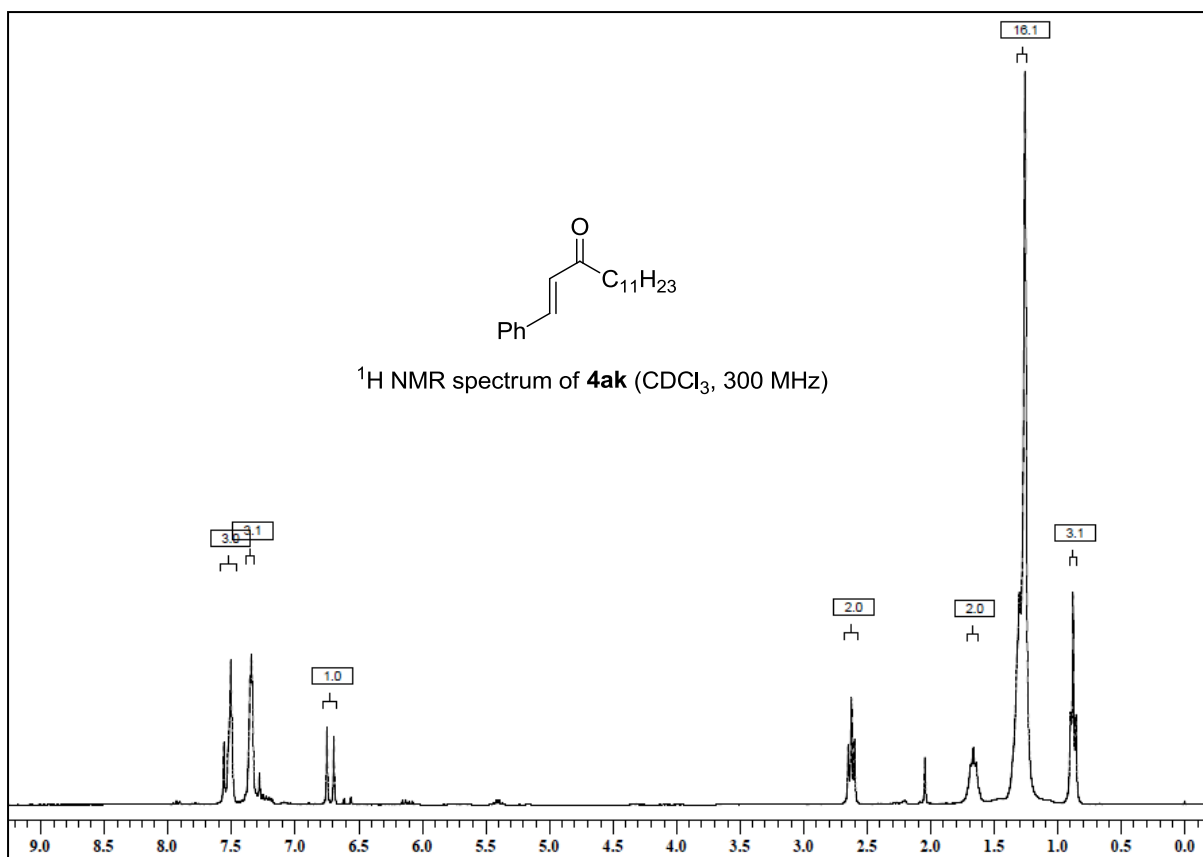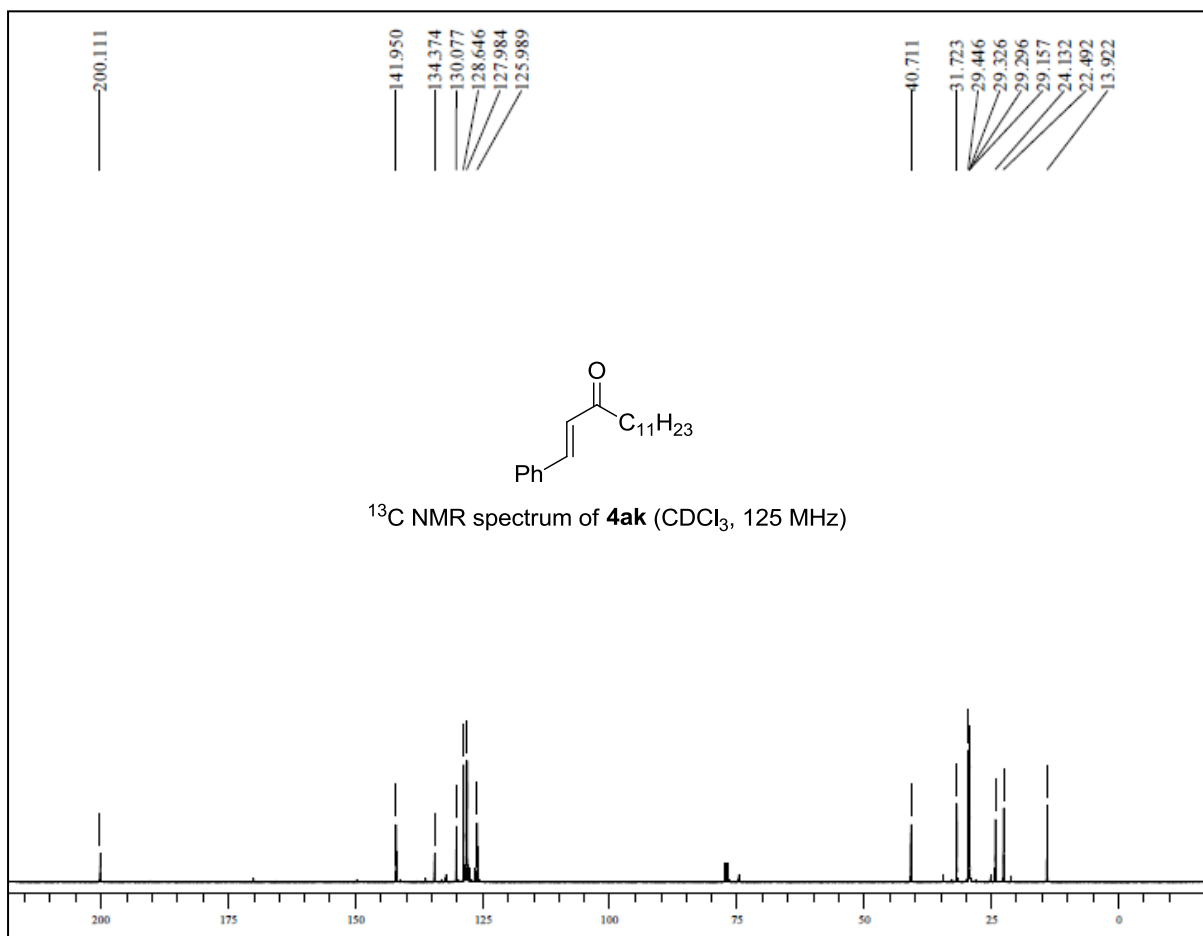

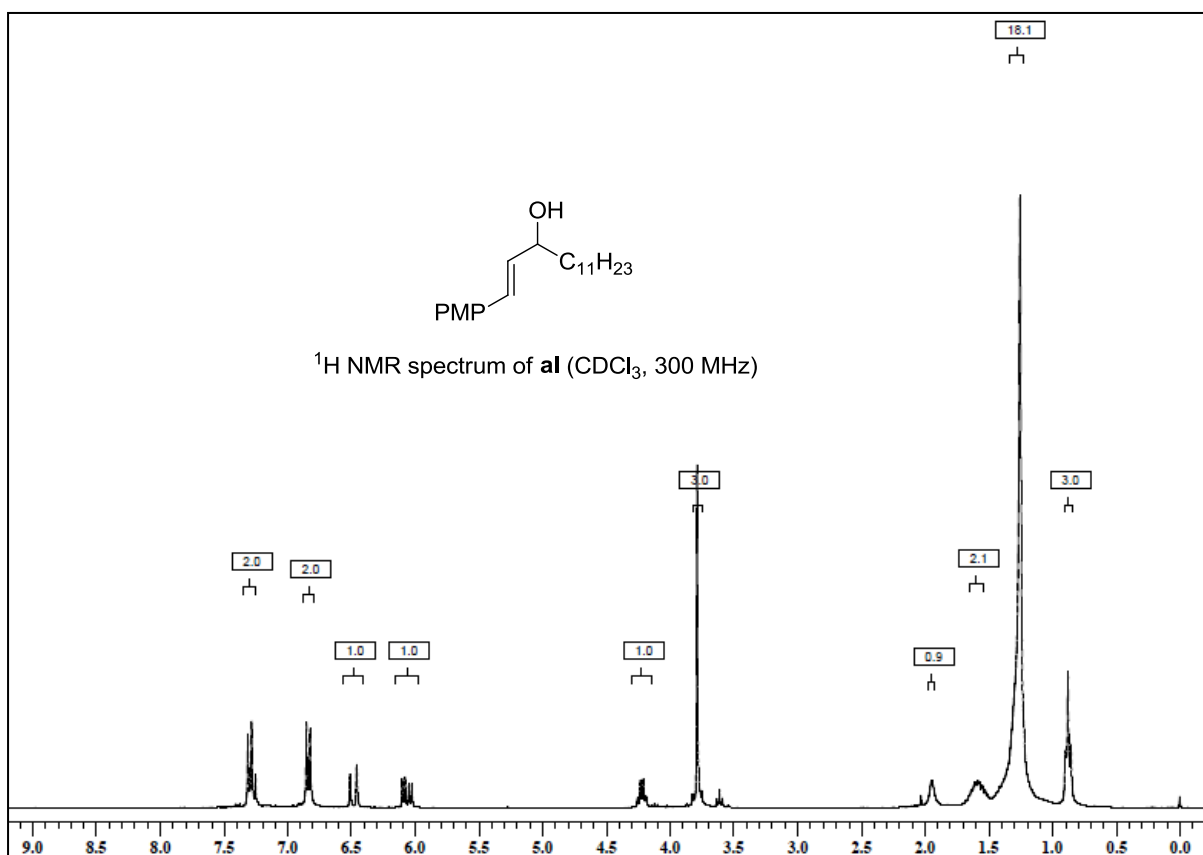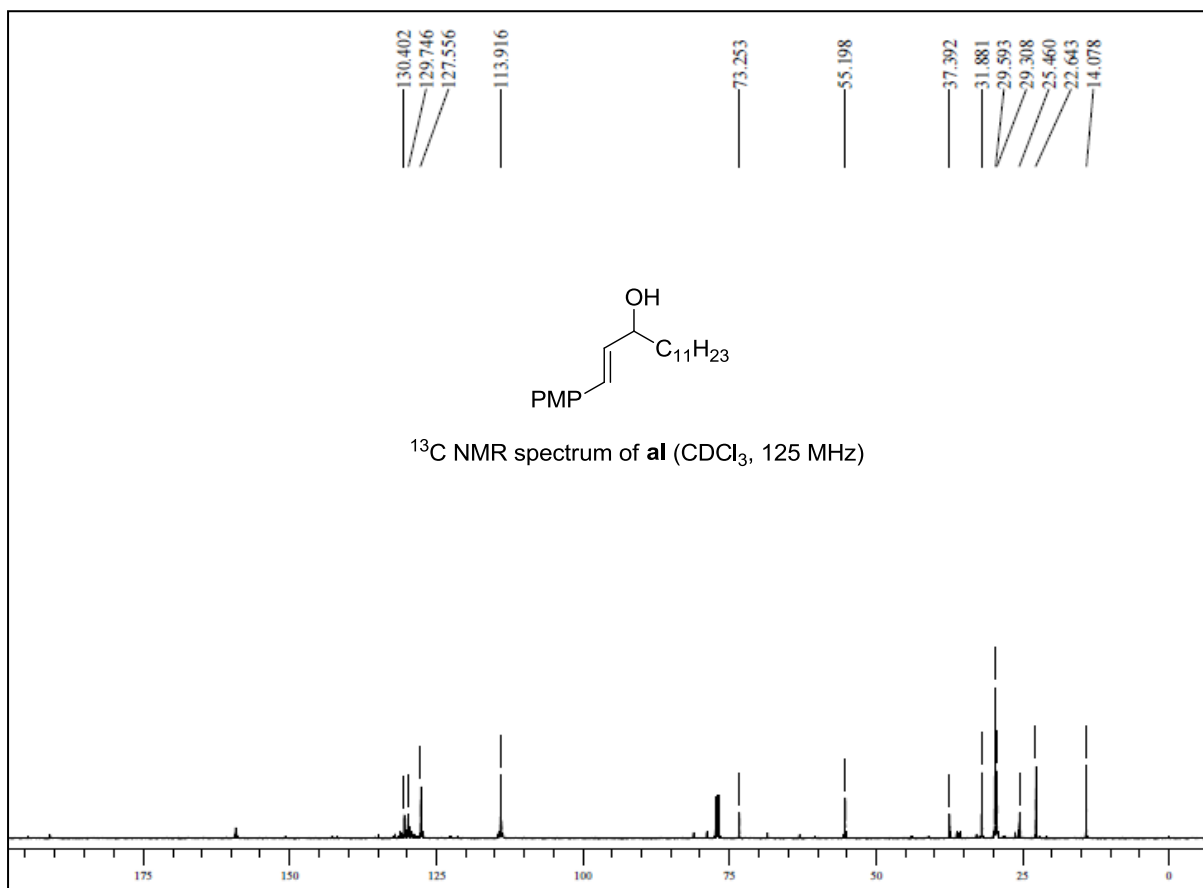

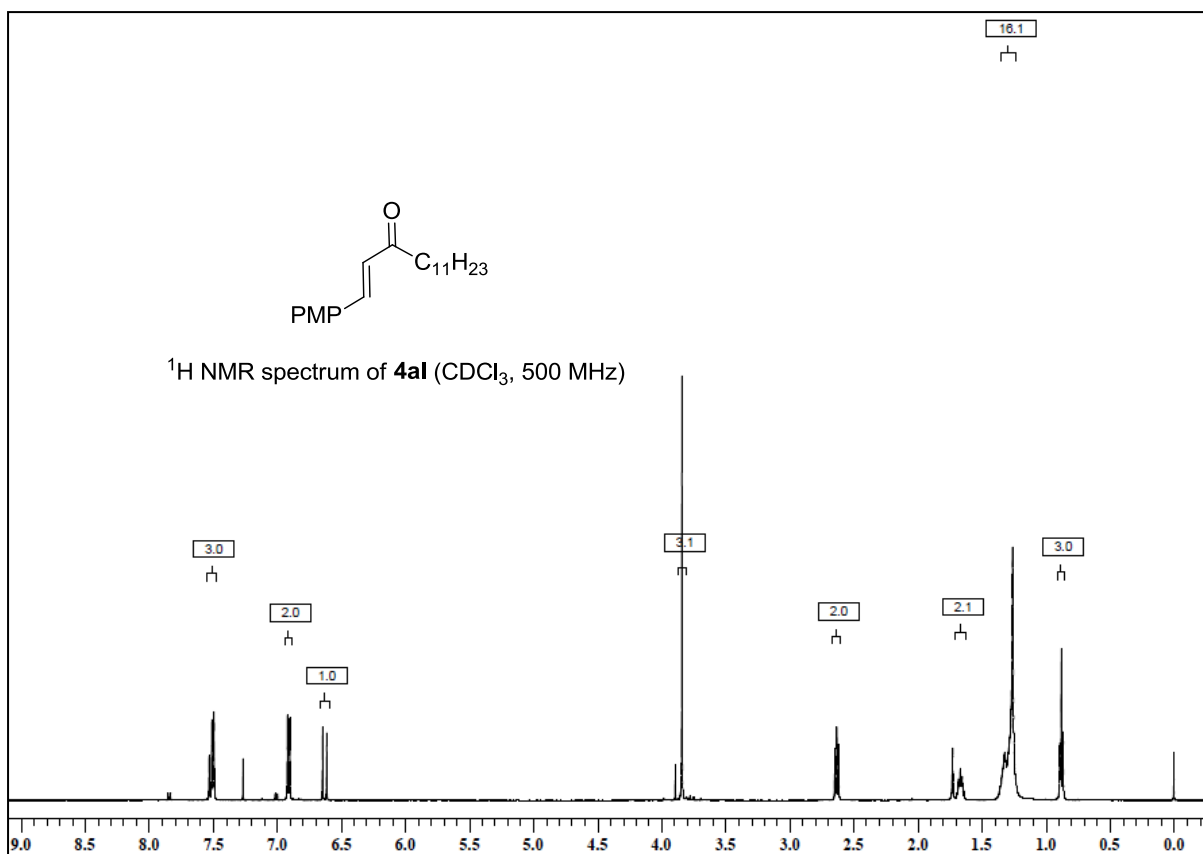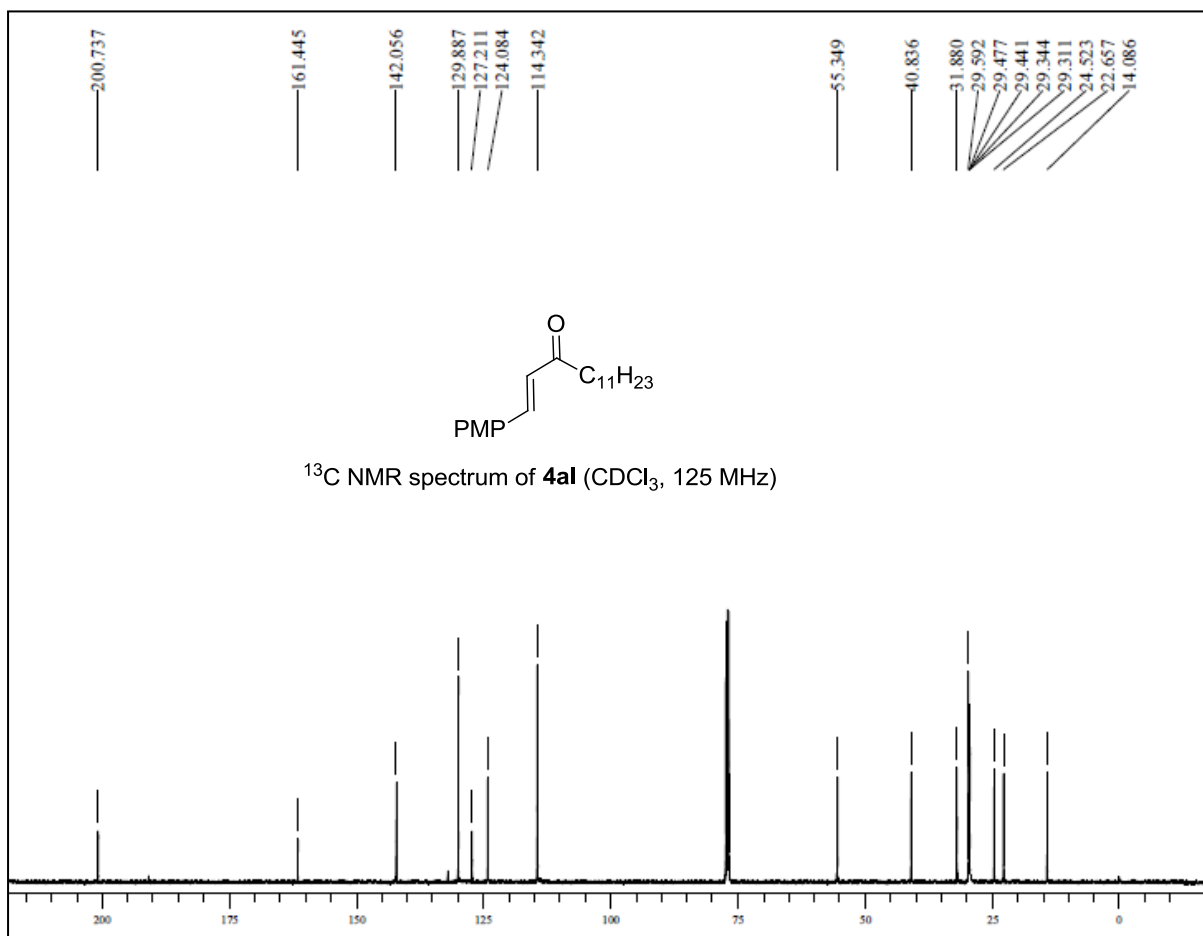



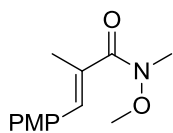

$^1\text{H}$  NMR spectrum of **b** ( $\text{CDCl}_3$ , 500 MHz)

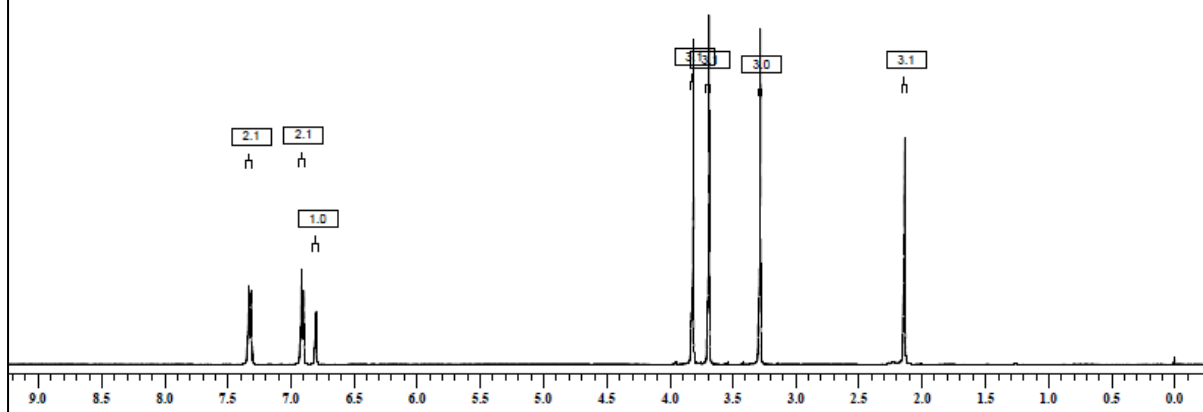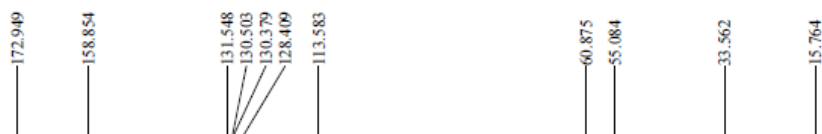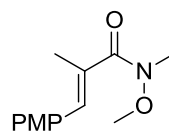

$^{13}\text{C}$  NMR spectrum of **b** ( $\text{CDCl}_3$ , 125 MHz)

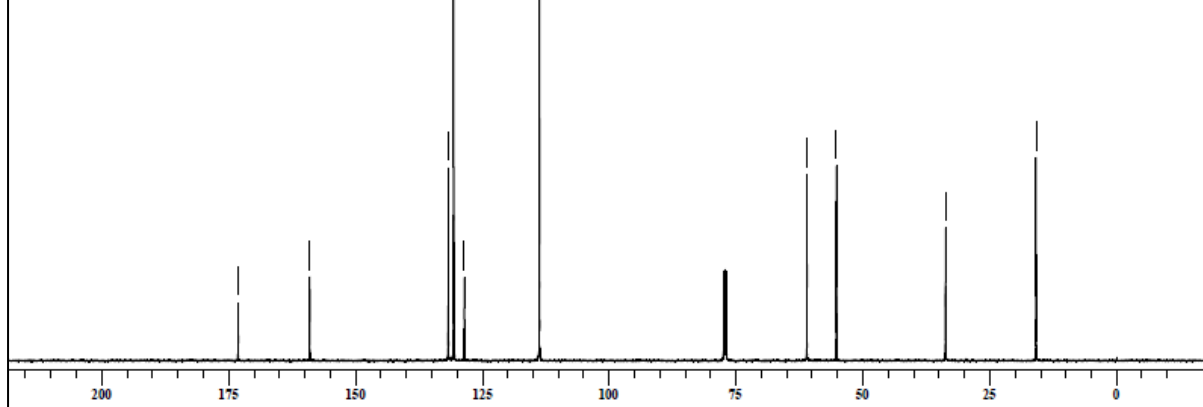

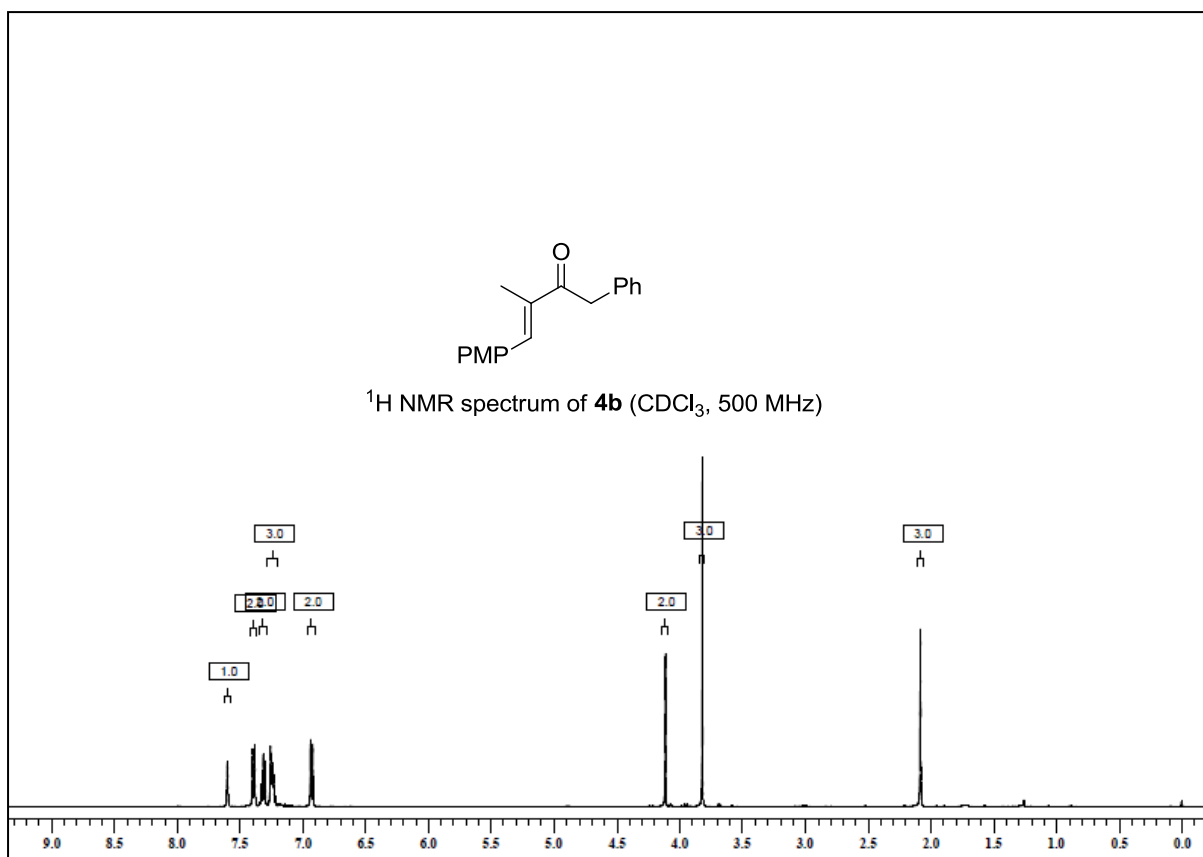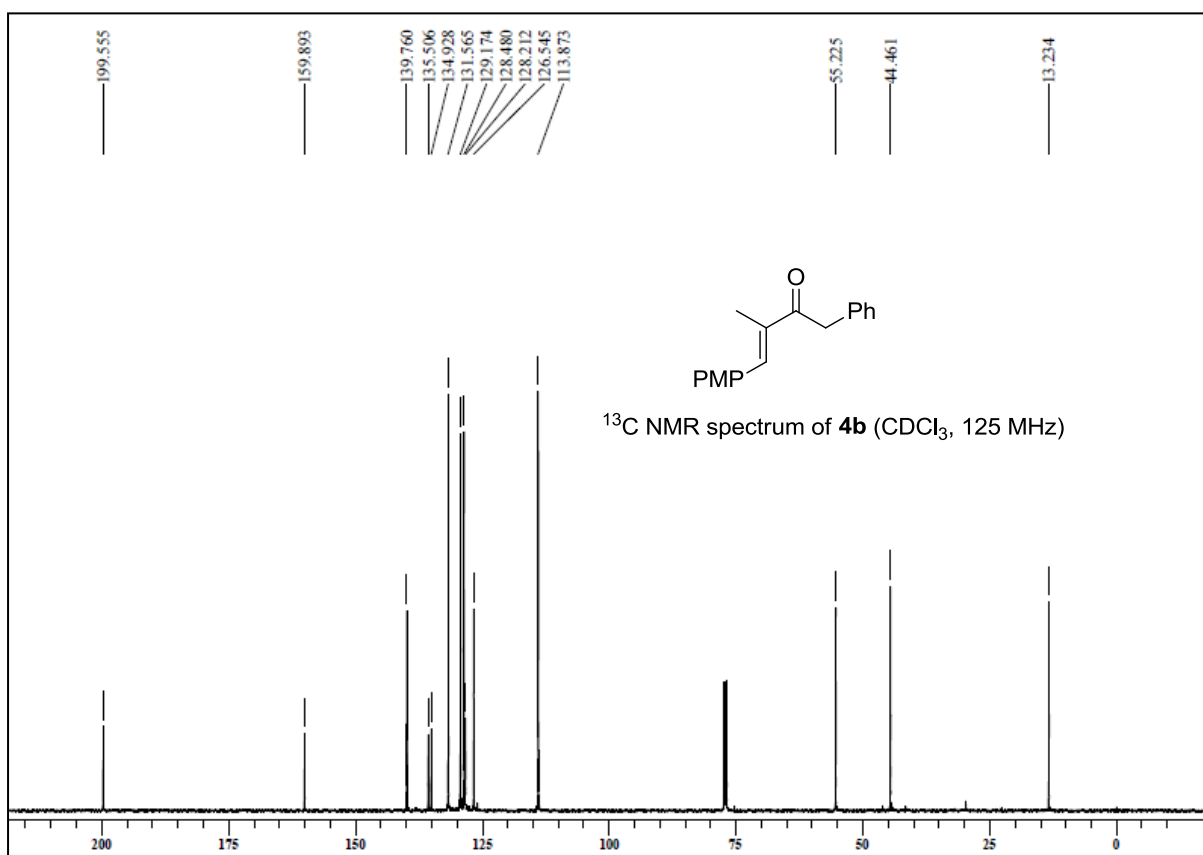

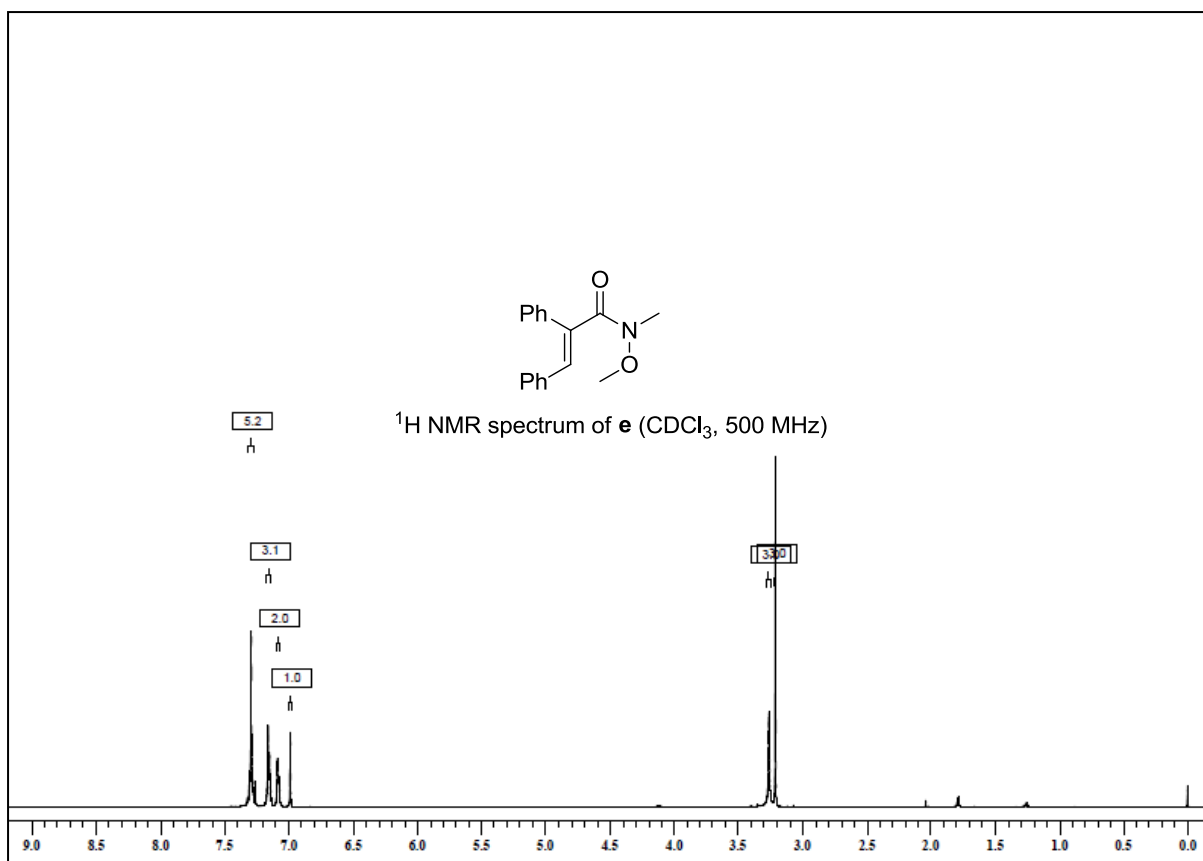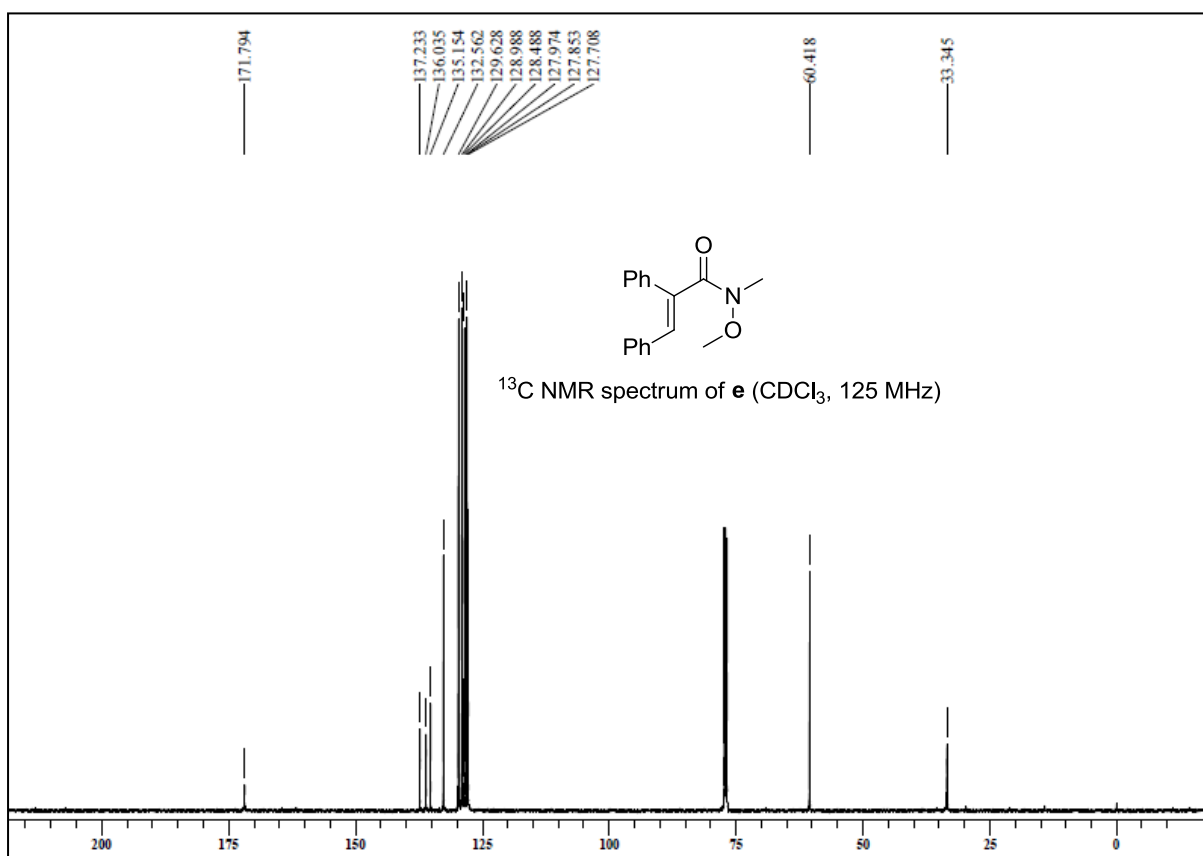

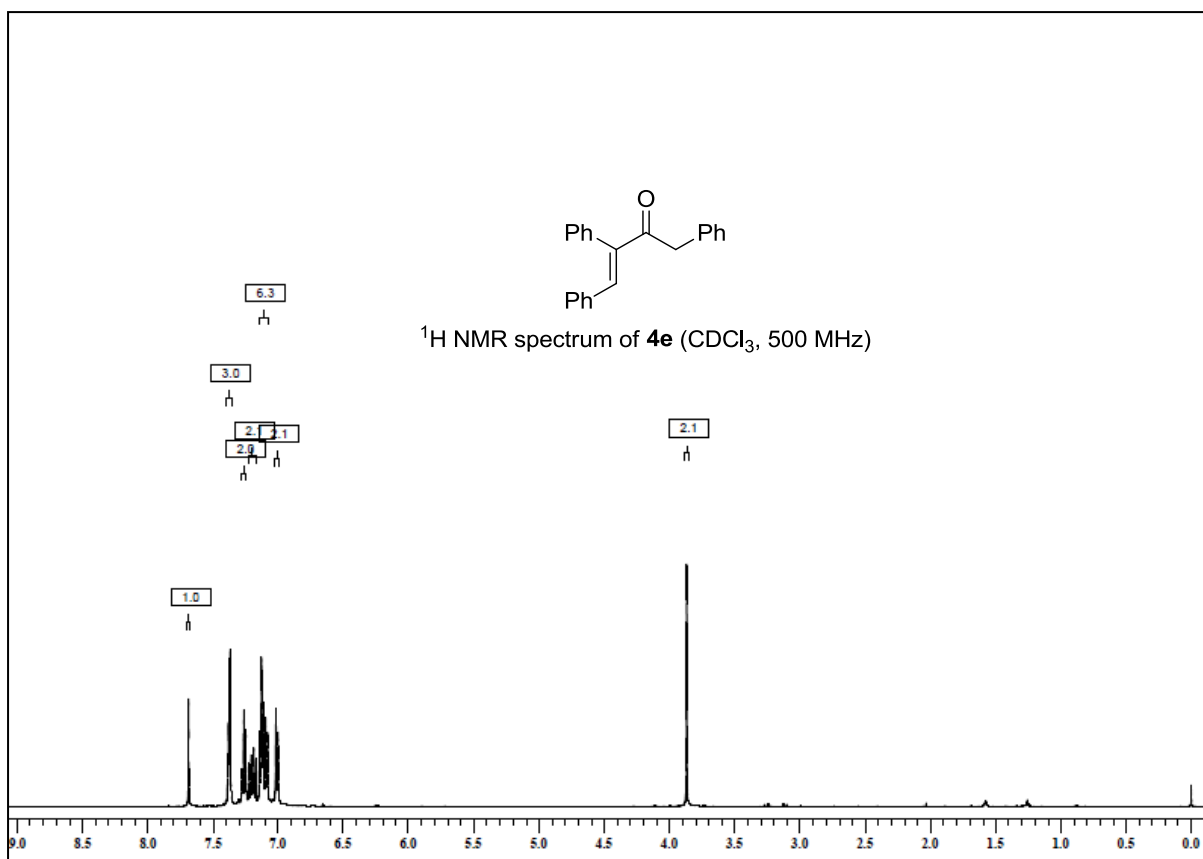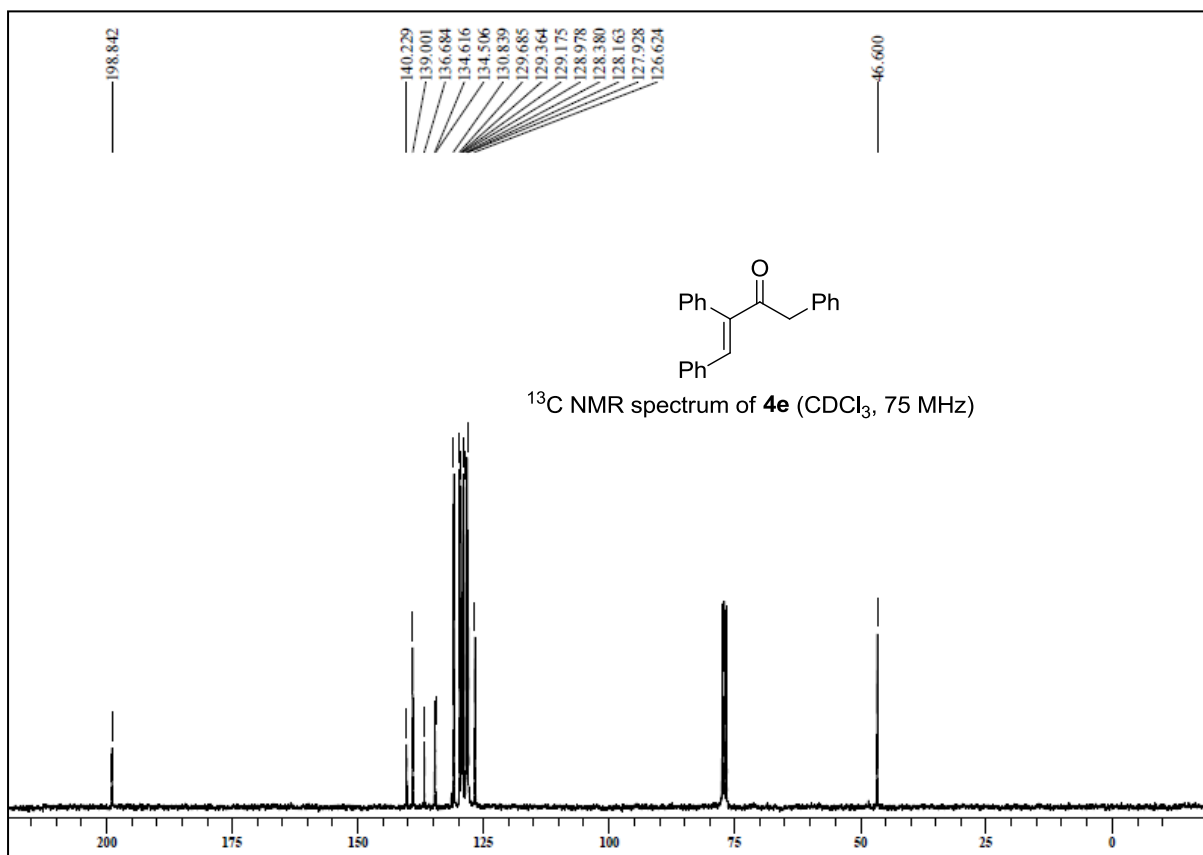

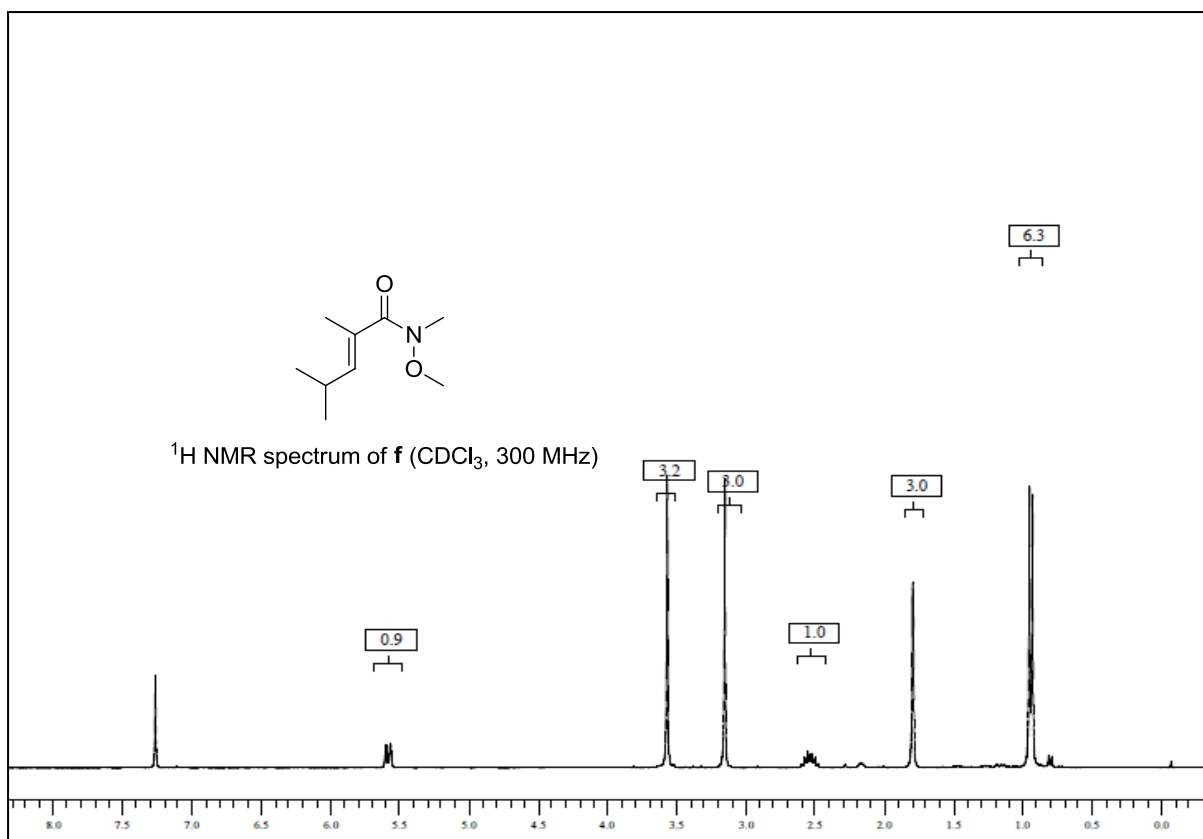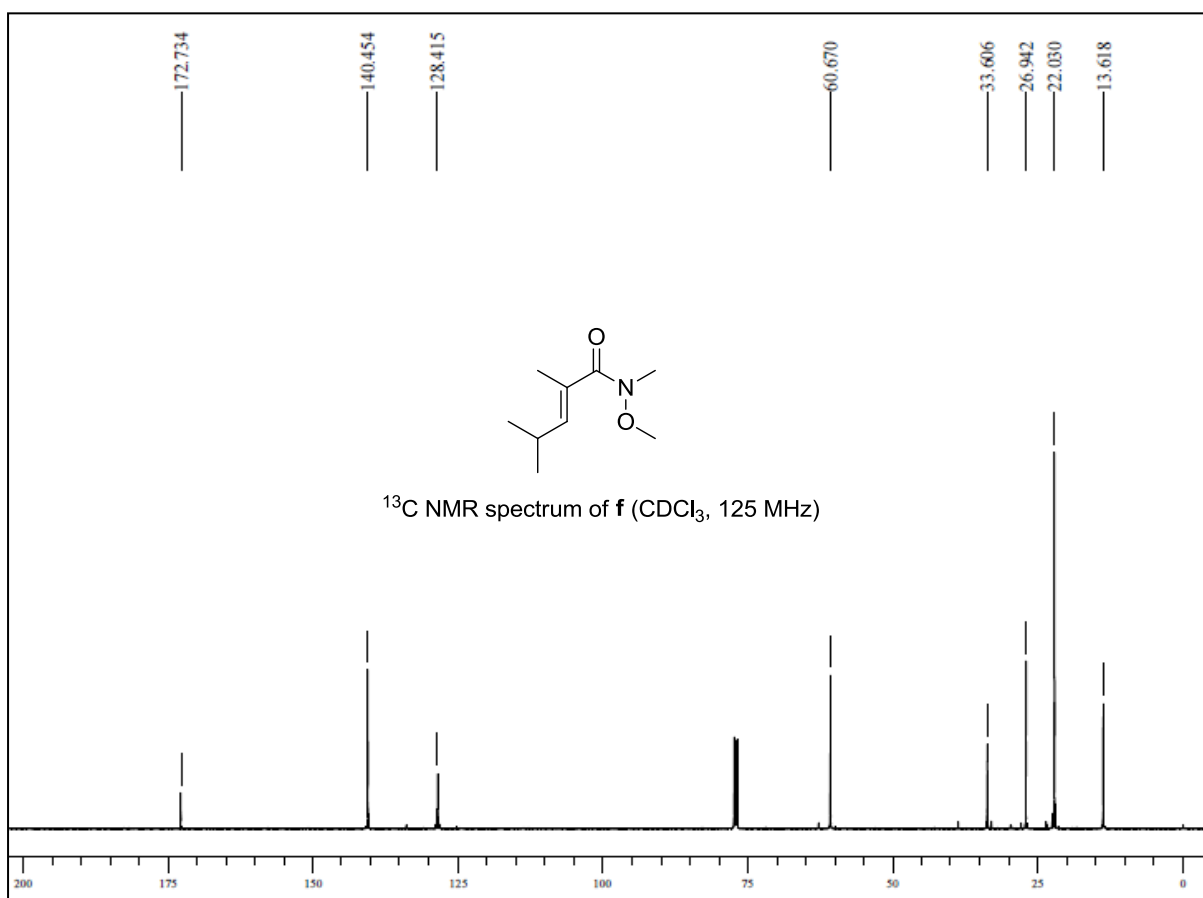

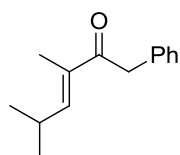

$^1\text{H}$  NMR spectrum of **4f** ( $\text{CDCl}_3$ , 500 MHz)

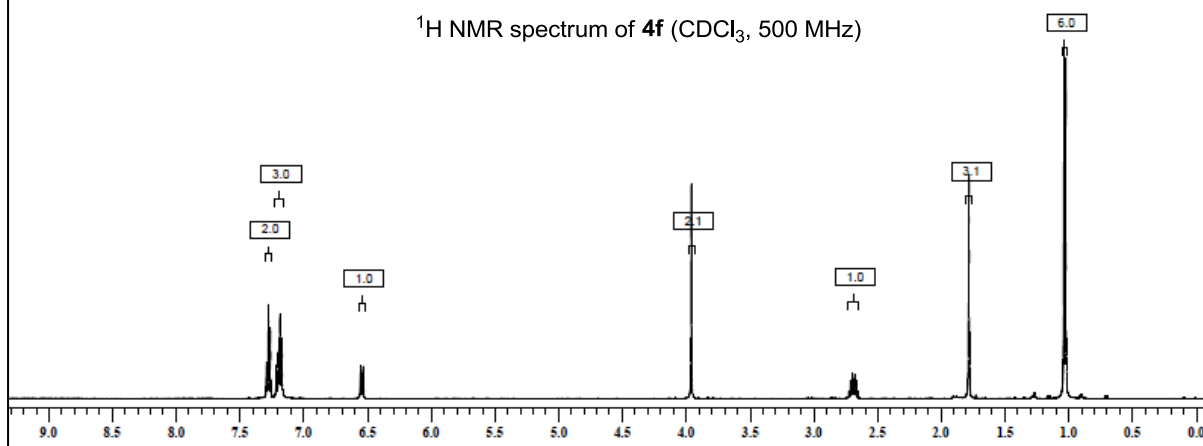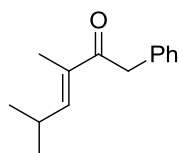

$^{13}\text{C}$  NMR spectrum of **4f** ( $\text{CDCl}_3$ , 75 MHz)

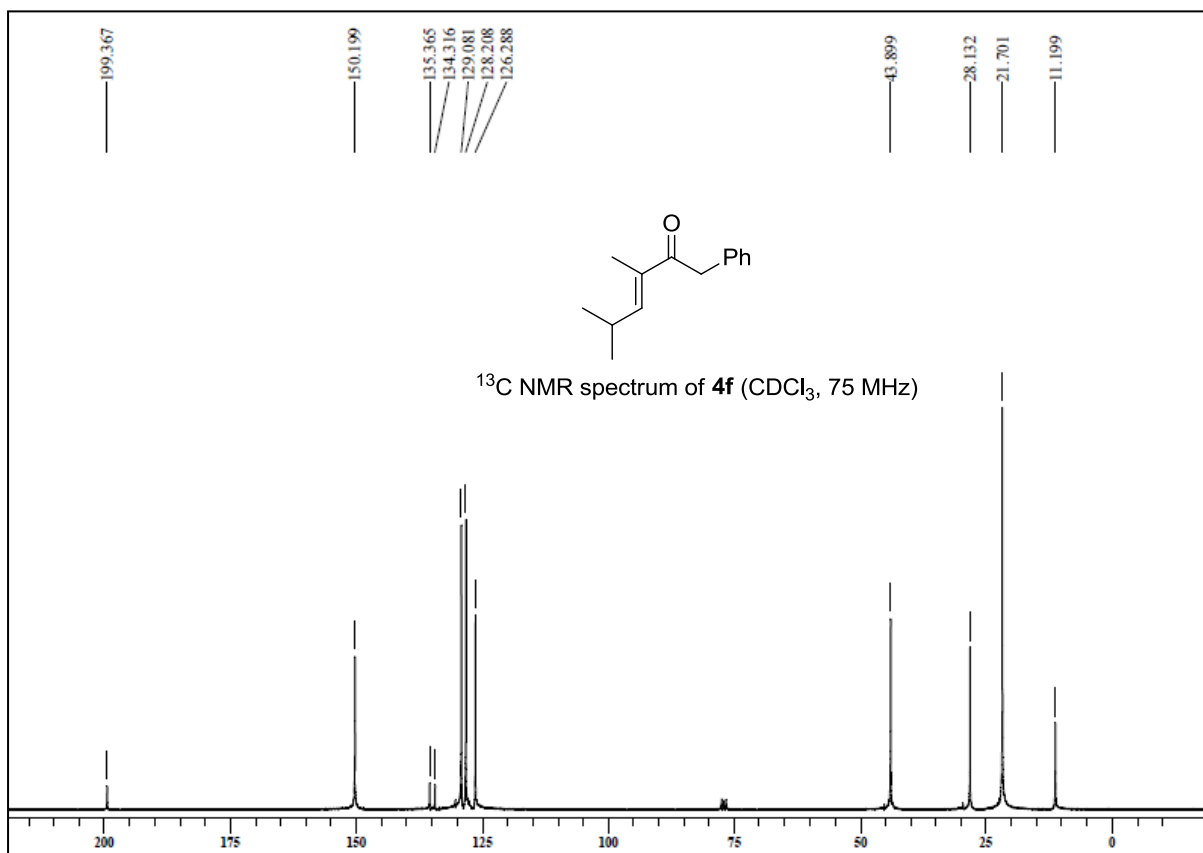

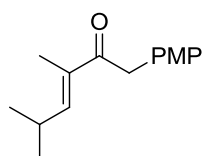

$^1\text{H}$  NMR spectrum of **4I** ( $\text{CDCl}_3$ , 300 MHz)

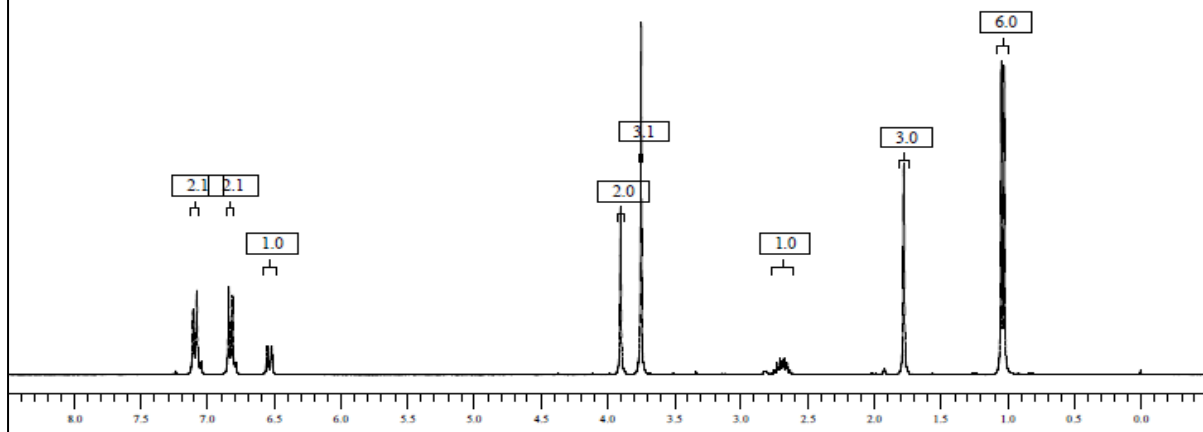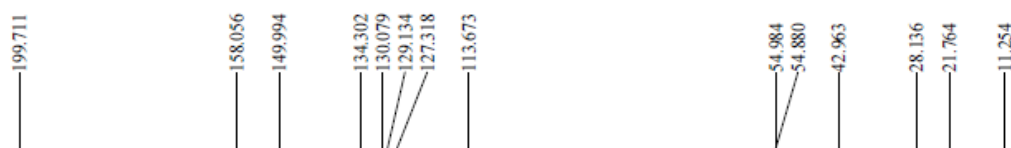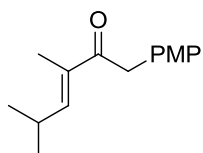

$^{13}\text{C}$  NMR spectrum of **4I** ( $\text{CDCl}_3$ , 75 MHz)

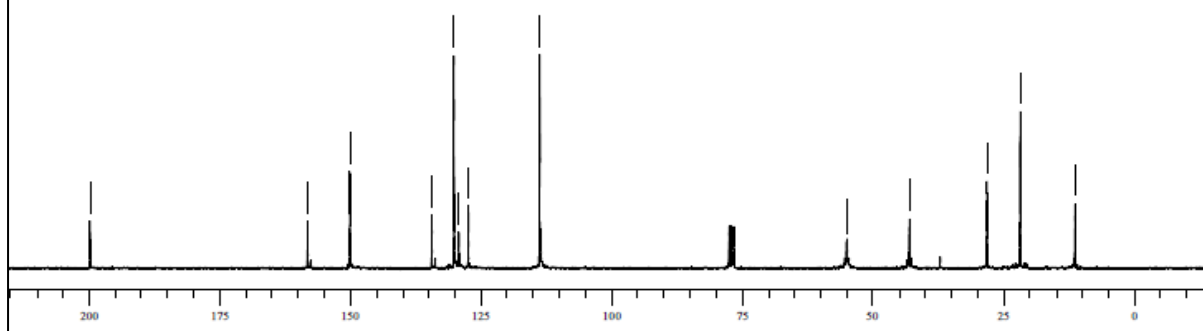

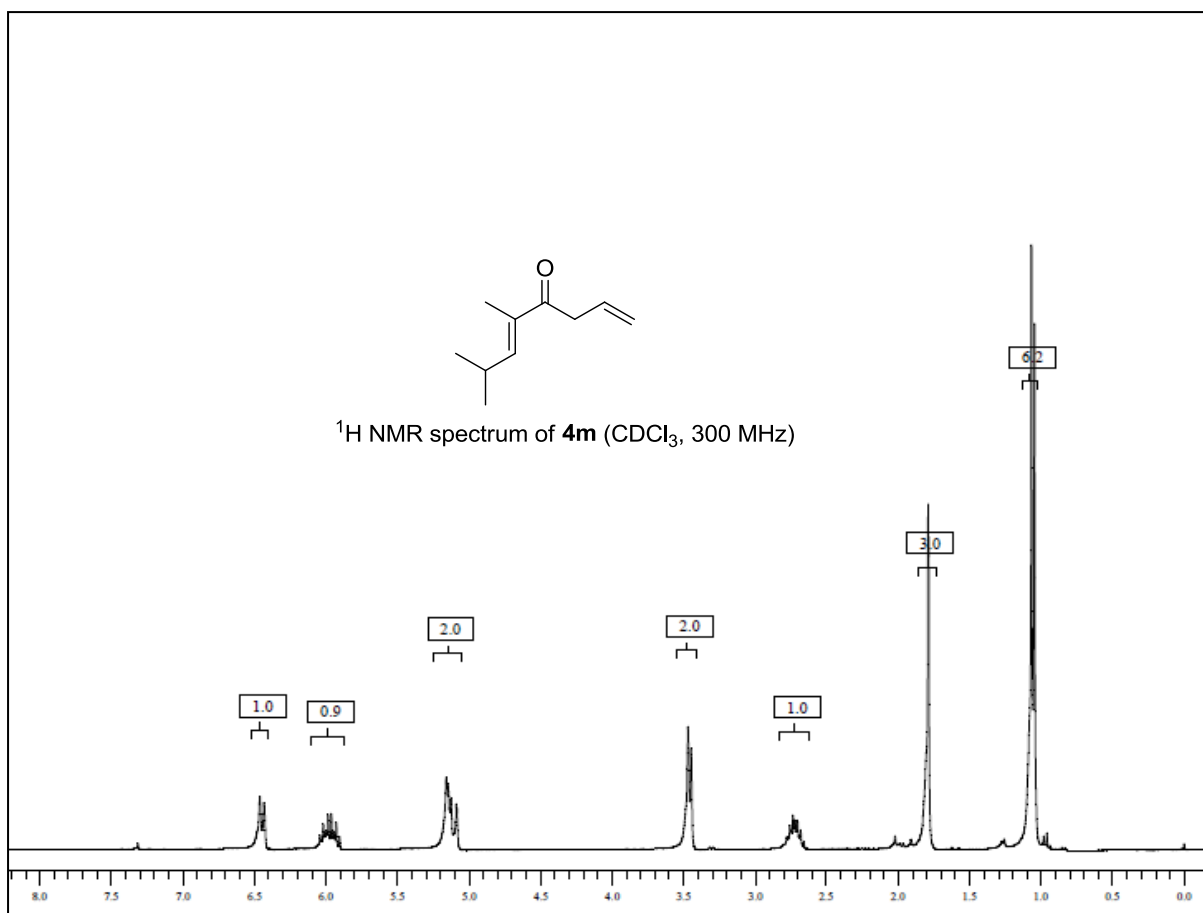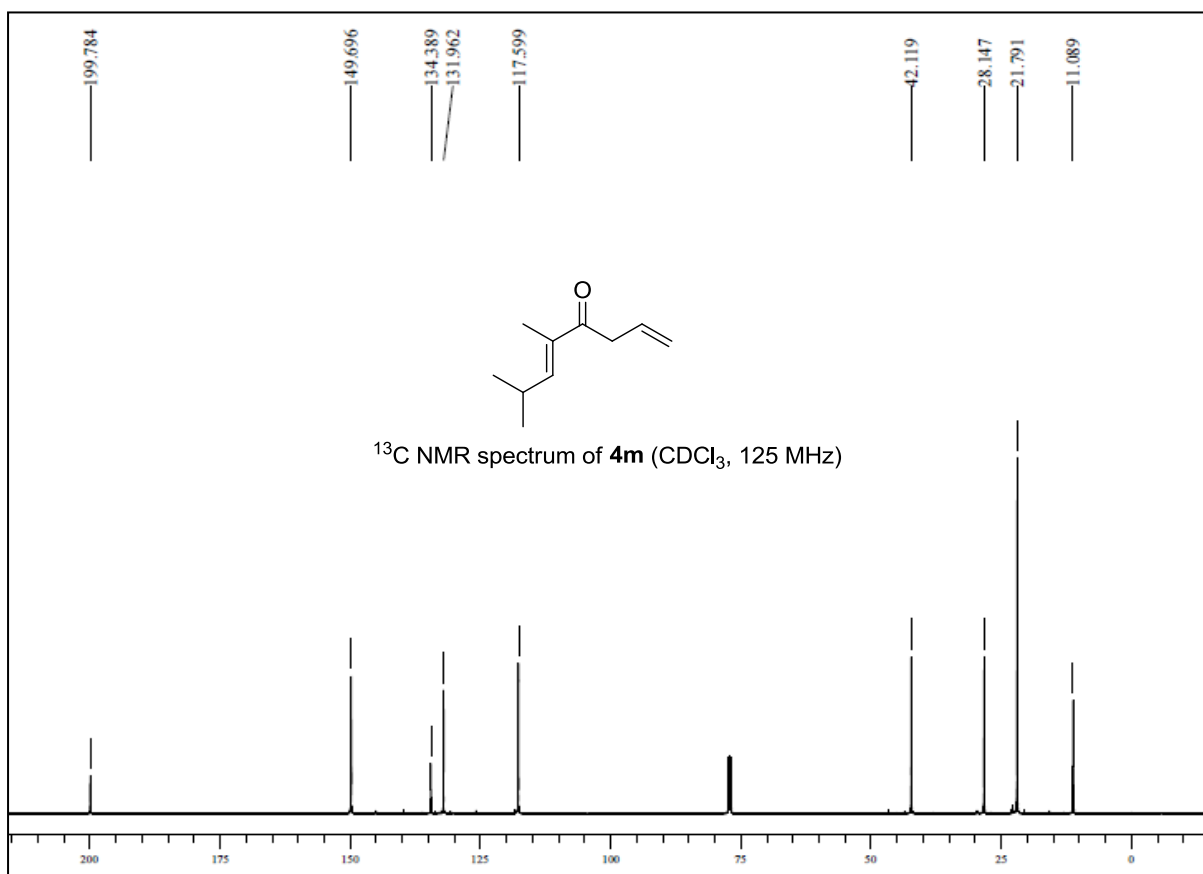



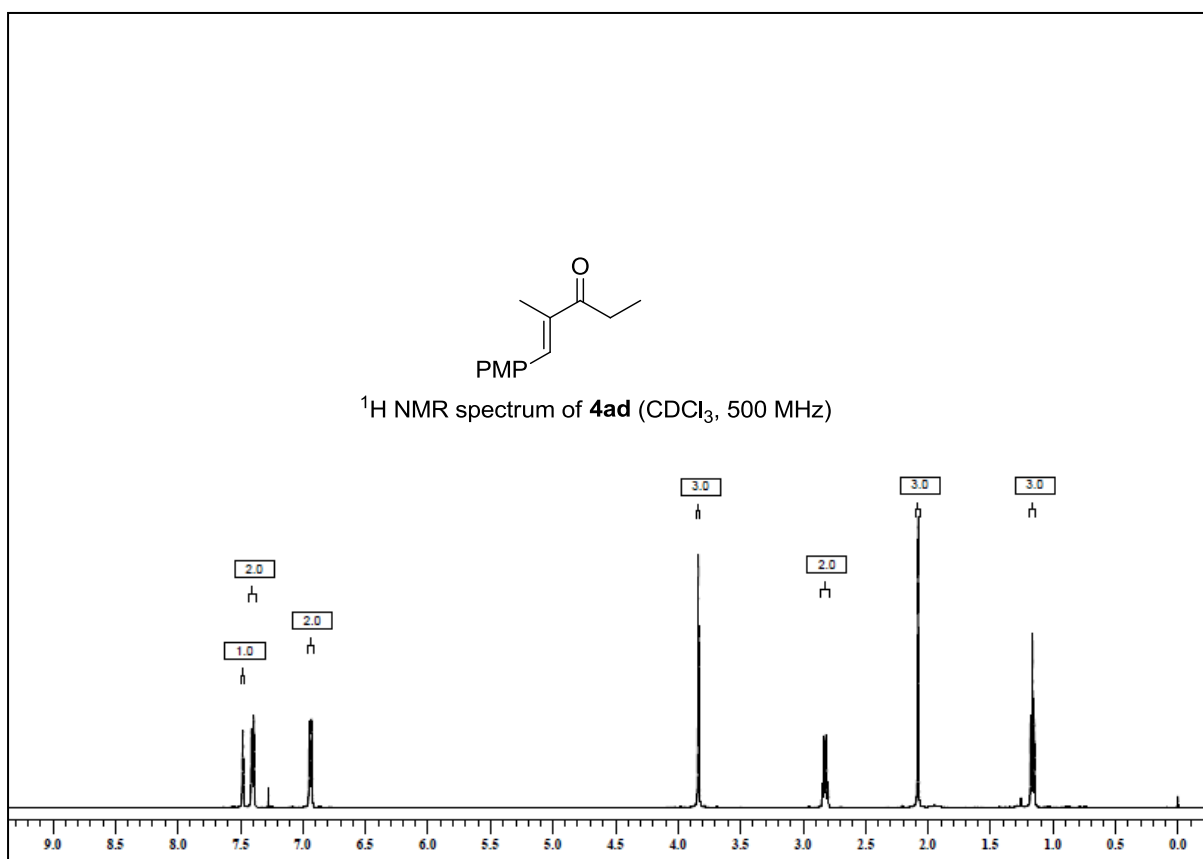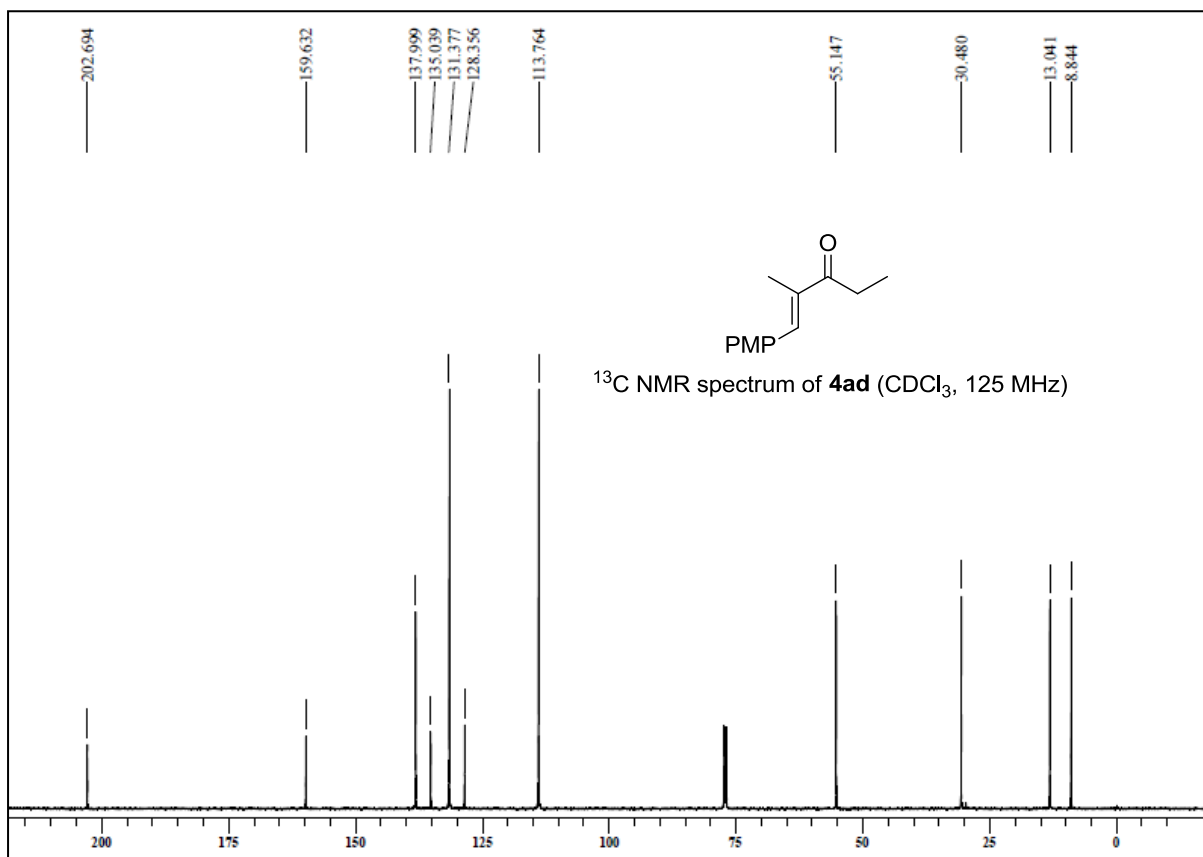

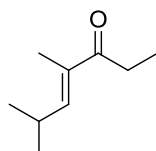

$^1\text{H}$  NMR spectrum of **4af** ( $\text{CDCl}_3$ , 500 MHz)

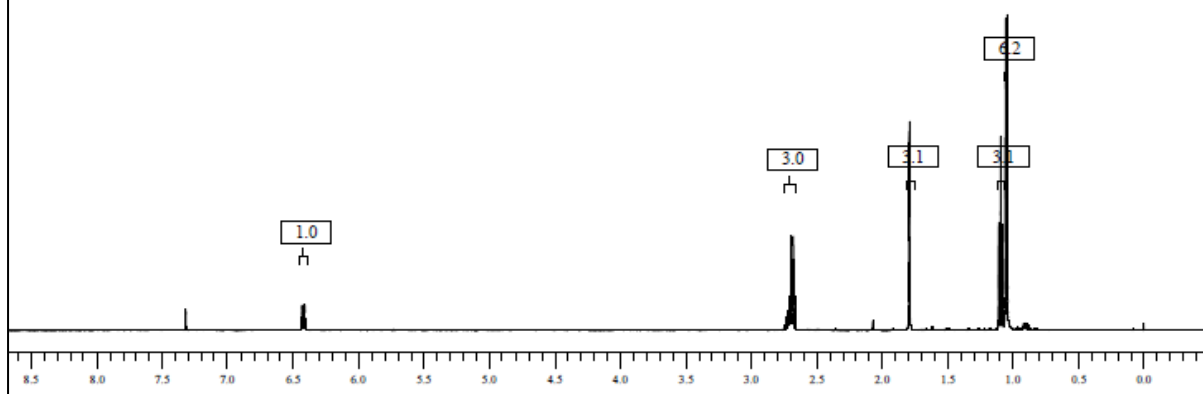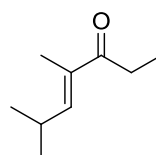

$^{13}\text{C}$  NMR spectrum of **4af** ( $\text{CDCl}_3$ , 125 MHz)

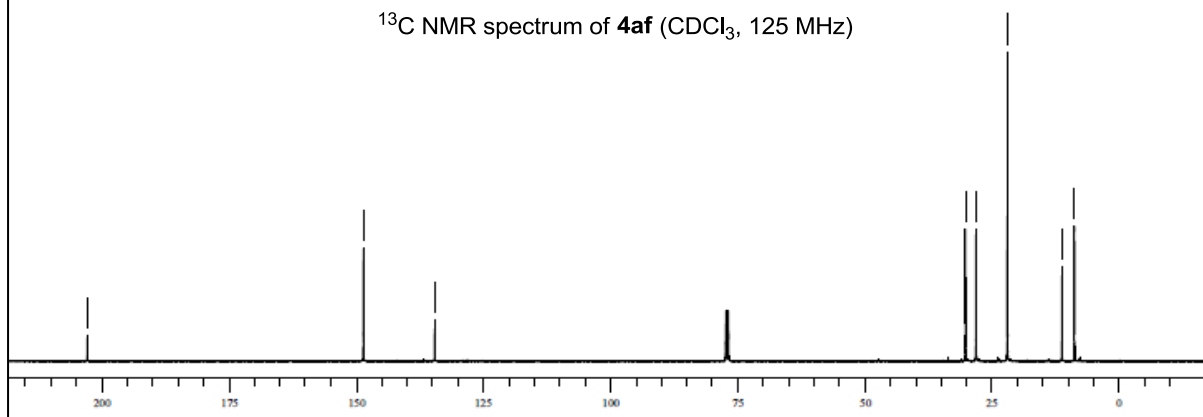

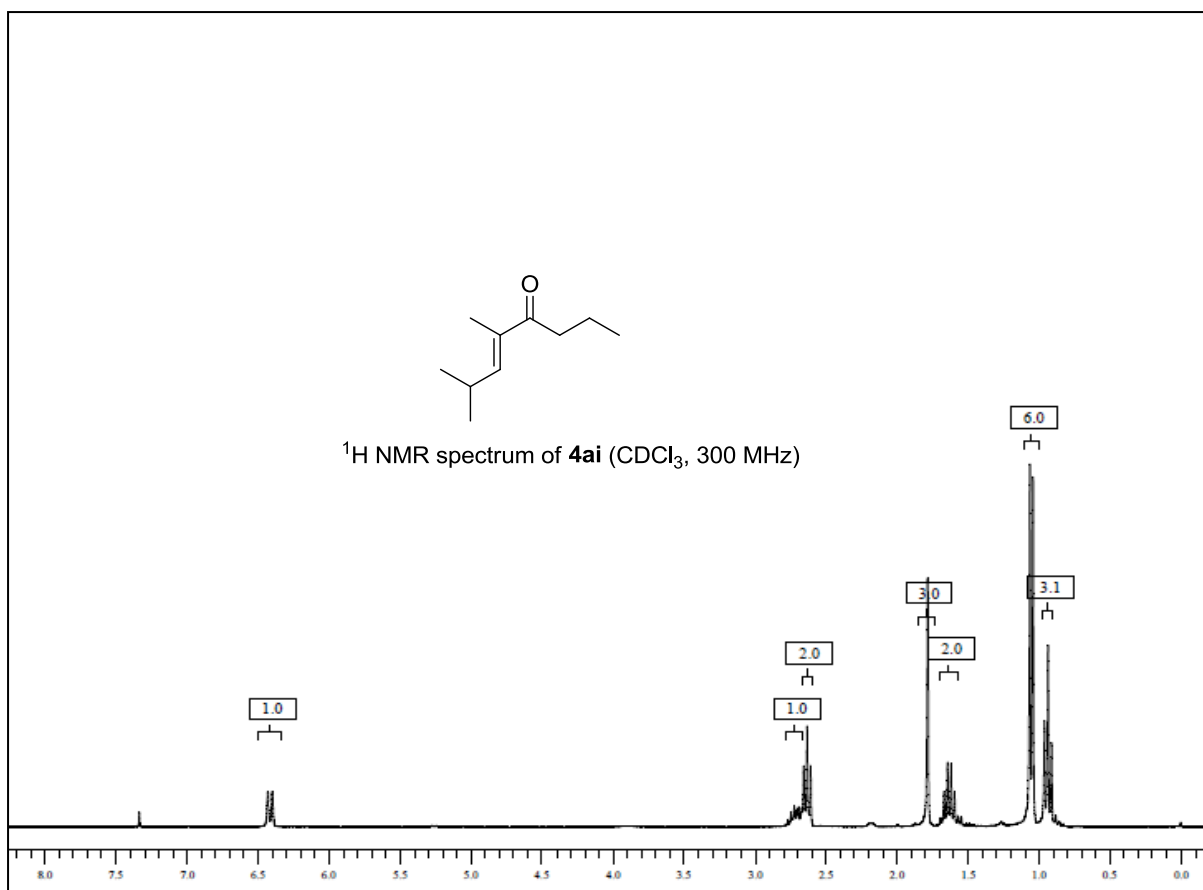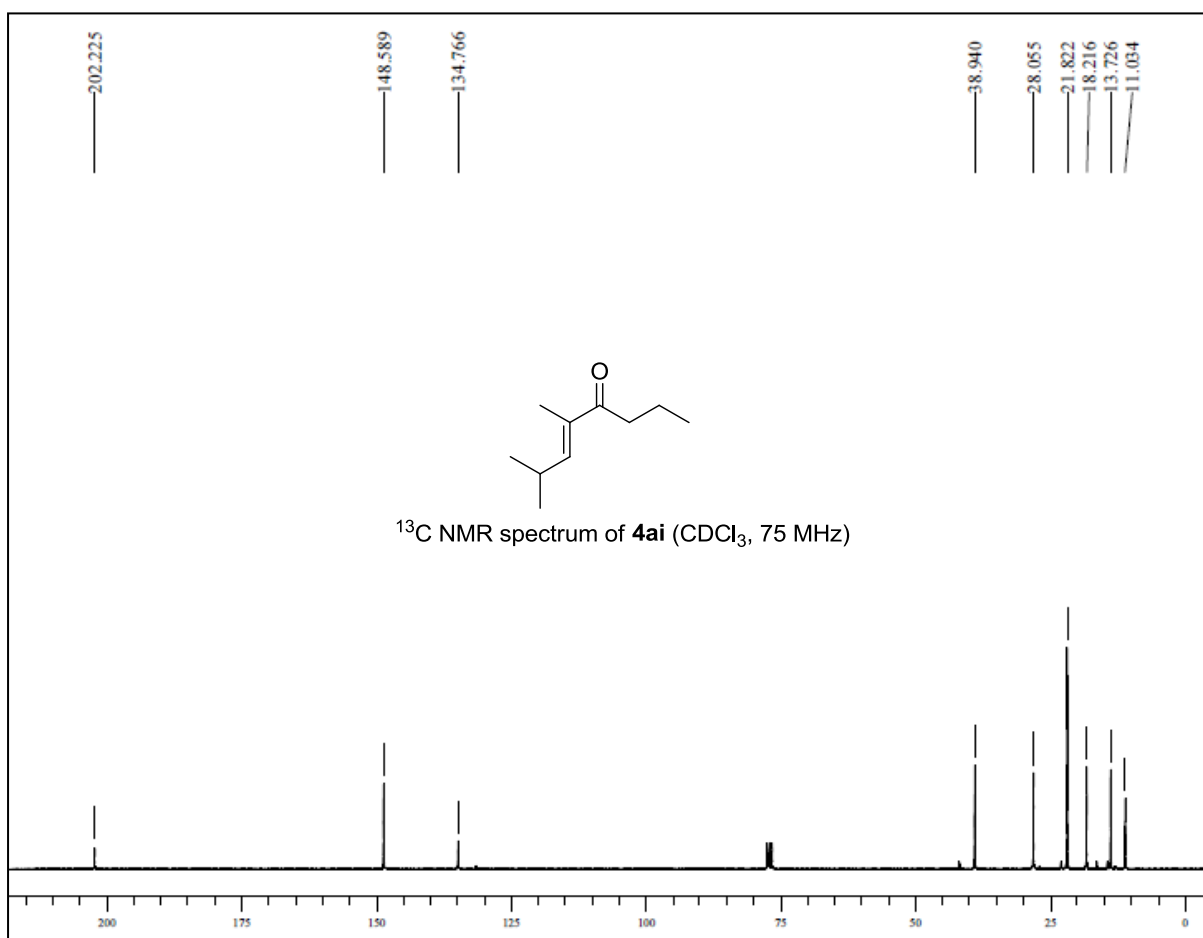

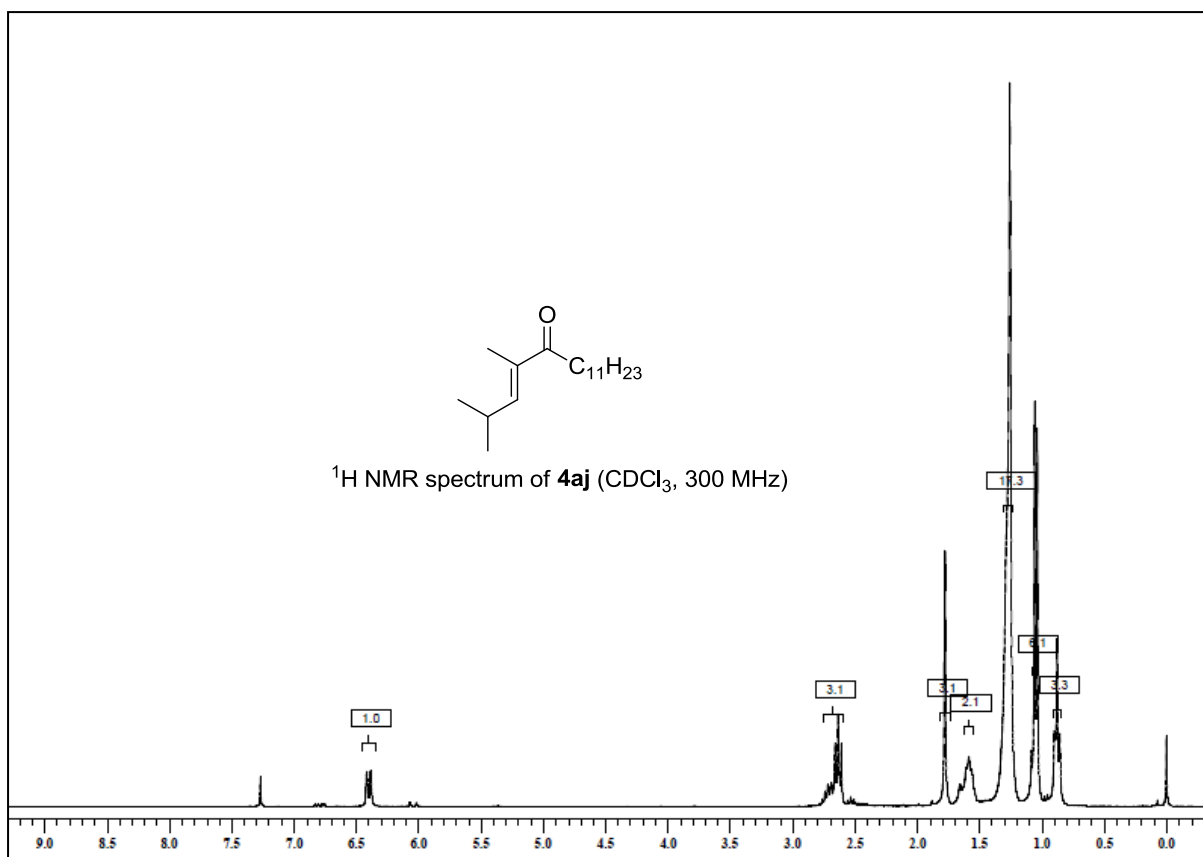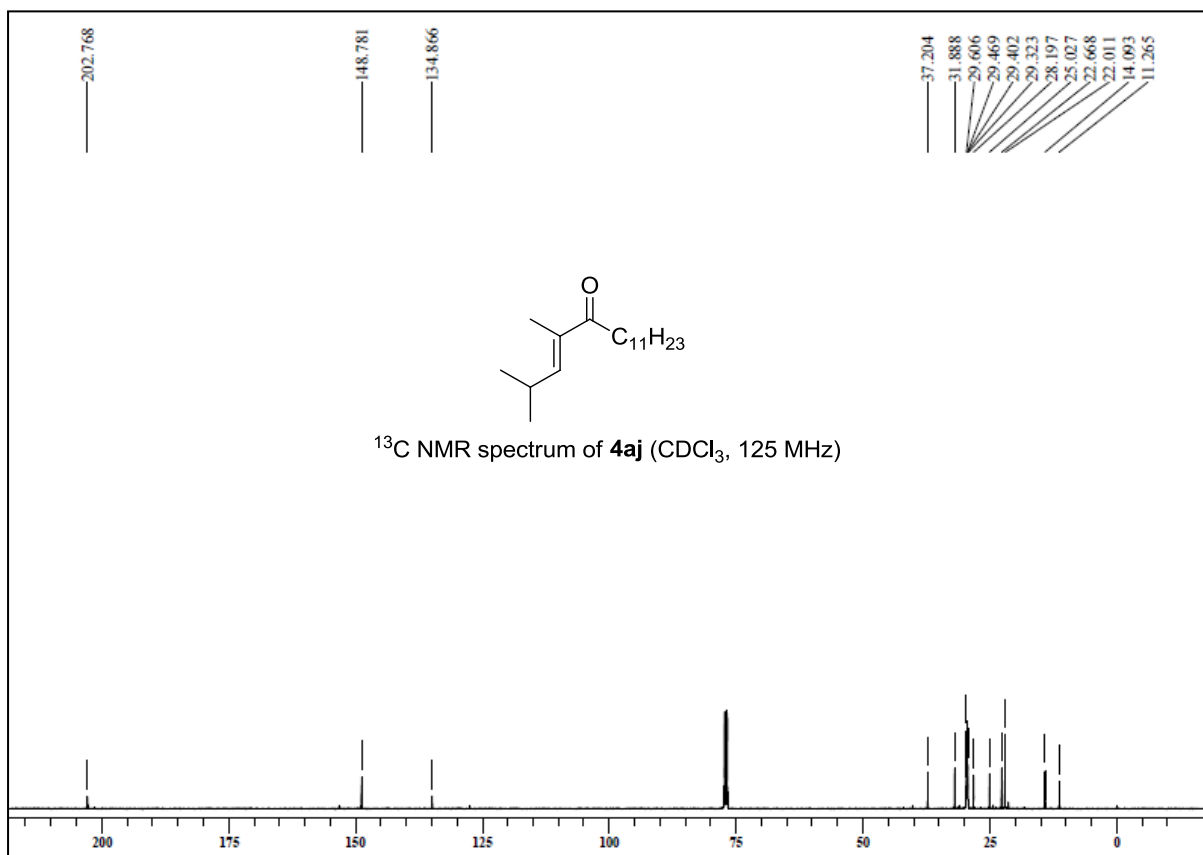

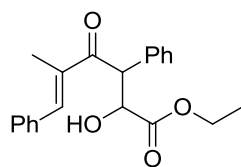

$^1\text{H}$  NMR spectrum of **5a** ( $\text{CDCl}_3$ , 300 MHz)

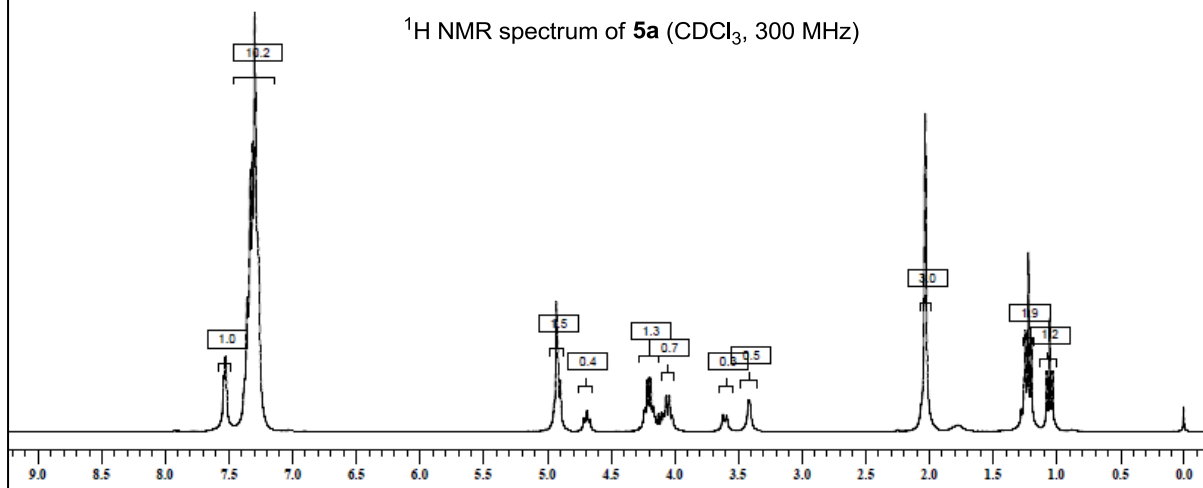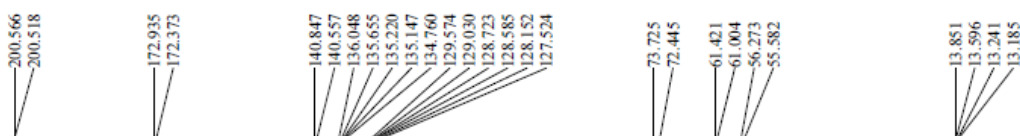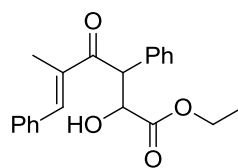

$^{13}\text{C}$  NMR spectrum of **5a** ( $\text{CDCl}_3$ , 75 MHz)

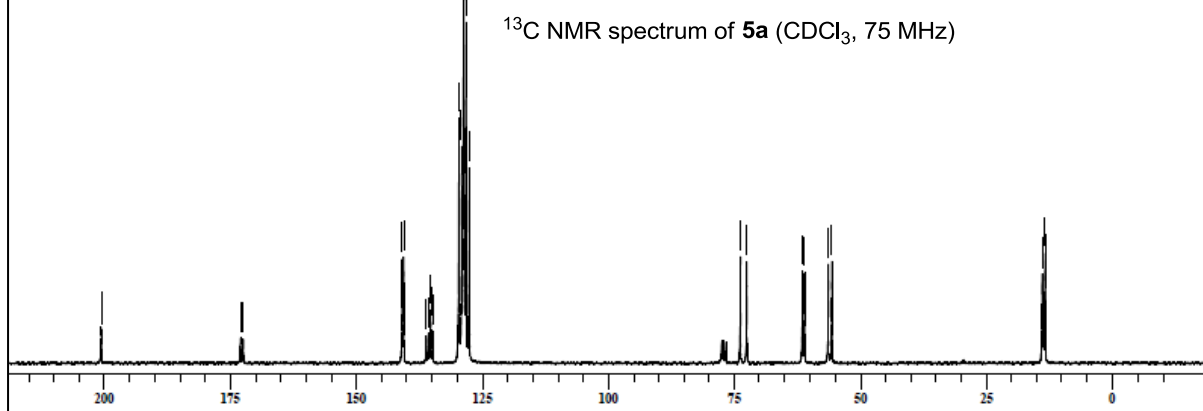

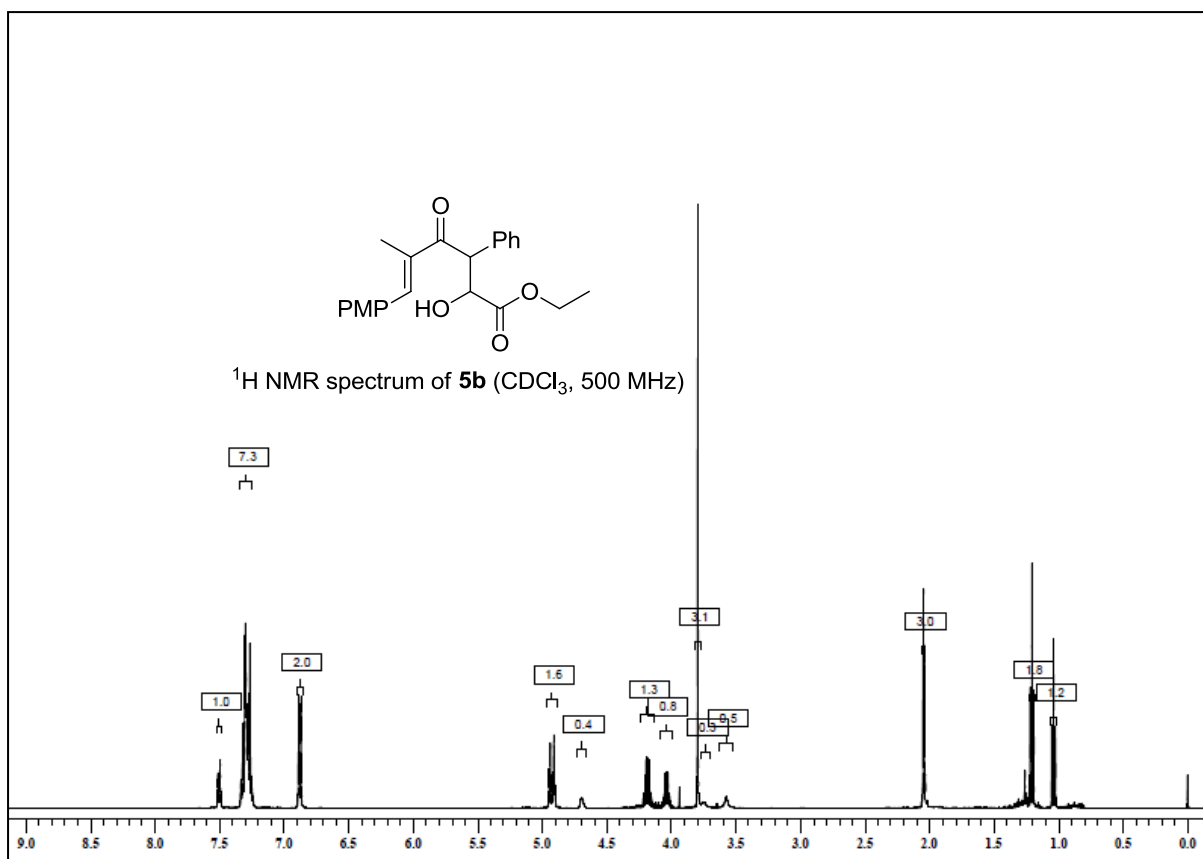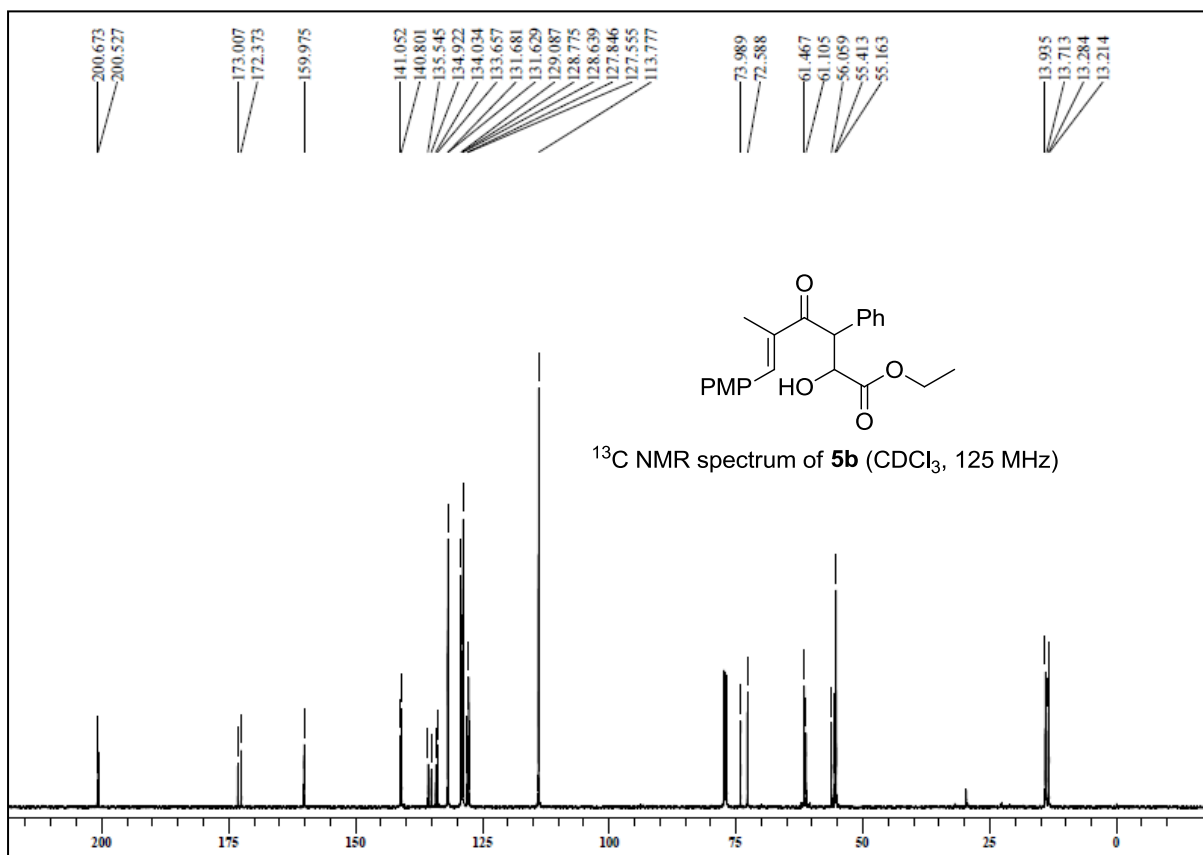

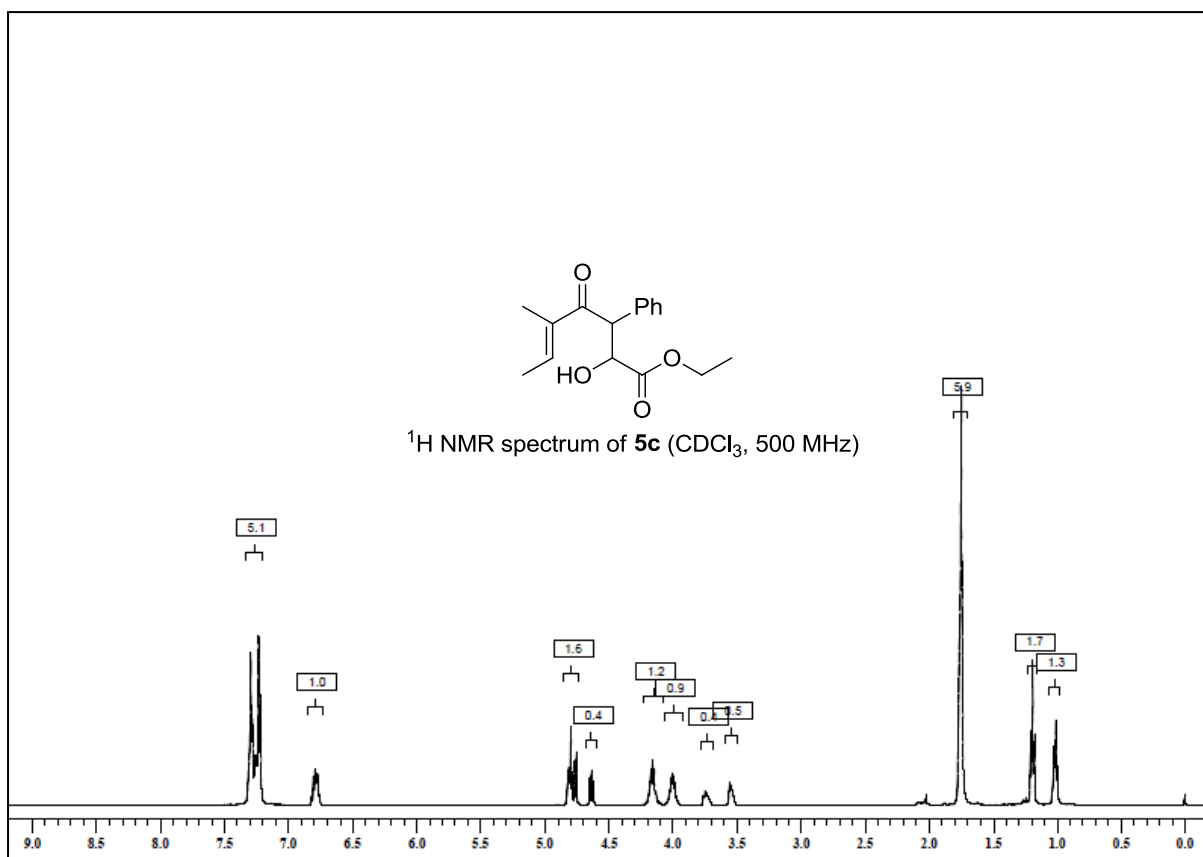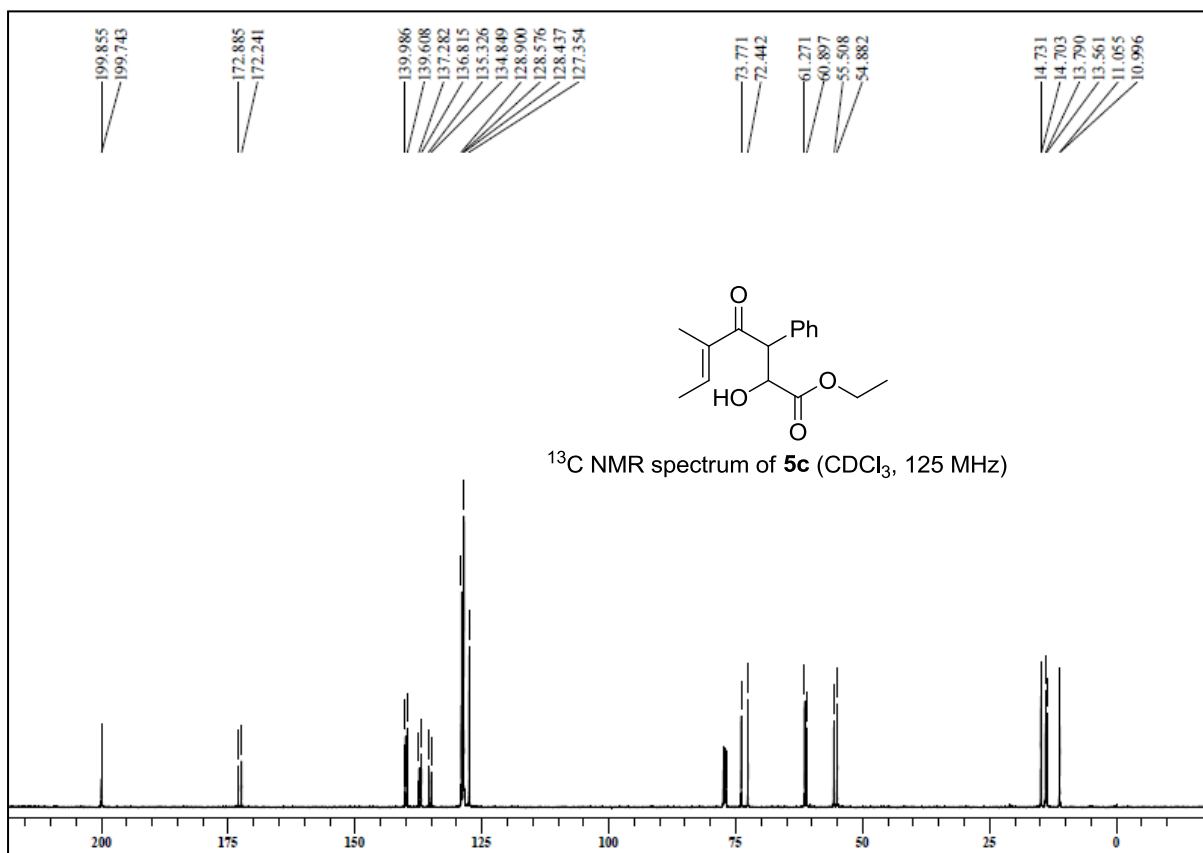

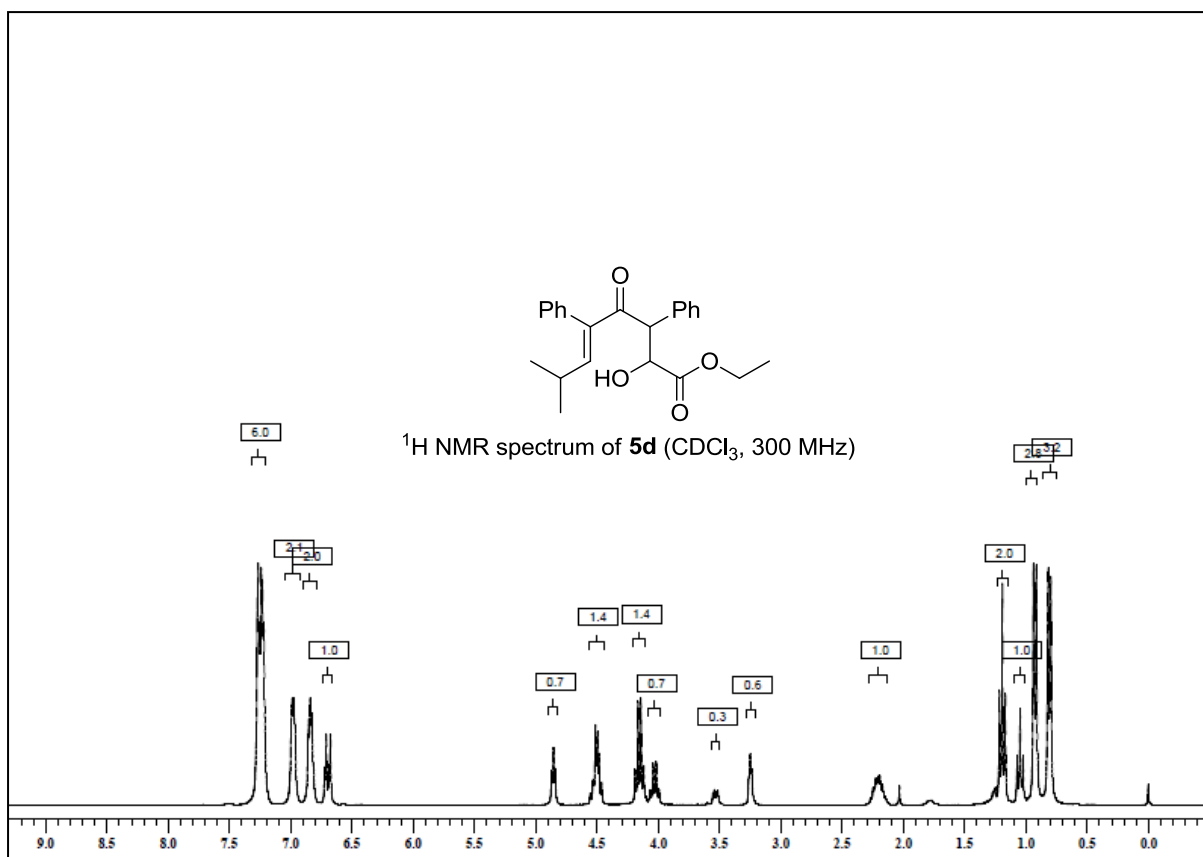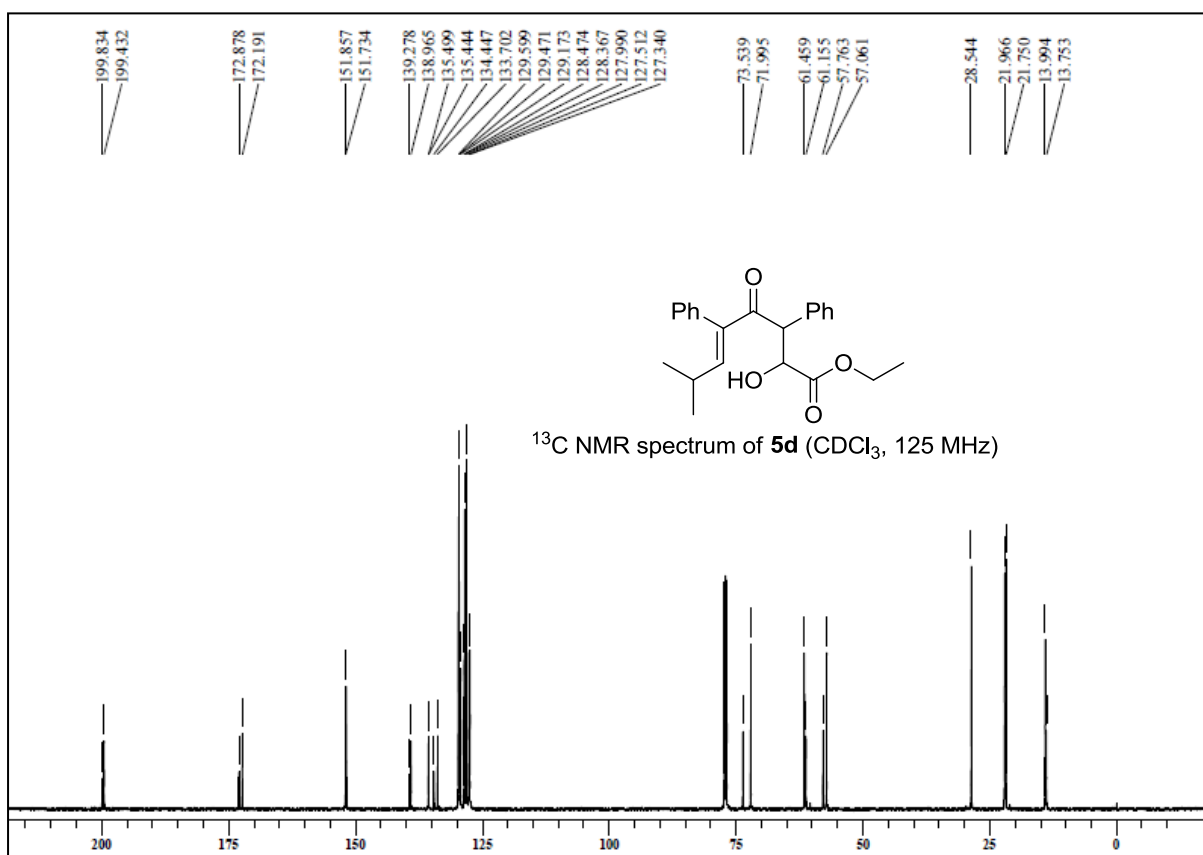



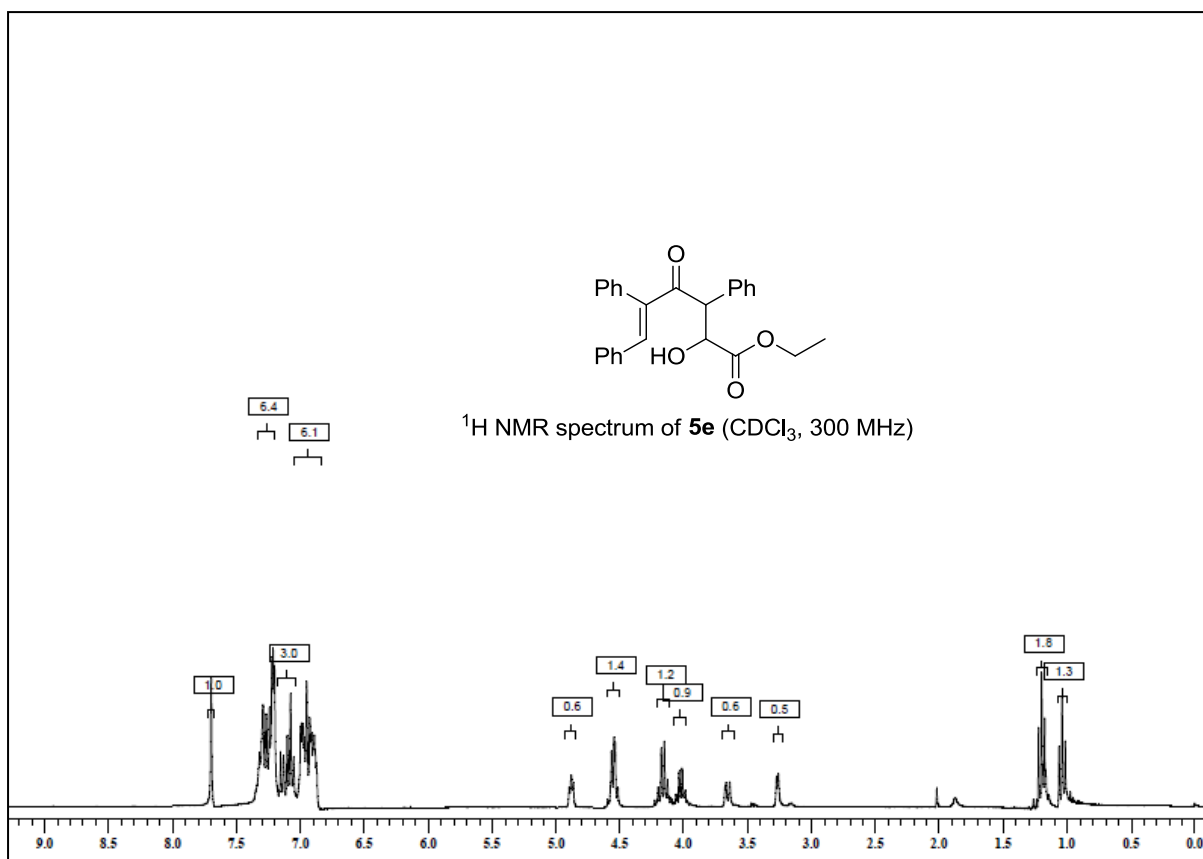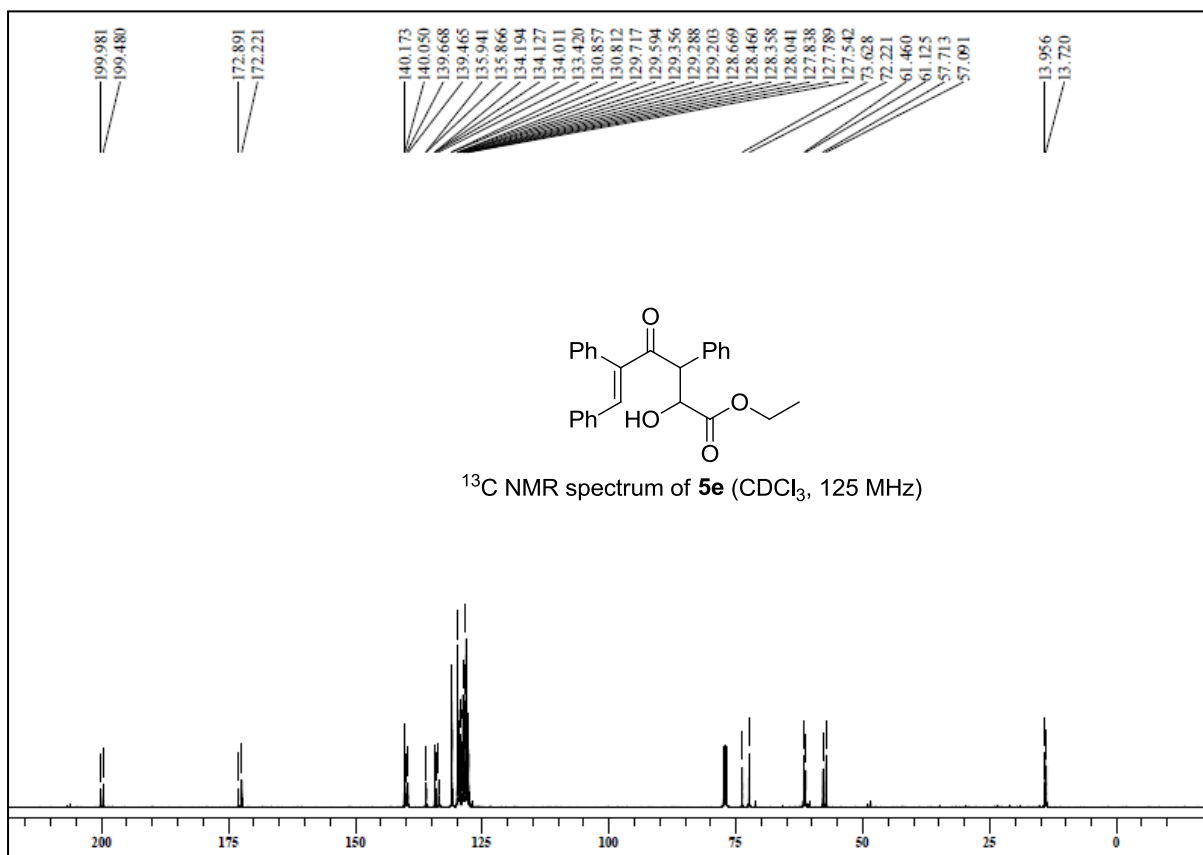

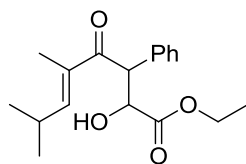

$^1\text{H}$  NMR spectrum of **5f** ( $\text{CDCl}_3$ , 300 MHz)

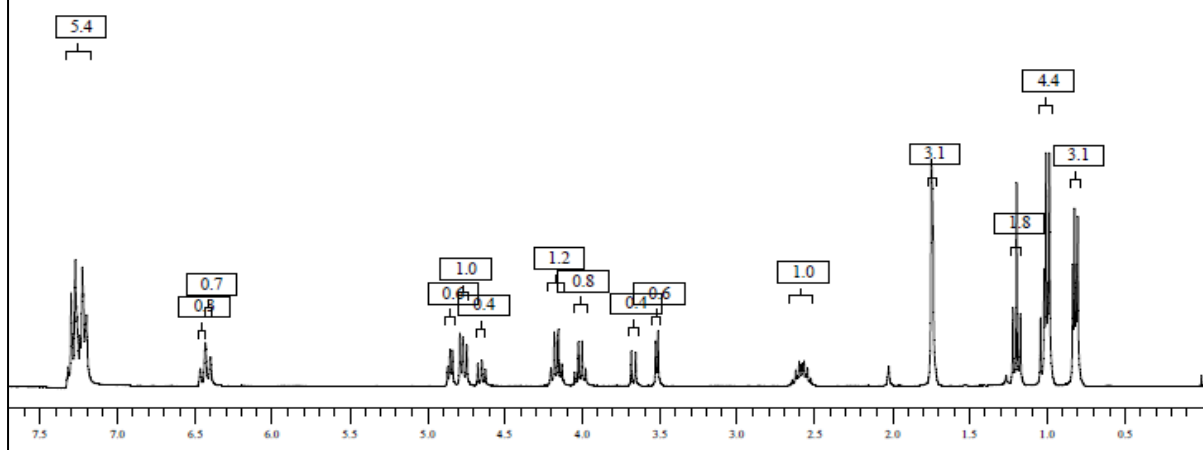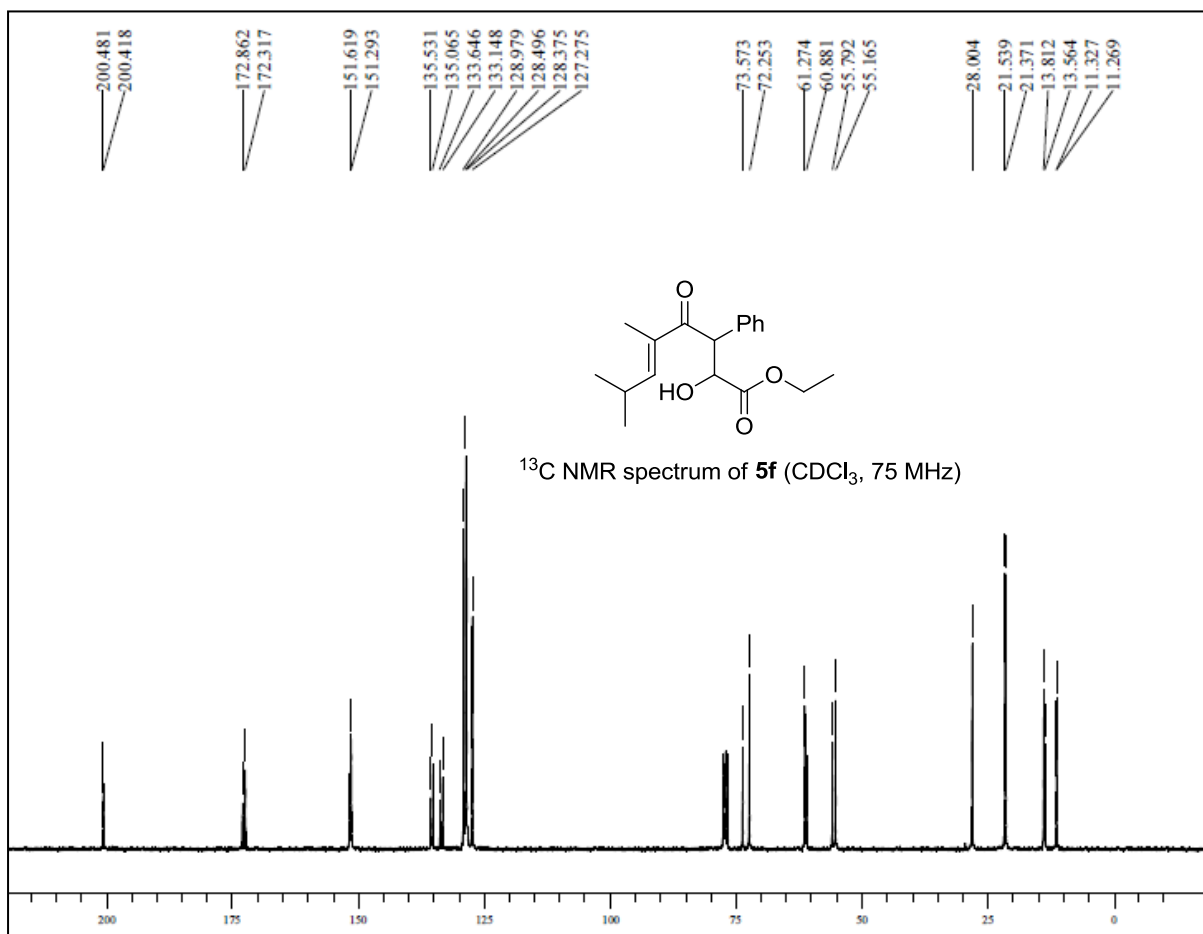

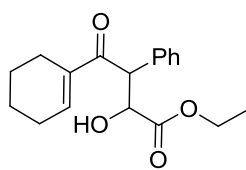

$^1\text{H}$  NMR spectrum of **5g** ( $\text{CDCl}_3$ , 300 MHz)

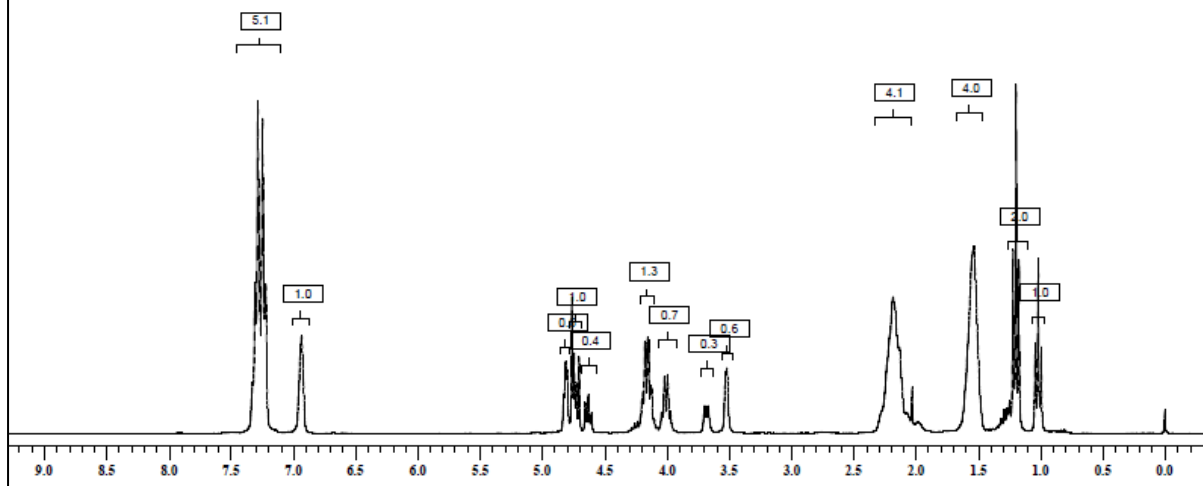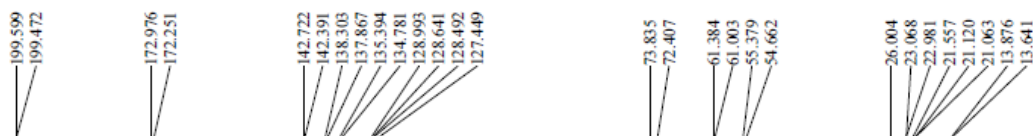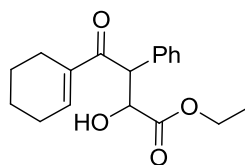

$^{13}\text{C}$  NMR spectrum of **5g** ( $\text{CDCl}_3$ , 75 MHz)

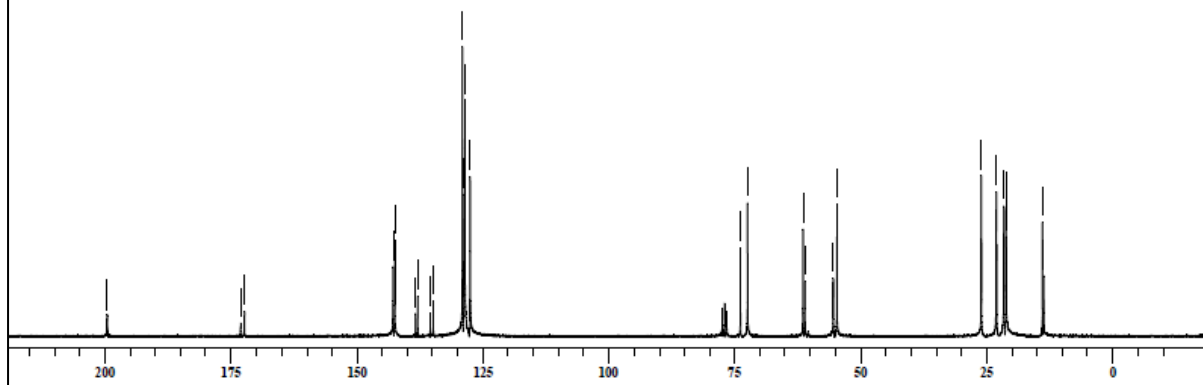

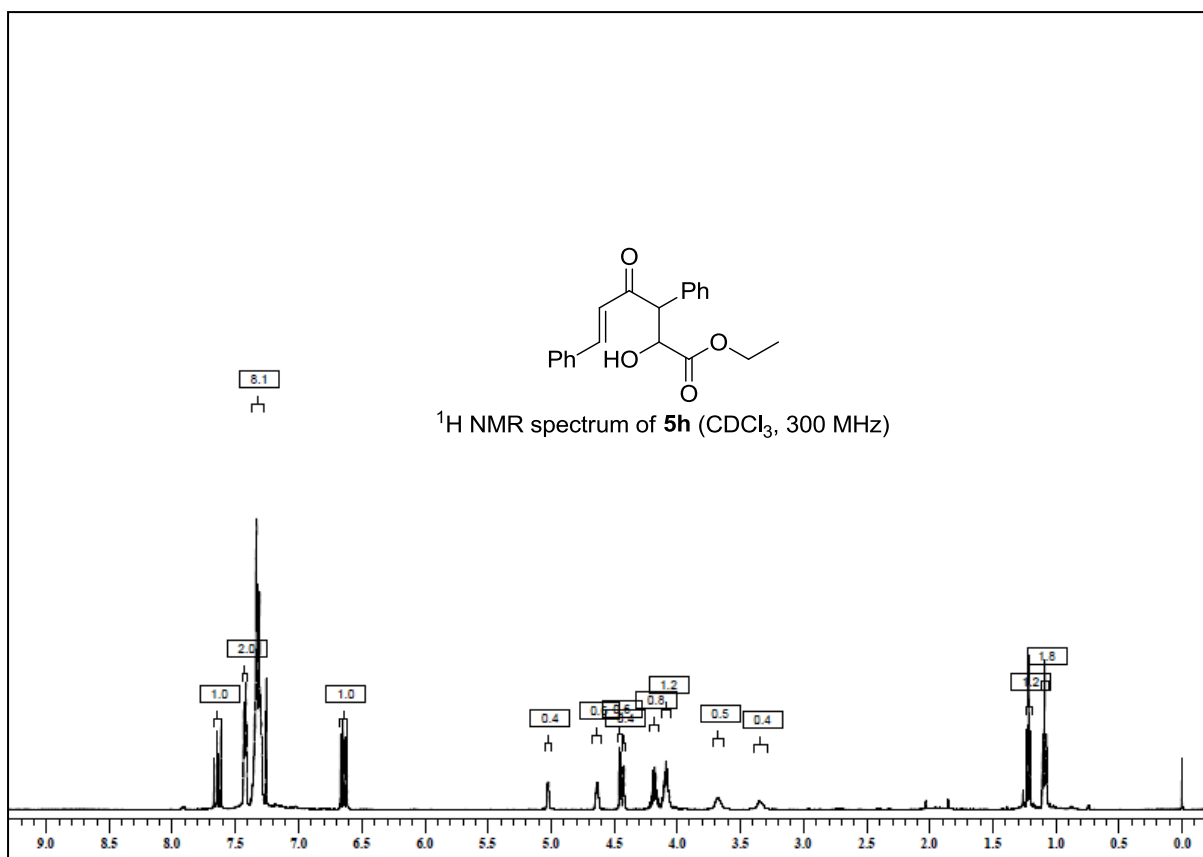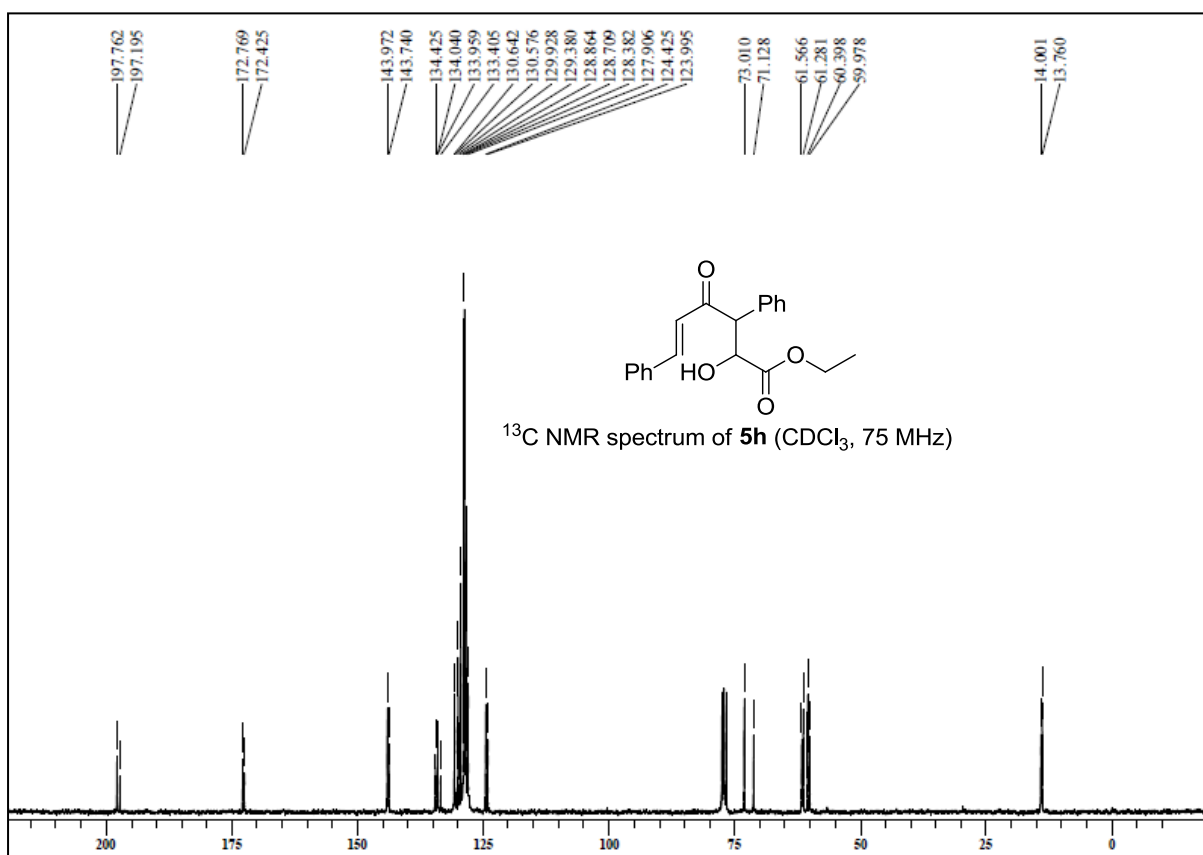

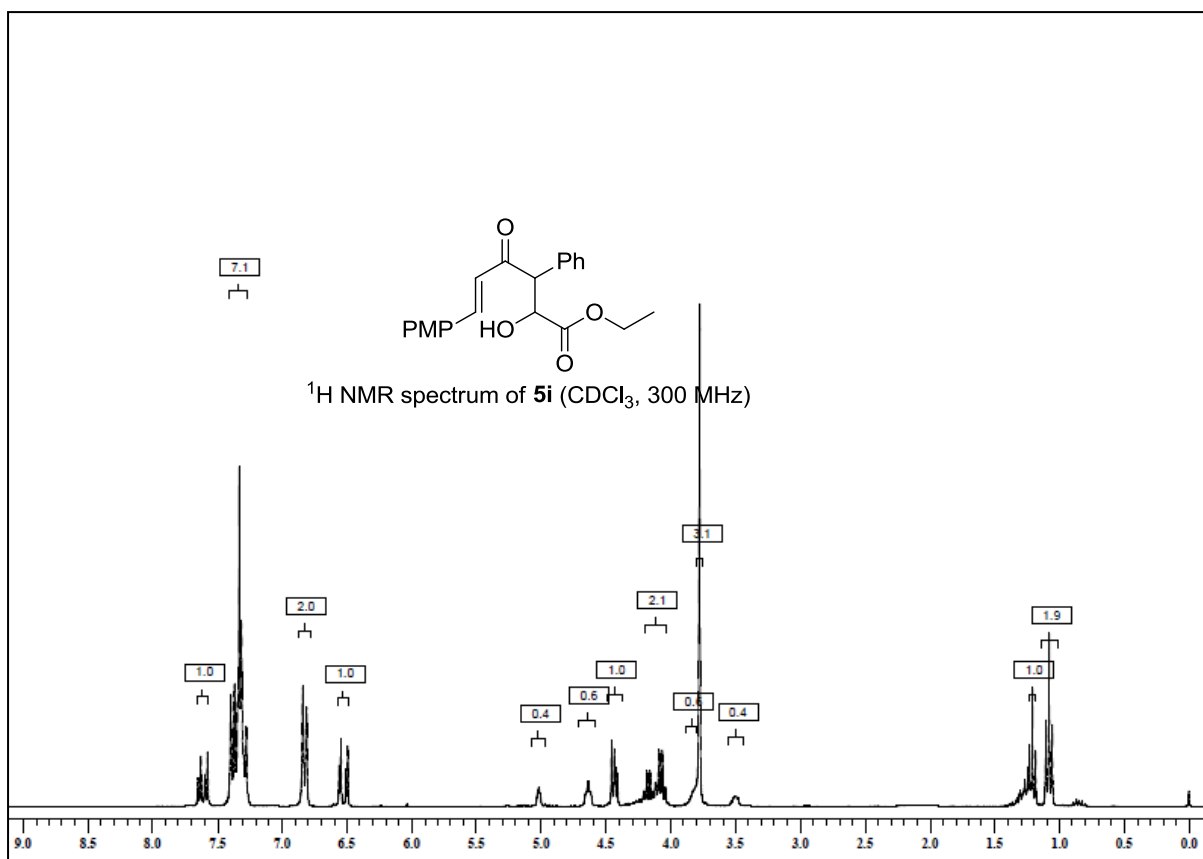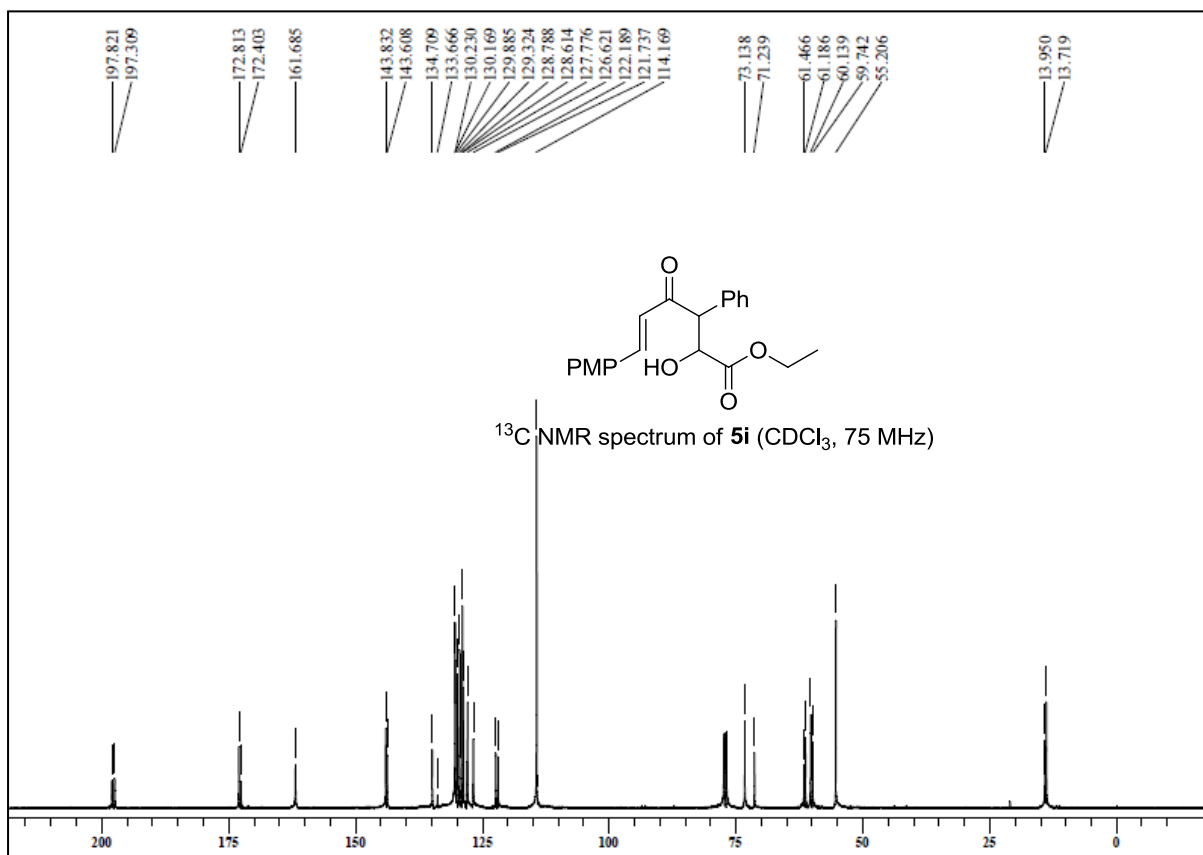

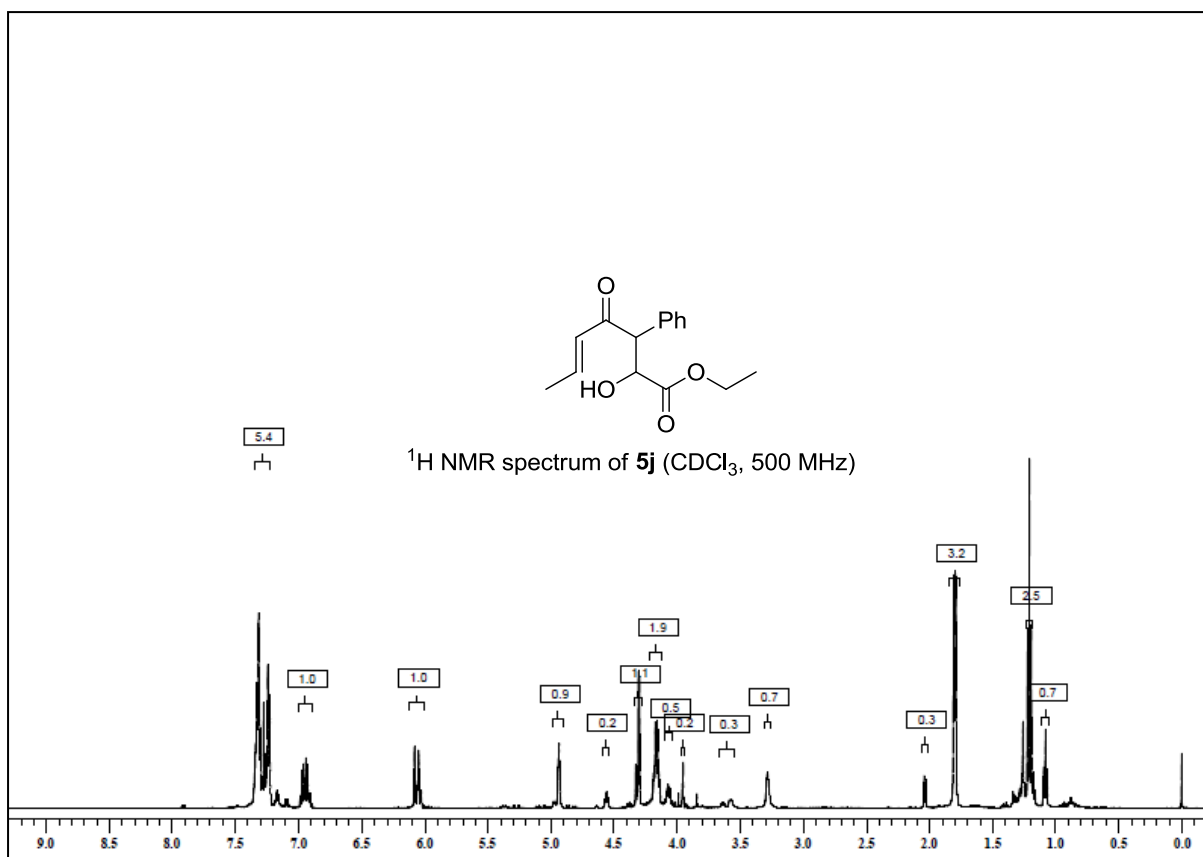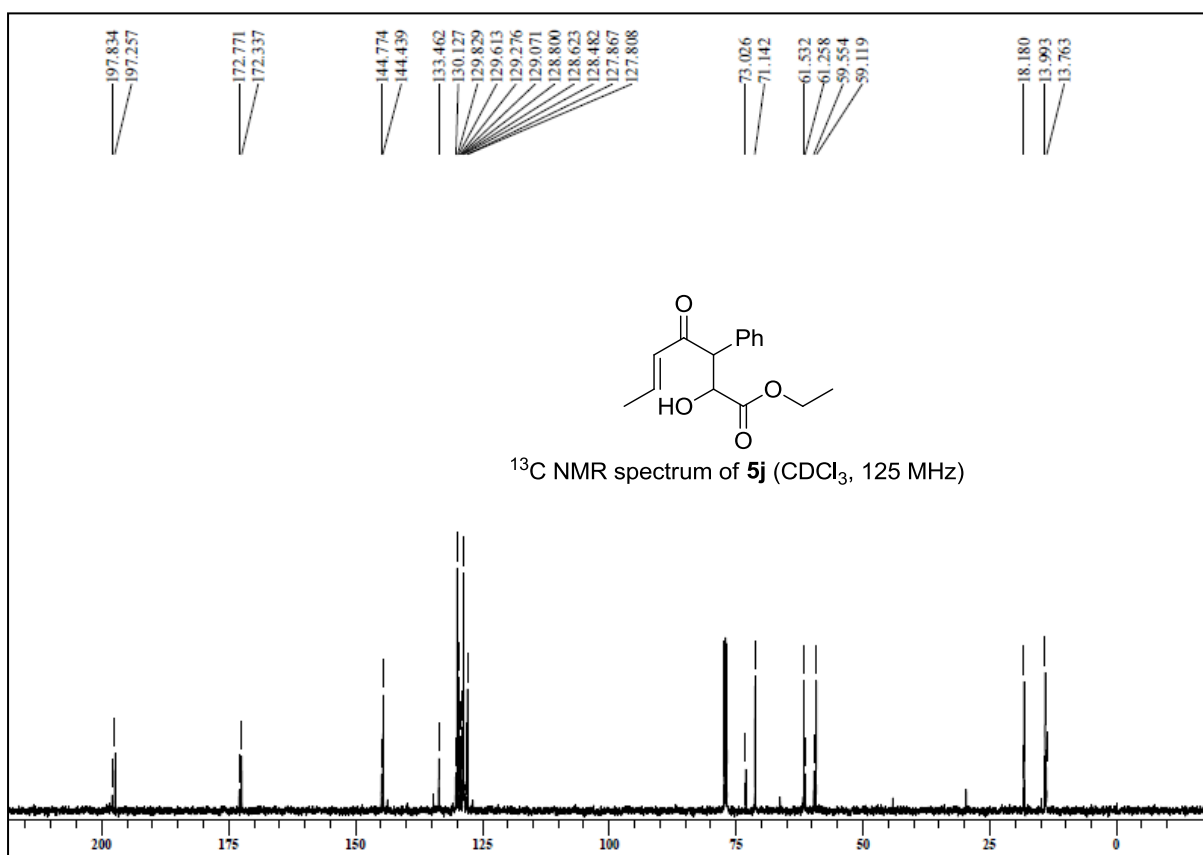

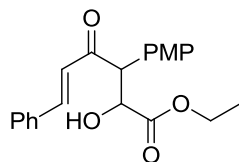

$^1\text{H}$  NMR spectrum of **5k** ( $\text{CDCl}_3$ , 300 MHz)

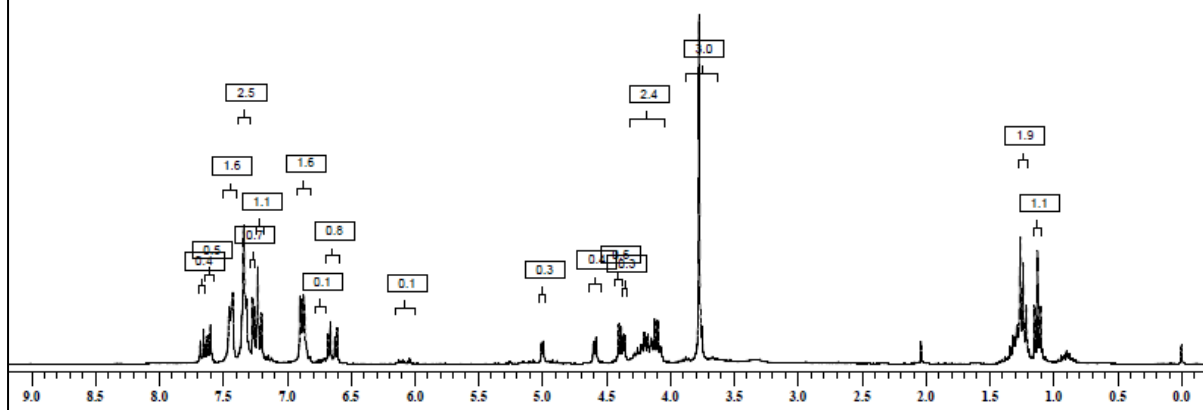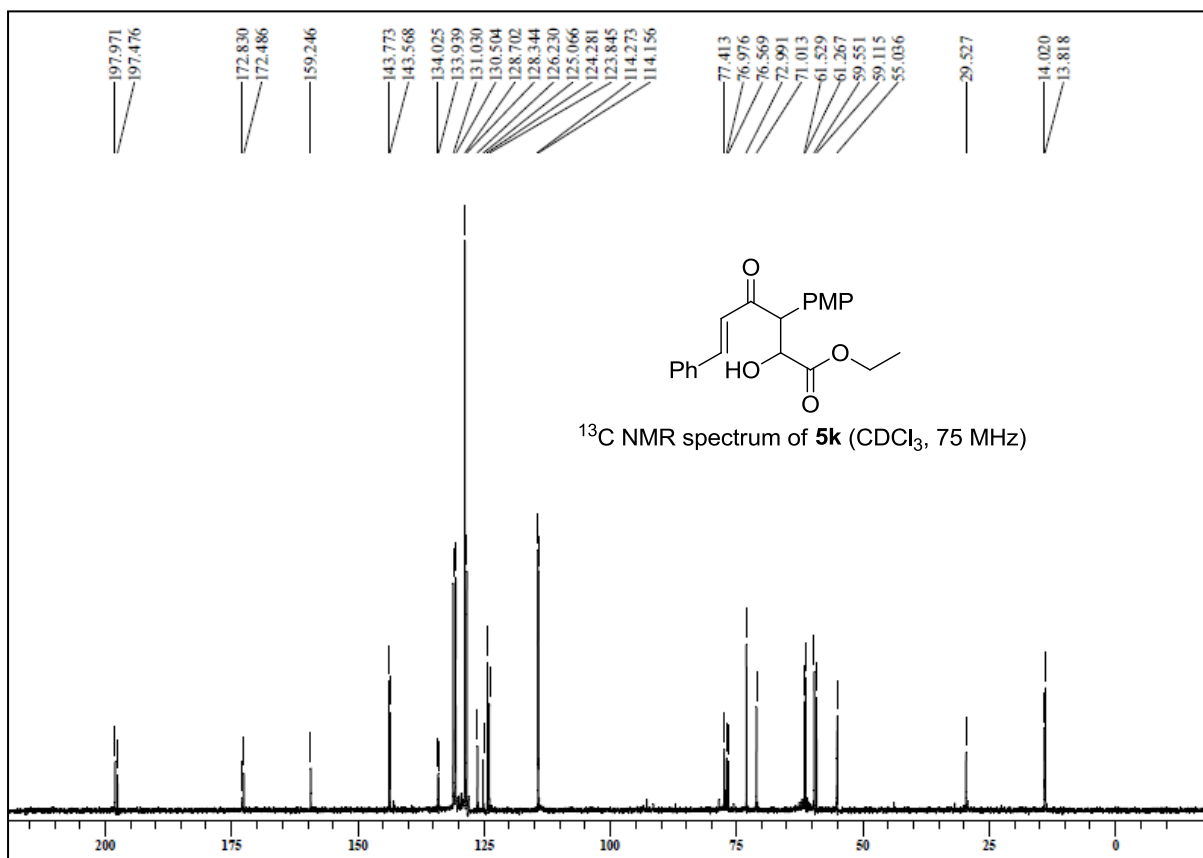

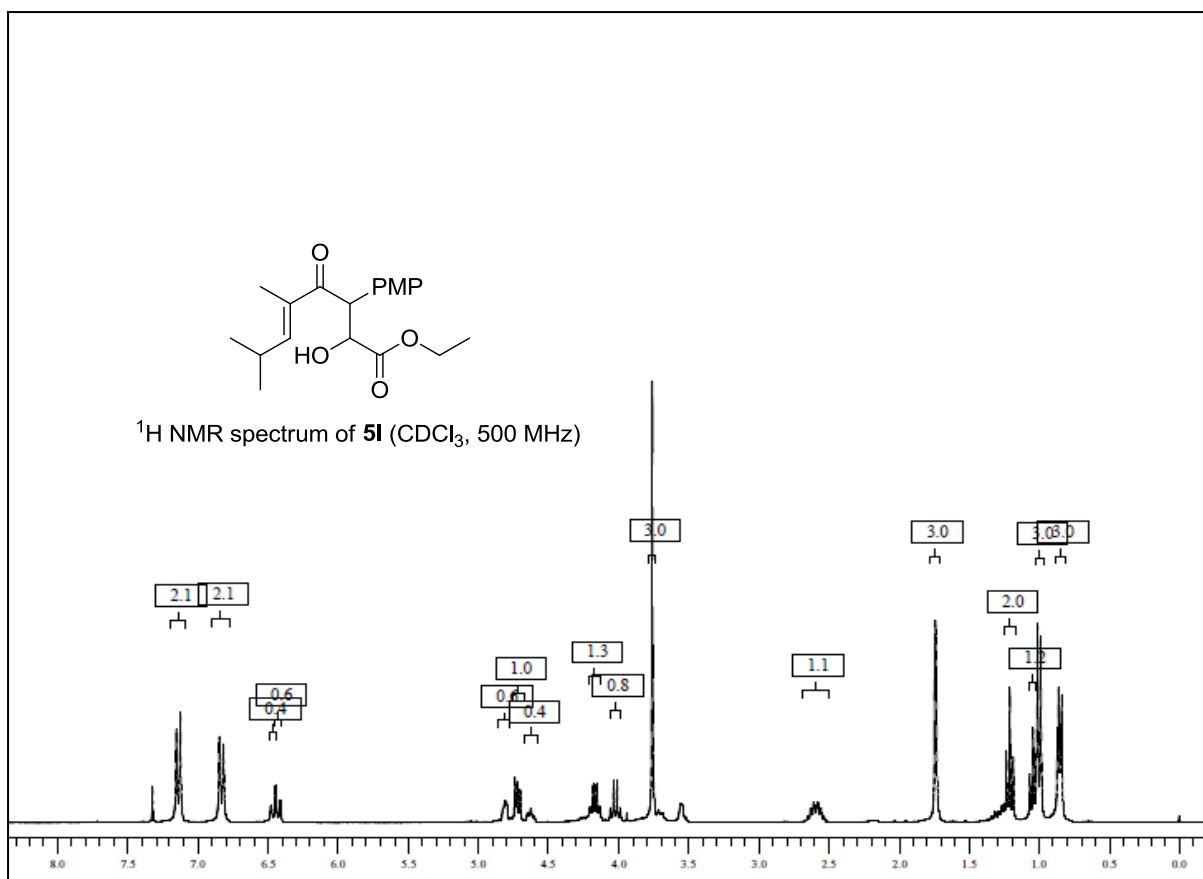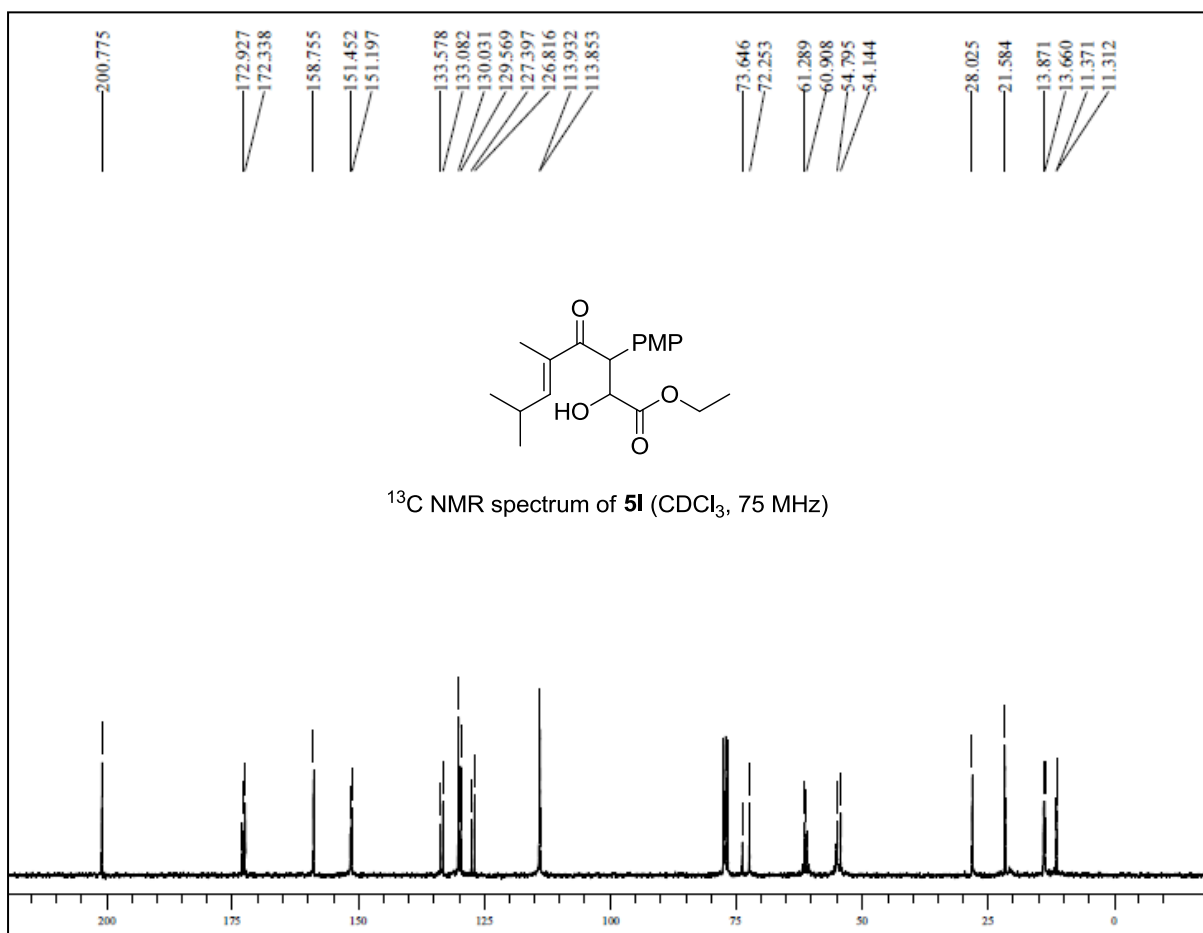



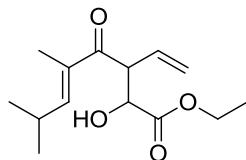

$^1\text{H}$  NMR spectrum of **5m** ( $\text{CDCl}_3$ , 500 MHz)

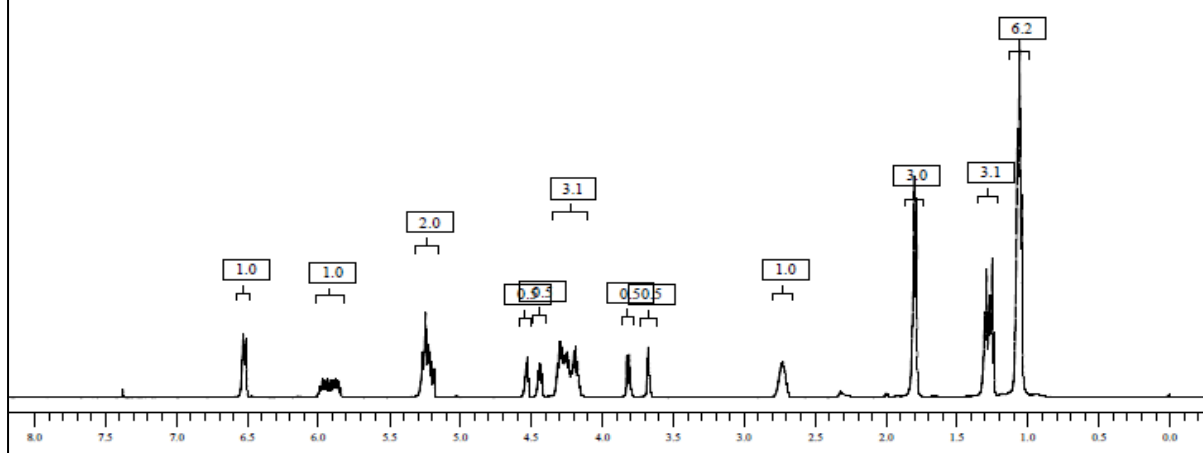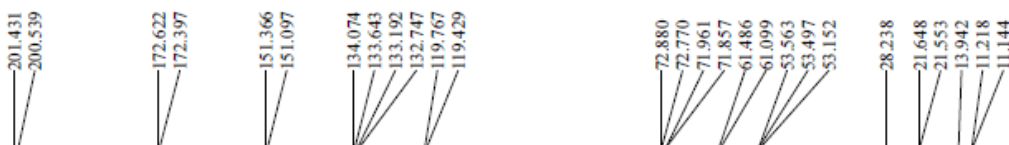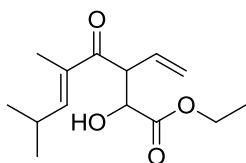

$^{13}\text{C}$  NMR spectrum of **5m** ( $\text{CDCl}_3$ , 75 MHz)

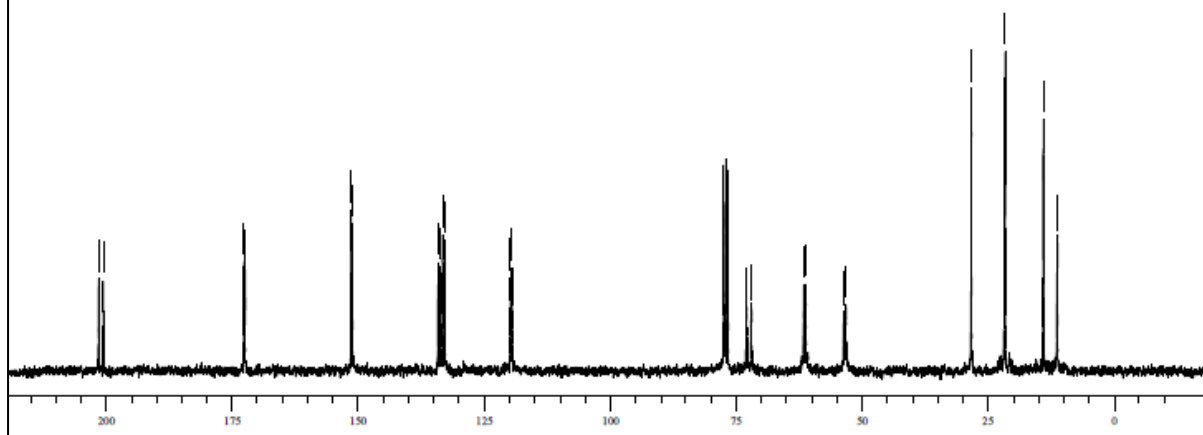

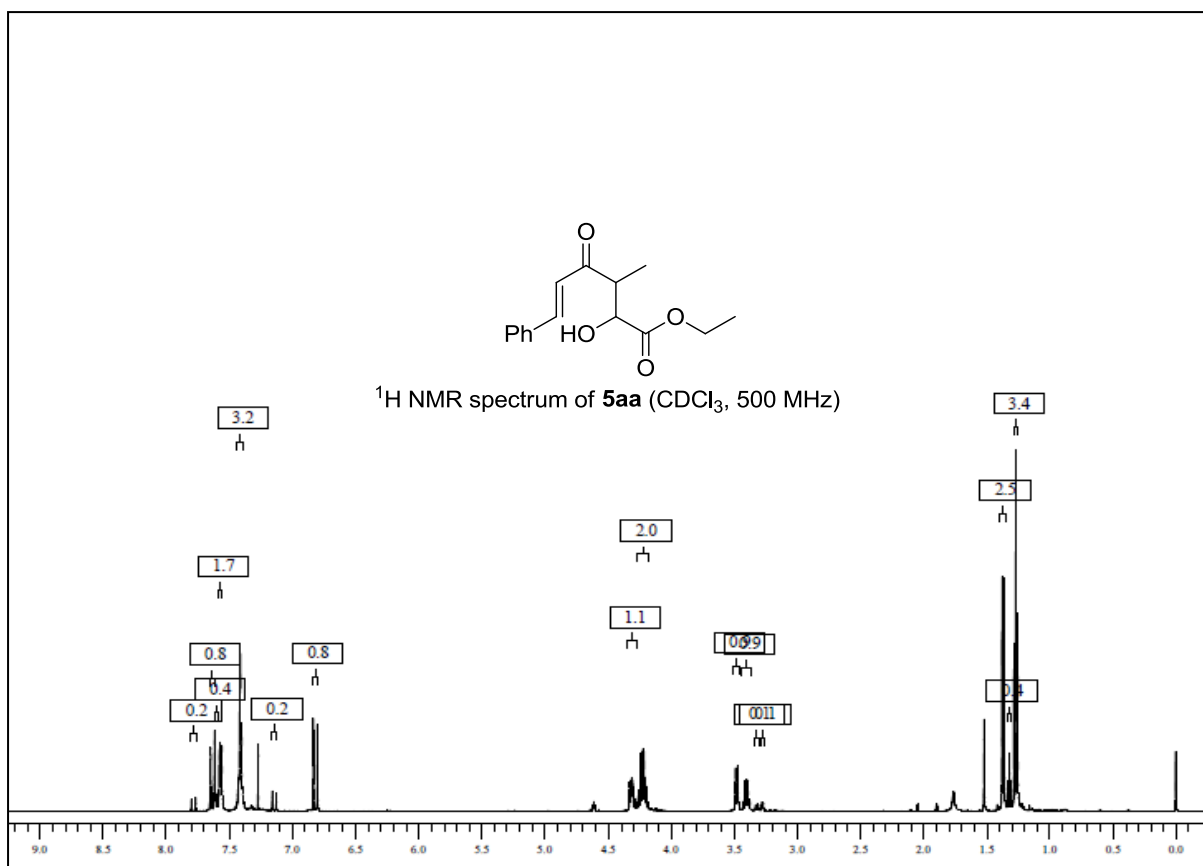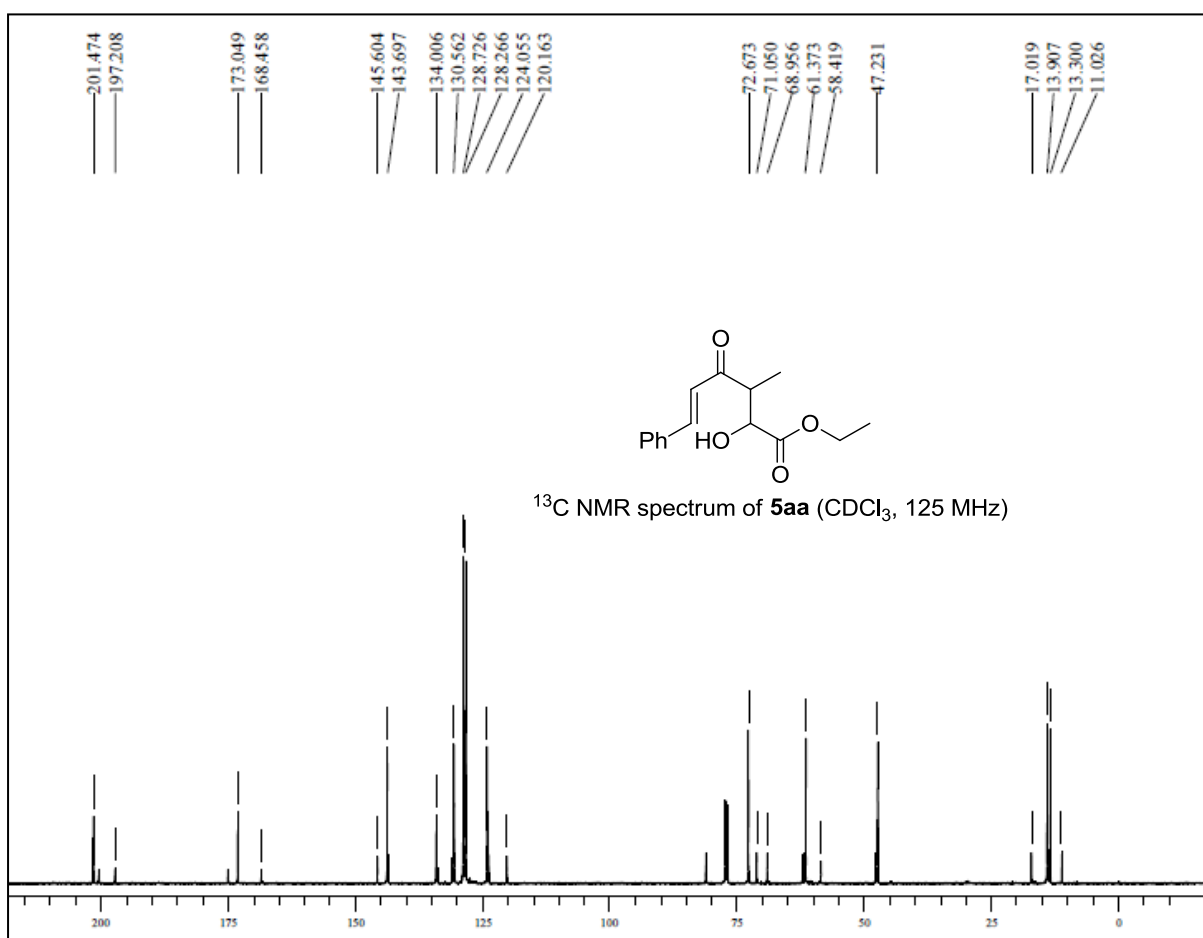

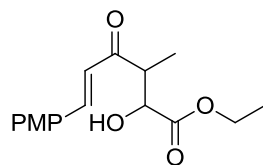

6.4

$^1\text{H}$  NMR spectrum of **5ab** ( $\text{CDCl}_3$ , 500 MHz)

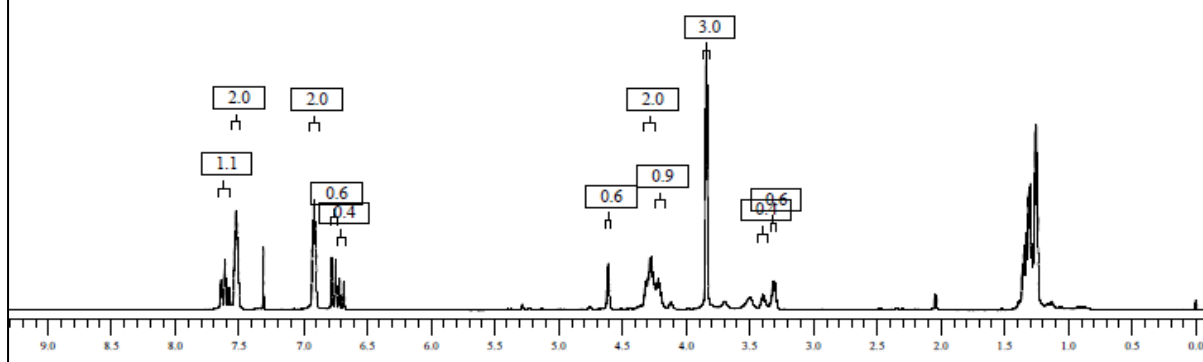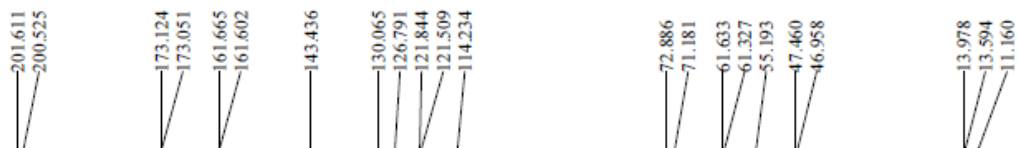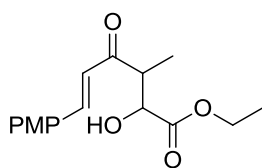

$^{13}\text{C}$  NMR spectrum of **5ab** ( $\text{CDCl}_3$ , 75 MHz)

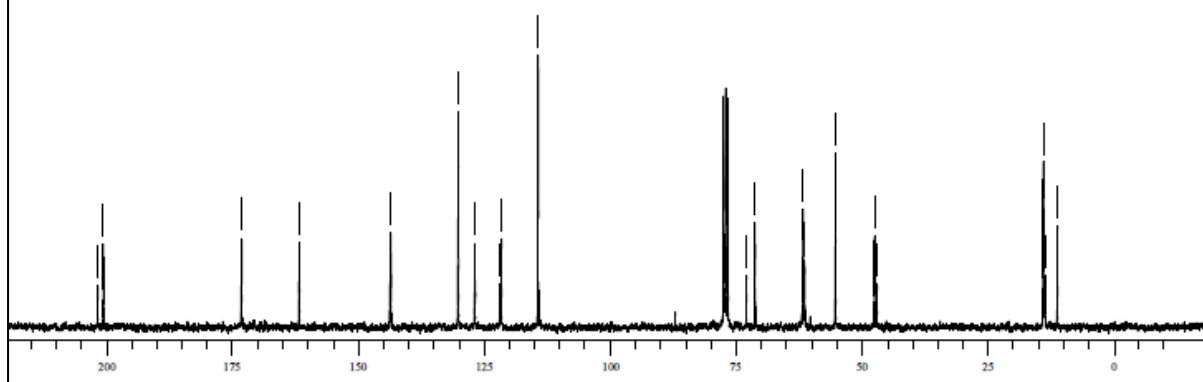

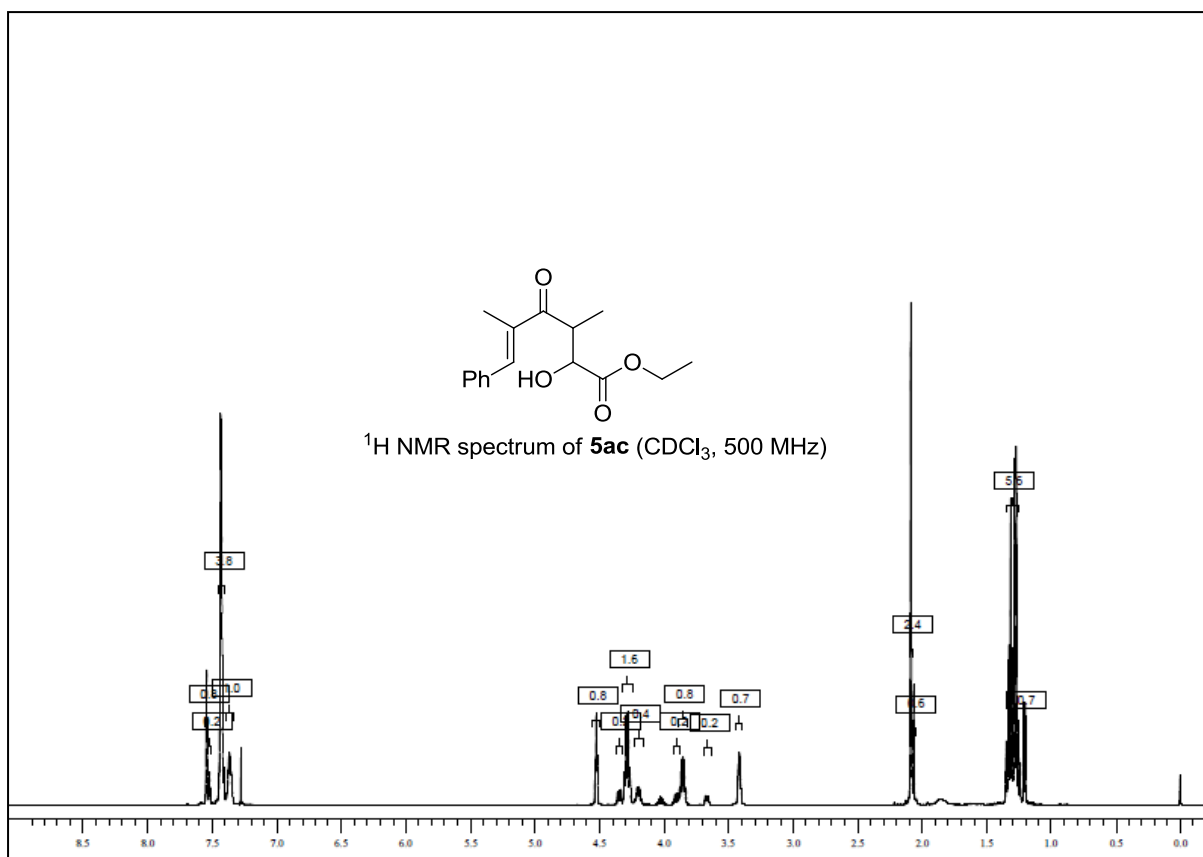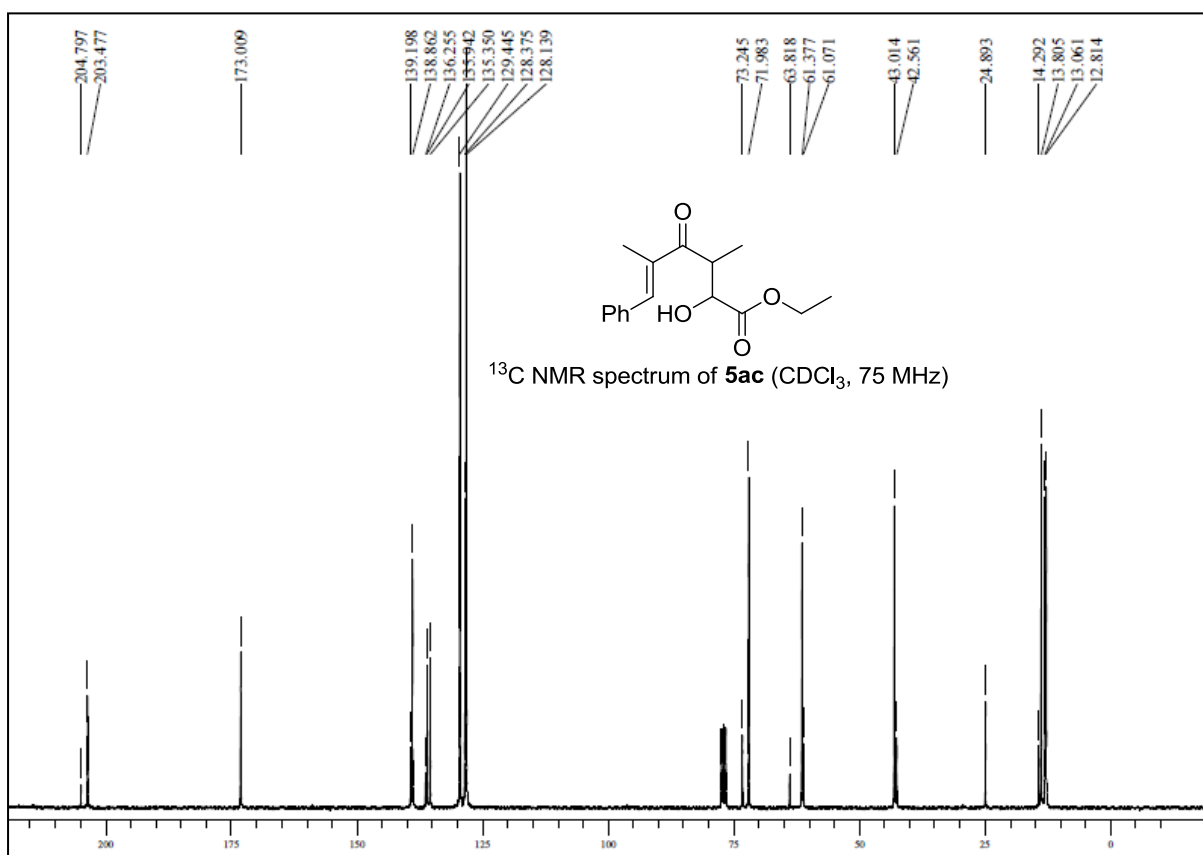

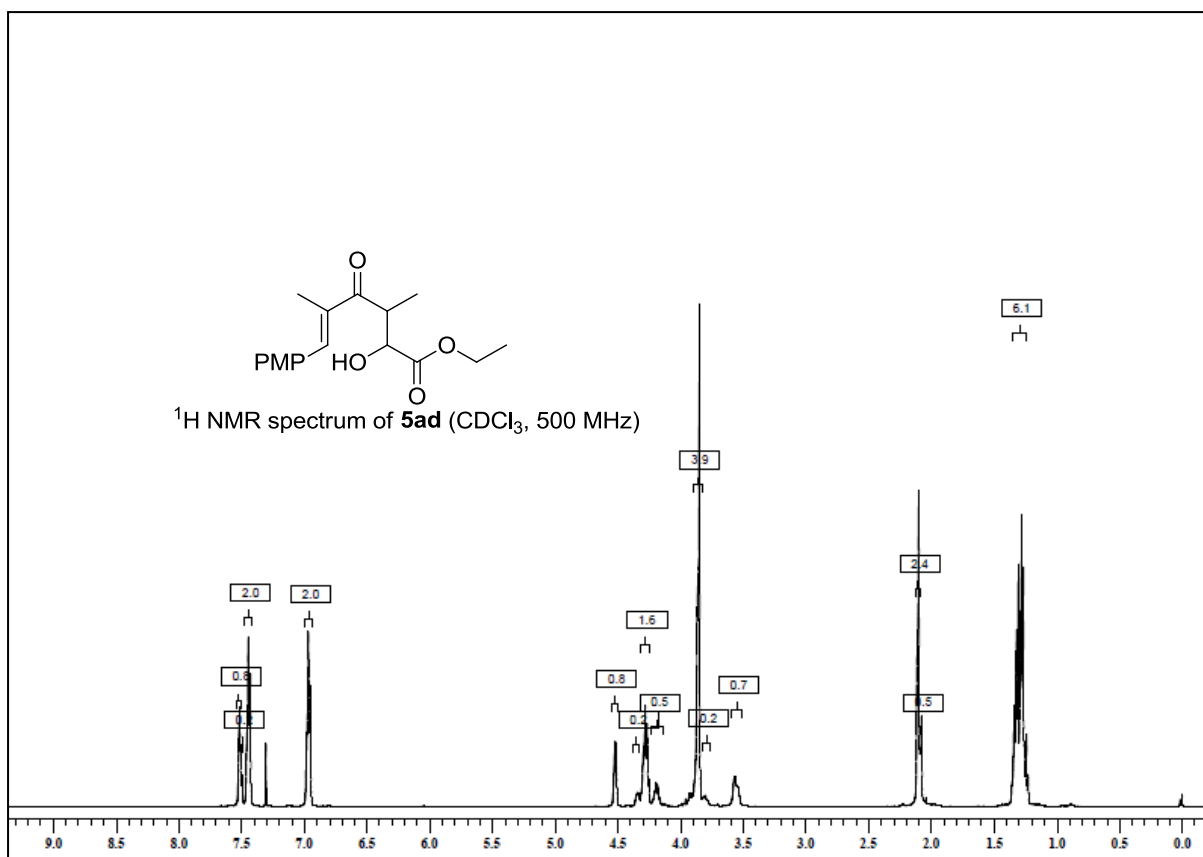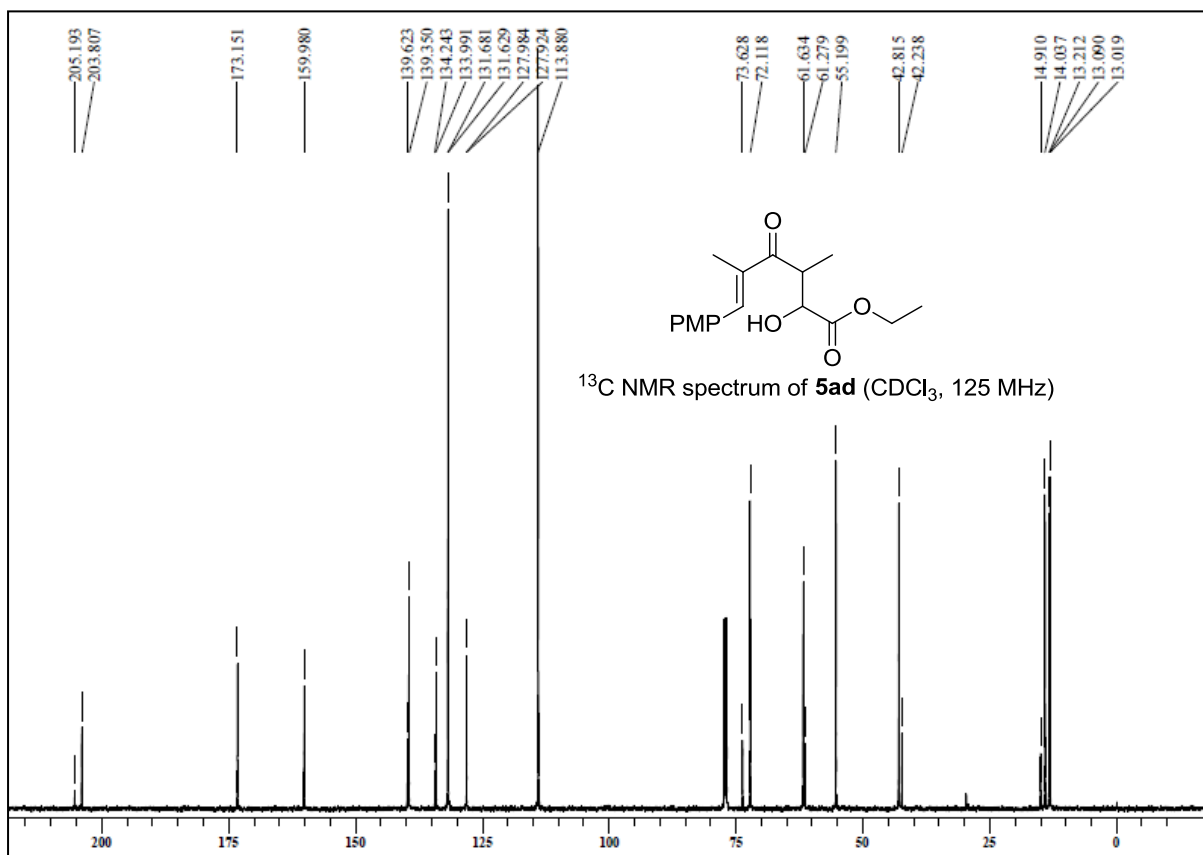

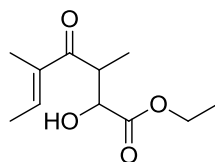

<sup>1</sup>H NMR spectrum of **5ae** (CDCl<sub>3</sub>, 300 MHz)

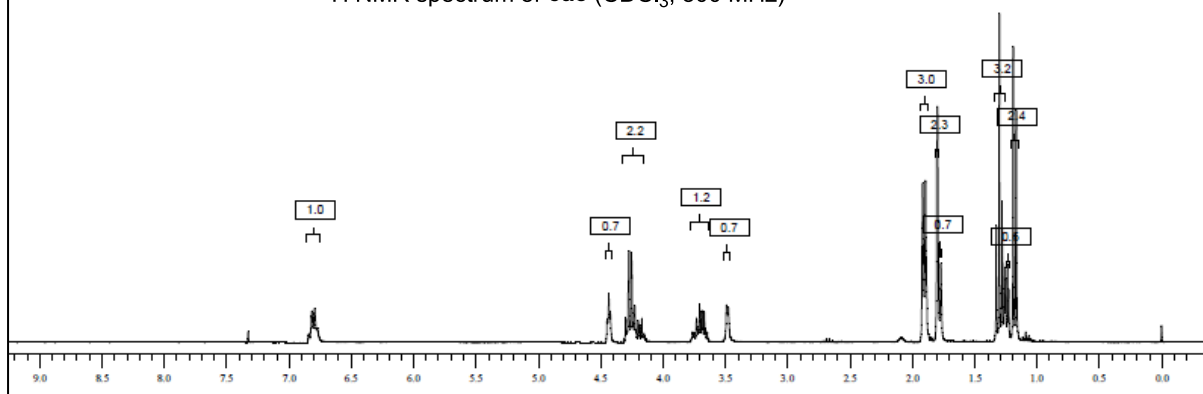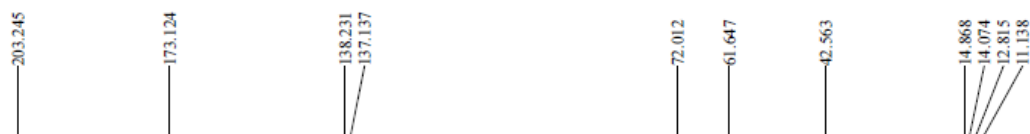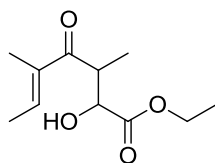

<sup>13</sup>C NMR spectrum of **5ae** (CDCl<sub>3</sub>, 75 MHz)

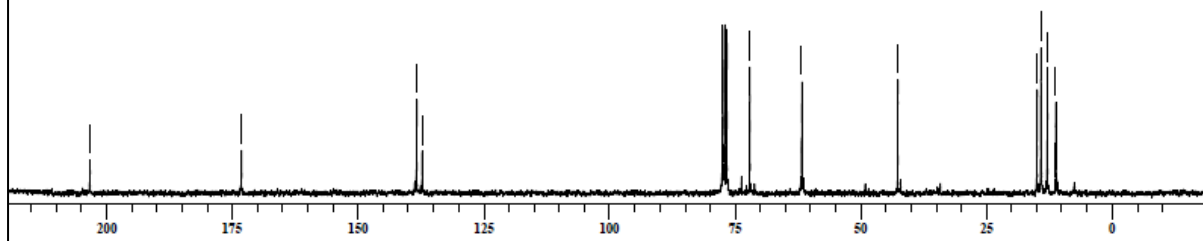

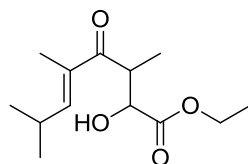

$^1\text{H}$  NMR spectrum of **5af** ( $\text{CDCl}_3$ , 500 MHz)

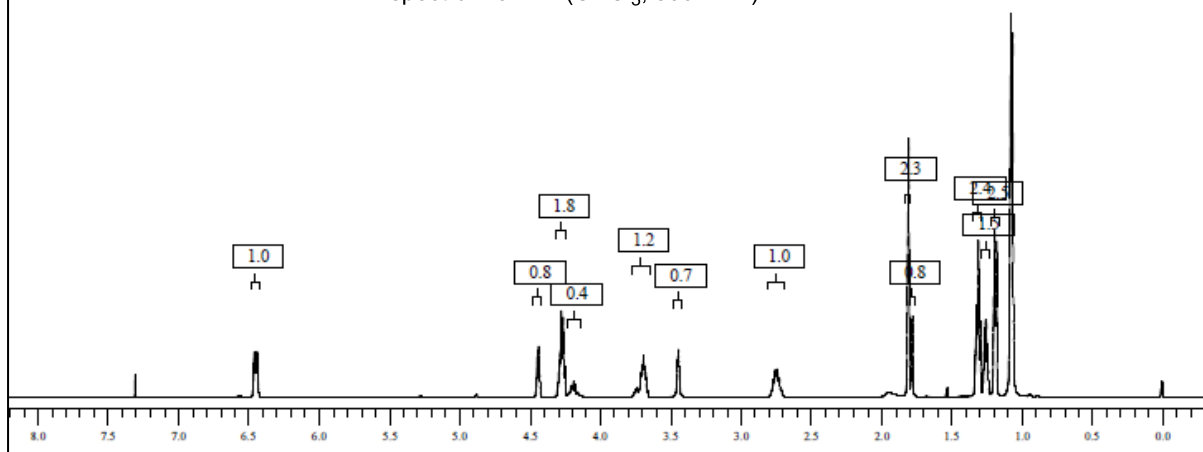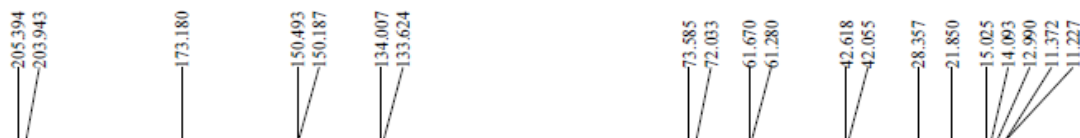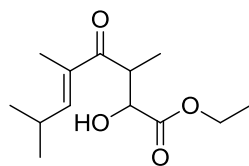

$^{13}\text{C}$  NMR spectrum of **5af** ( $\text{CDCl}_3$ , 125 MHz)

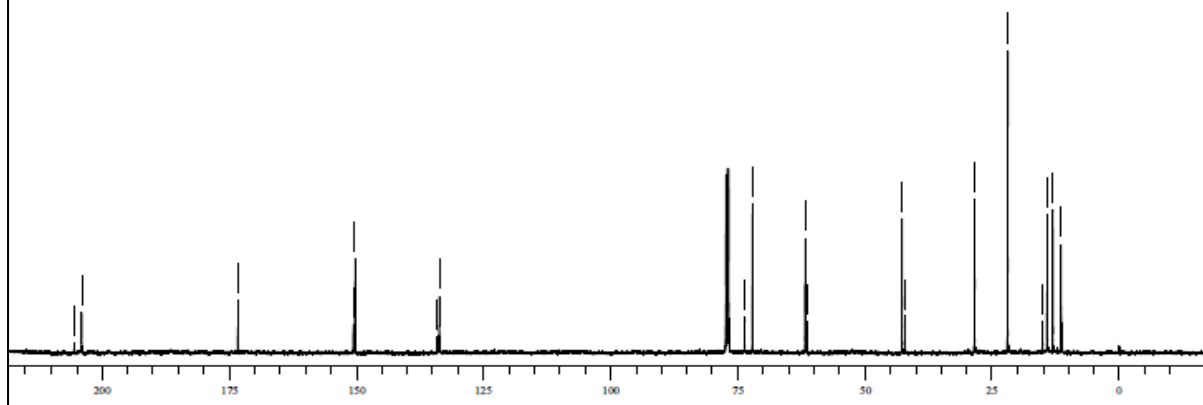

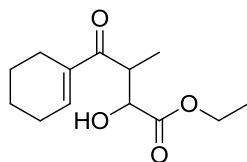

$^1\text{H}$  NMR spectrum of **5ag** ( $\text{CDCl}_3$ , 500 MHz)

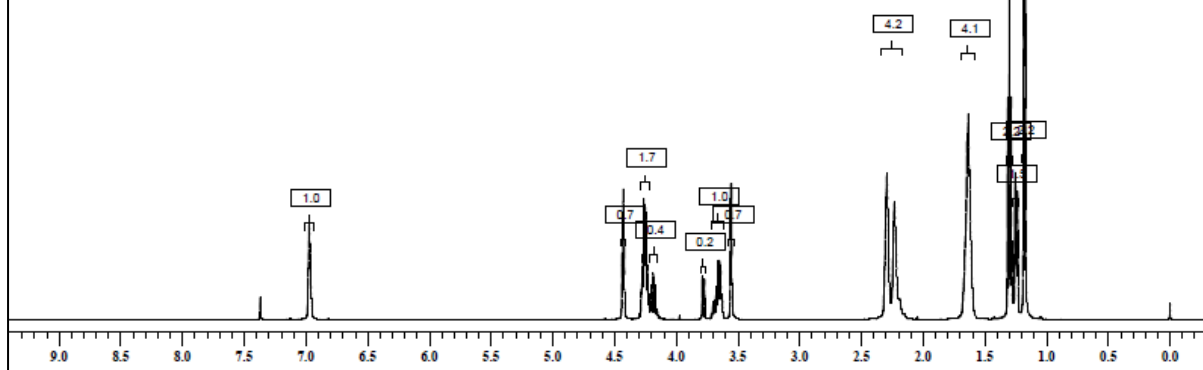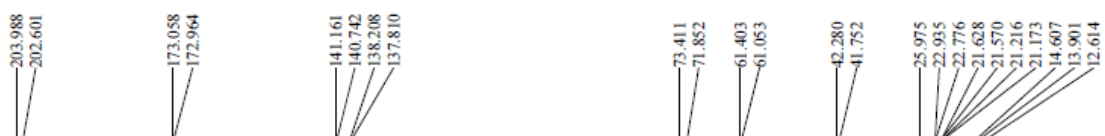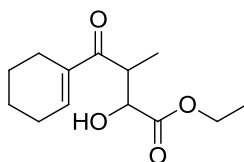

$^{13}\text{C}$  NMR spectrum of **5ag** ( $\text{CDCl}_3$ , 125 MHz)

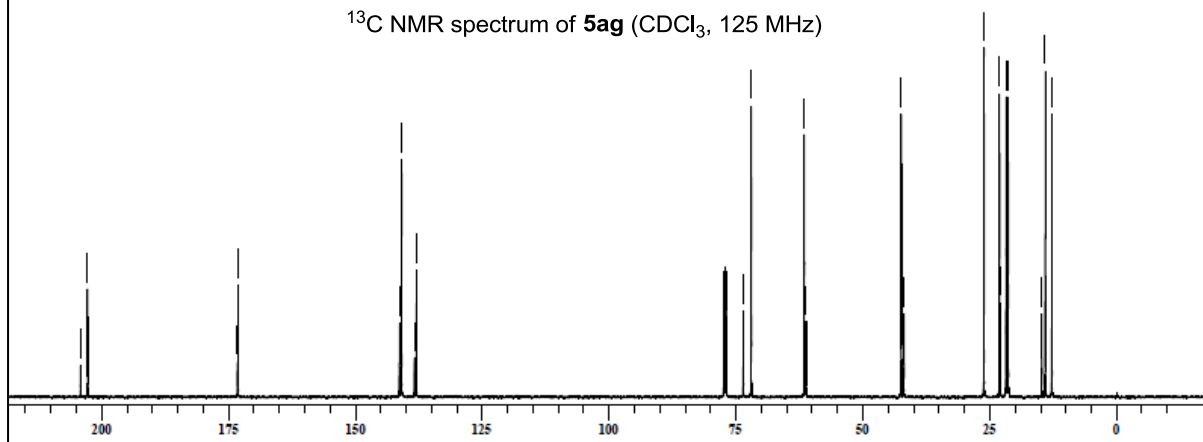



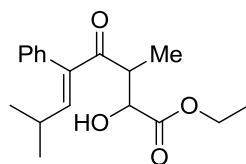

$^1\text{H}$  NMR spectrum of **5ah** ( $\text{CDCl}_3$ , 500 MHz)

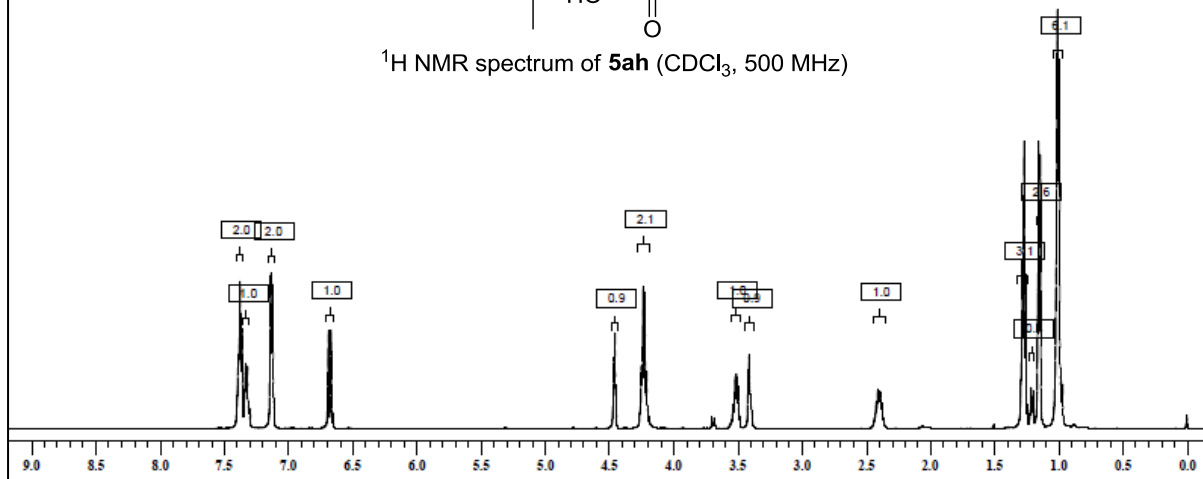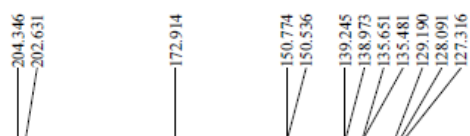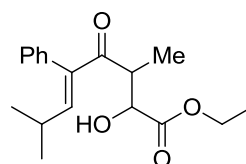

$^{13}\text{C}$  NMR spectrum of **5ah** ( $\text{CDCl}_3$ , 75 MHz)

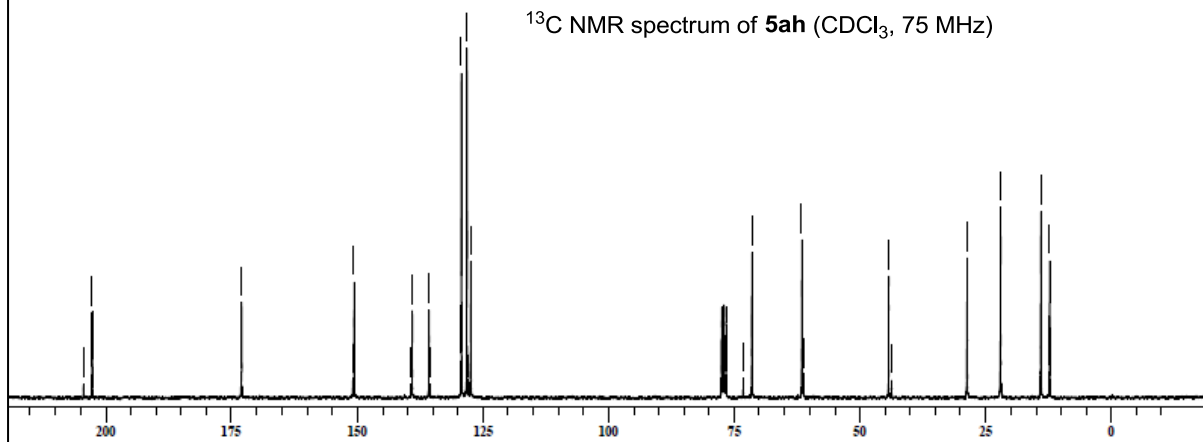

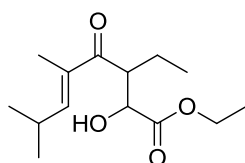

$^1\text{H}$  NMR spectrum of **5ai** ( $\text{CDCl}_3$ , 500 MHz)

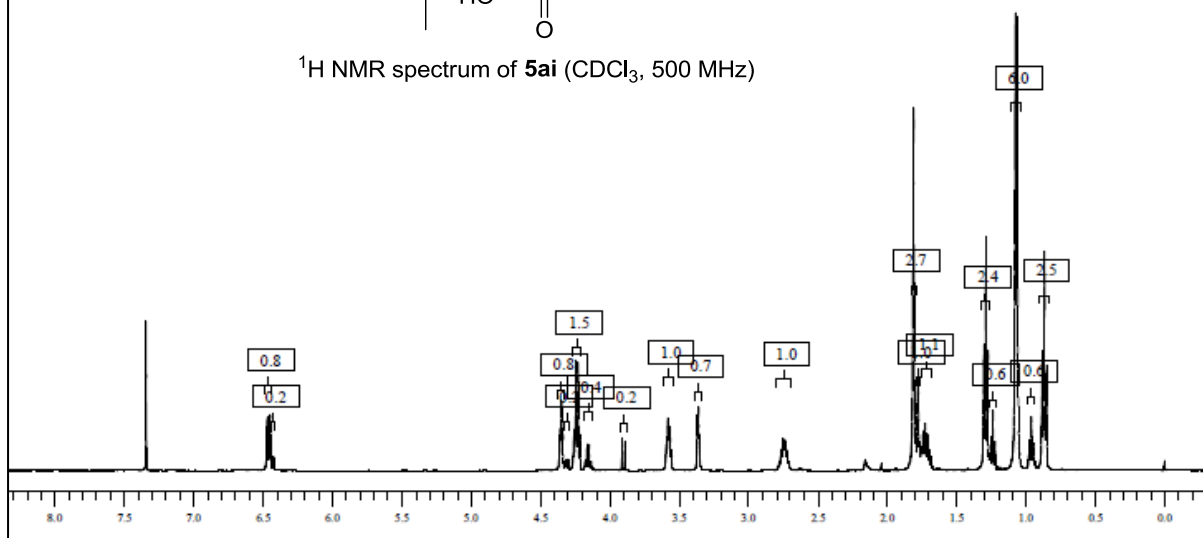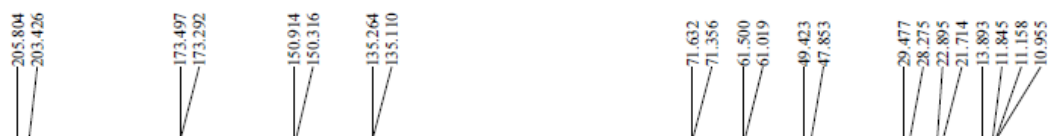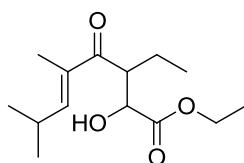

$^{13}\text{C}$  NMR spectrum of **5ai** ( $\text{CDCl}_3$ , 75 MHz)

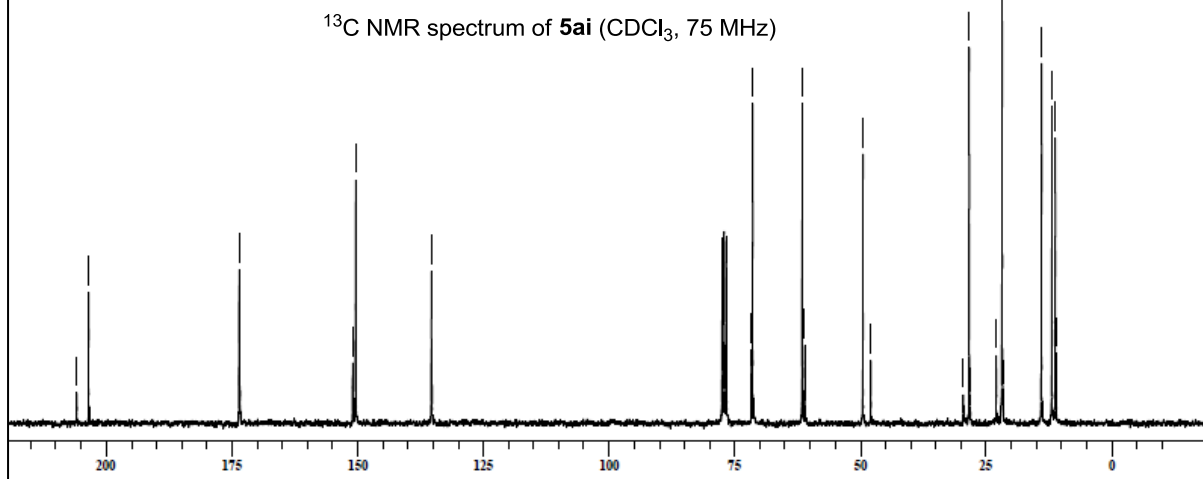

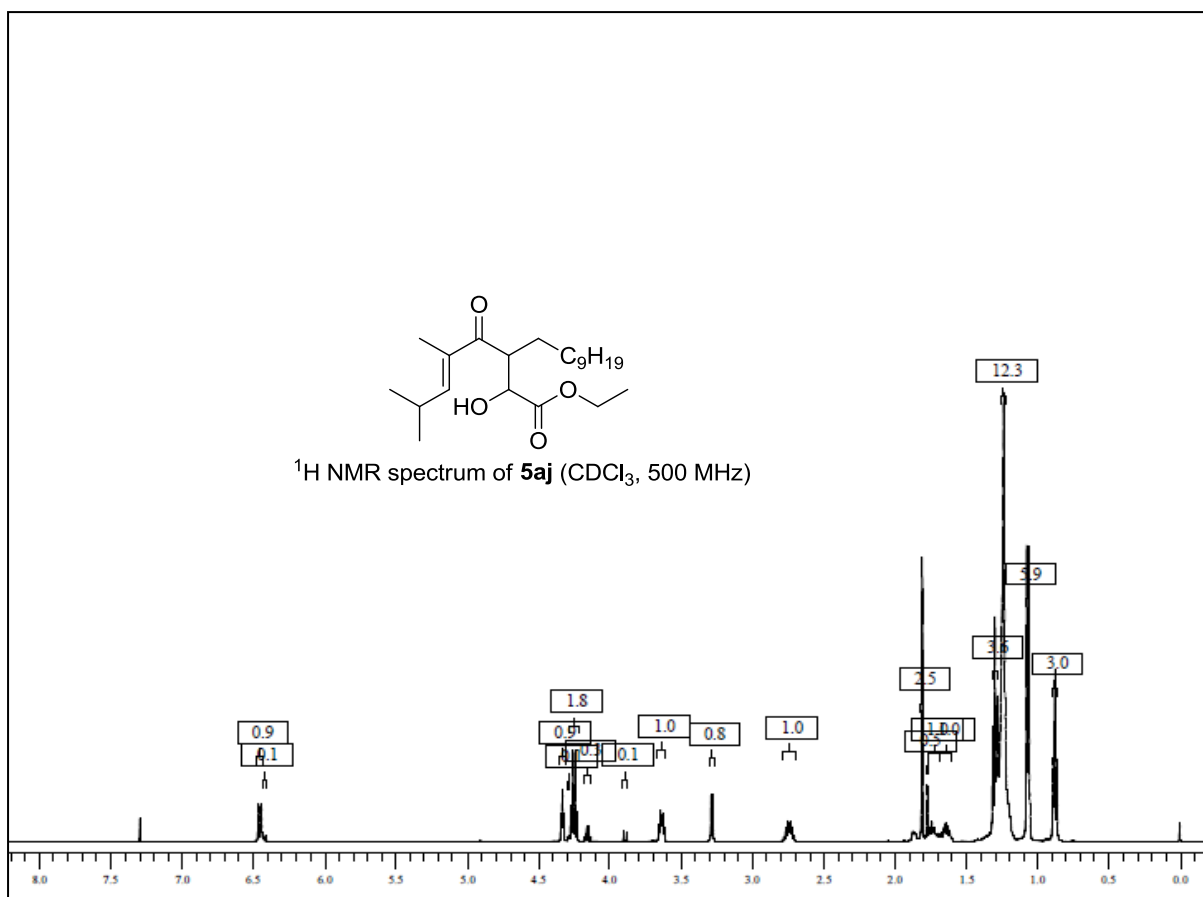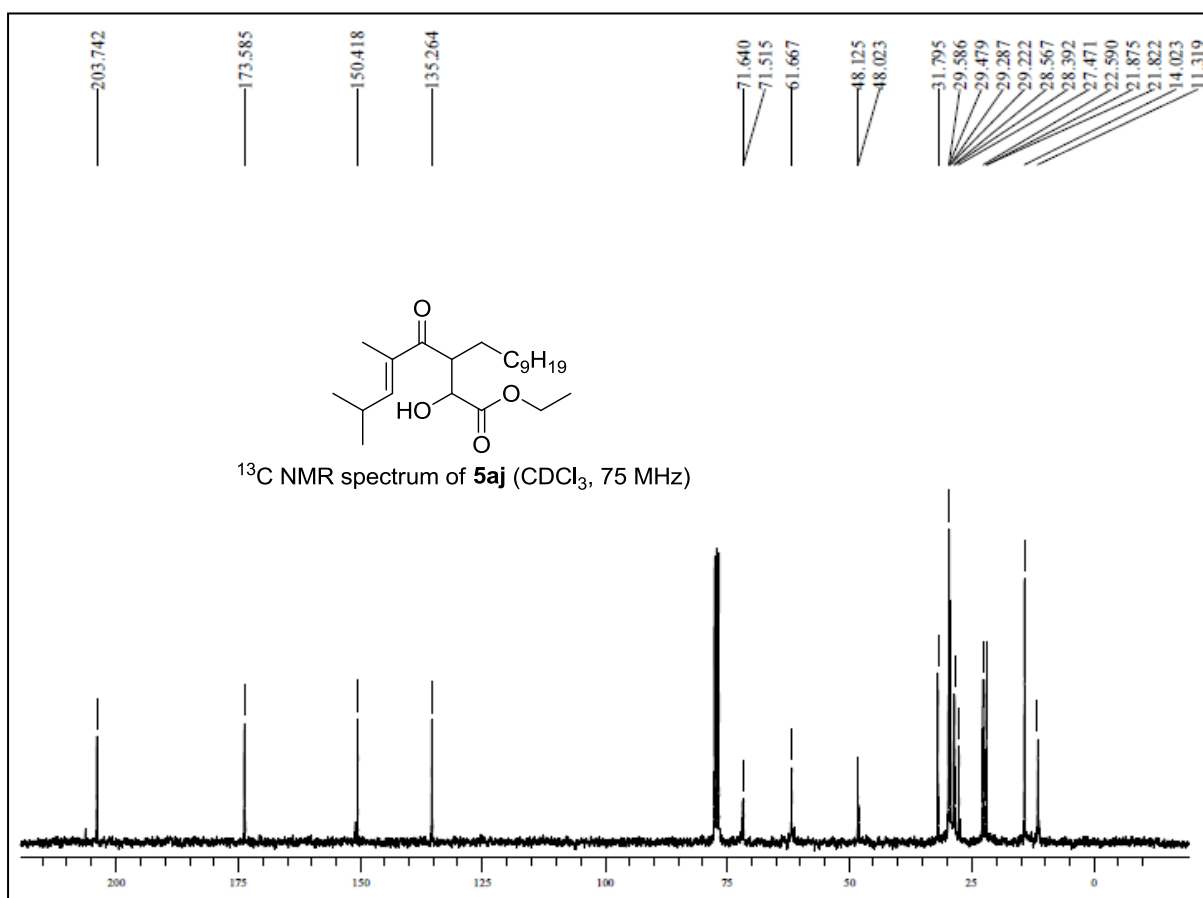

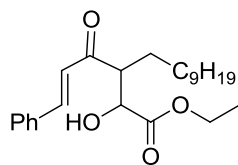

$^1\text{H}$  NMR spectrum of **5ak** ( $\text{CDCl}_3$ , 300 MHz)

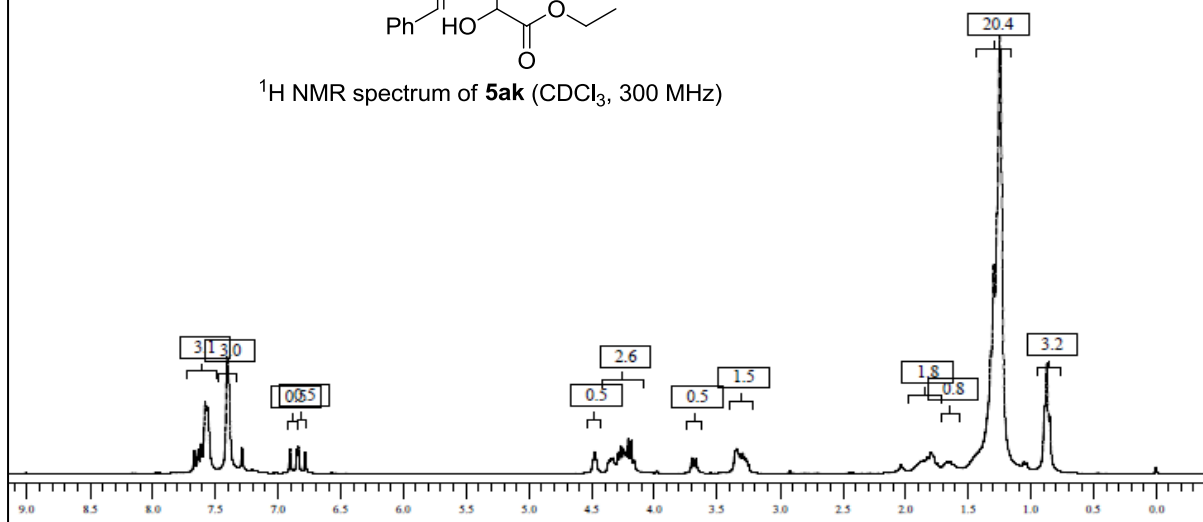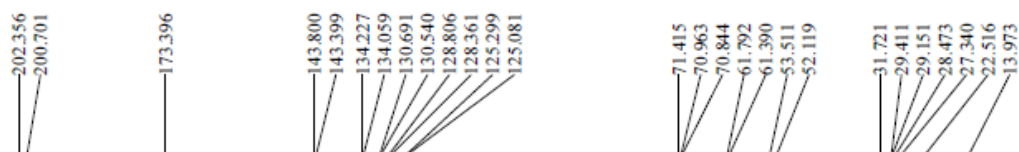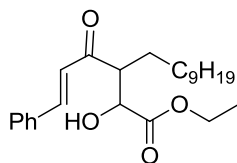

$^{13}\text{C}$  NMR spectrum of **5ak** ( $\text{CDCl}_3$ , 75 MHz)

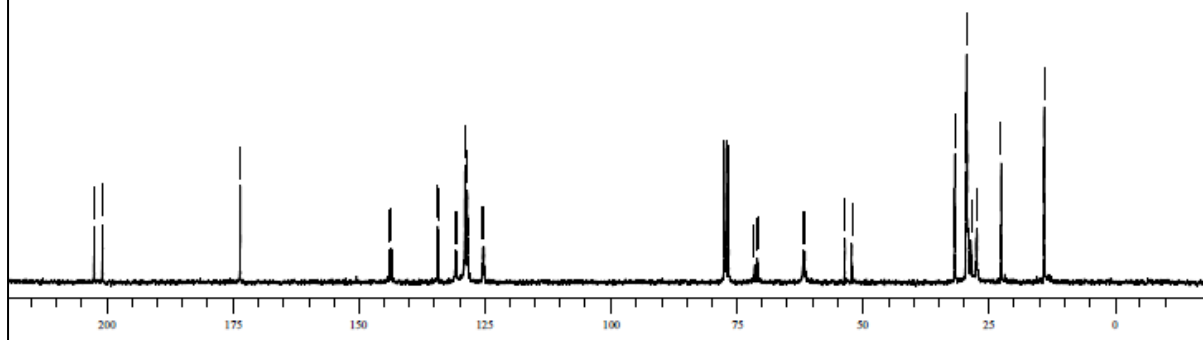

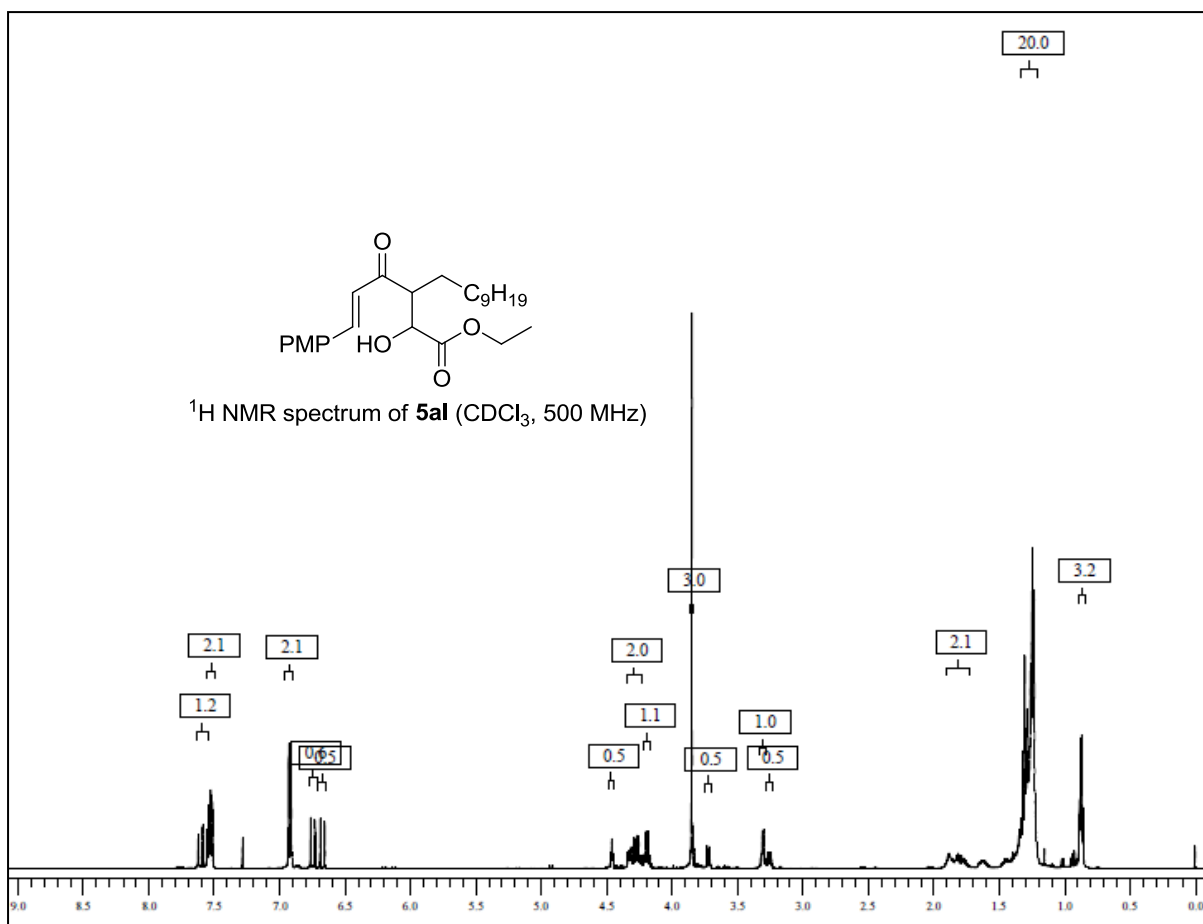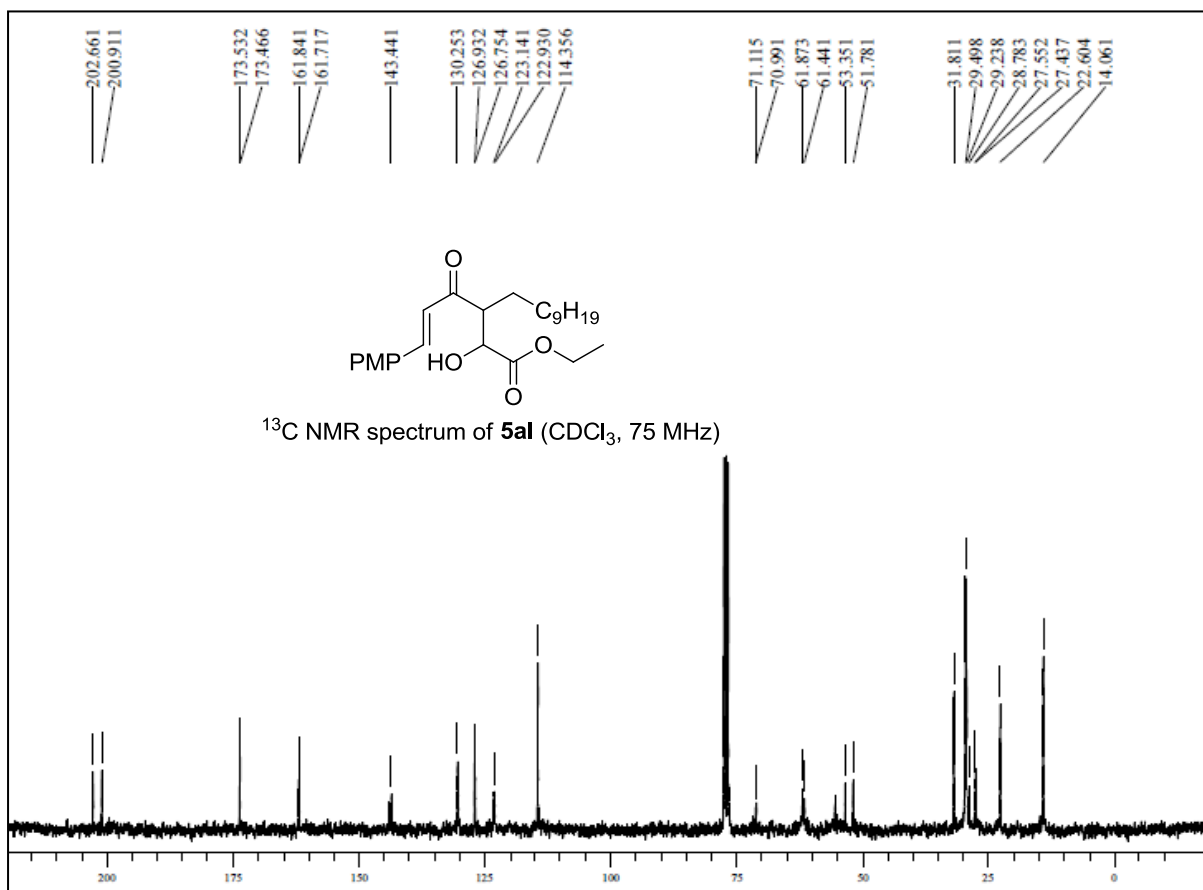

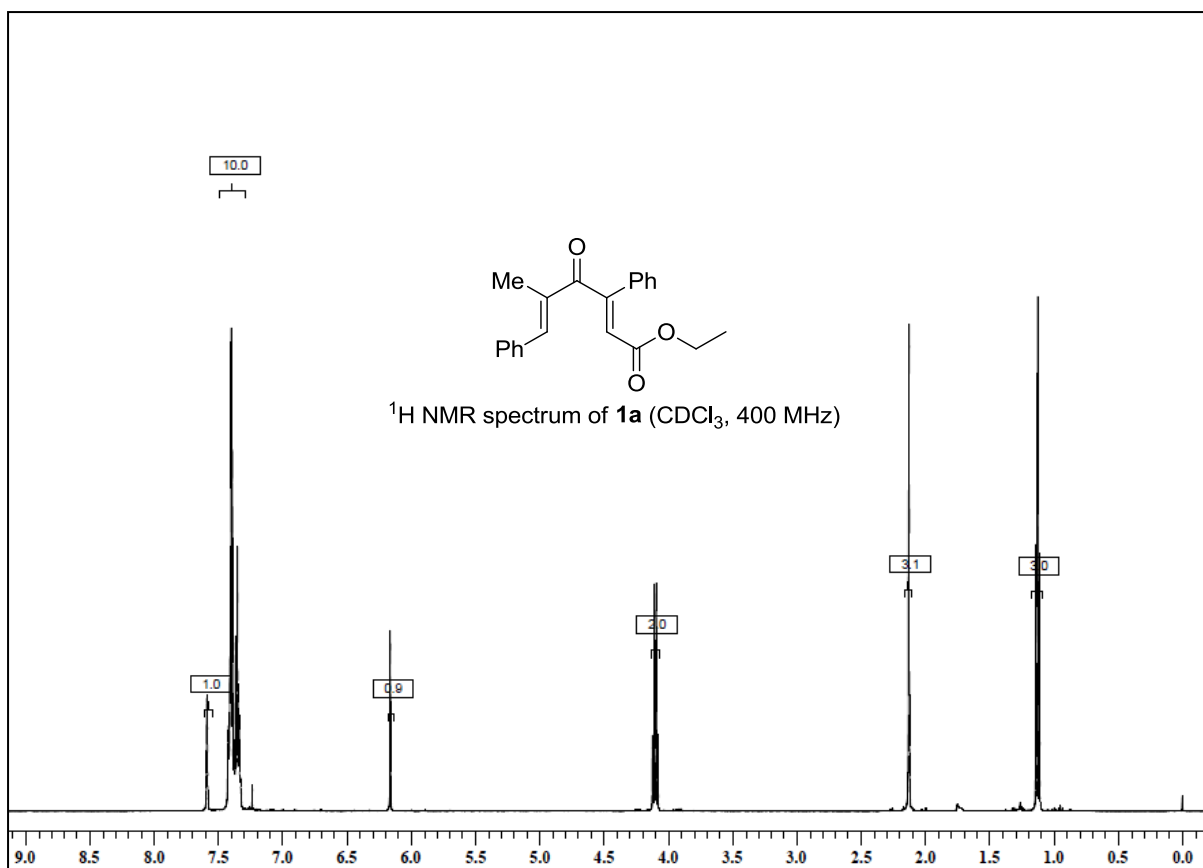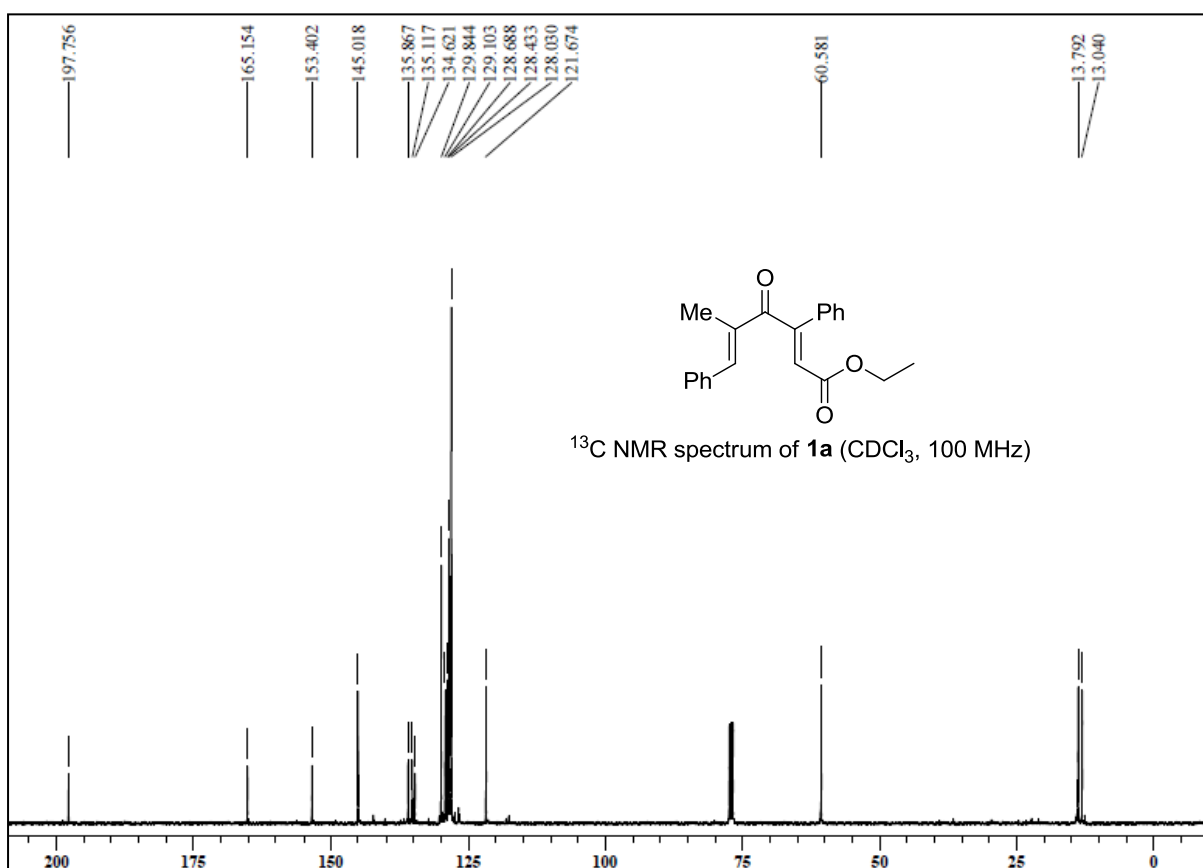

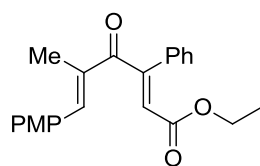

$^1\text{H}$  NMR spectrum of **1b** ( $\text{CDCl}_3$ , 500 MHz)

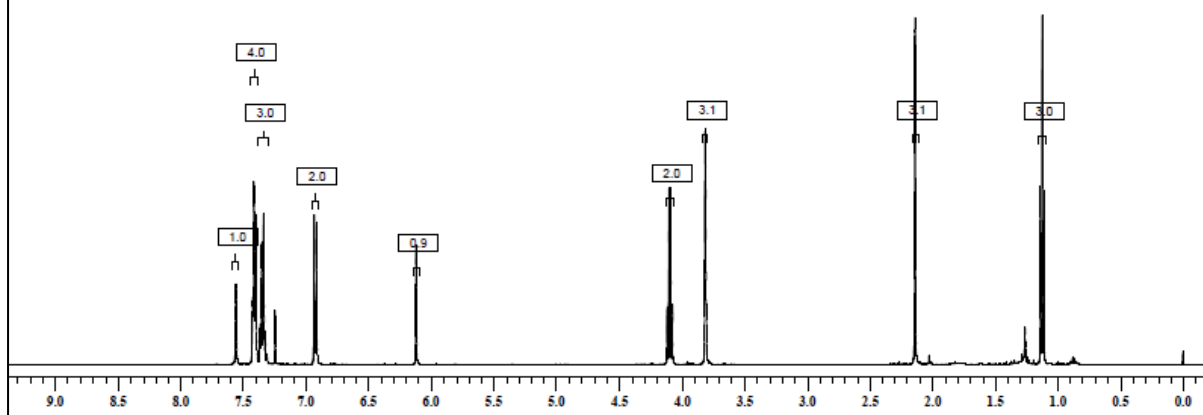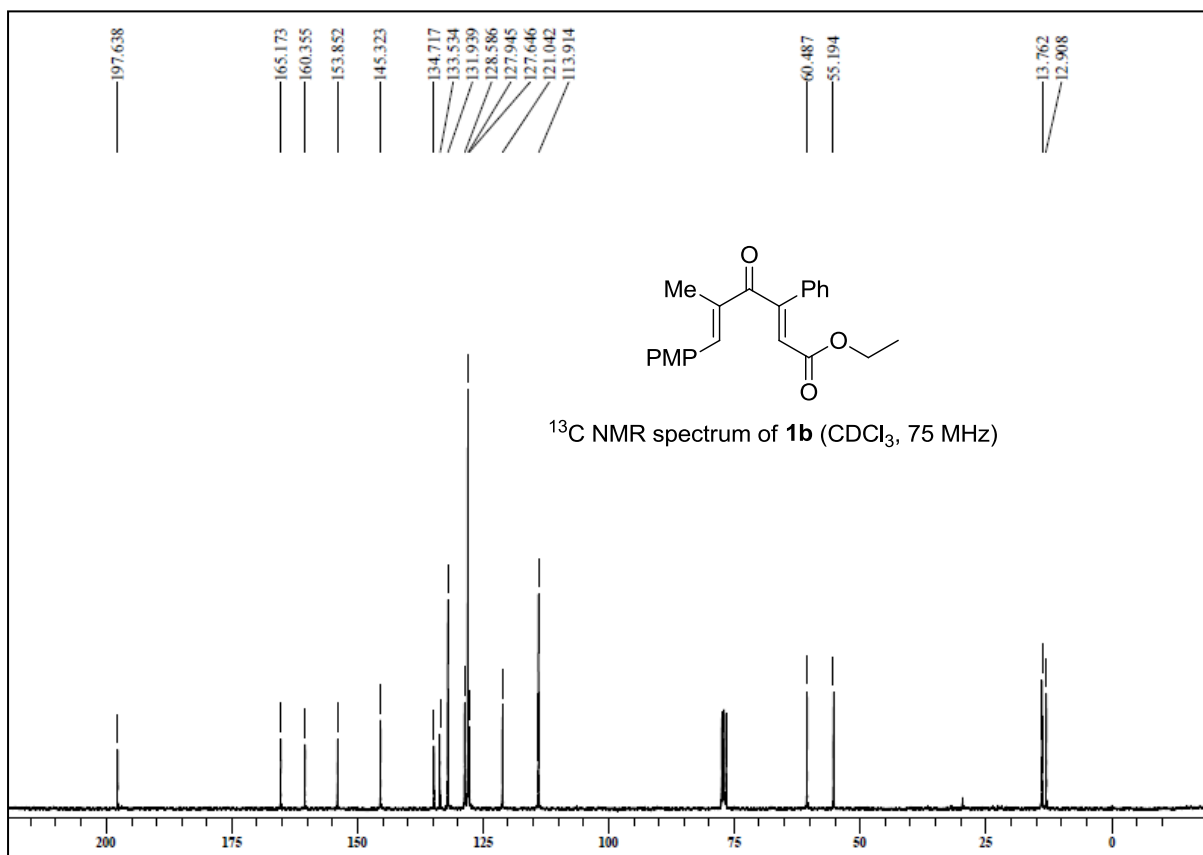

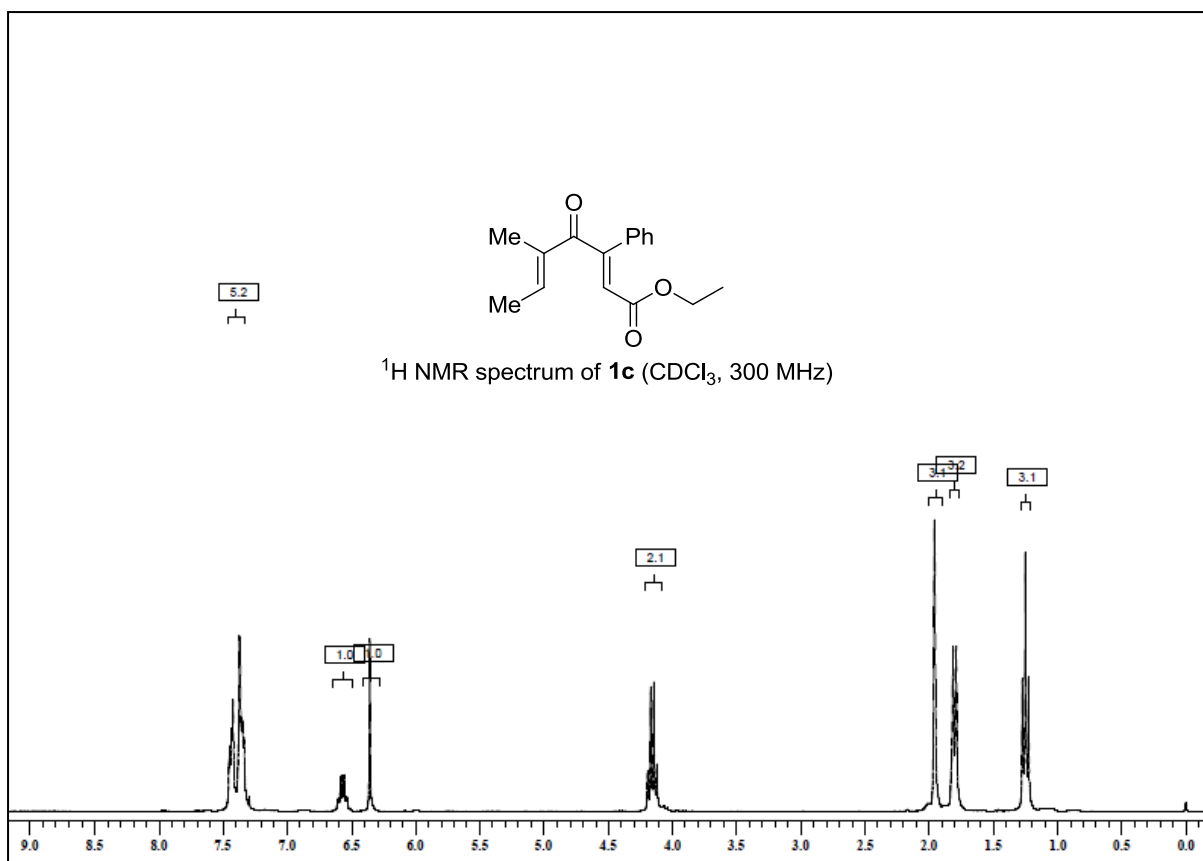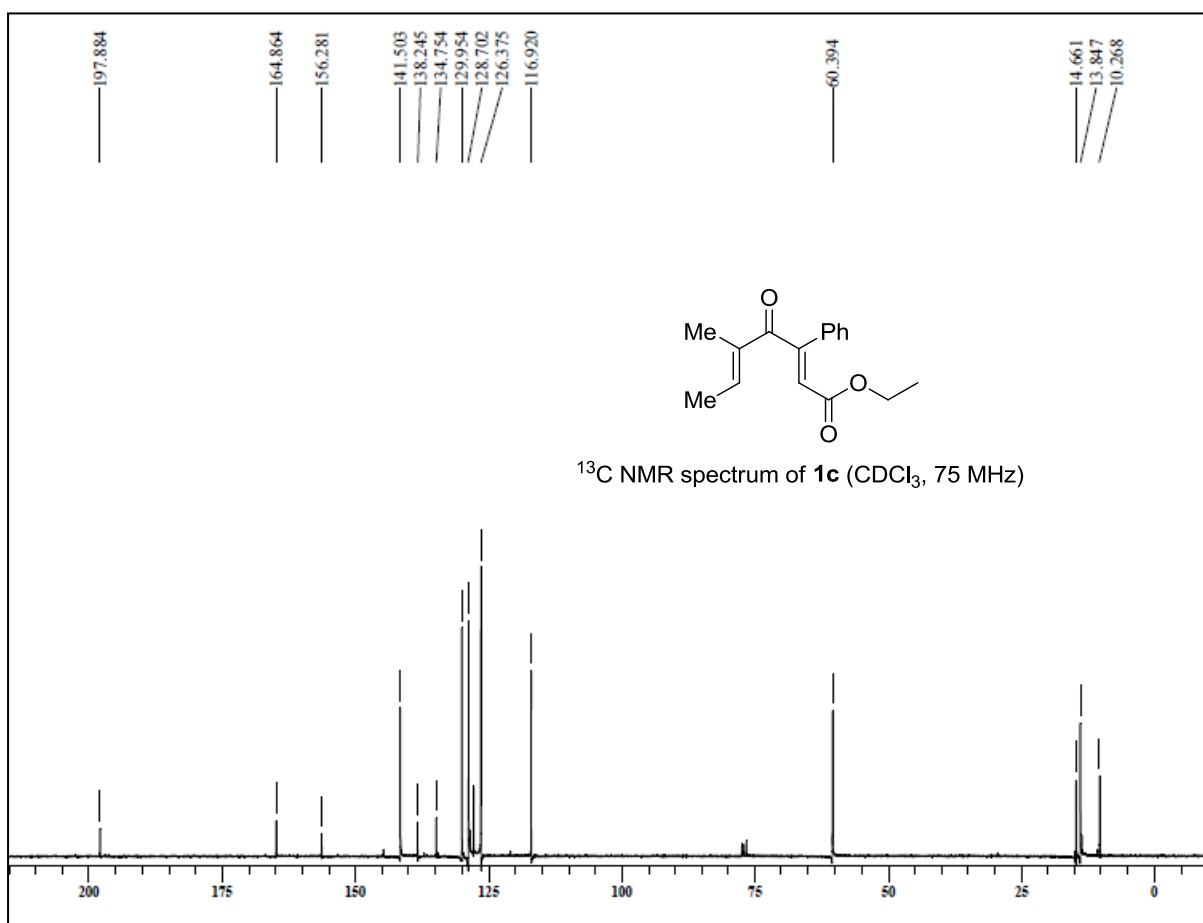



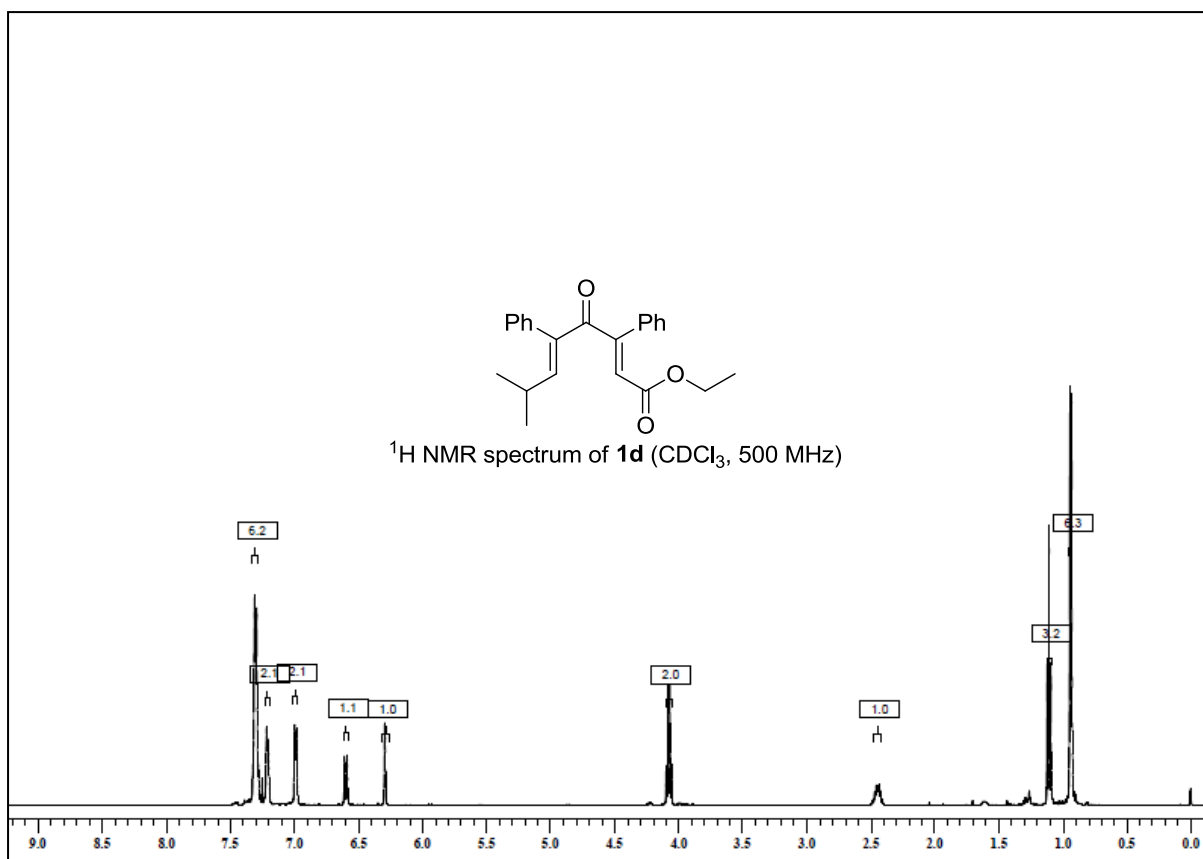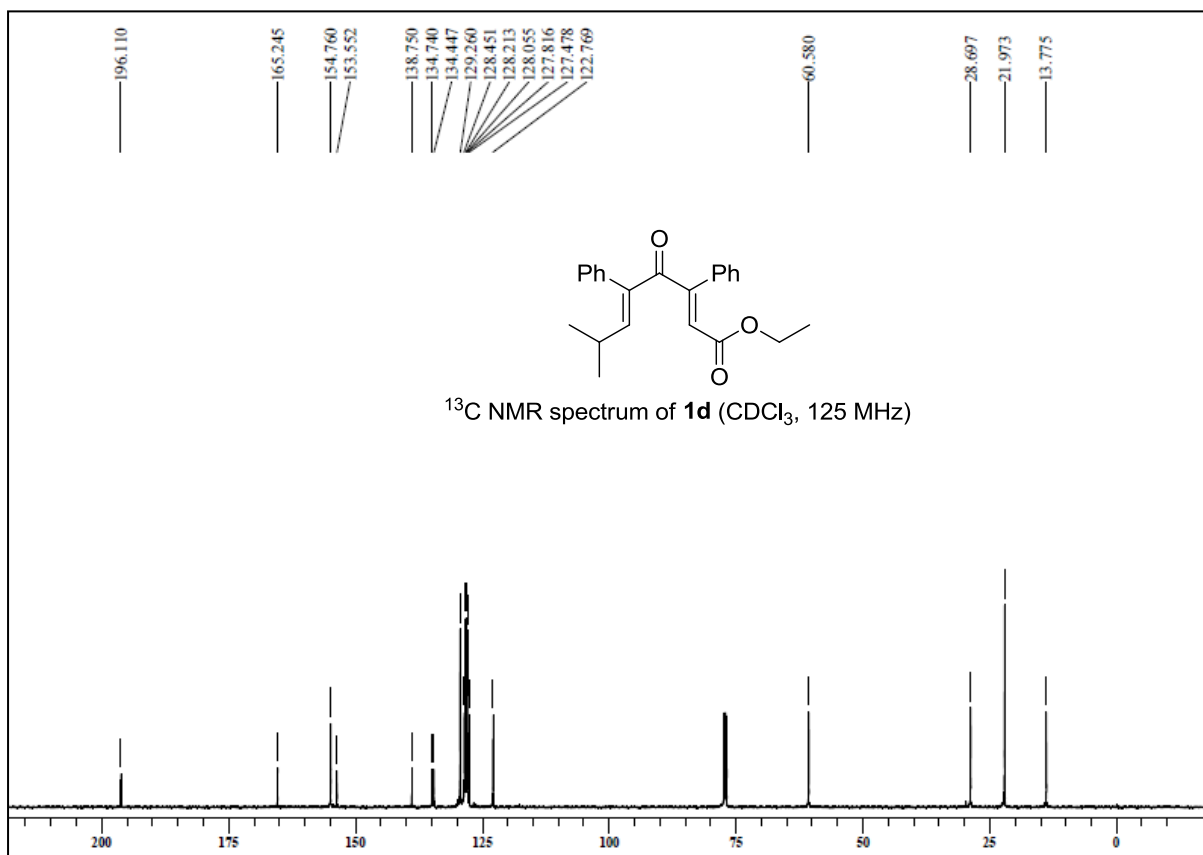

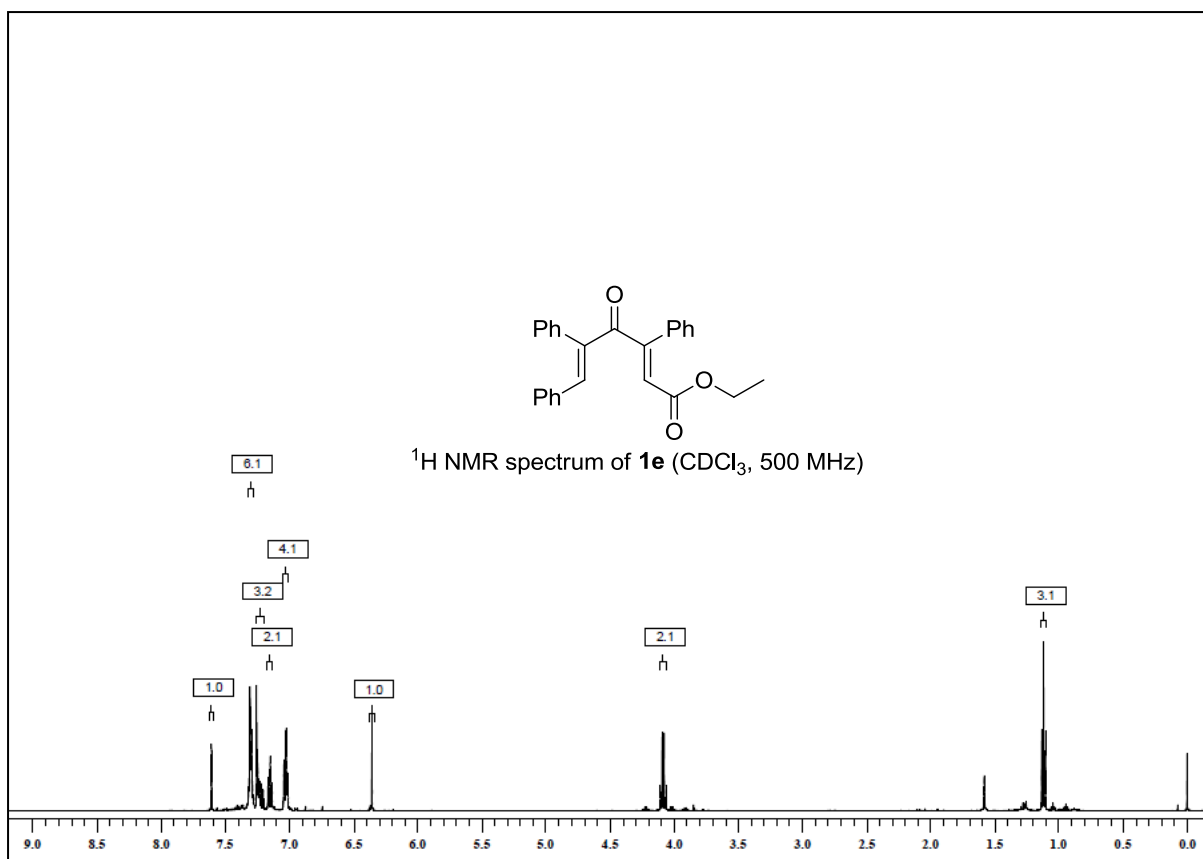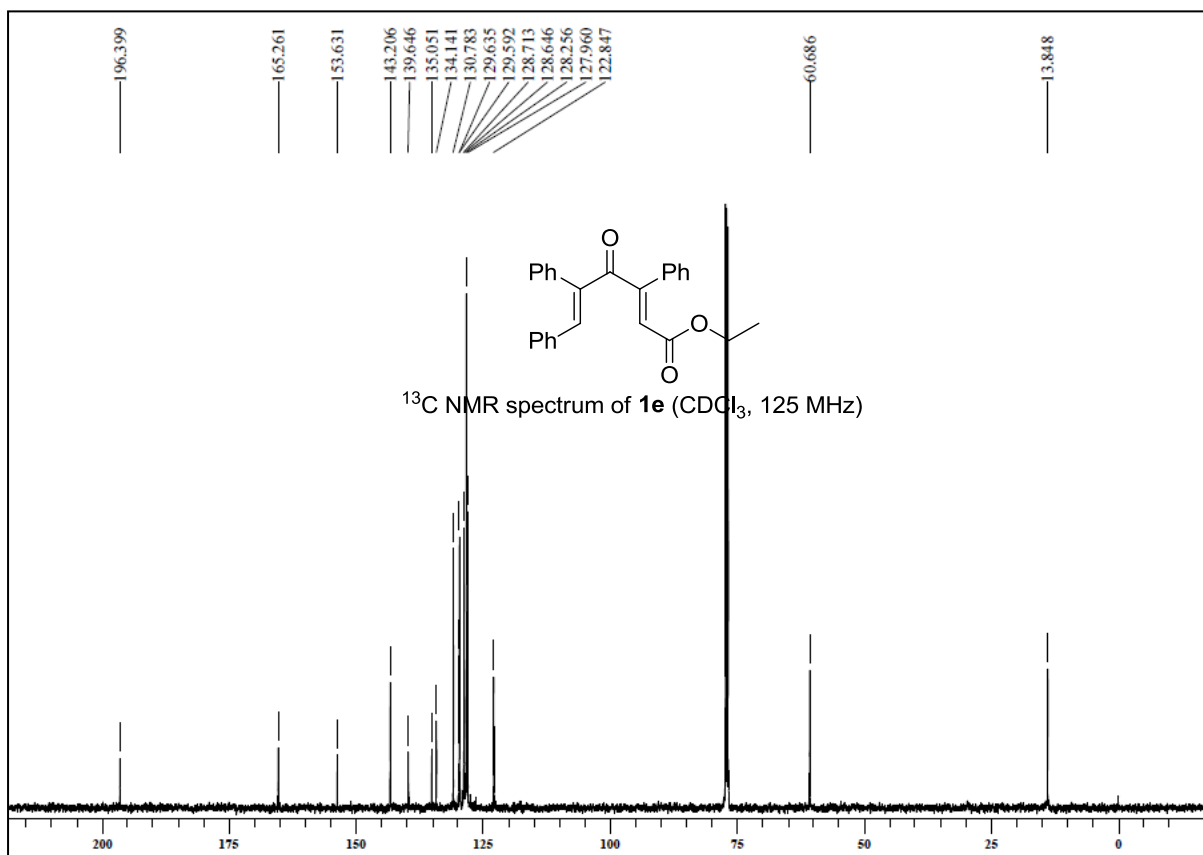

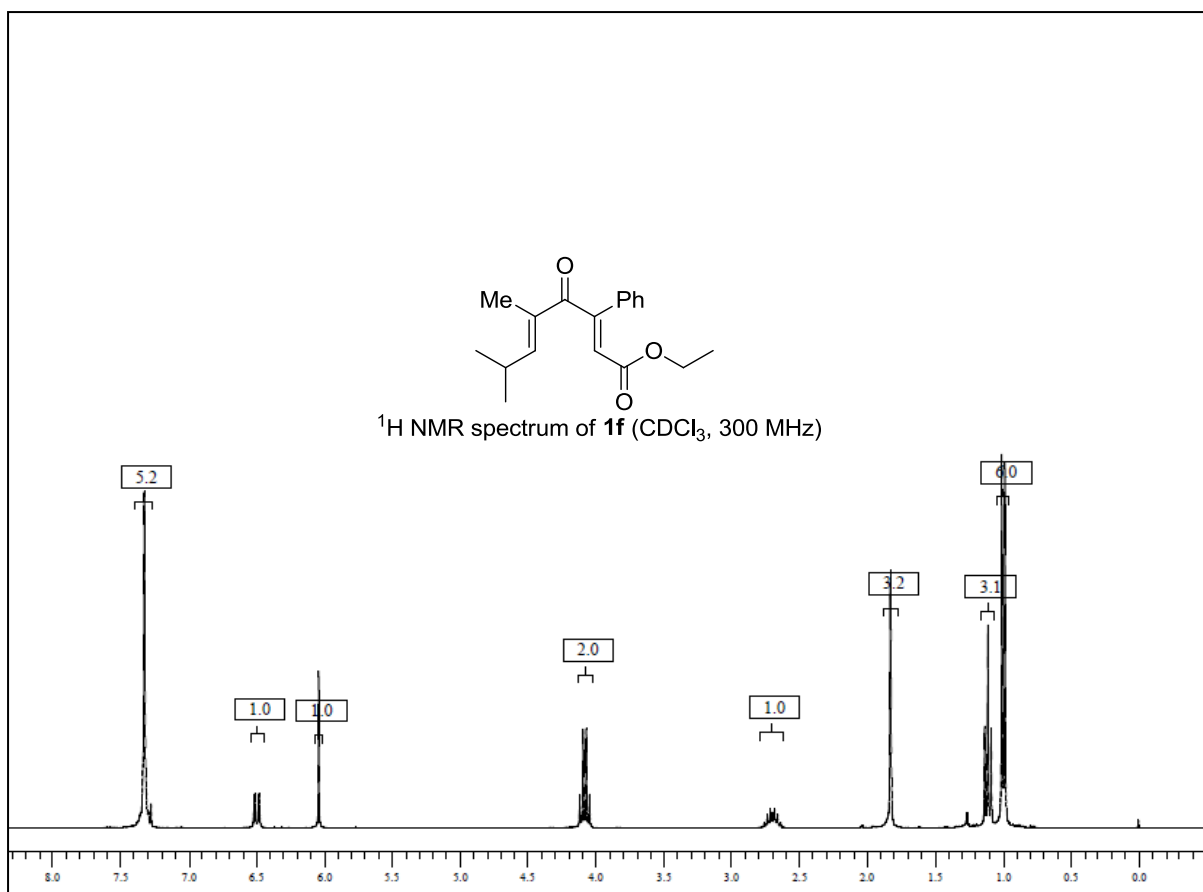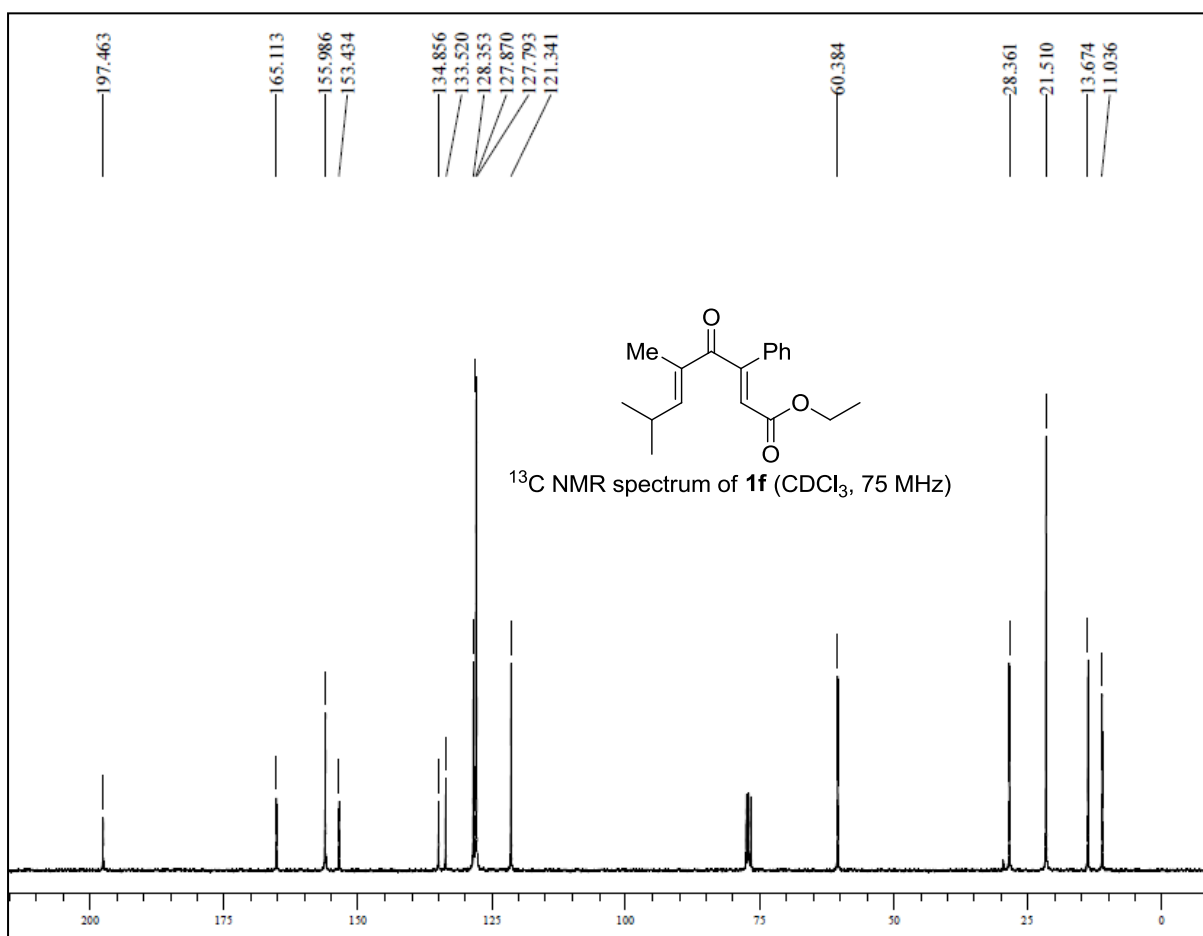

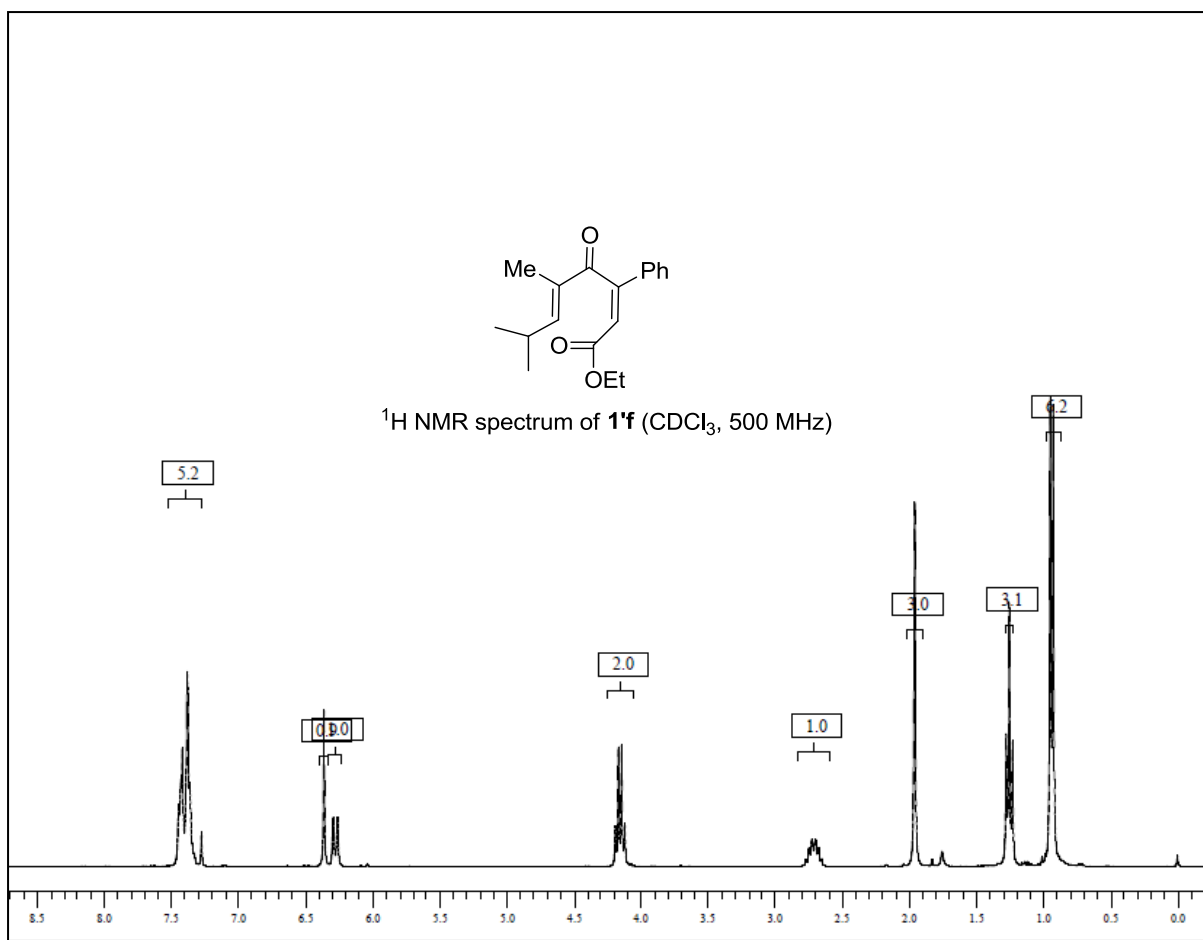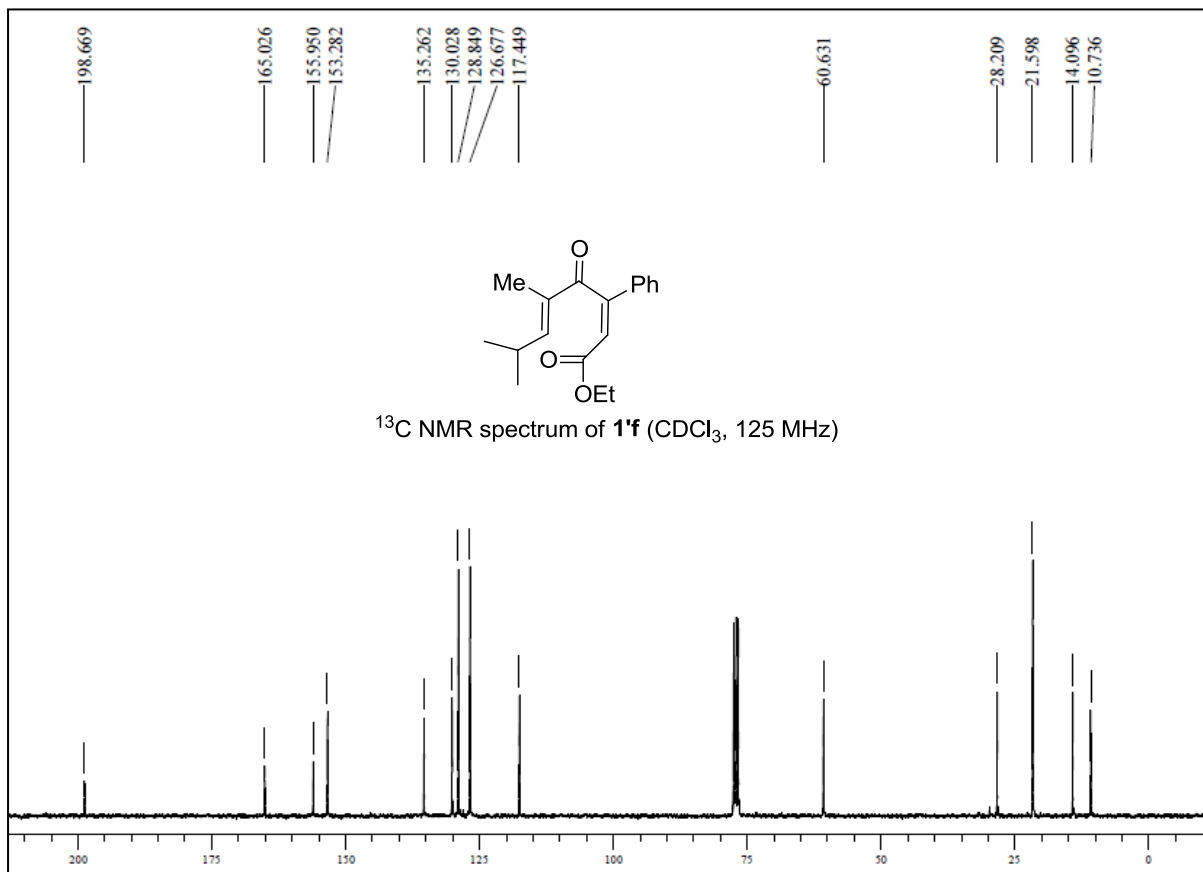

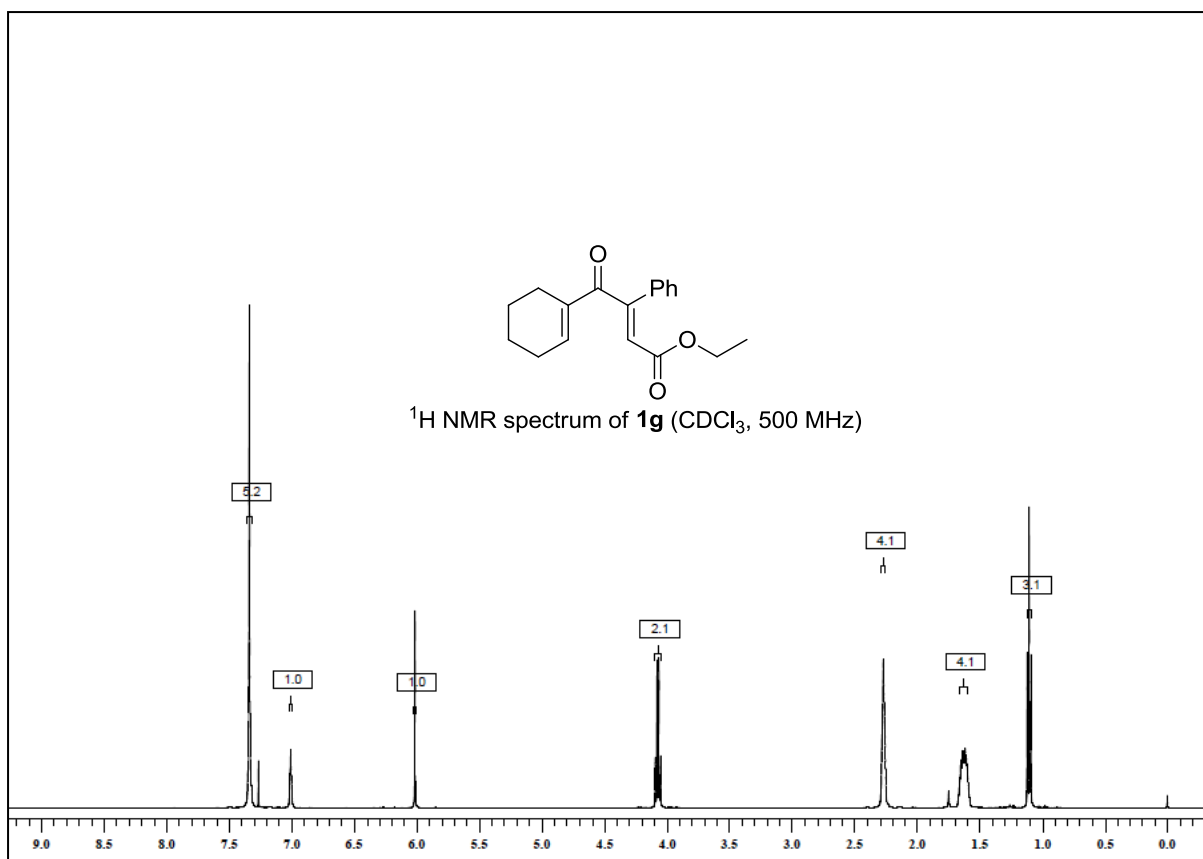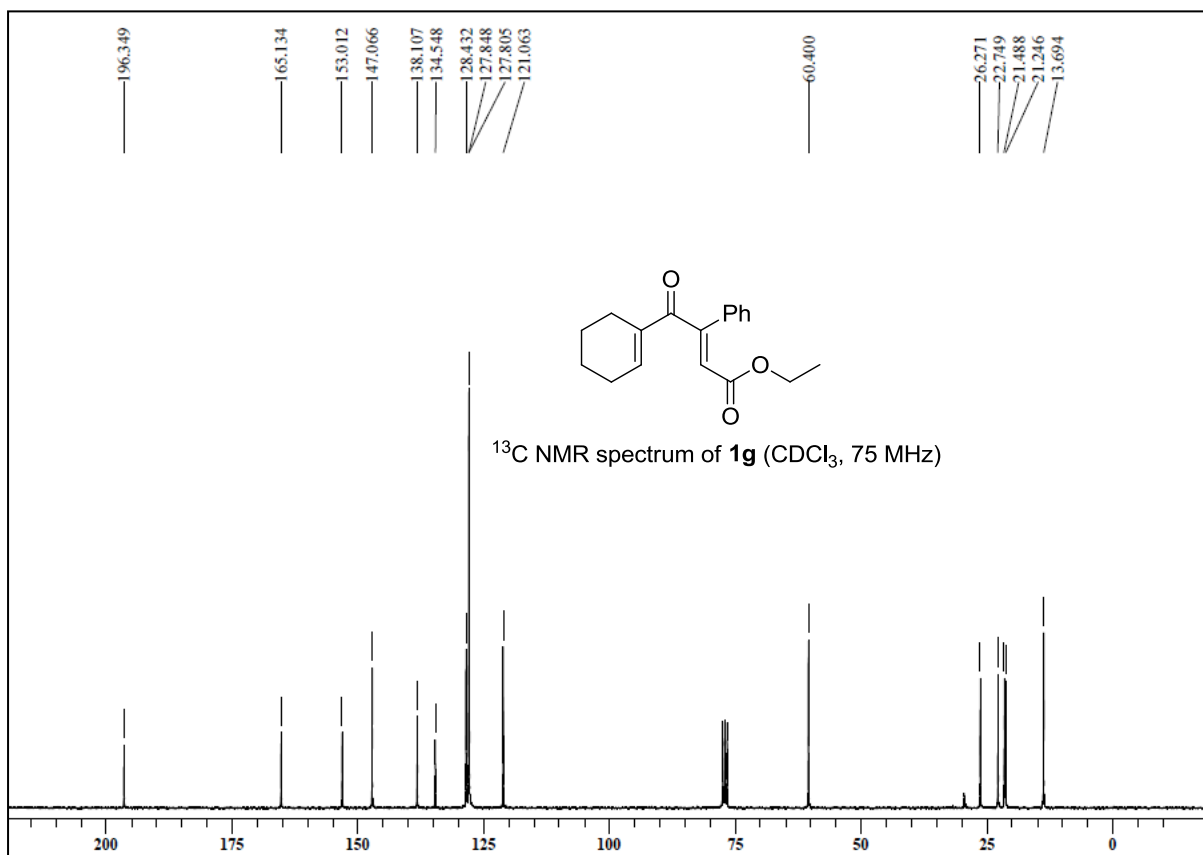

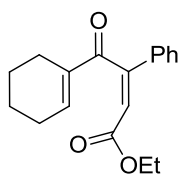

$^1\text{H}$  NMR spectrum of **1'g** ( $\text{CDCl}_3$ , 300 MHz)

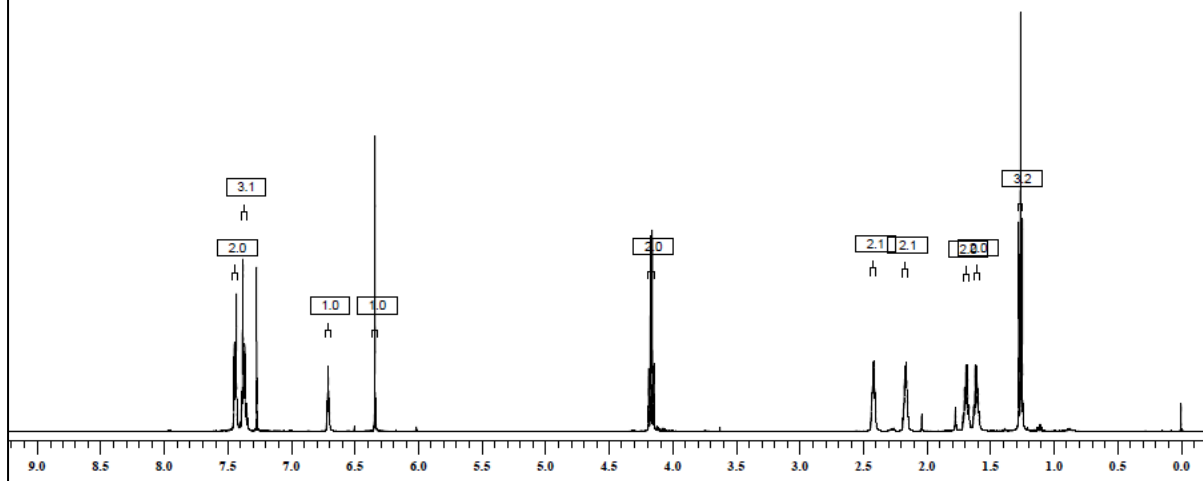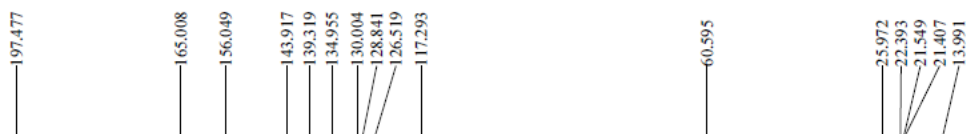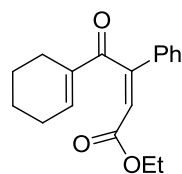

$^{13}\text{C}$  NMR spectrum of **1'g** ( $\text{CDCl}_3$ , 75 MHz)

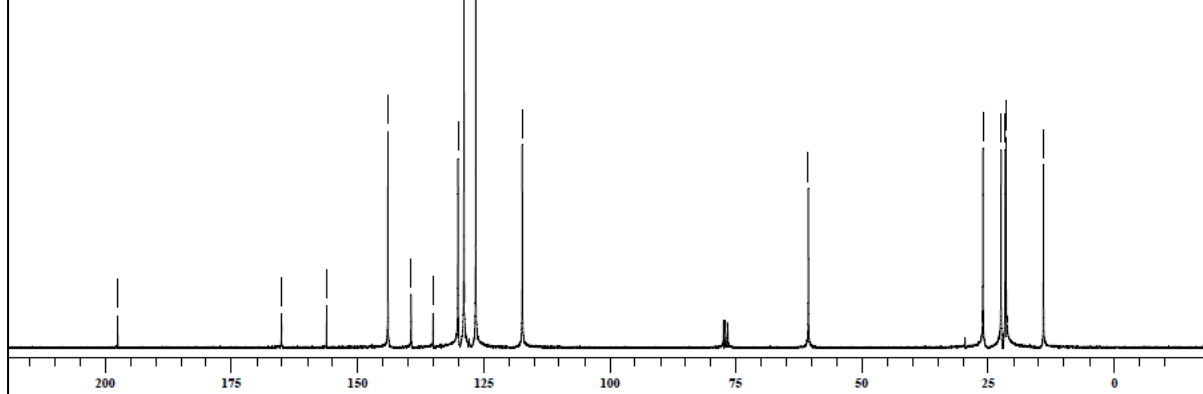

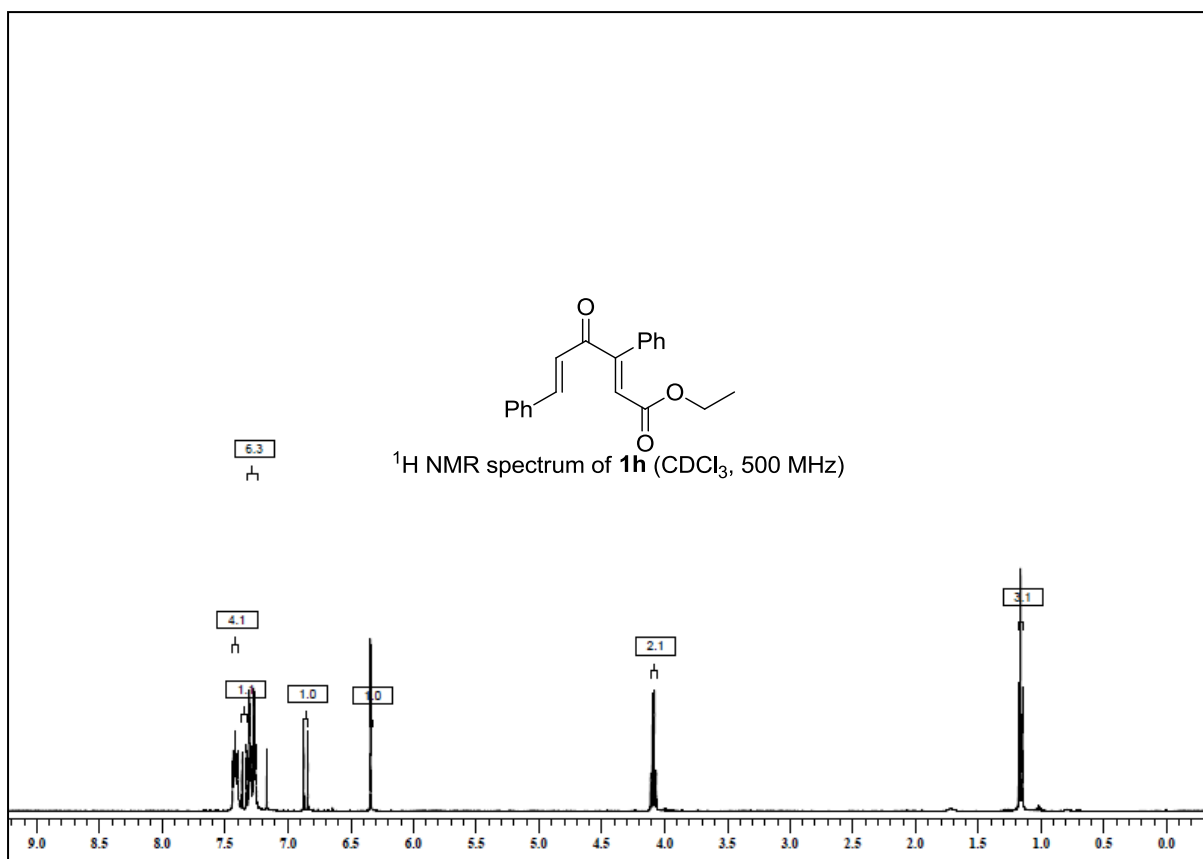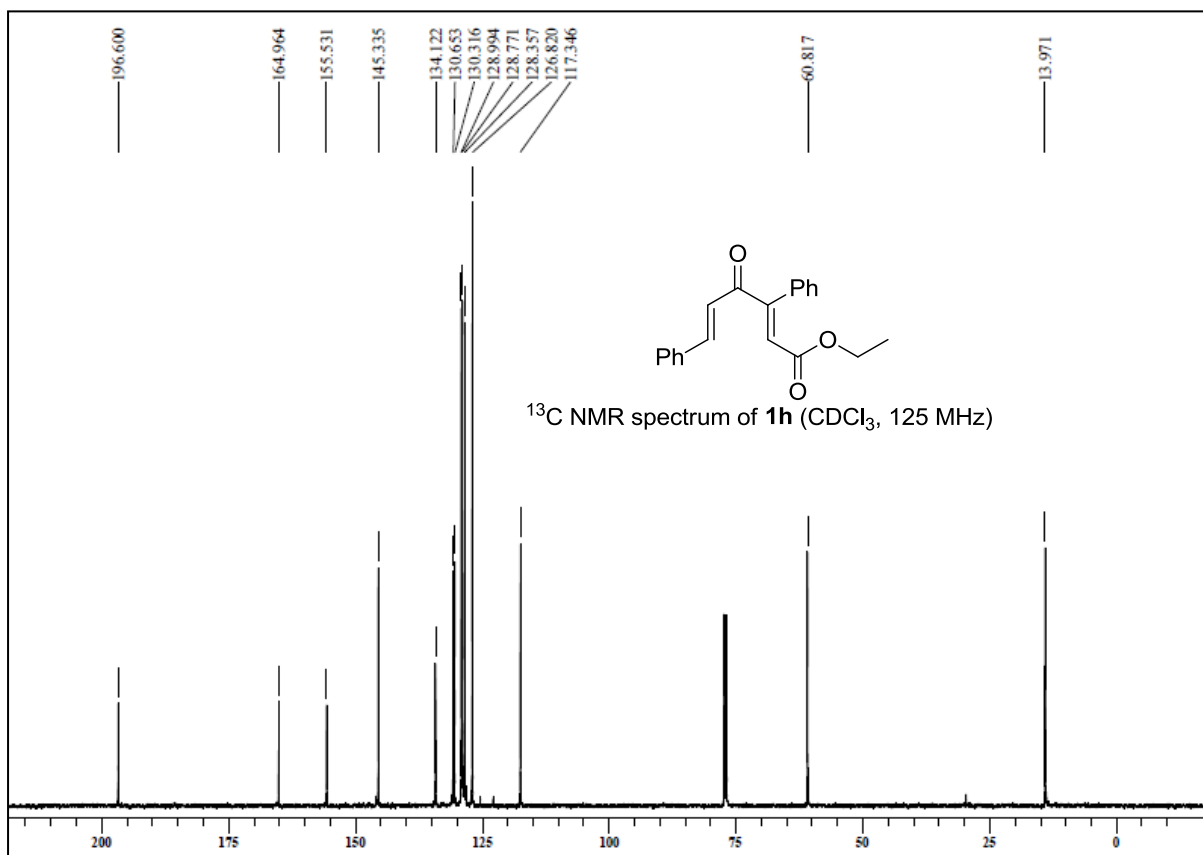

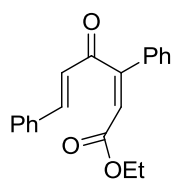

$^1\text{H}$  NMR spectrum of **1'h** ( $\text{CDCl}_3$ , 500 MHz)

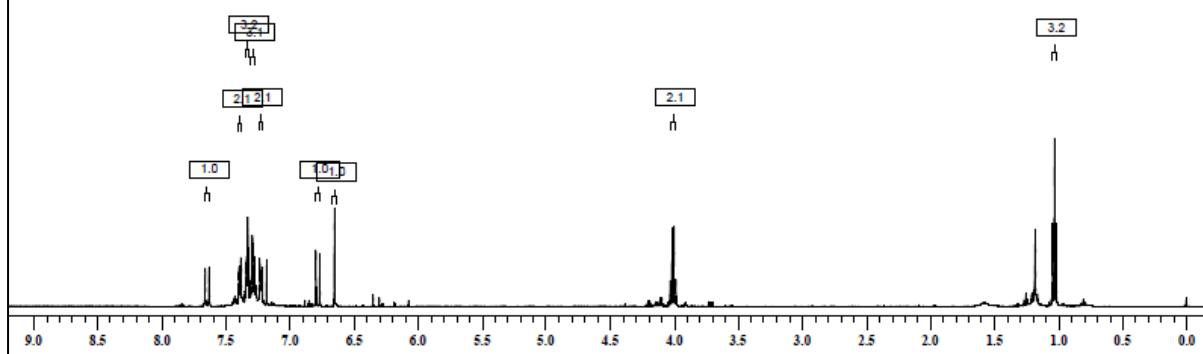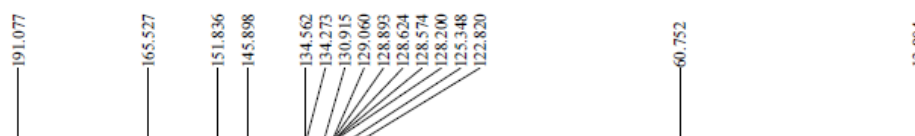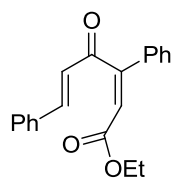

$^{13}\text{C}$  NMR spectrum of **1'h** ( $\text{CDCl}_3$ , 125 MHz)

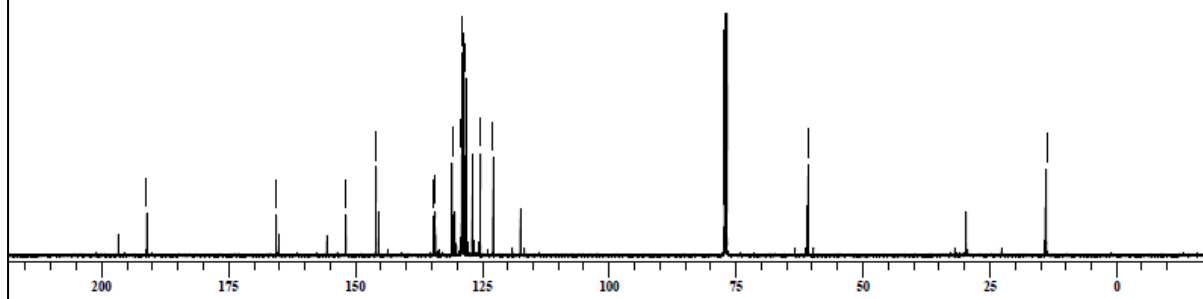



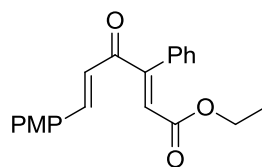

$^1\text{H}$  NMR spectrum of **1i** ( $\text{CDCl}_3$ , 500 MHz)

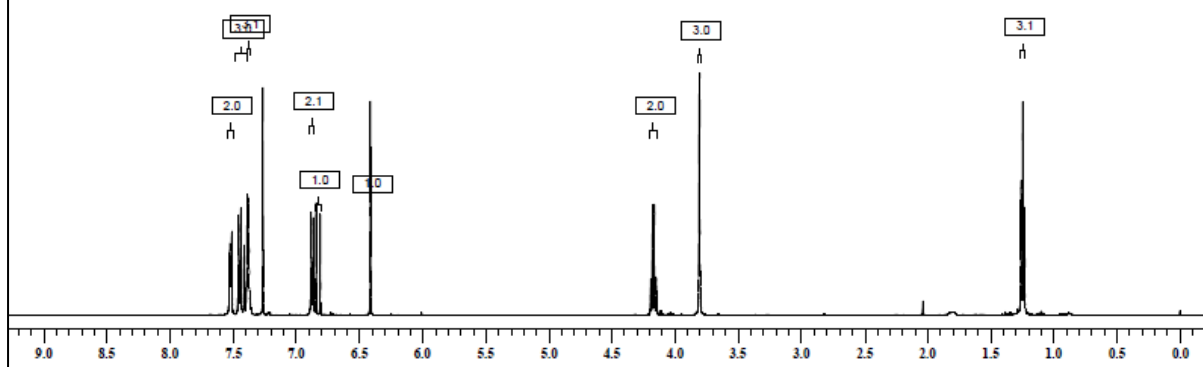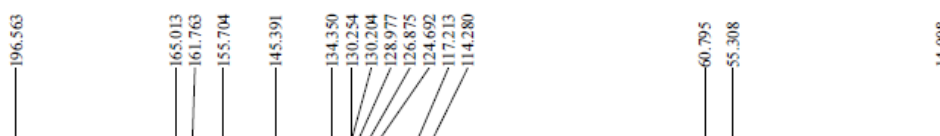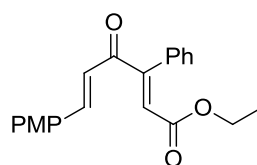

$^{13}\text{C}$  NMR spectrum of **1i** ( $\text{CDCl}_3$ , 125 MHz)

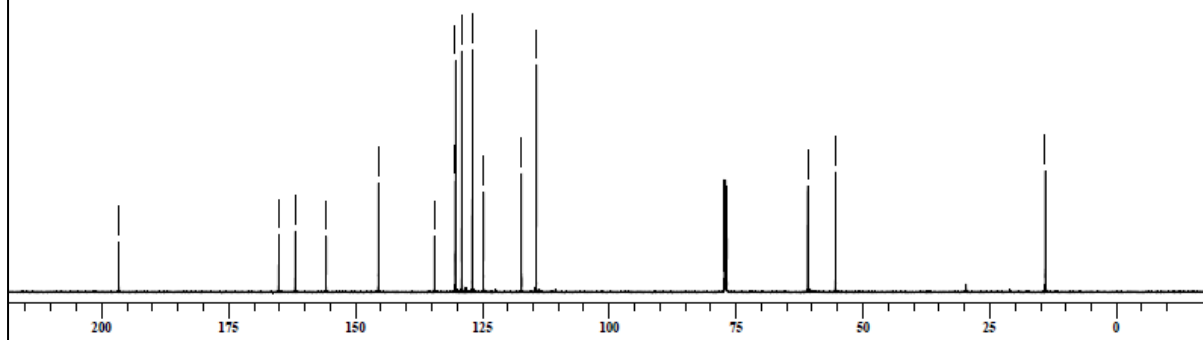

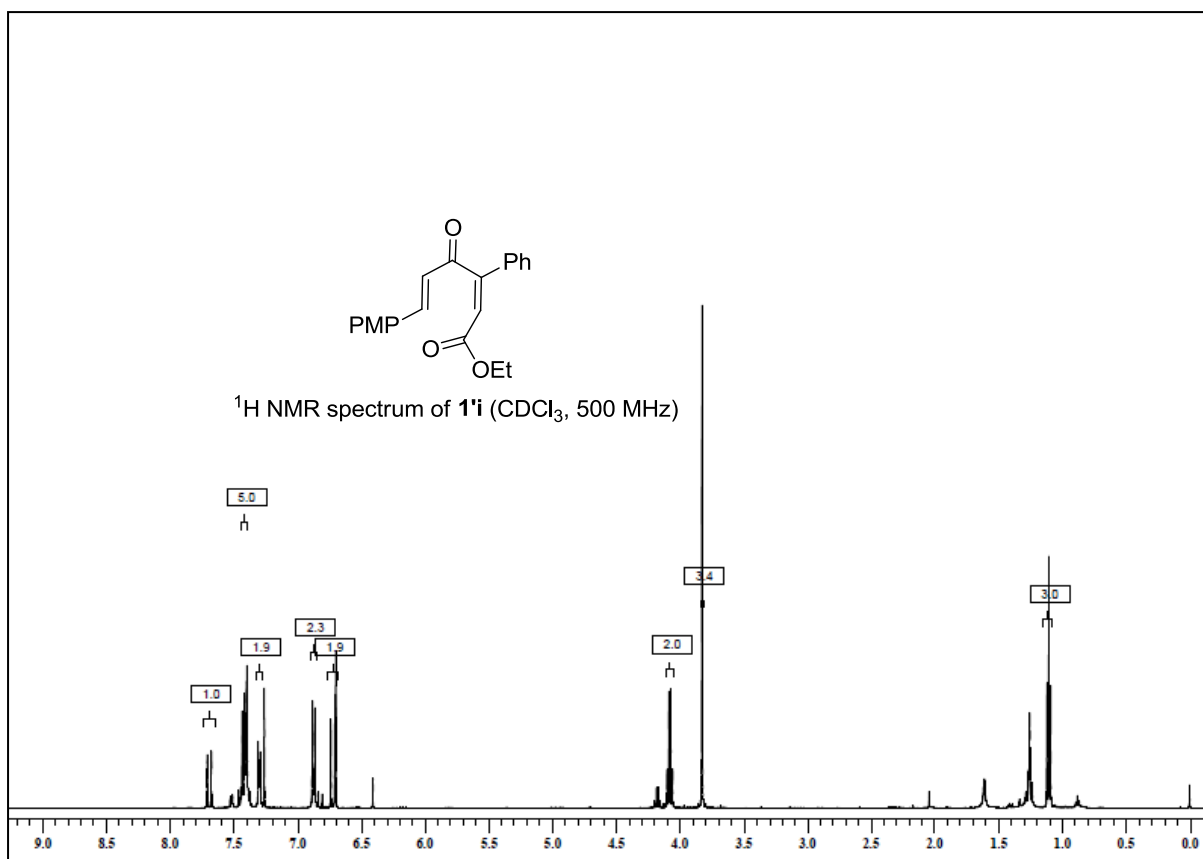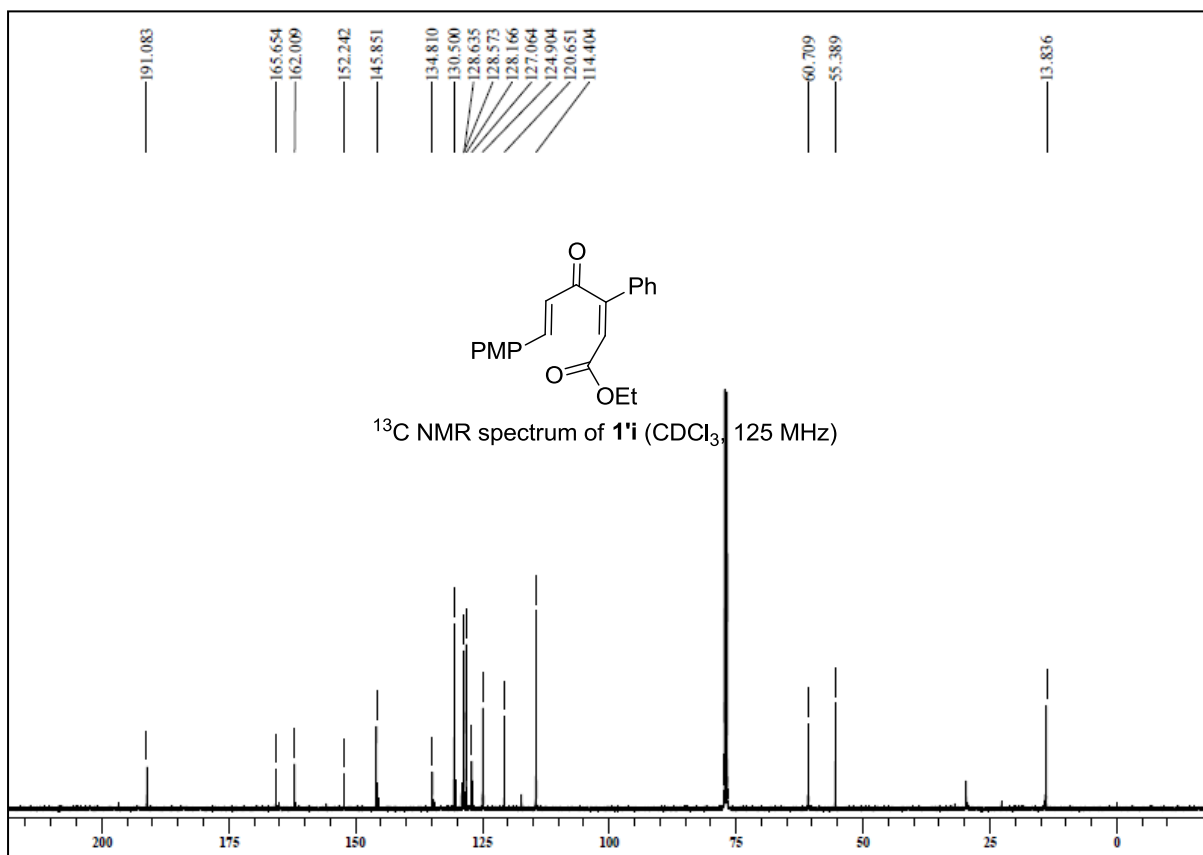

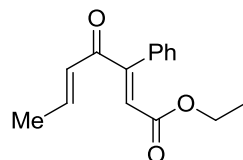

$^1\text{H}$  NMR spectrum of **1j** ( $\text{CDCl}_3$ , 500 MHz)

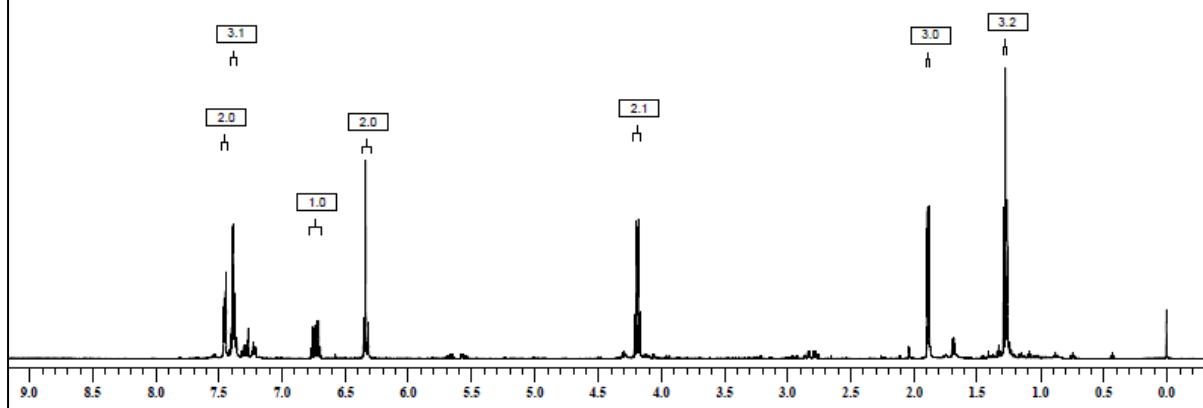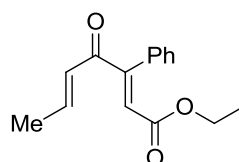

$^{13}\text{C}$  NMR spectrum of **1j** ( $\text{CDCl}_3$ , 75 MHz)

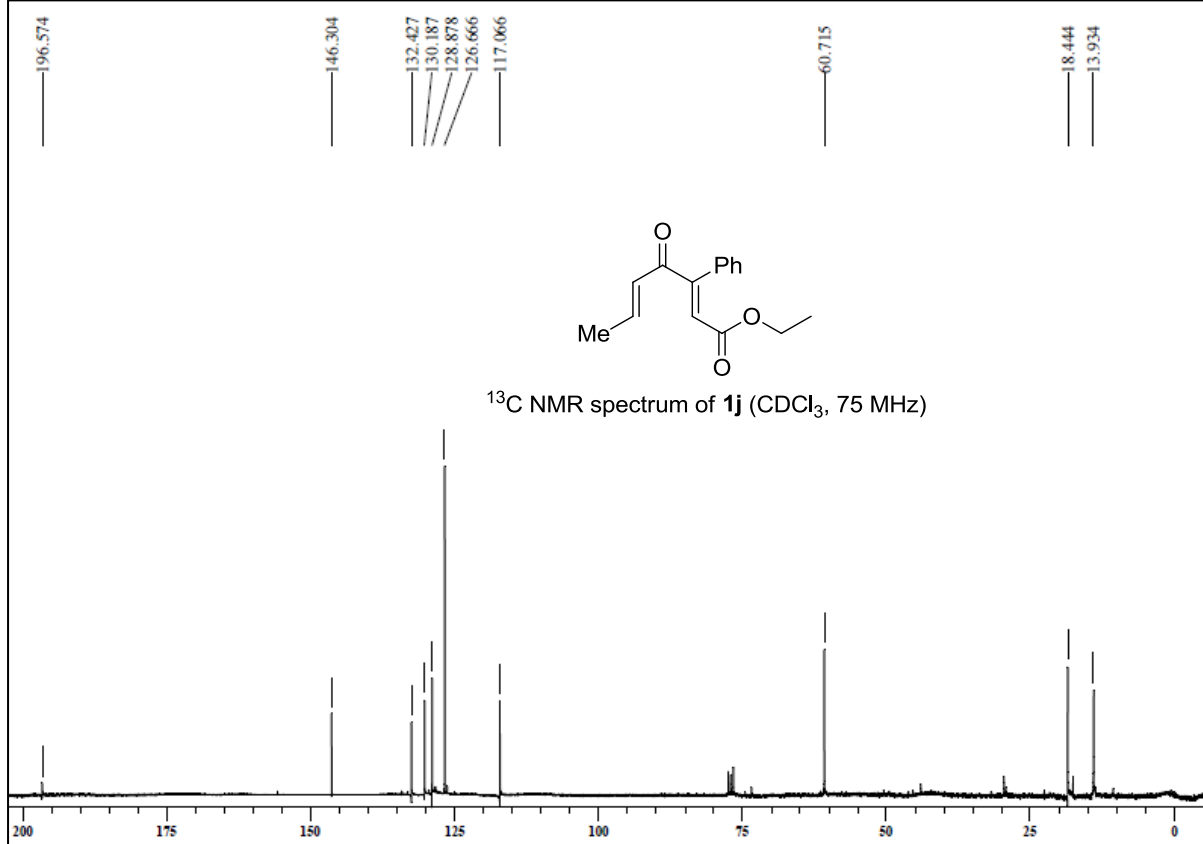

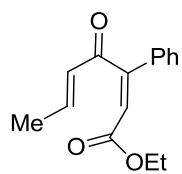

$^1\text{H}$  NMR spectrum of **1j** ( $\text{CDCl}_3$ , 500 MHz)

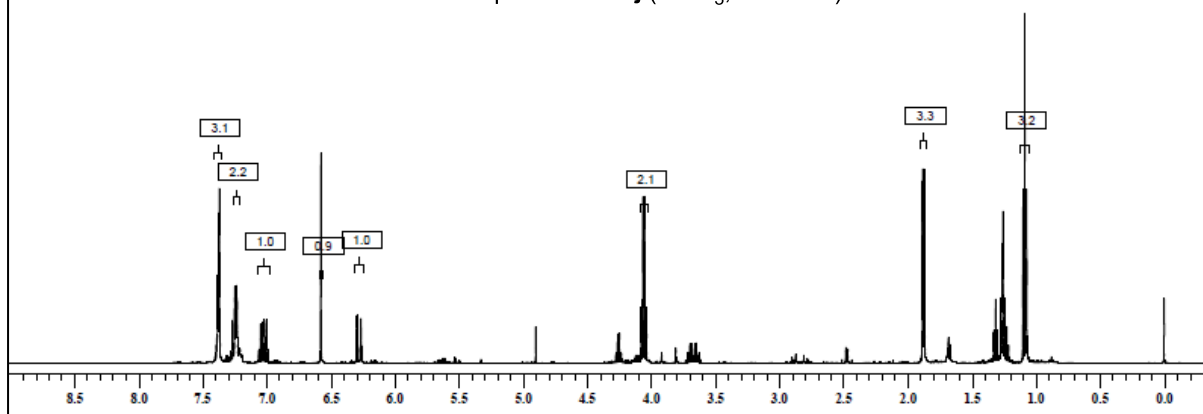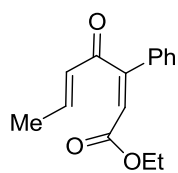

$^{13}\text{C}$  NMR spectrum of **1j** ( $\text{CDCl}_3$ , 125 MHz)

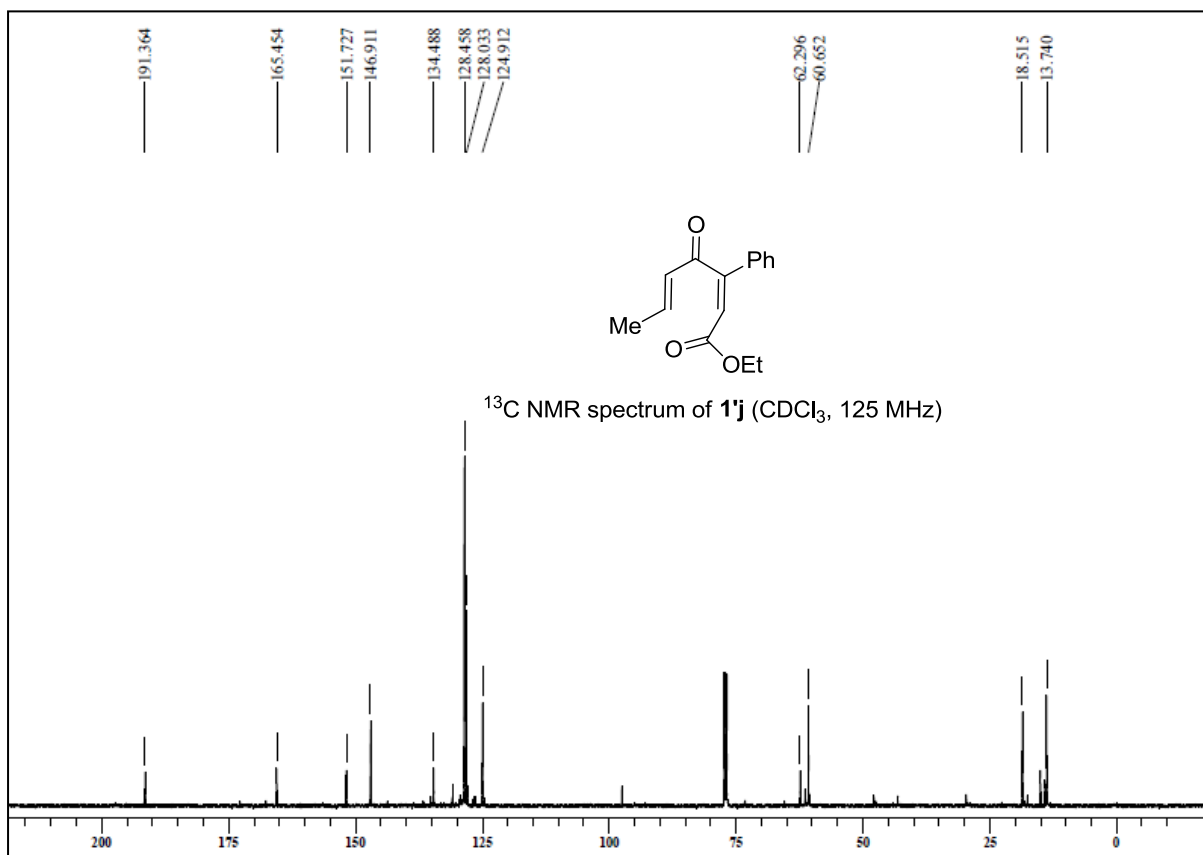

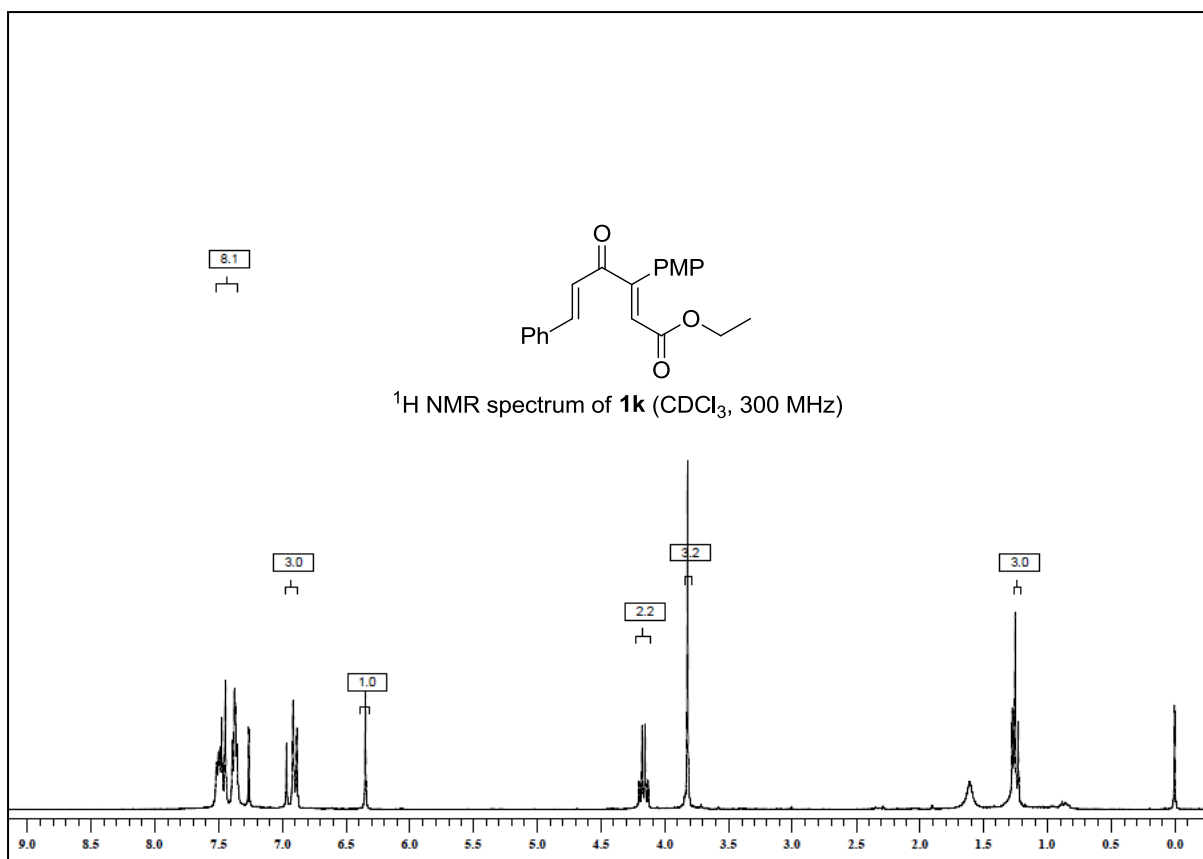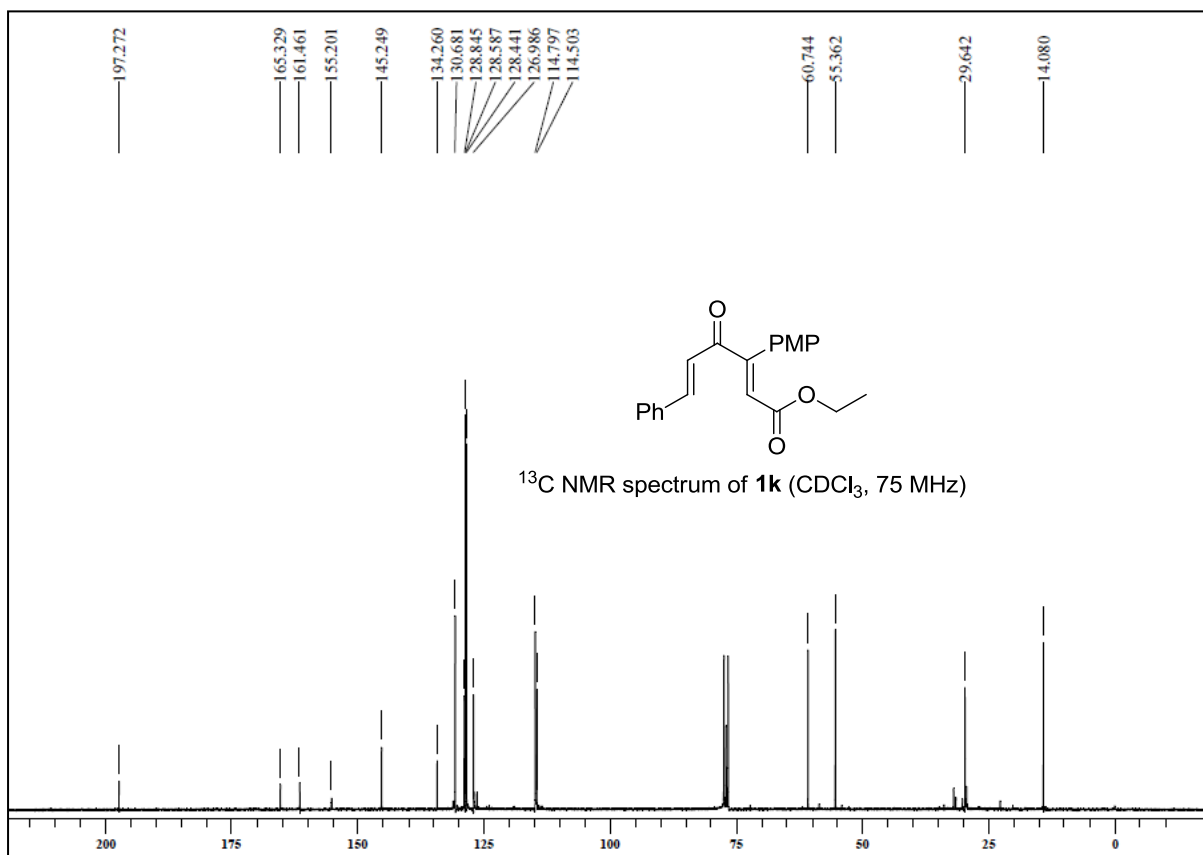

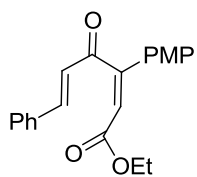

$^1\text{H}$  NMR spectrum of **1'k** ( $\text{CDCl}_3$ , 500 MHz)

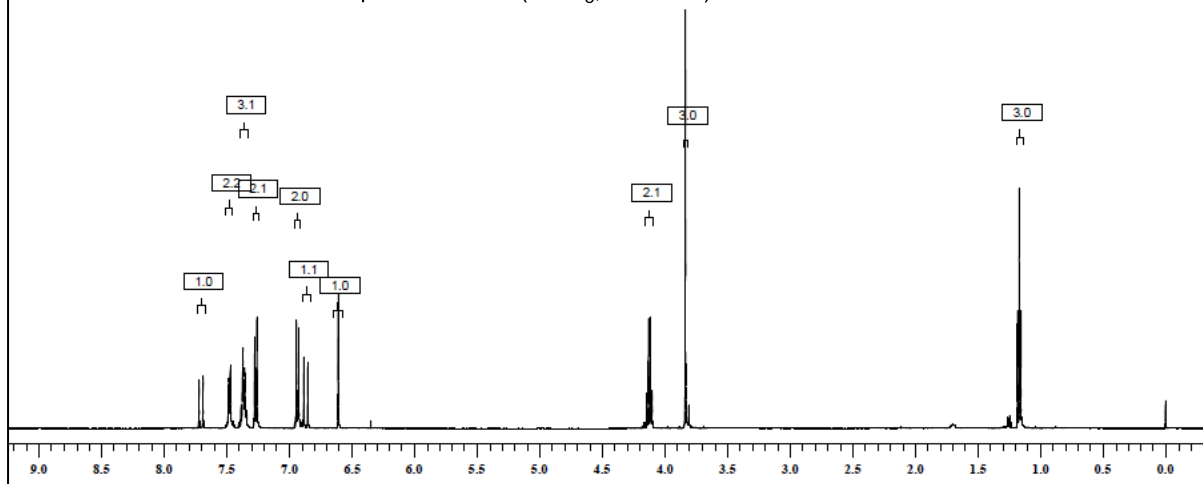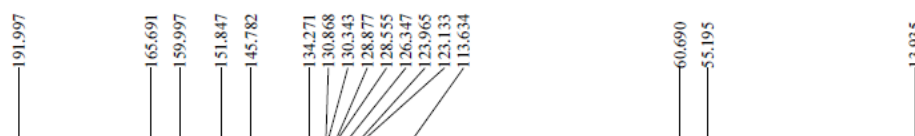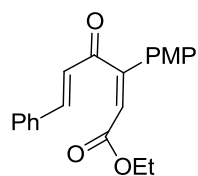

$^{13}\text{C}$  NMR spectrum of **1'k** ( $\text{CDCl}_3$ , 75 MHz)

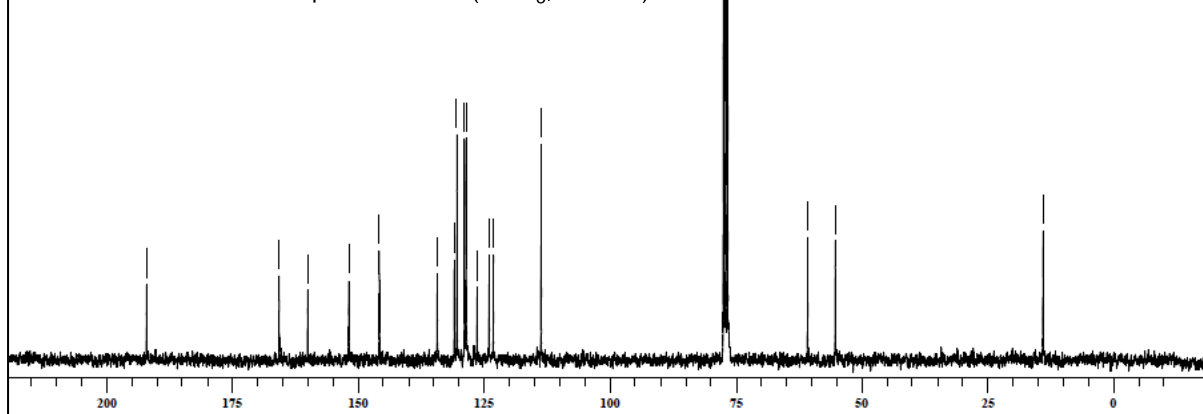

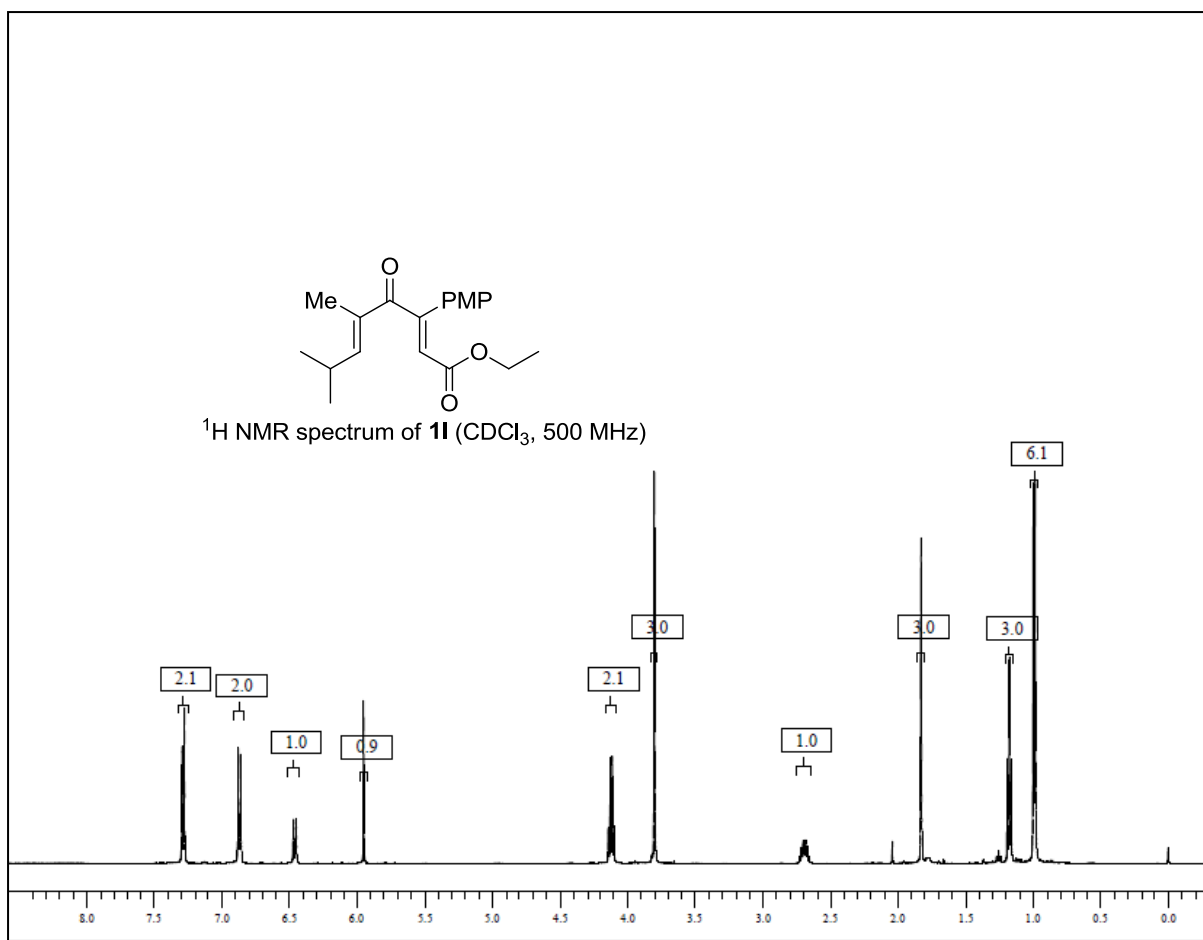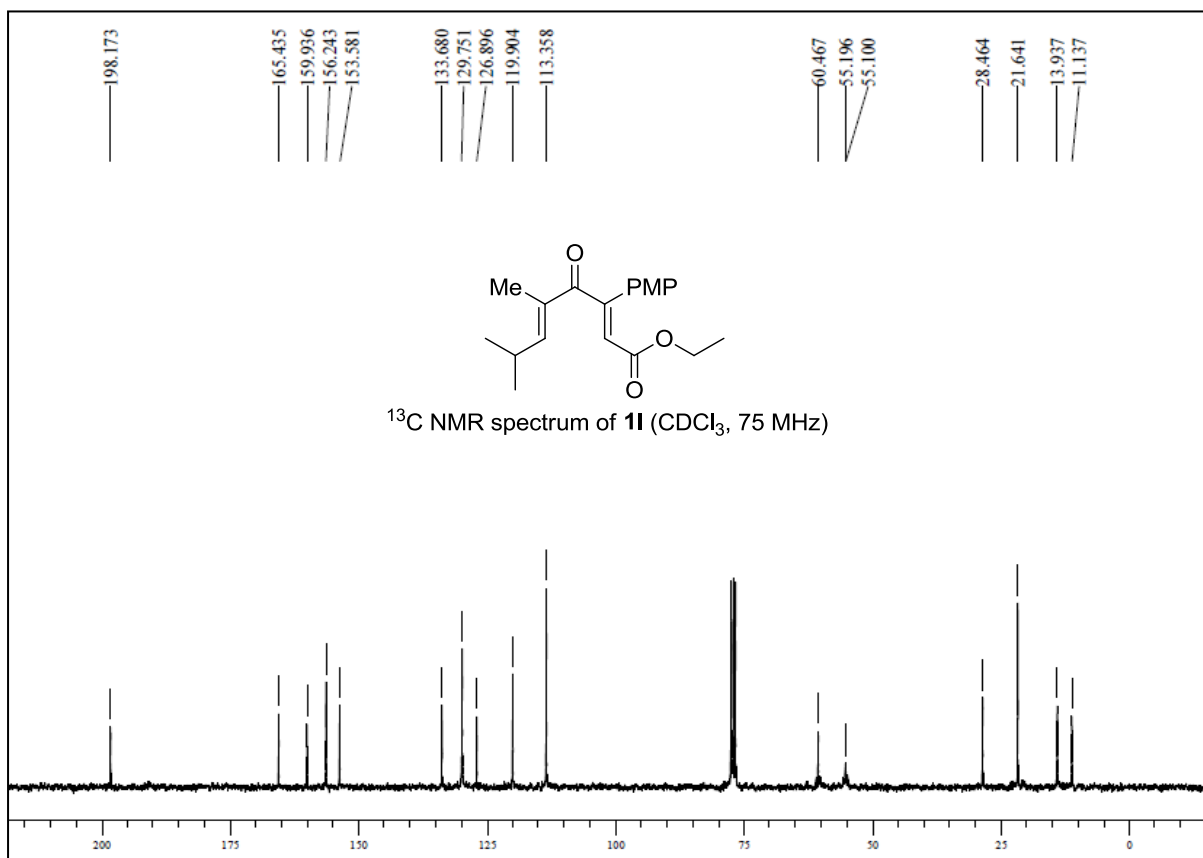

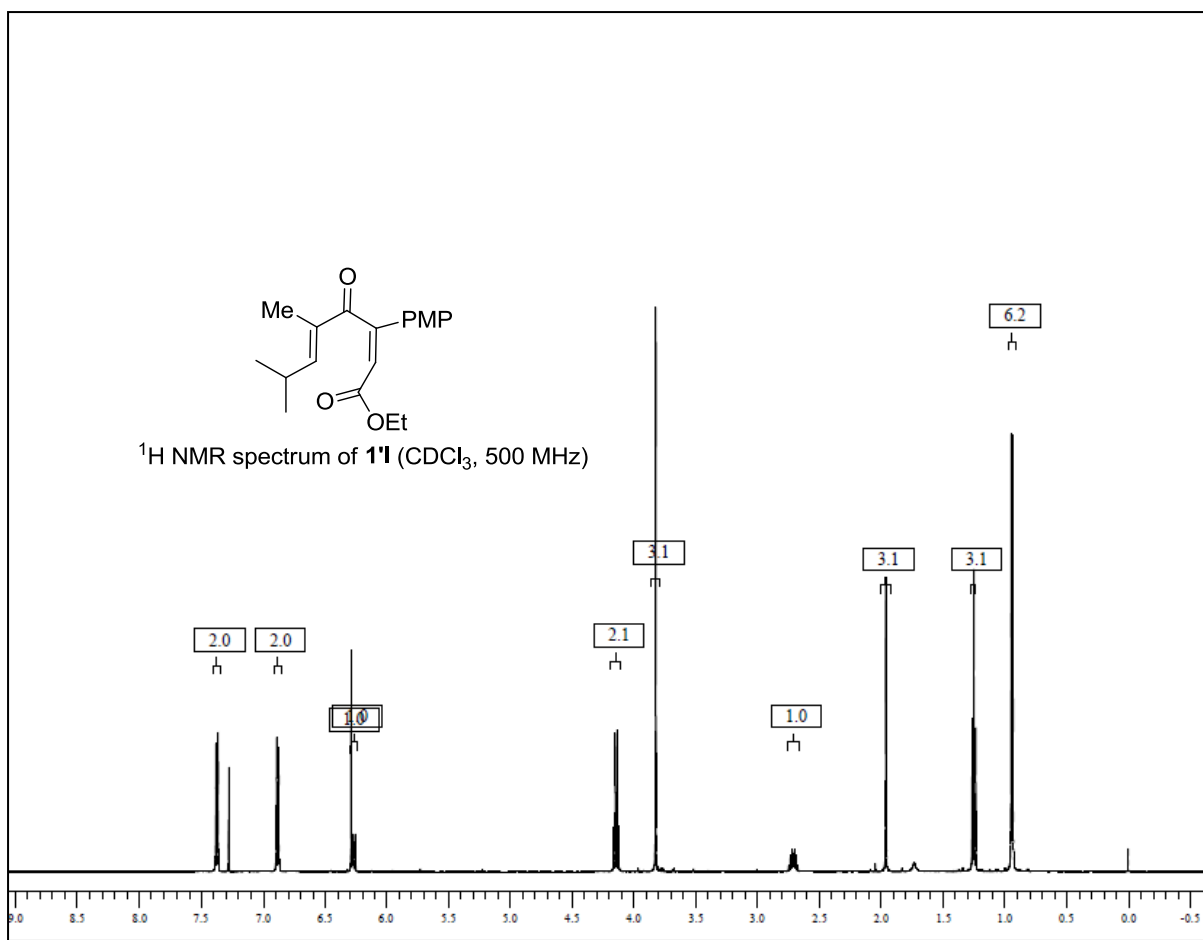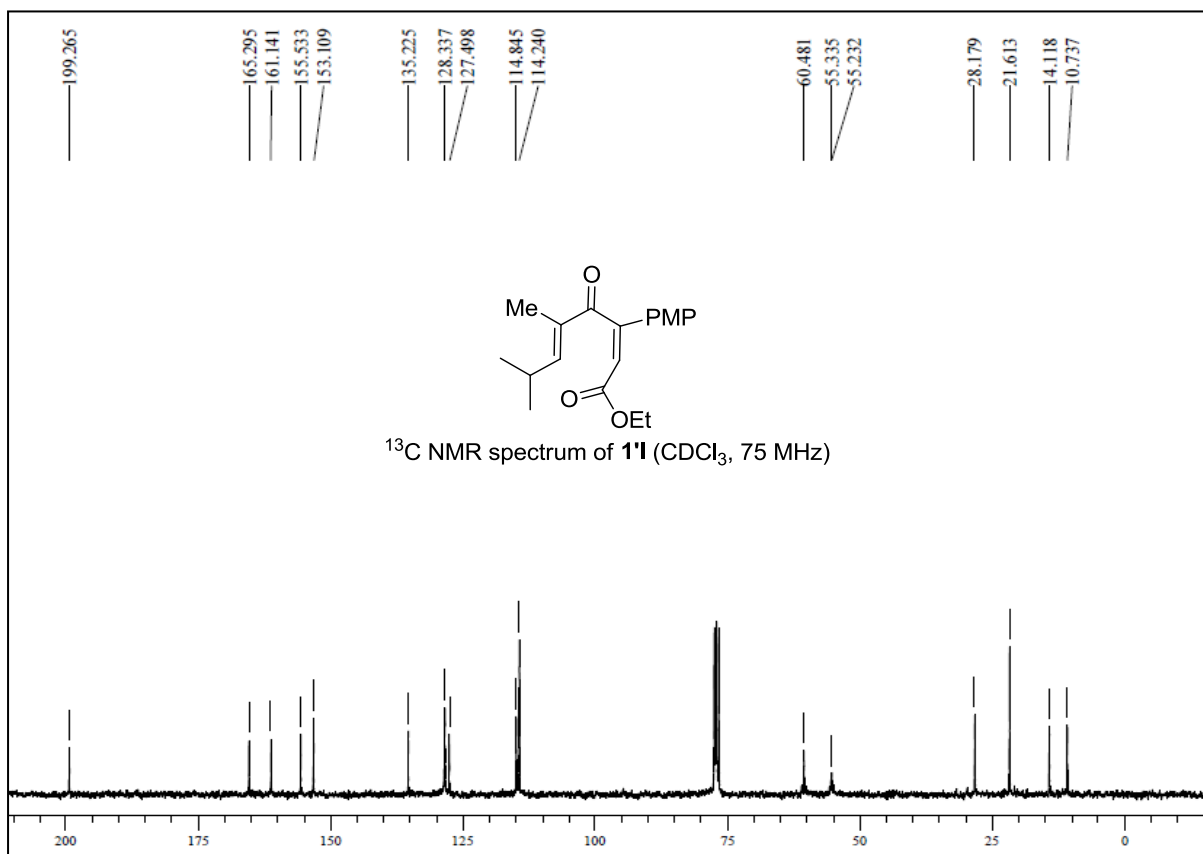



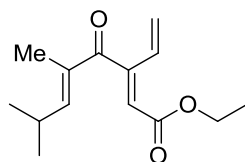

$^1\text{H}$  NMR spectrum of **1m** ( $\text{CDCl}_3$ , 300 MHz)

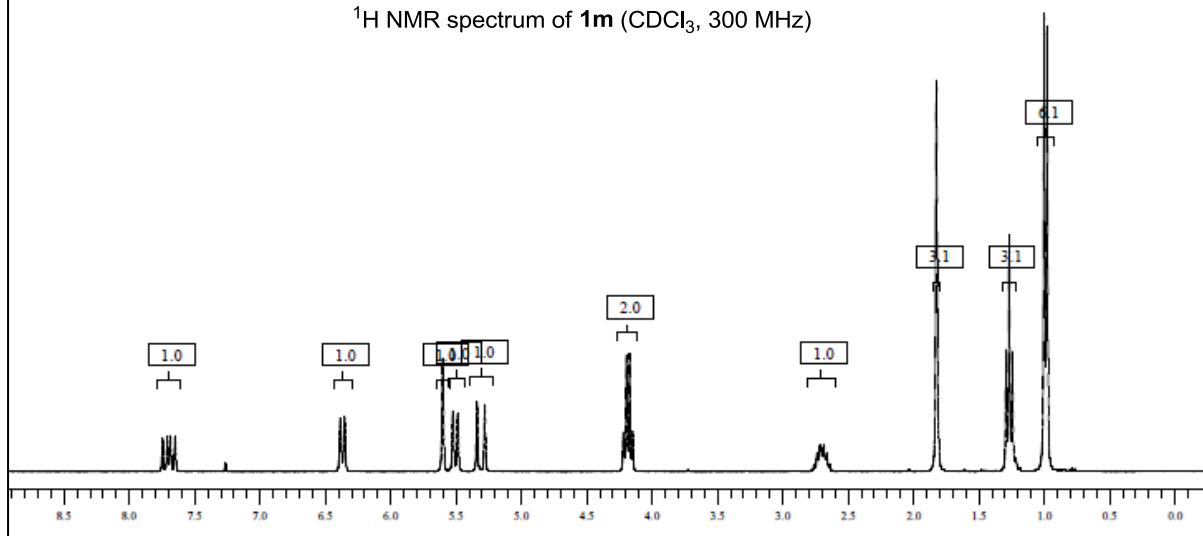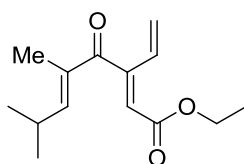

$^{13}\text{C}$  NMR spectrum of **1m** ( $\text{CDCl}_3$ , 75 MHz)

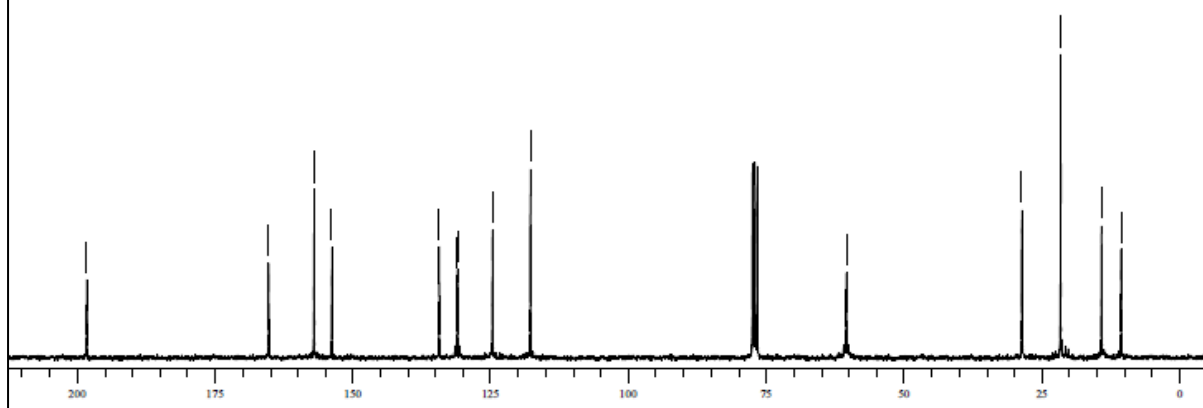

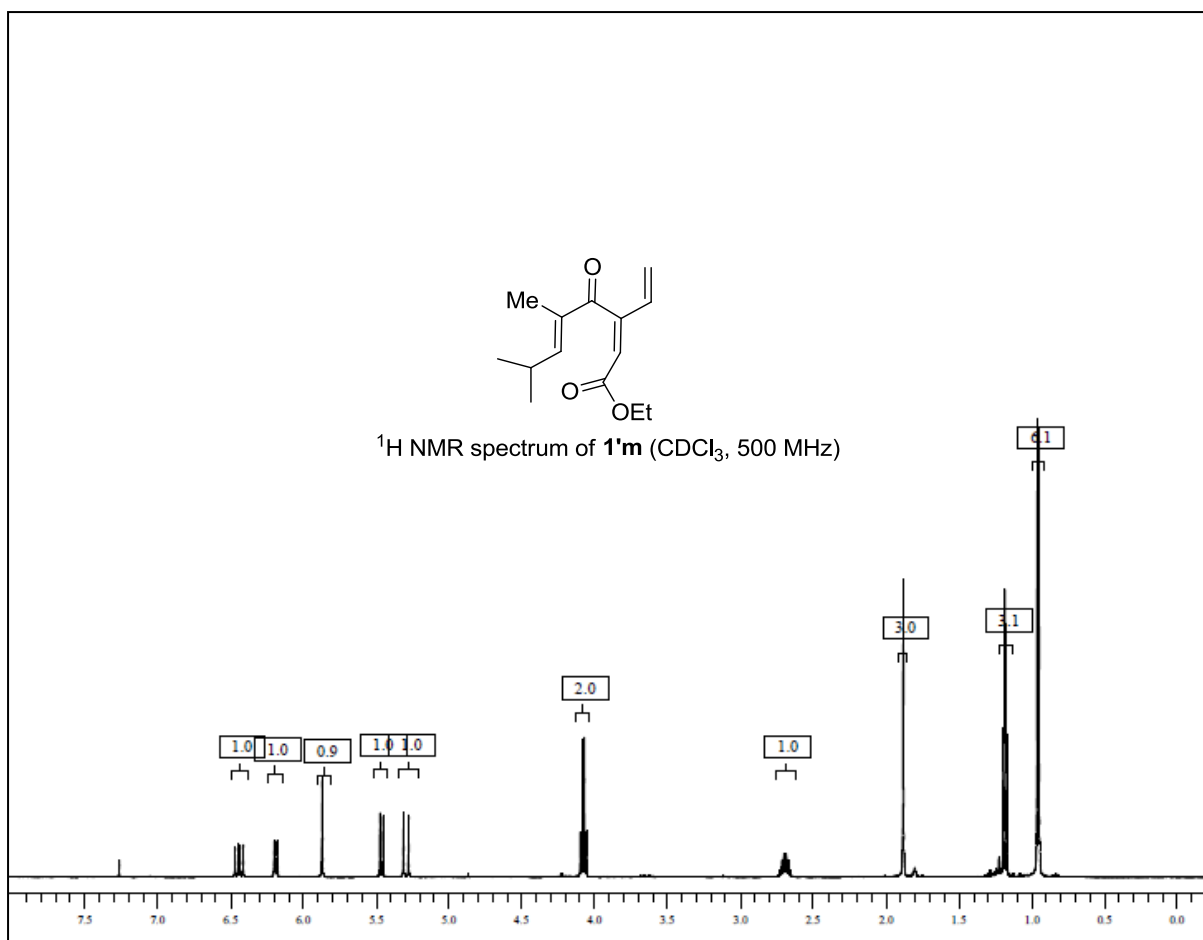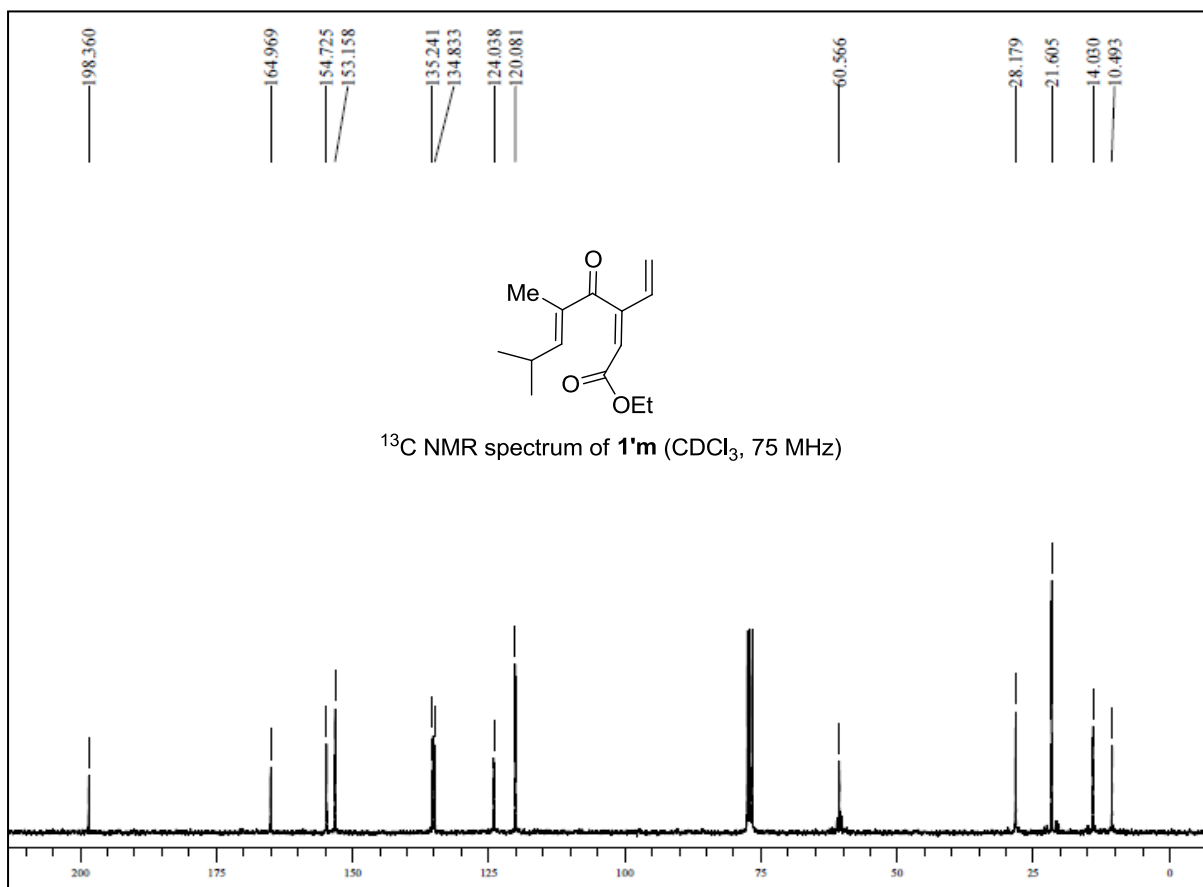

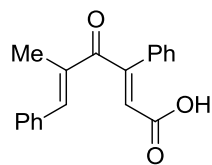

$^1\text{H}$  NMR spectrum of **6** ( $\text{CDCl}_3$ , 500 MHz)

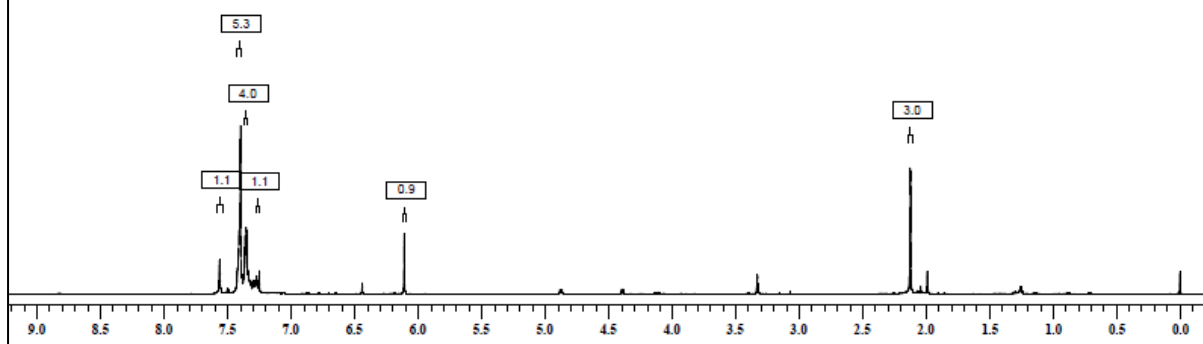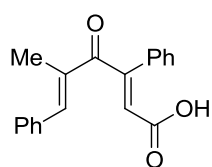

$^{13}\text{C}$  NMR spectrum of **6** ( $\text{CDCl}_3$ , 125 MHz)

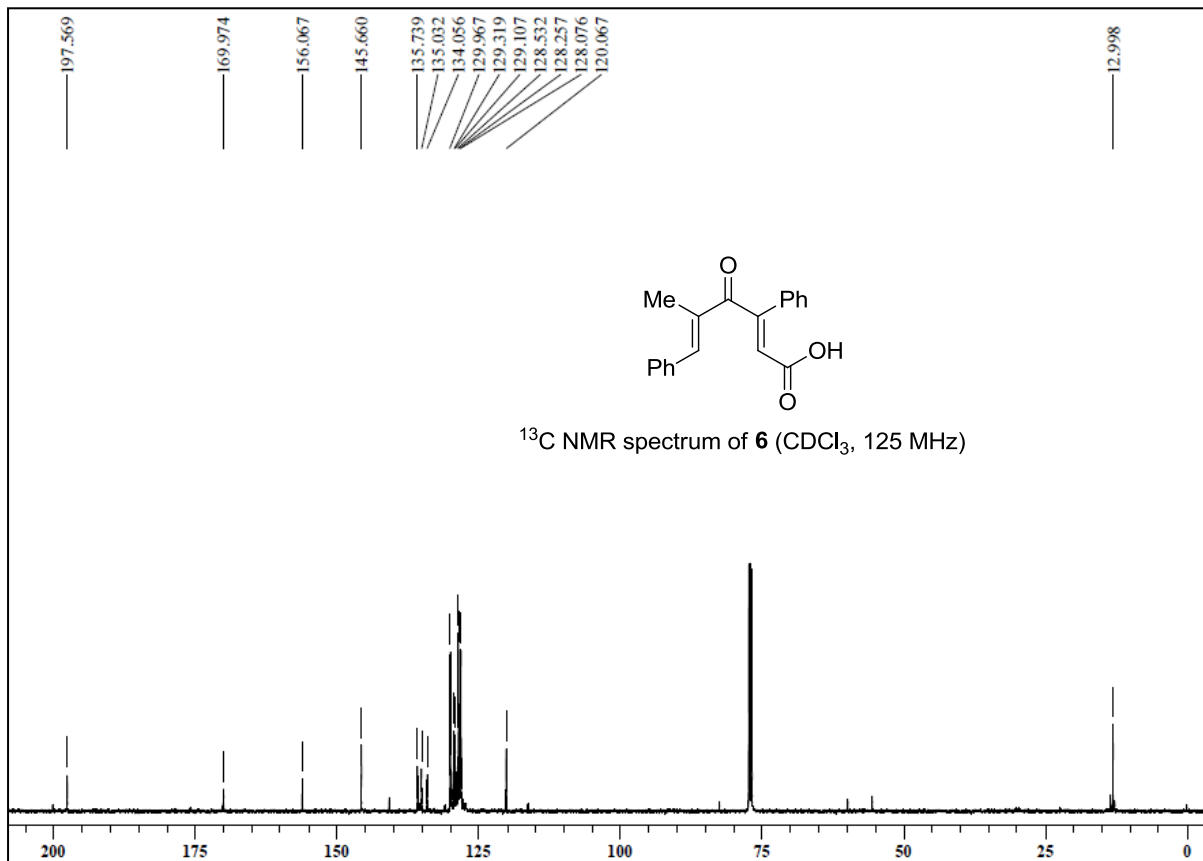

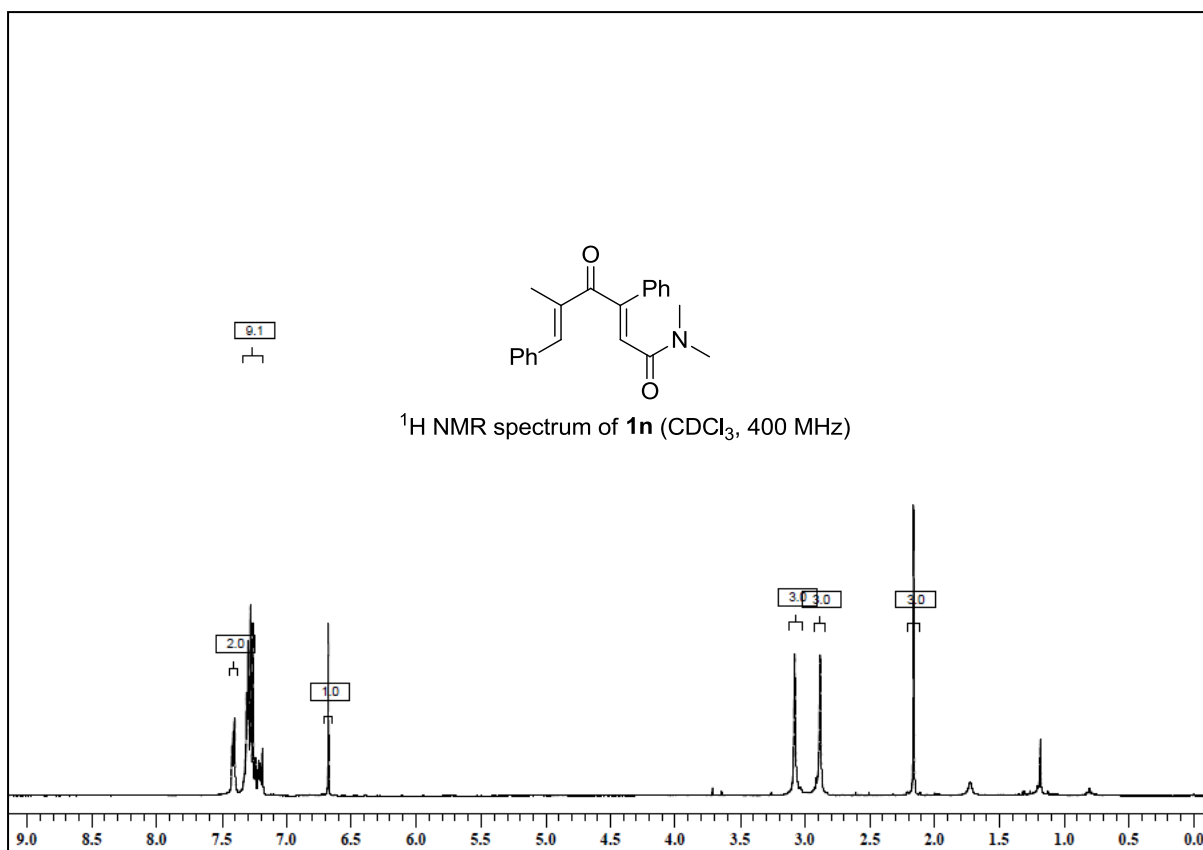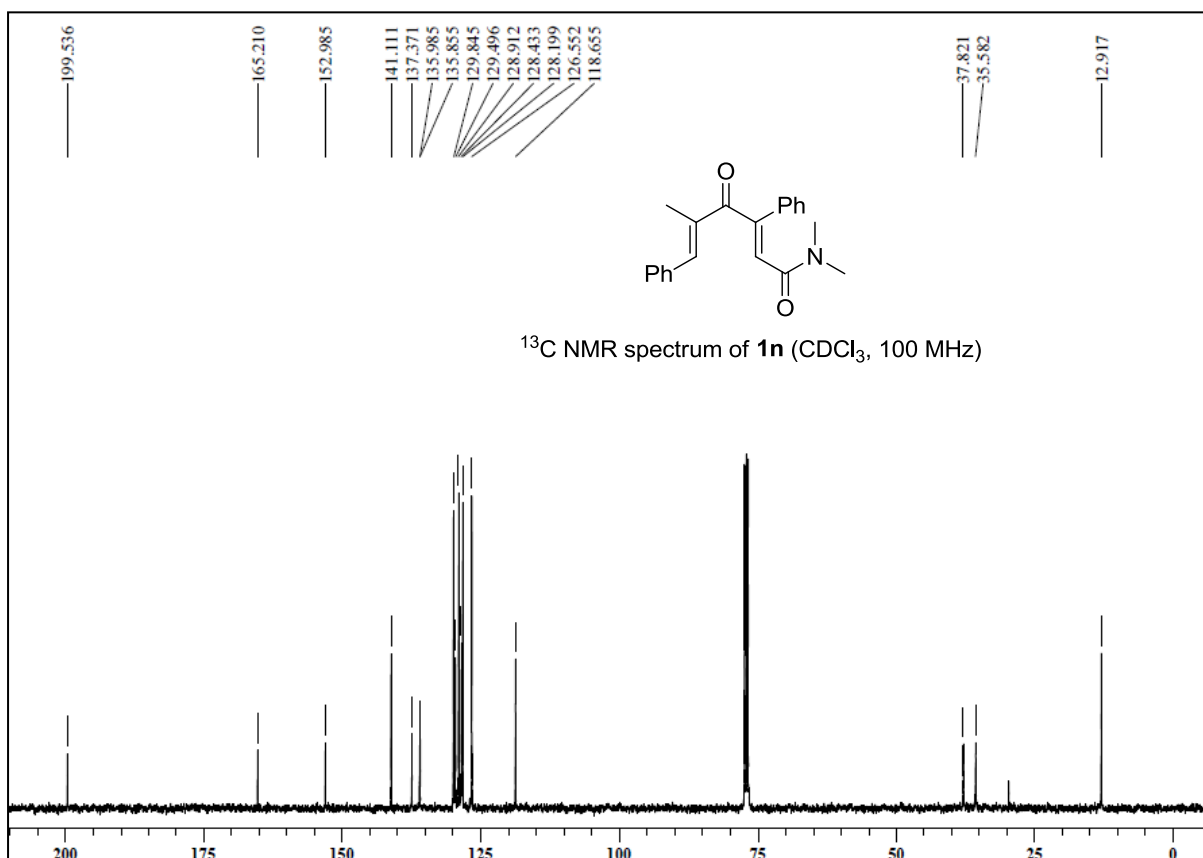

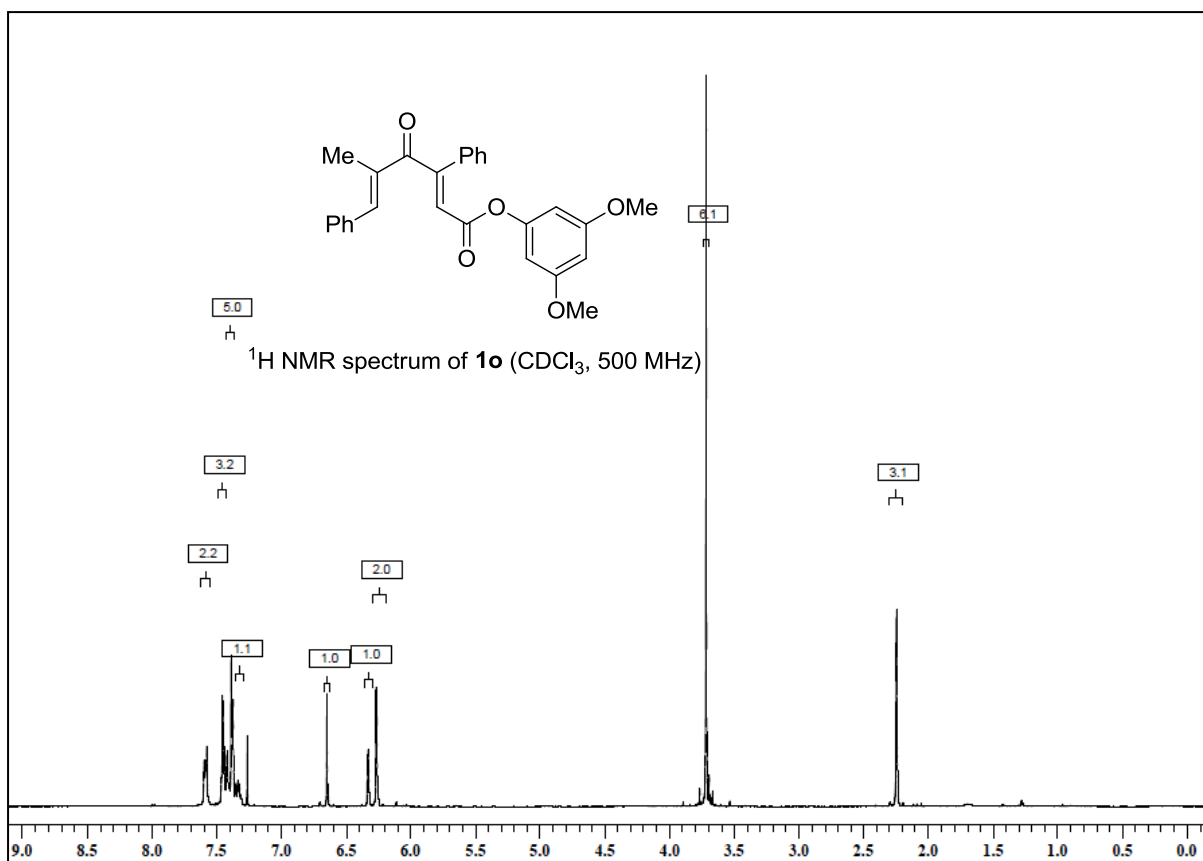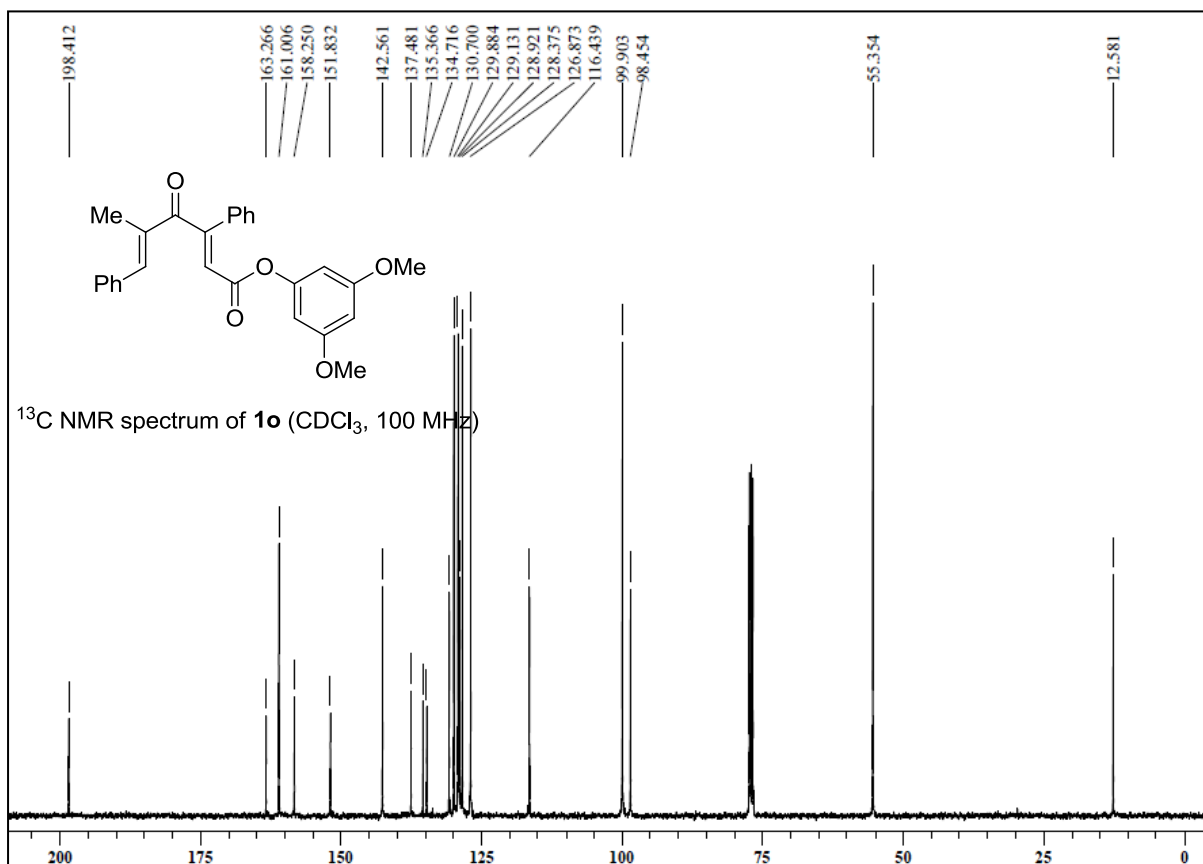

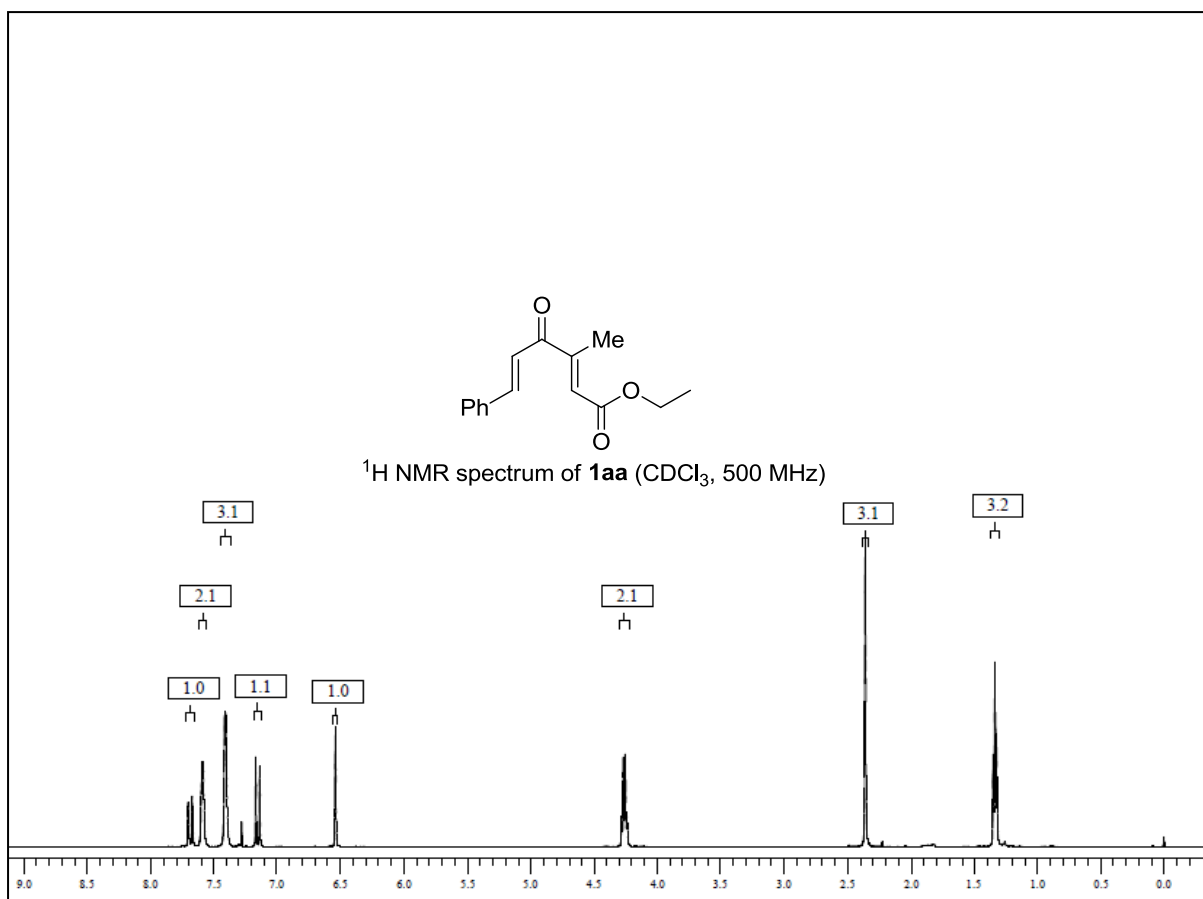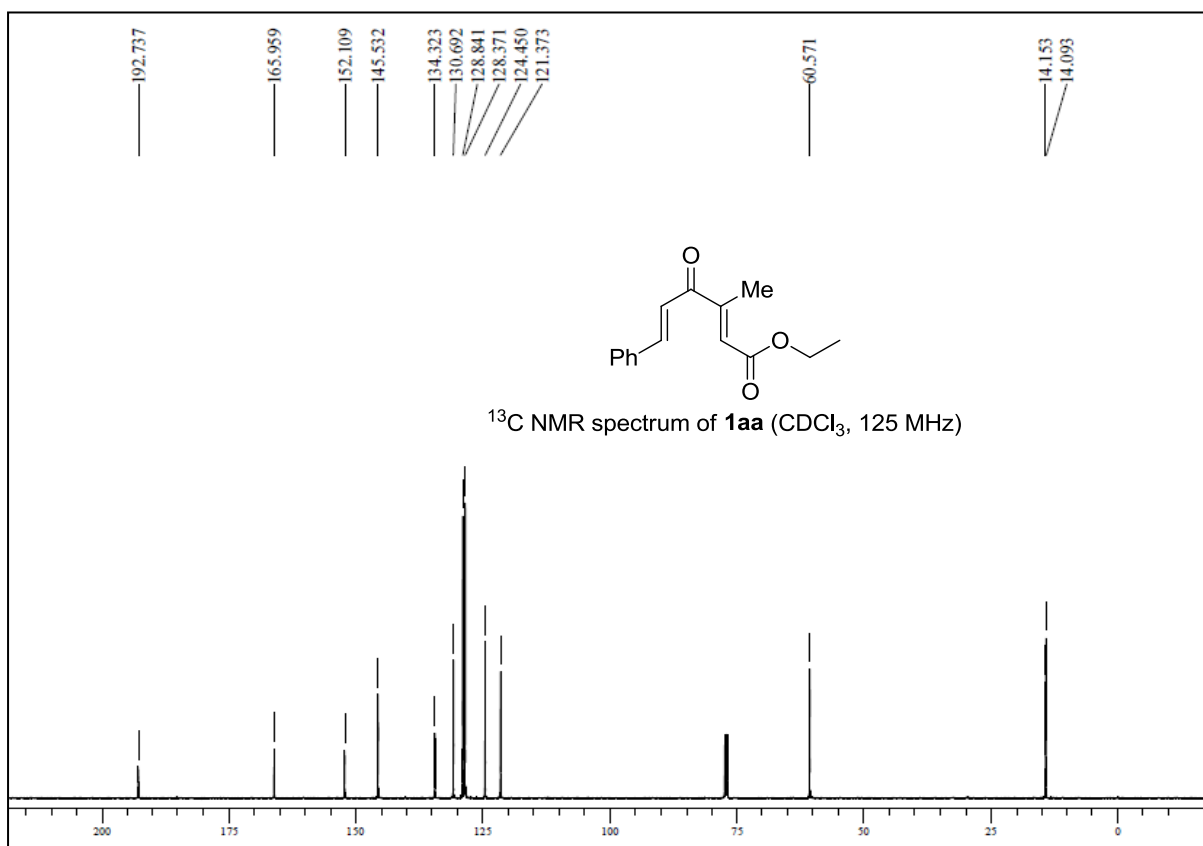

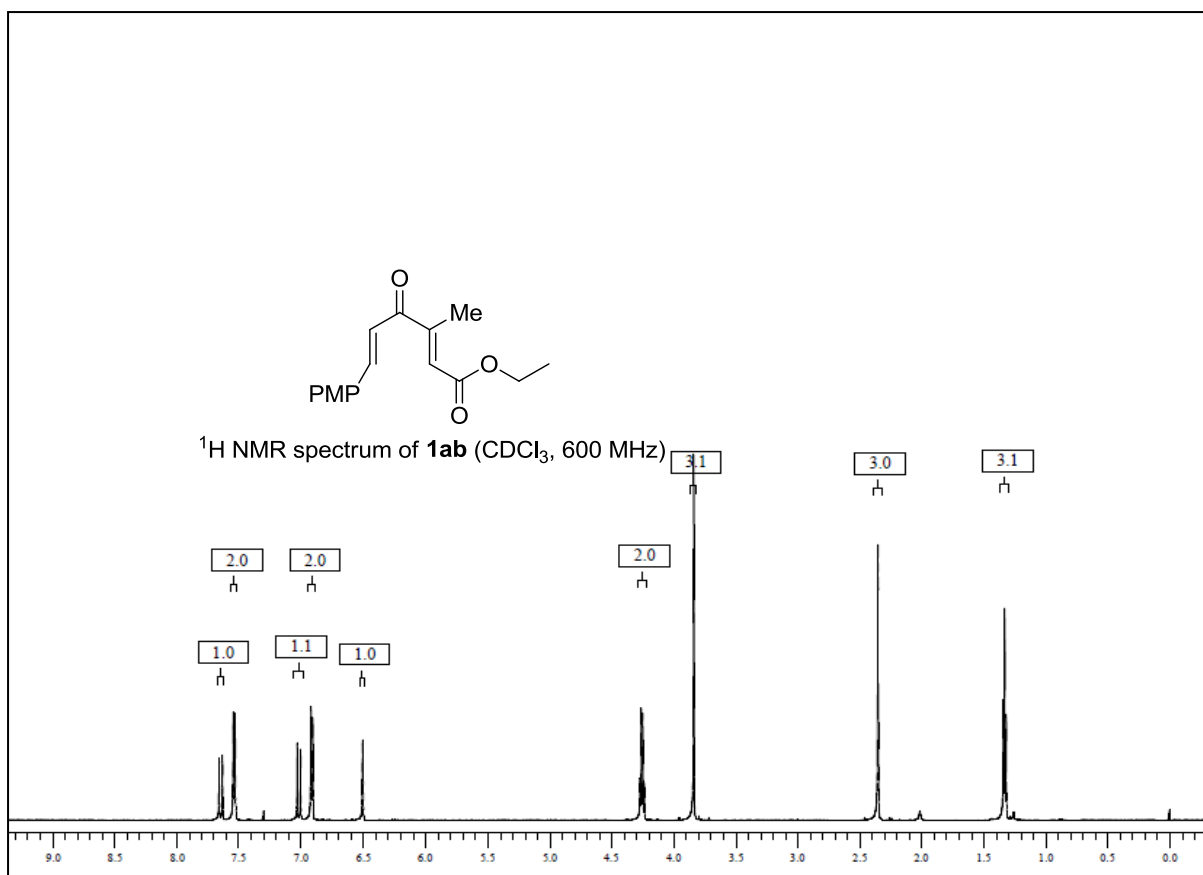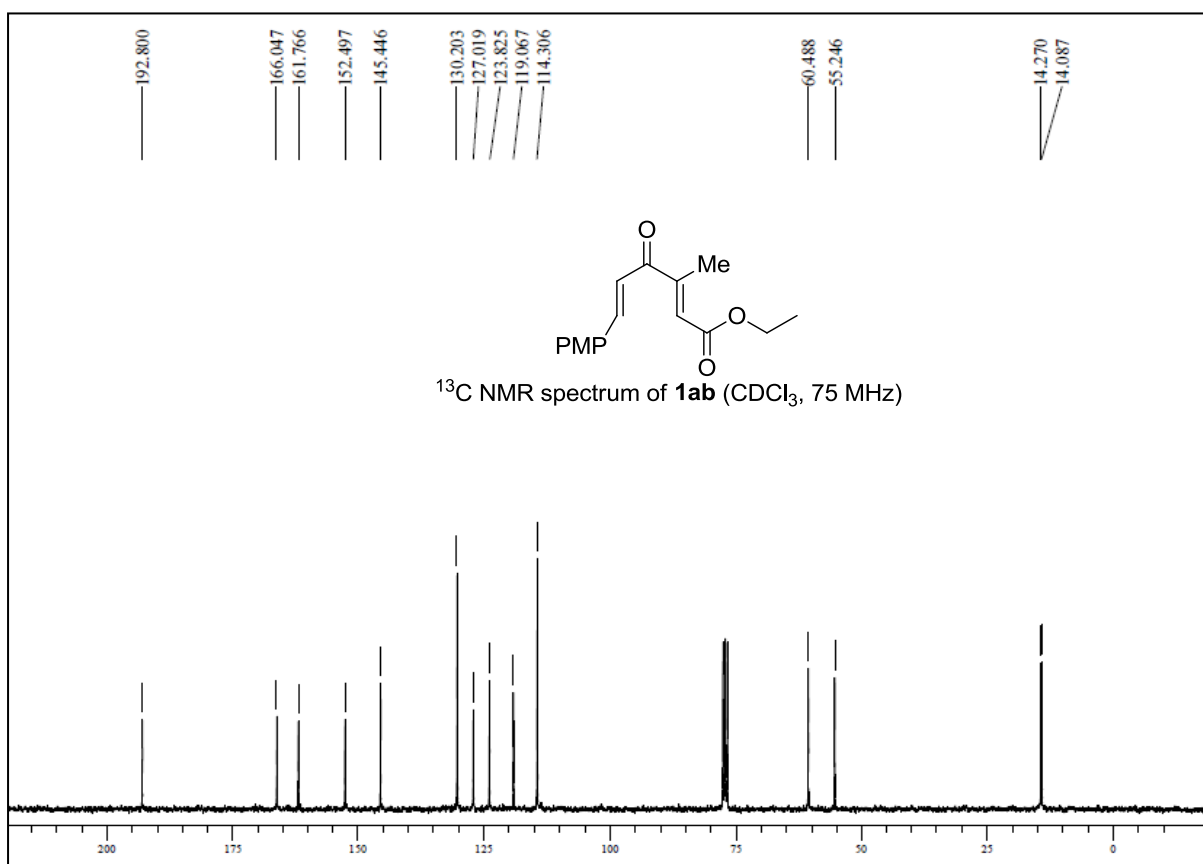

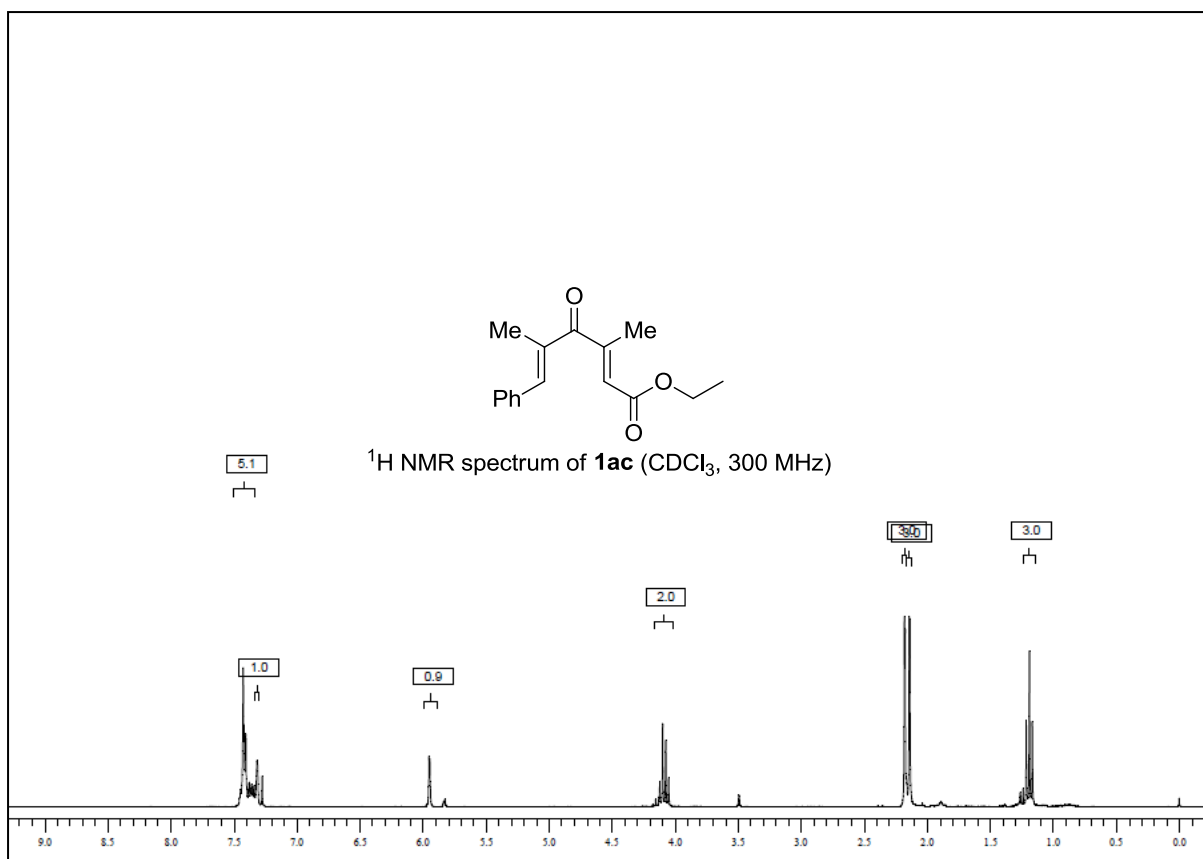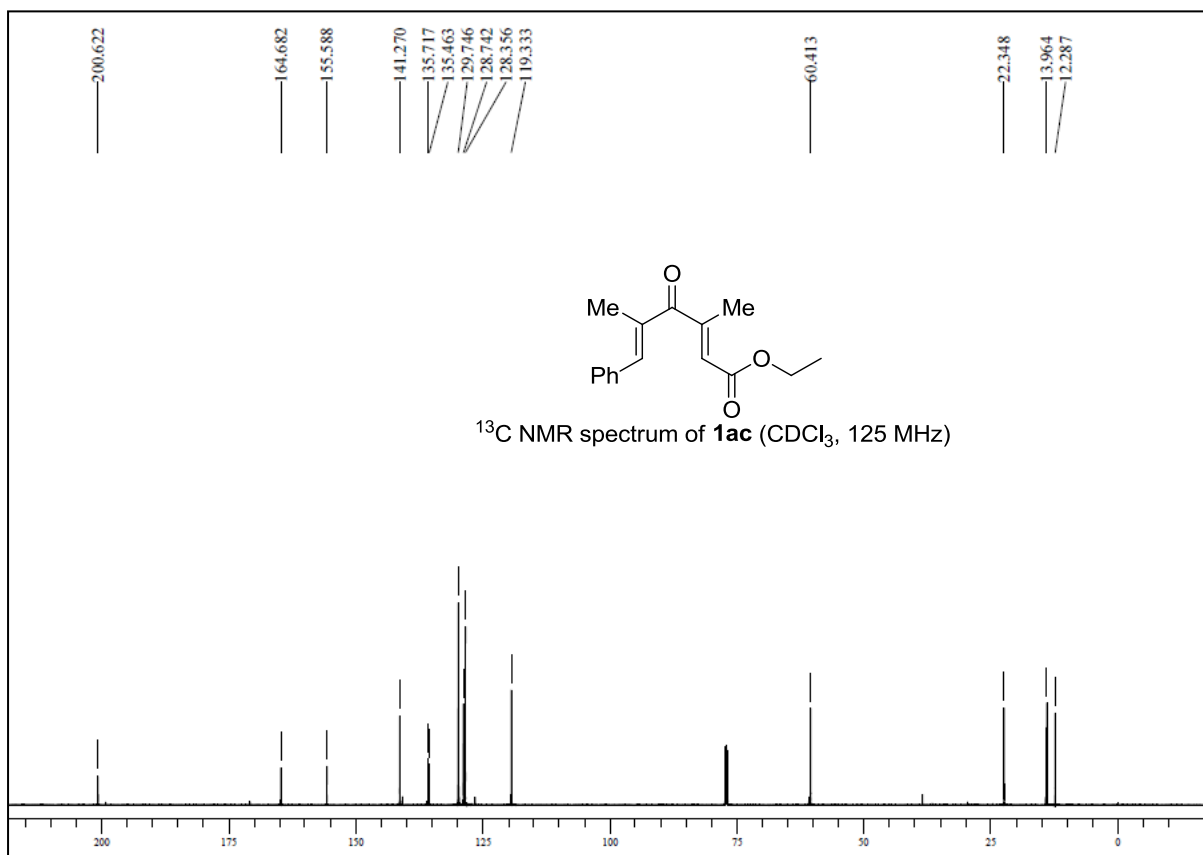



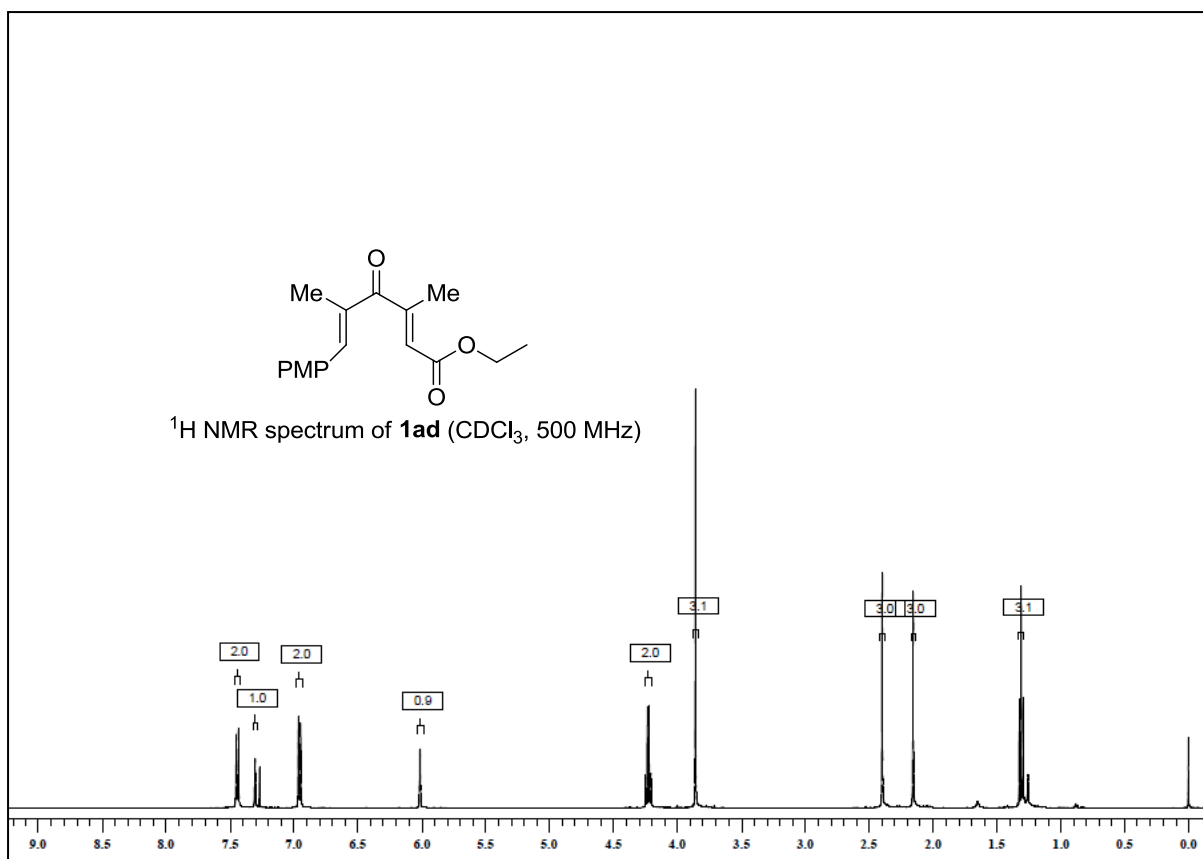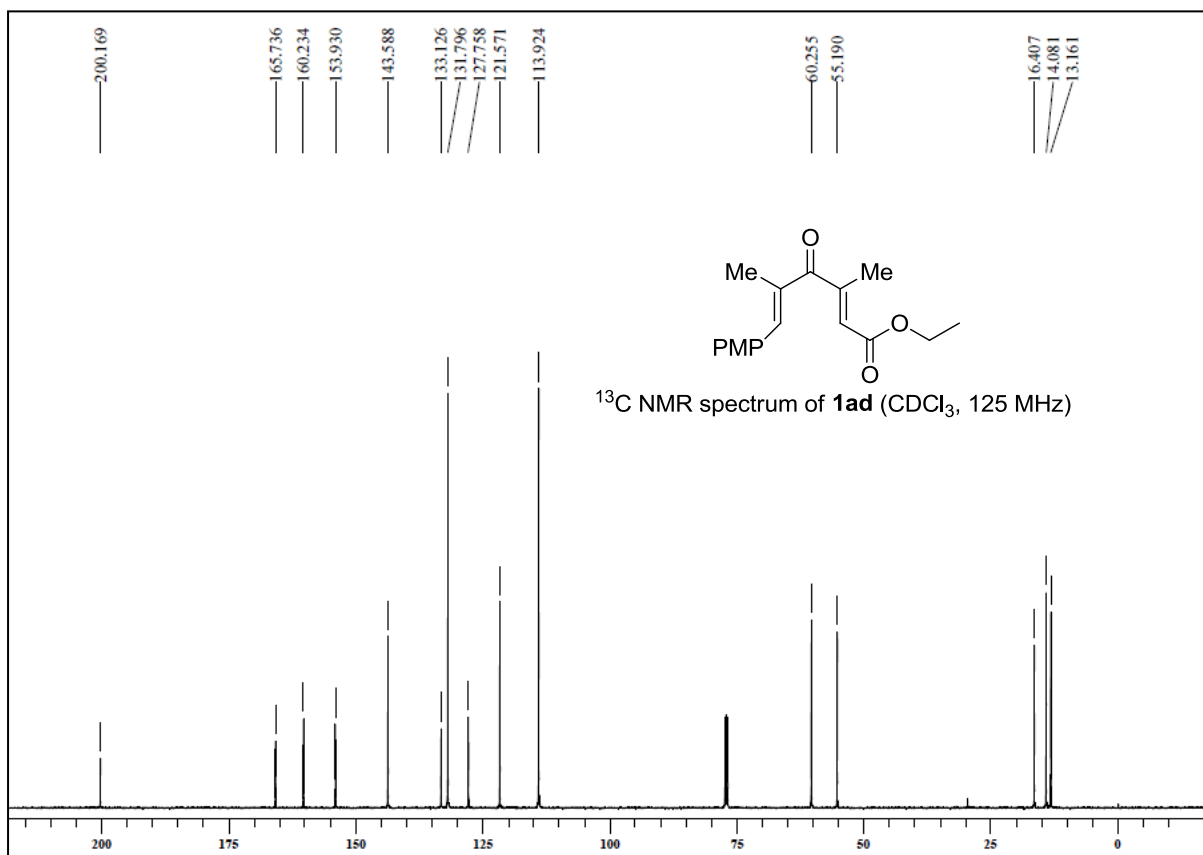

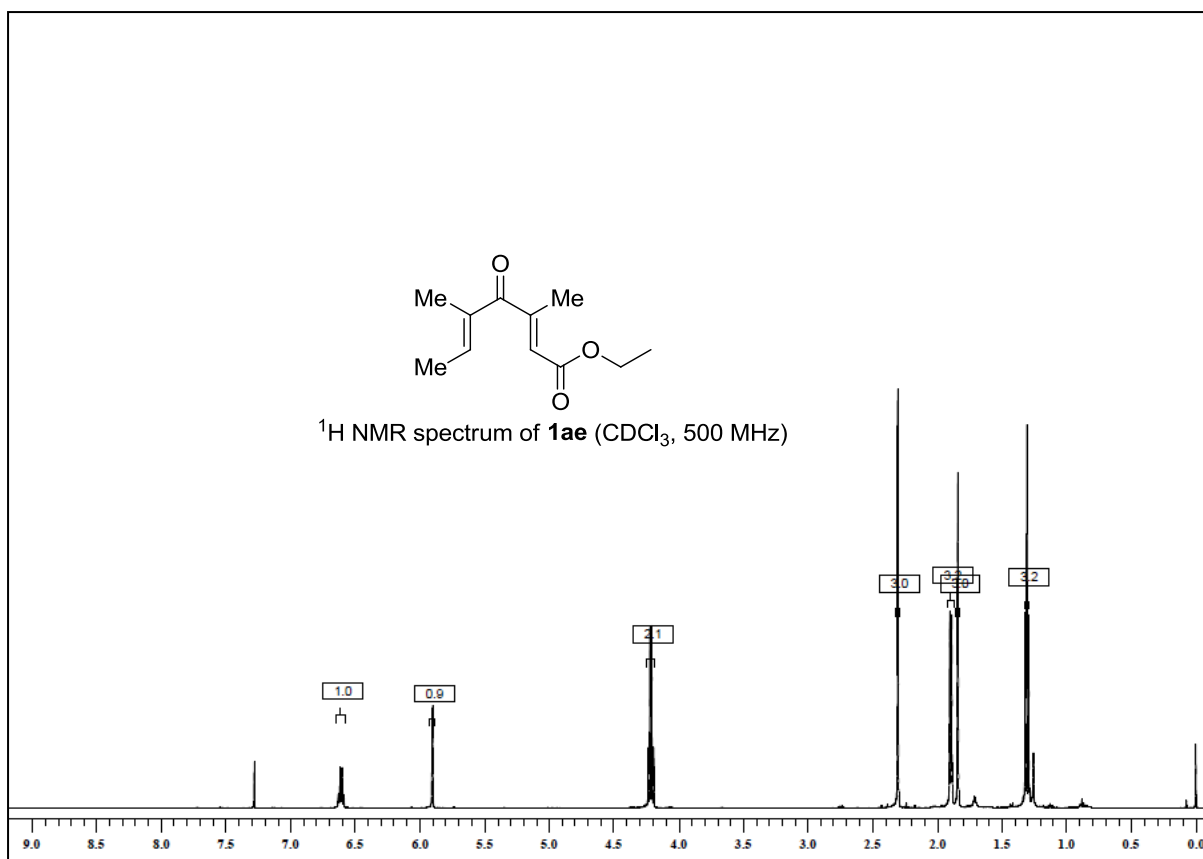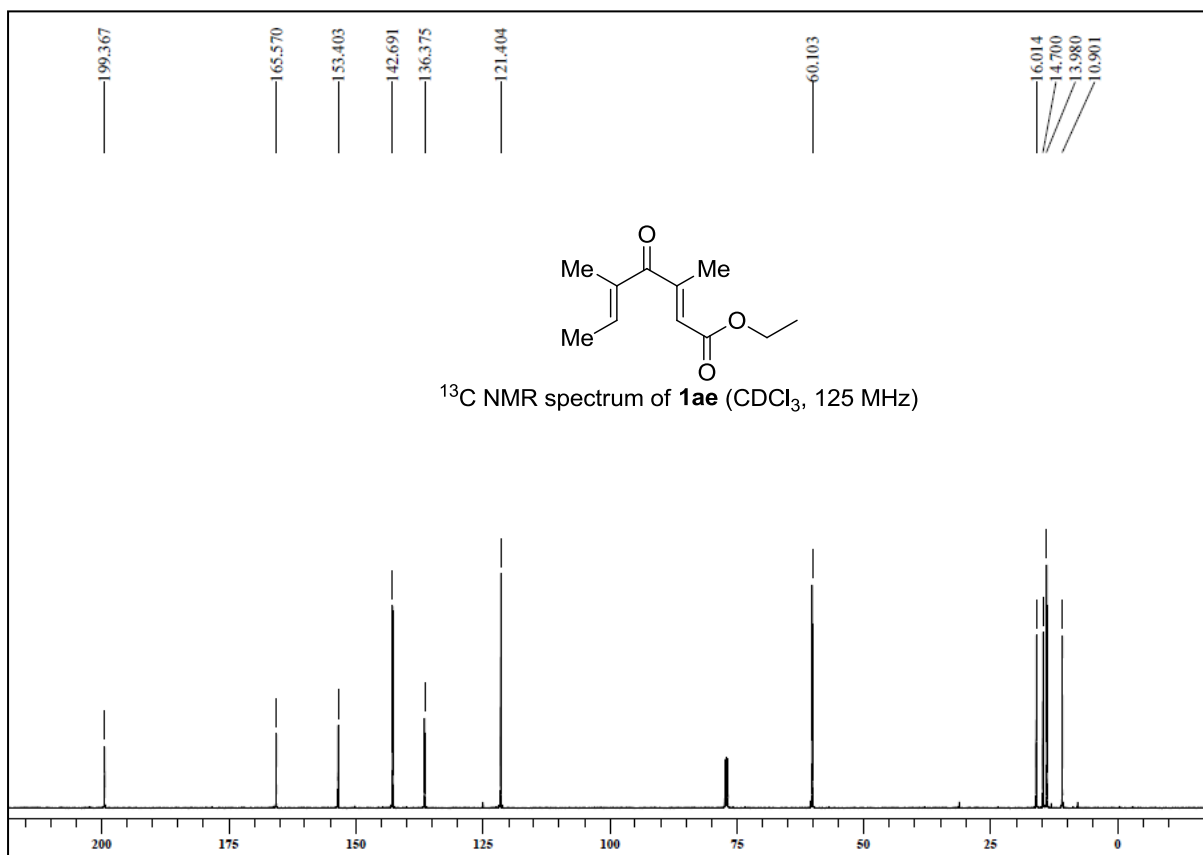

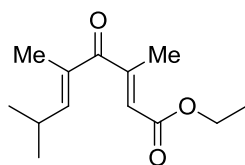

$^1\text{H}$  NMR spectrum of **1af** ( $\text{CDCl}_3$ , 500 MHz)

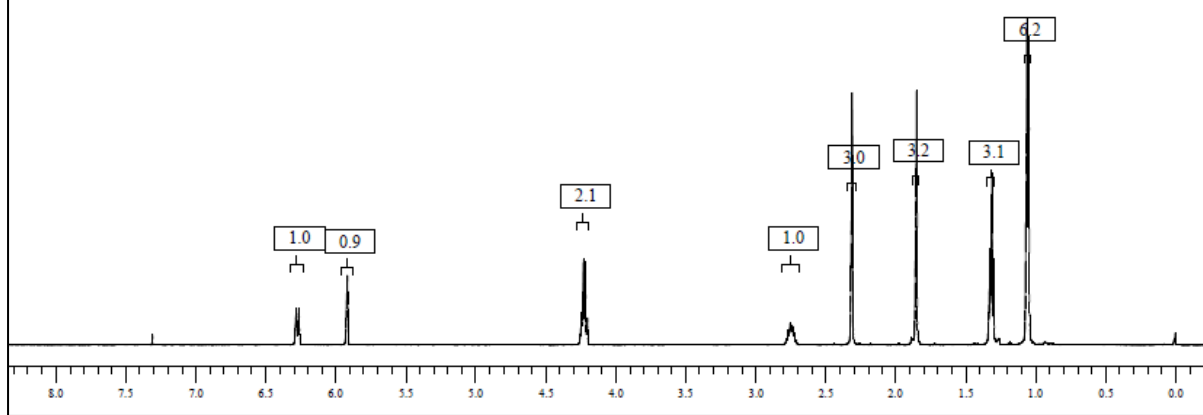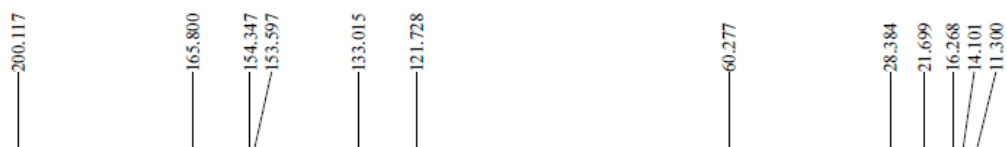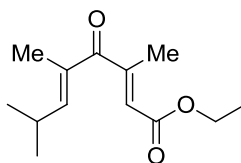

$^{13}\text{C}$  NMR spectrum of **1af** ( $\text{CDCl}_3$ , 125 MHz)

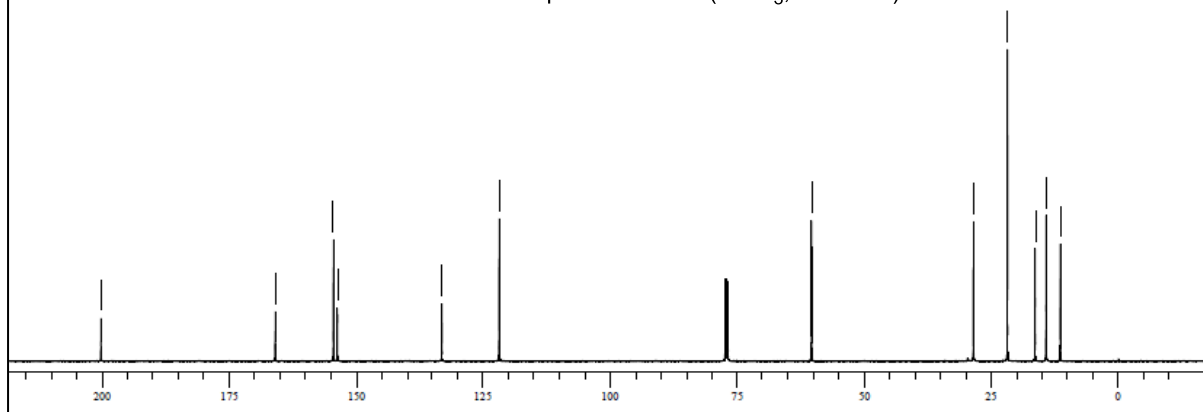

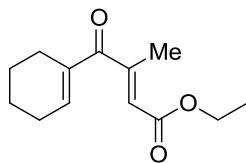

$^1\text{H}$  NMR spectrum of **1ag** ( $\text{CDCl}_3$ , 300 MHz)

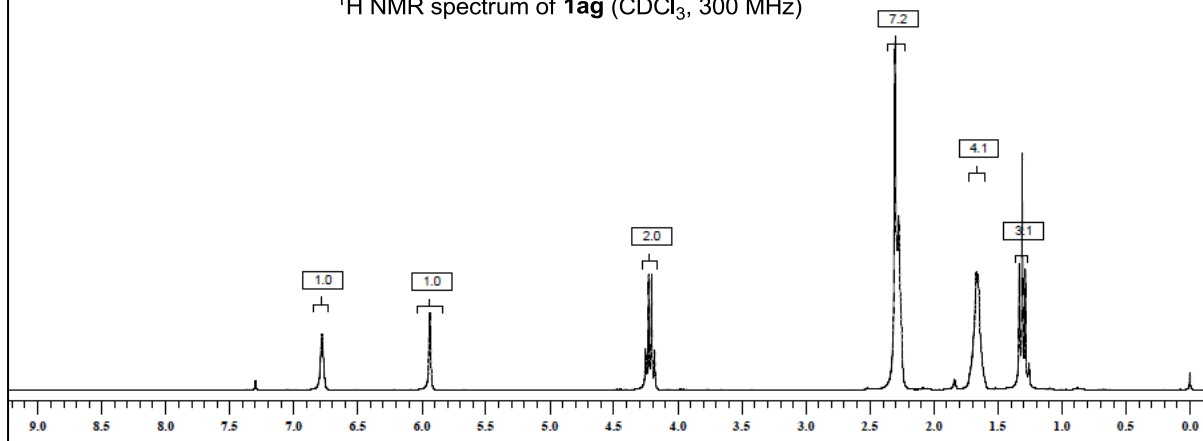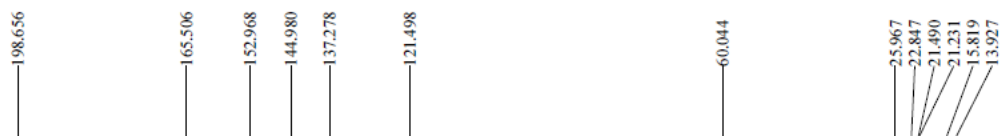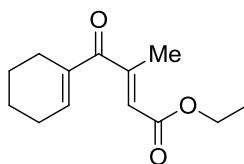

$^{13}\text{C}$  NMR spectrum of **1ag** ( $\text{CDCl}_3$ , 125 MHz)

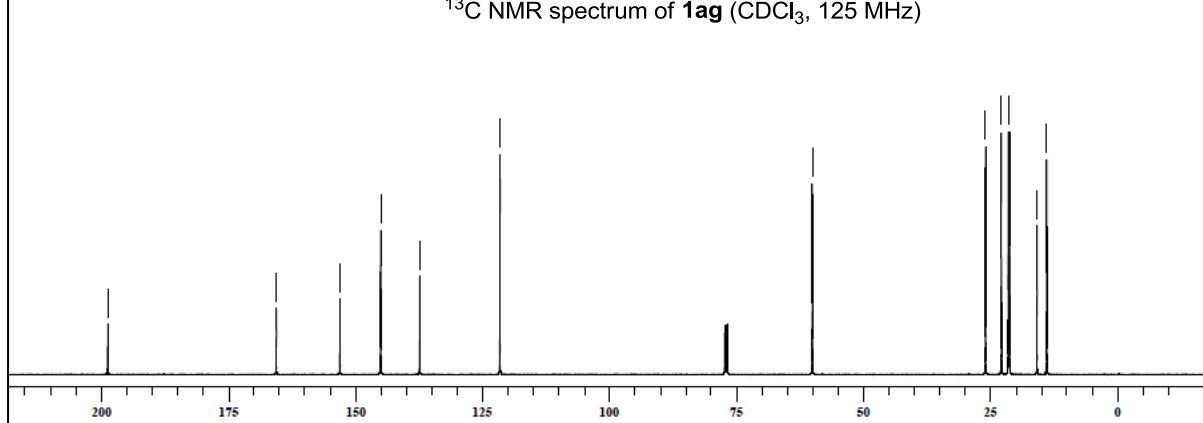

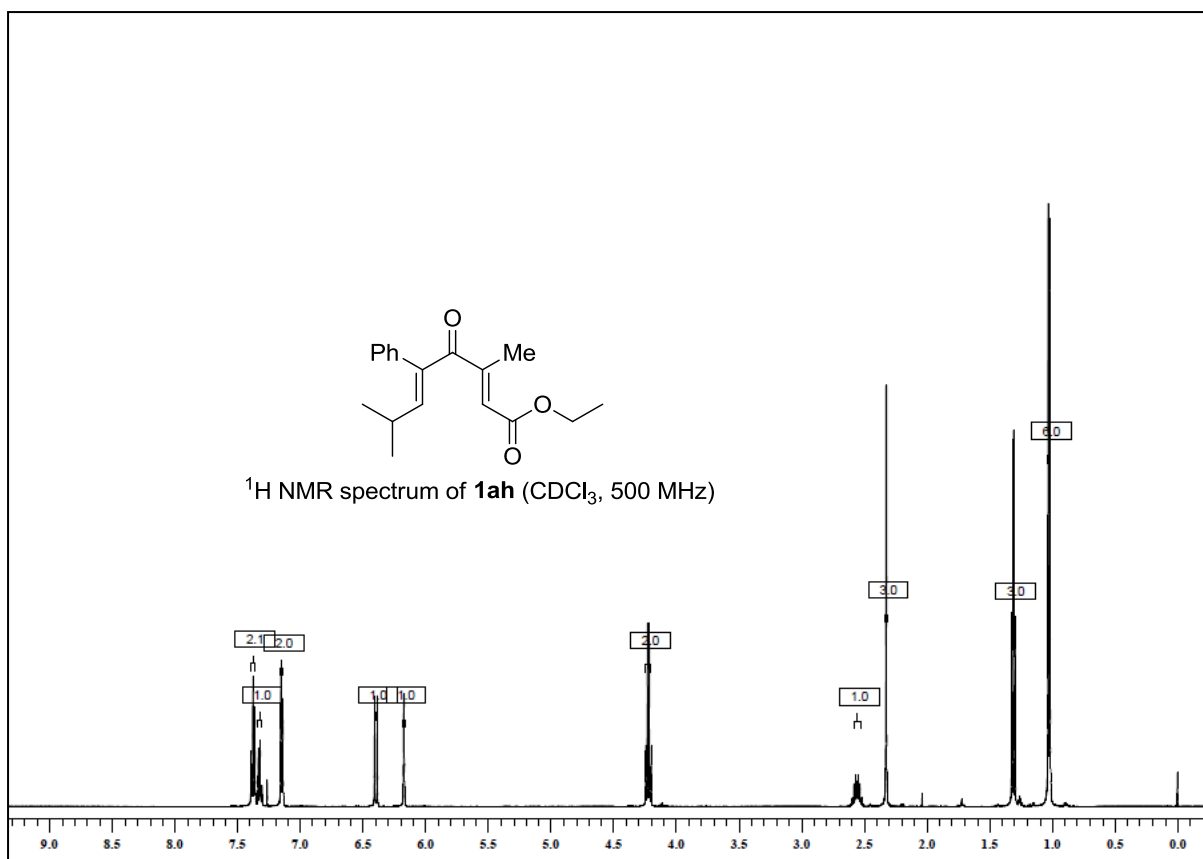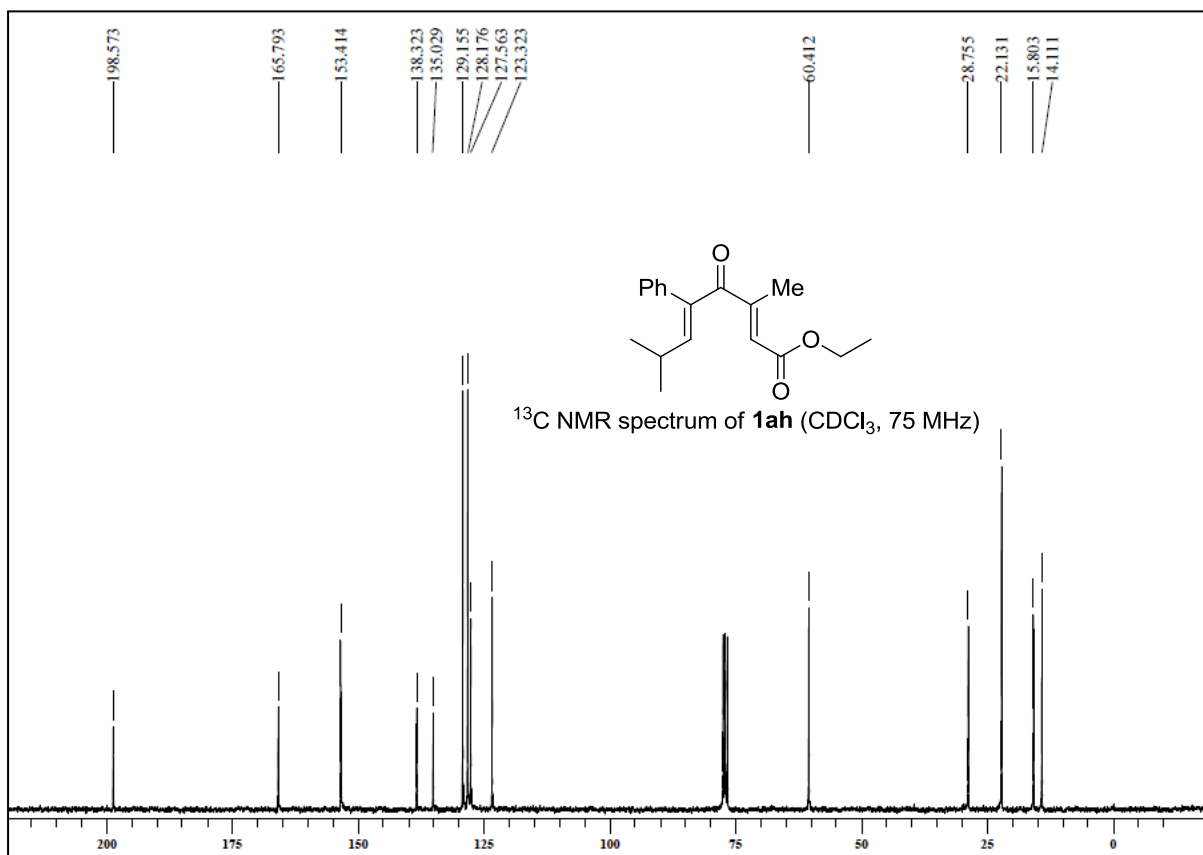

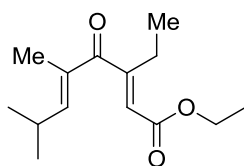

$^1\text{H}$  NMR spectrum of **1ai** ( $\text{CDCl}_3$ , 300 MHz)

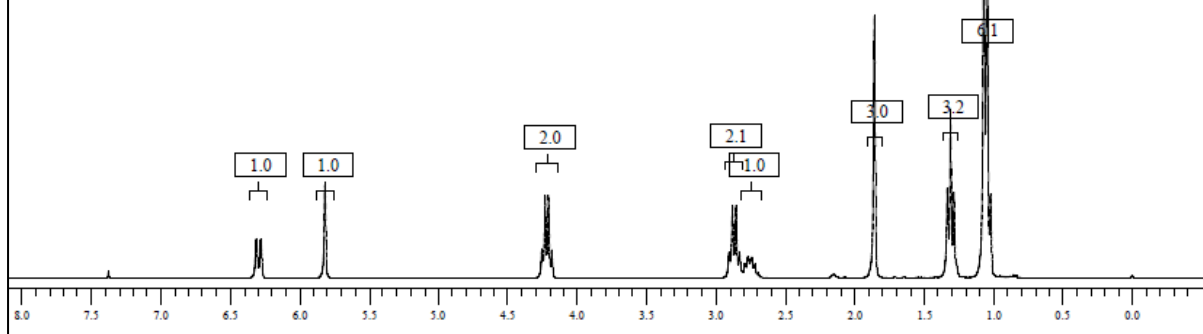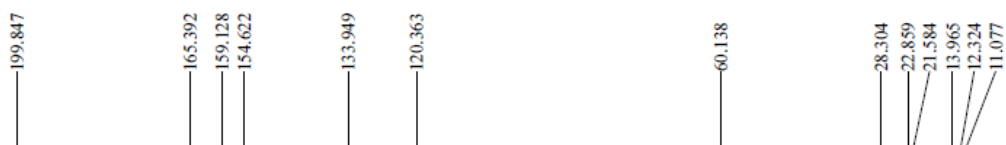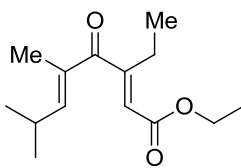

$^{13}\text{C}$  NMR spectrum of **1ai** ( $\text{CDCl}_3$ , 75 MHz)

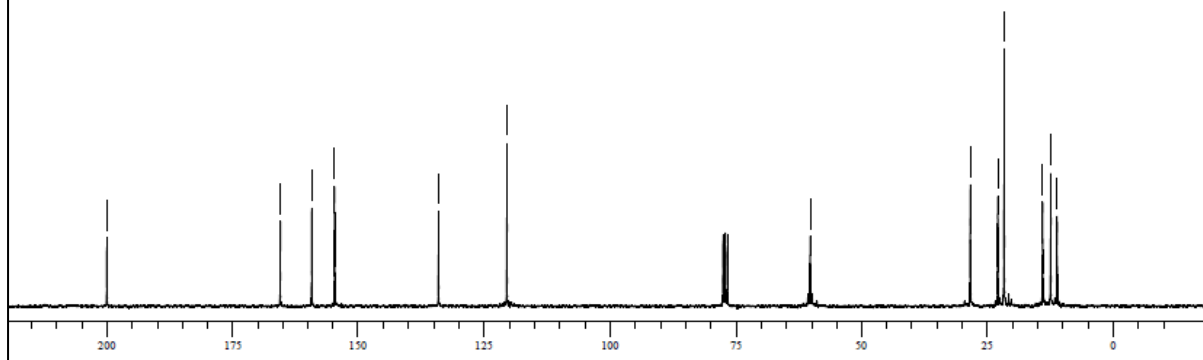

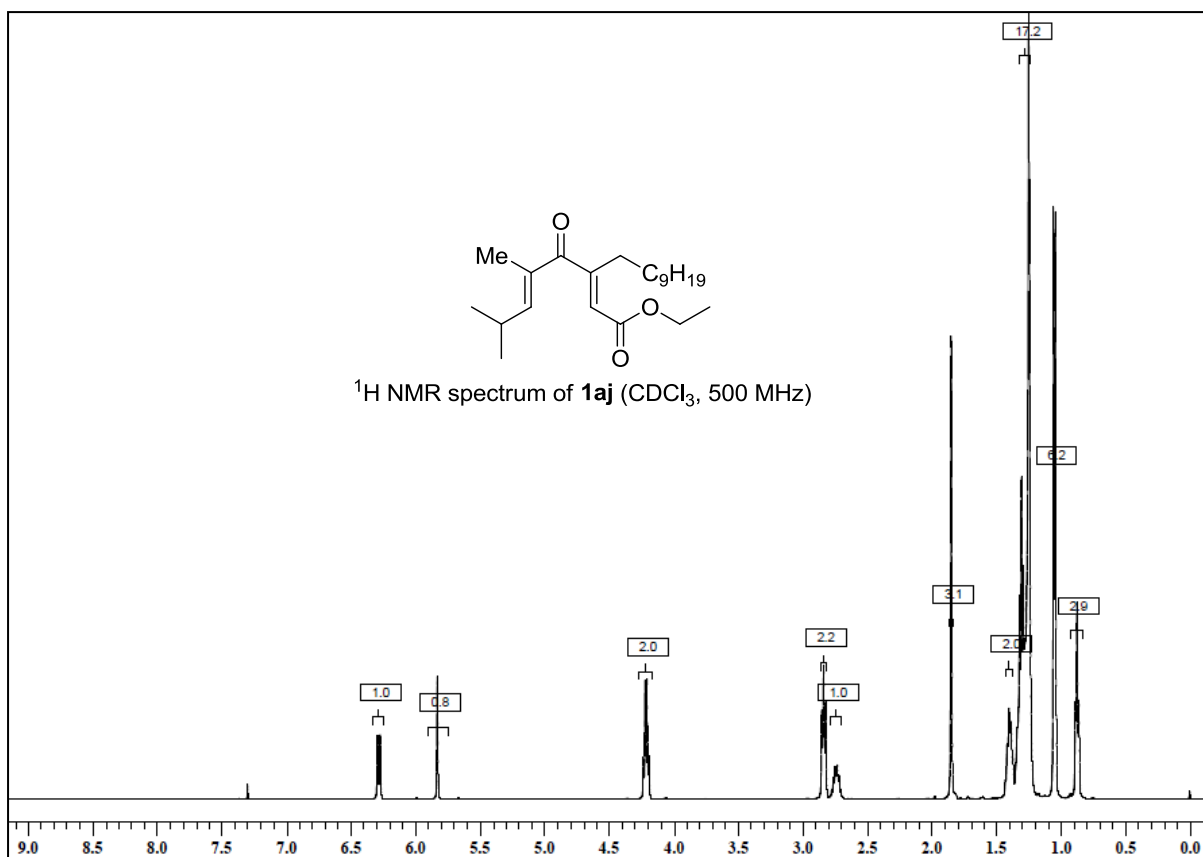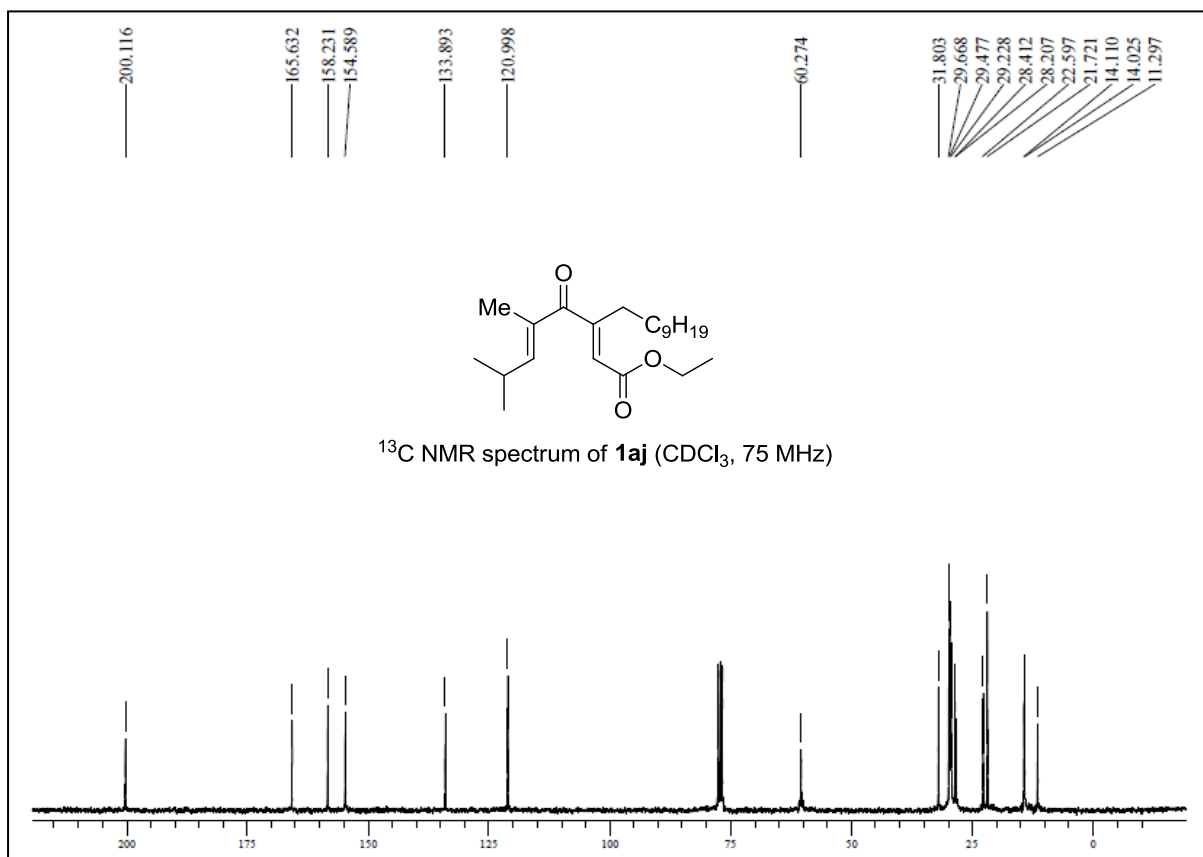

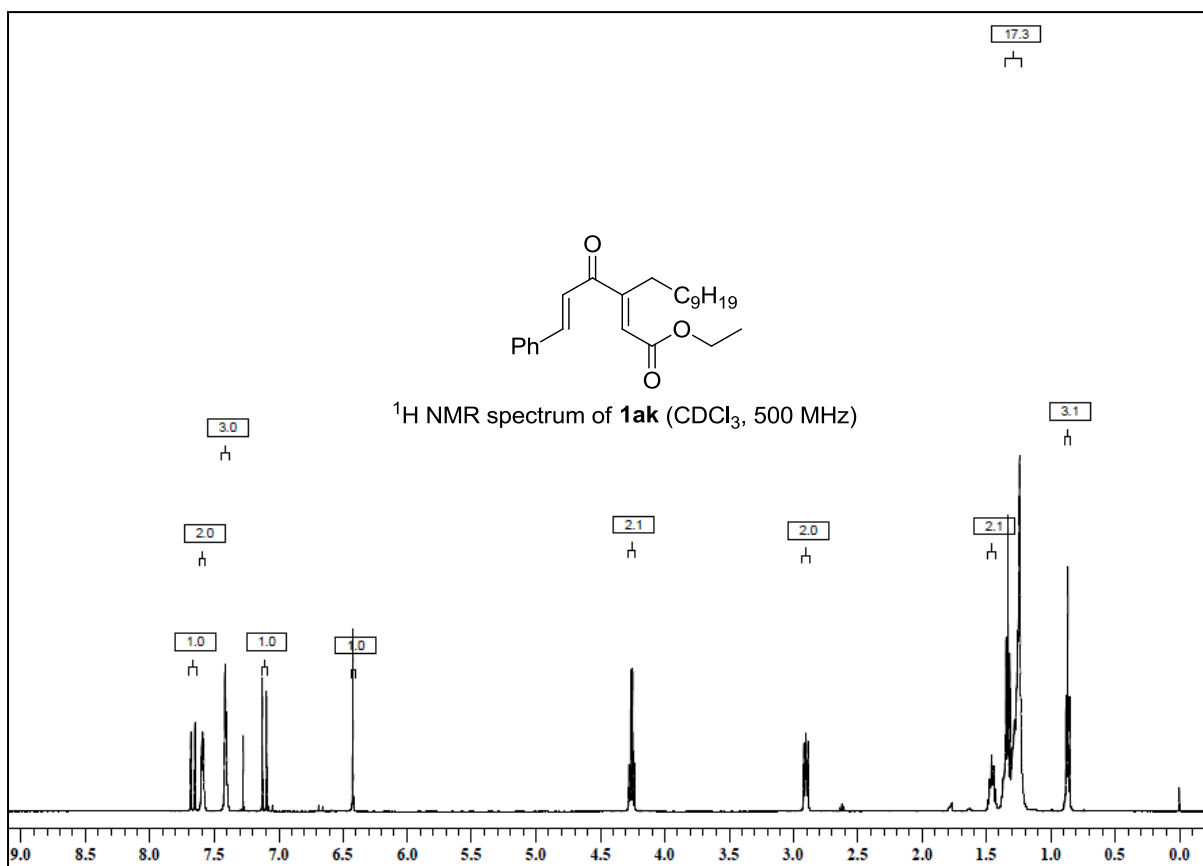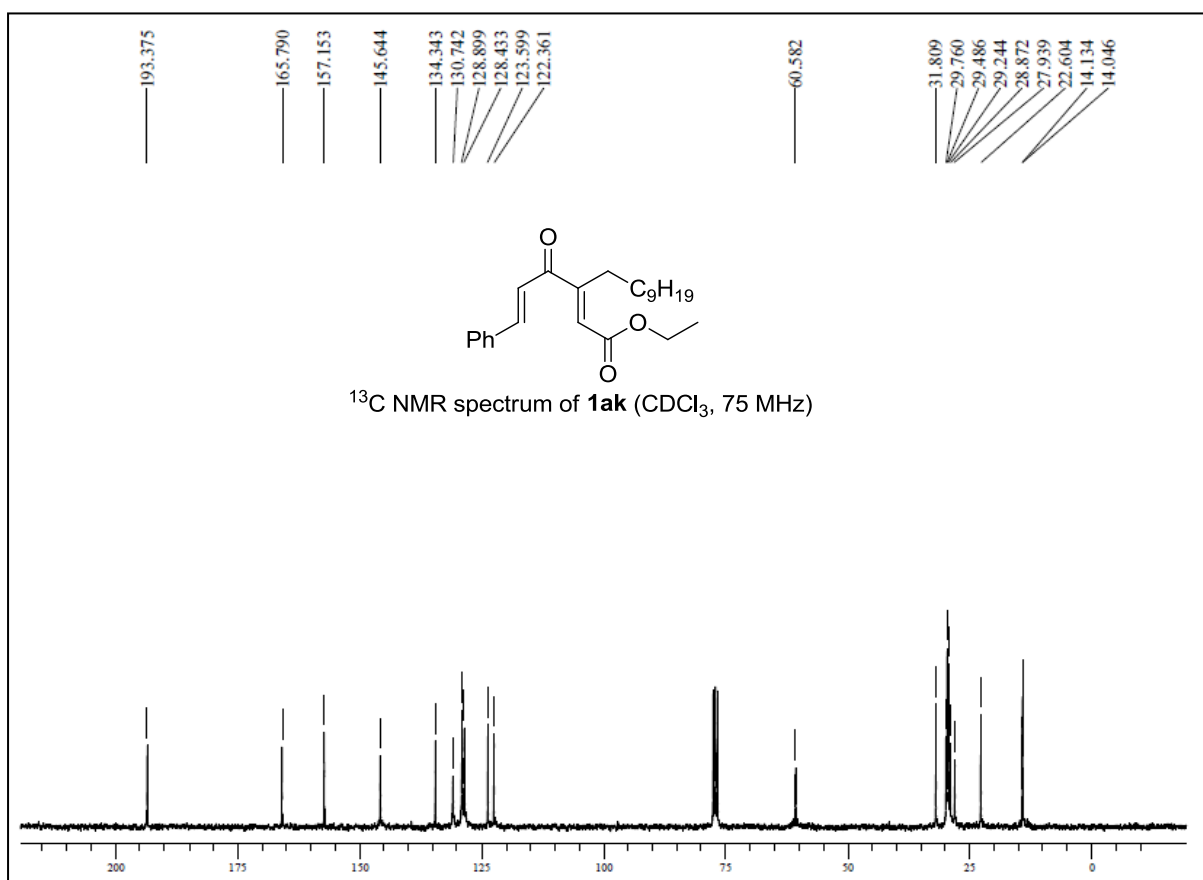



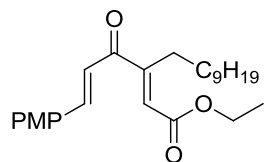

$^1\text{H}$  NMR spectrum of **1al** ( $\text{CDCl}_3$ , 300 MHz)

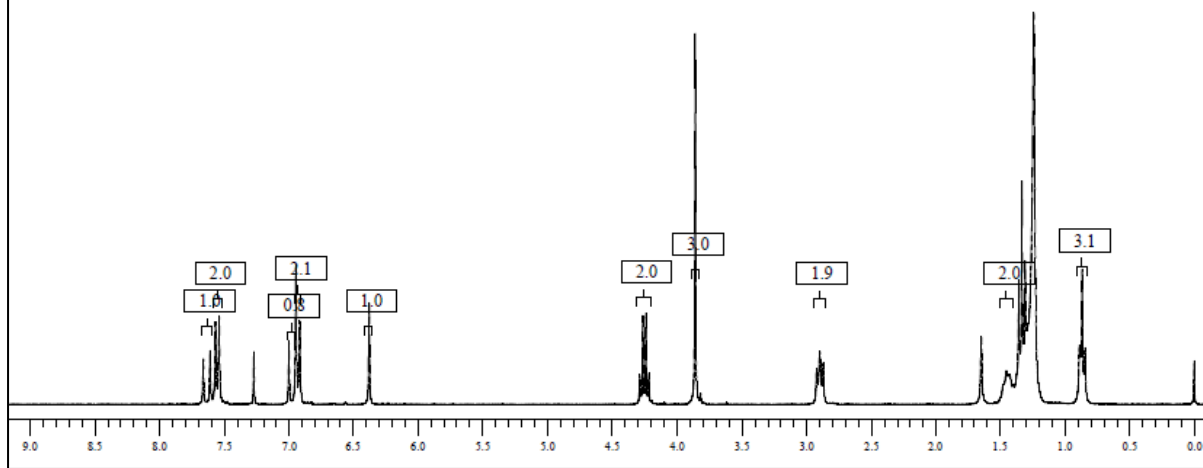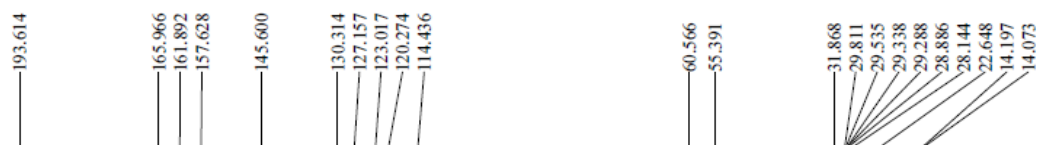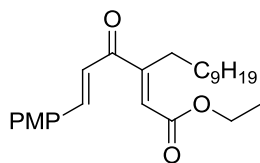

$^{13}\text{C}$  NMR spectrum of **1al** ( $\text{CDCl}_3$ , 75 MHz)

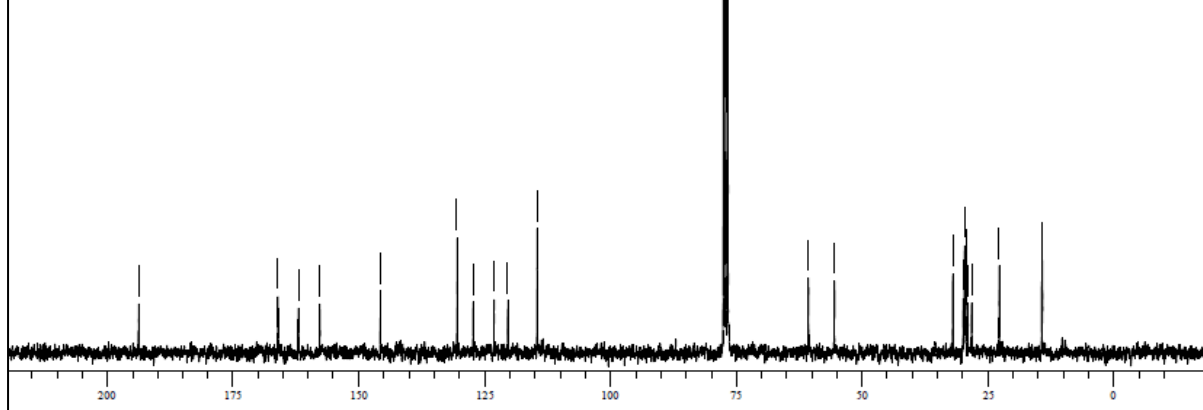

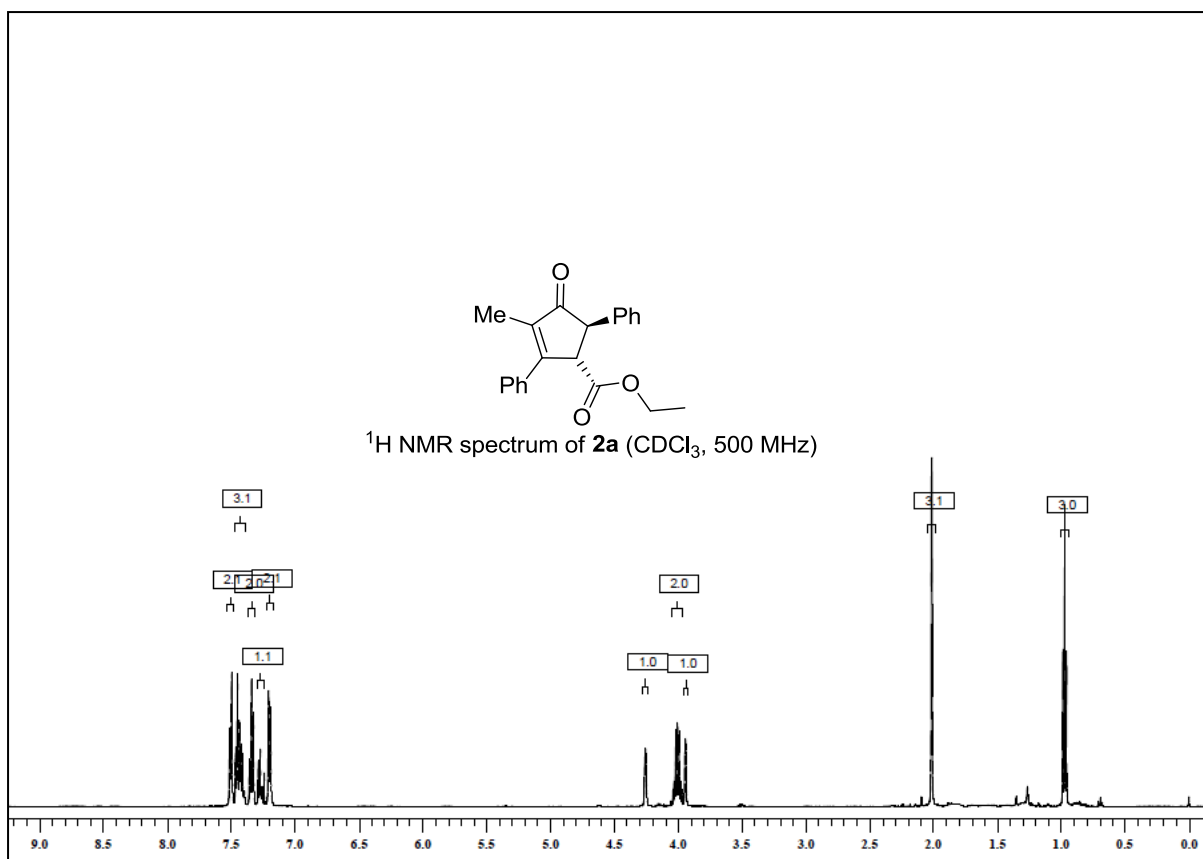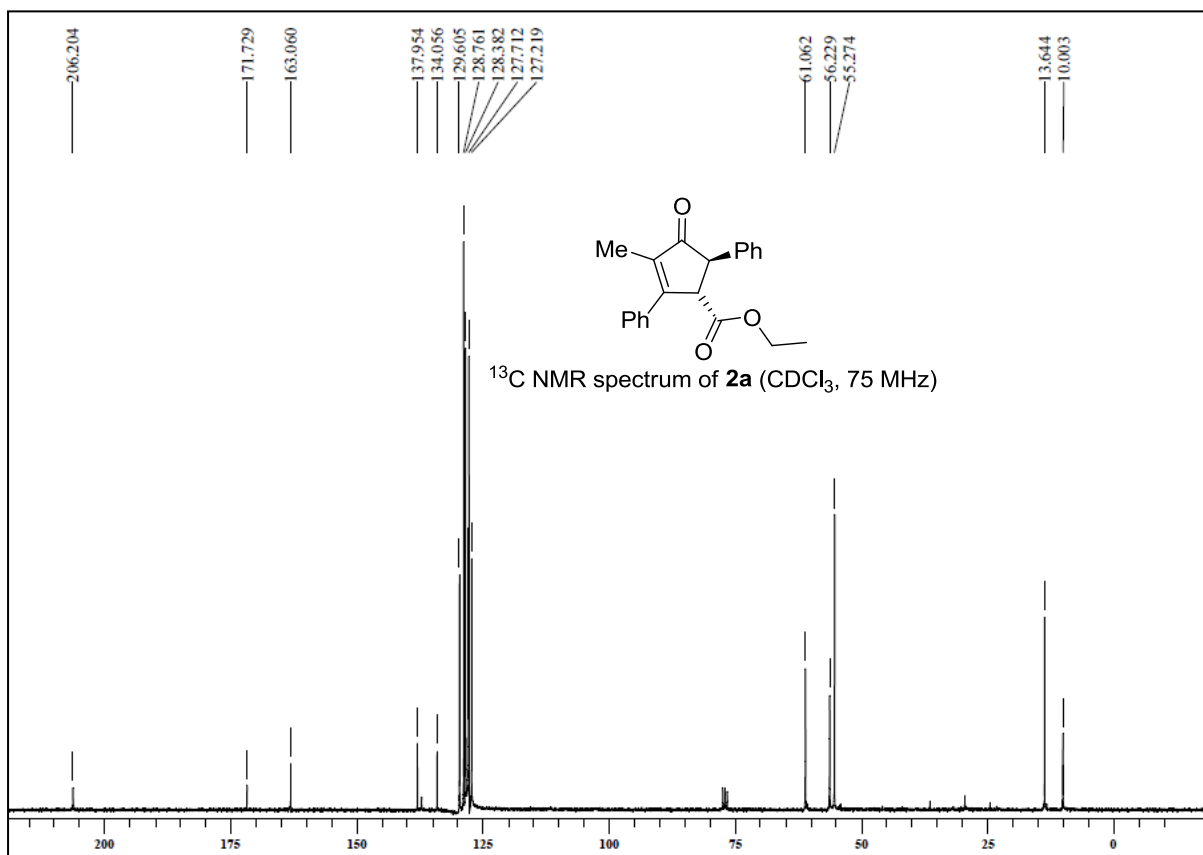

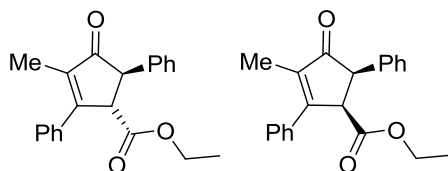

$^1\text{H}$  NMR spectrum of **2a** & **2'a** (0.6:1) ( $\text{CDCl}_3$ , 500 MHz)

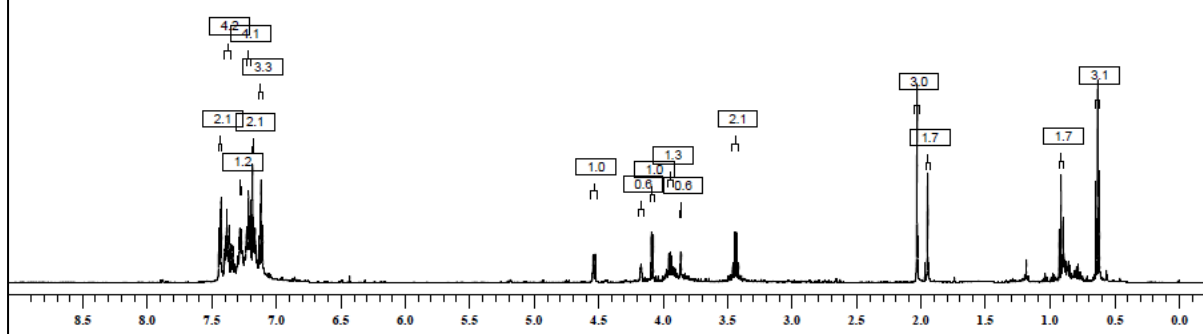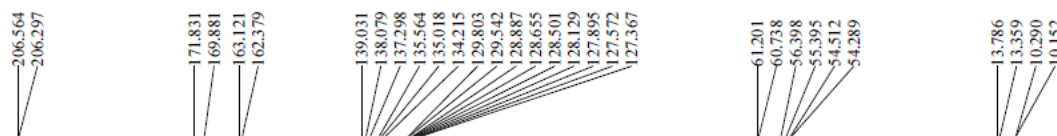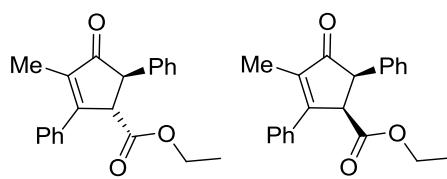

$^{13}\text{C}$  NMR spectrum of **2a** & **2'a** ( $\text{CDCl}_3$ , 125 MHz)

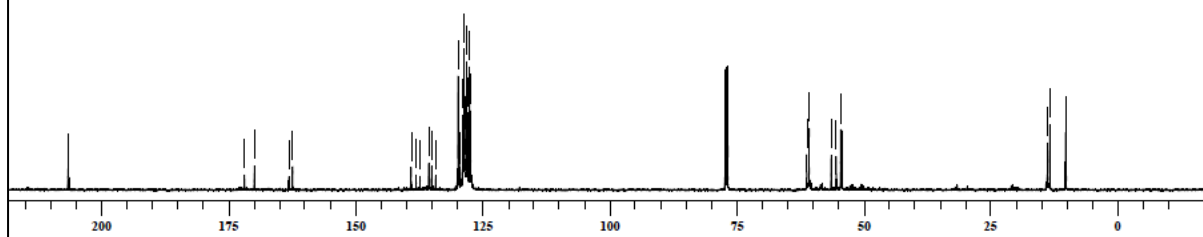

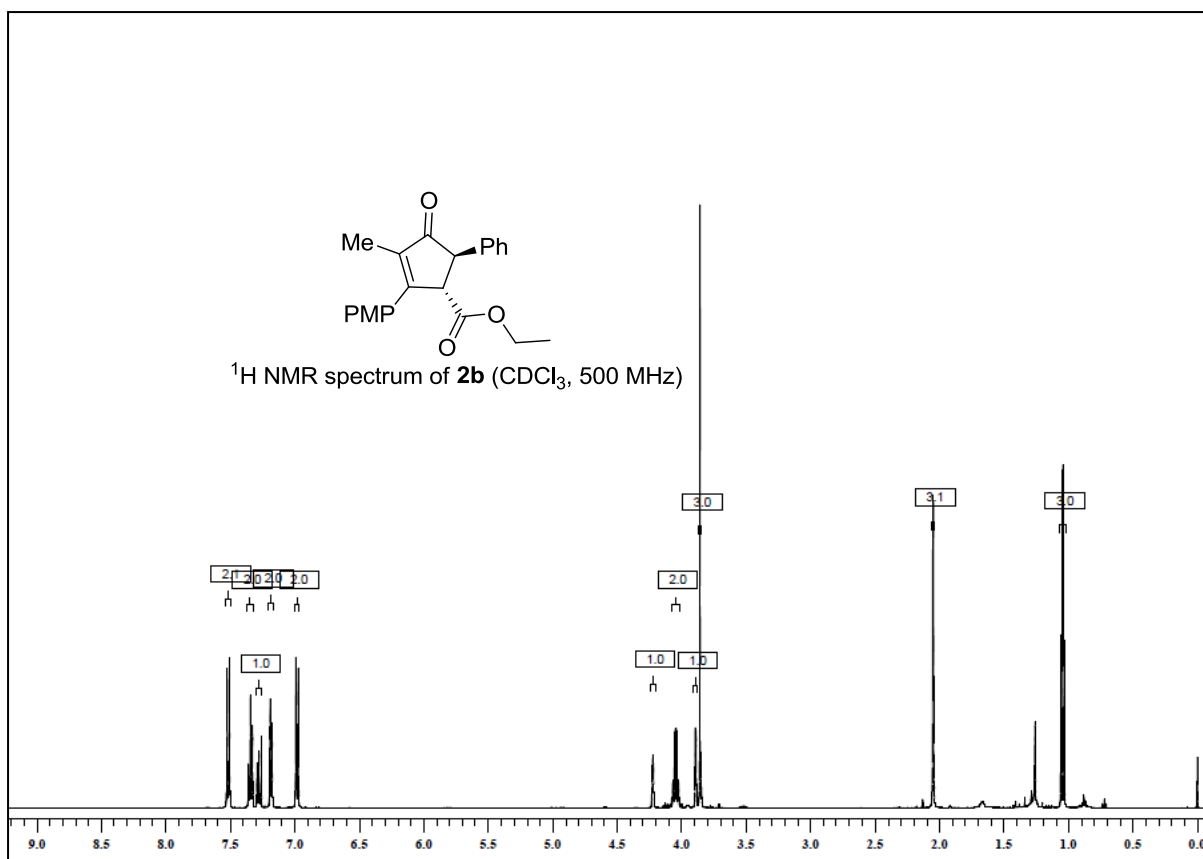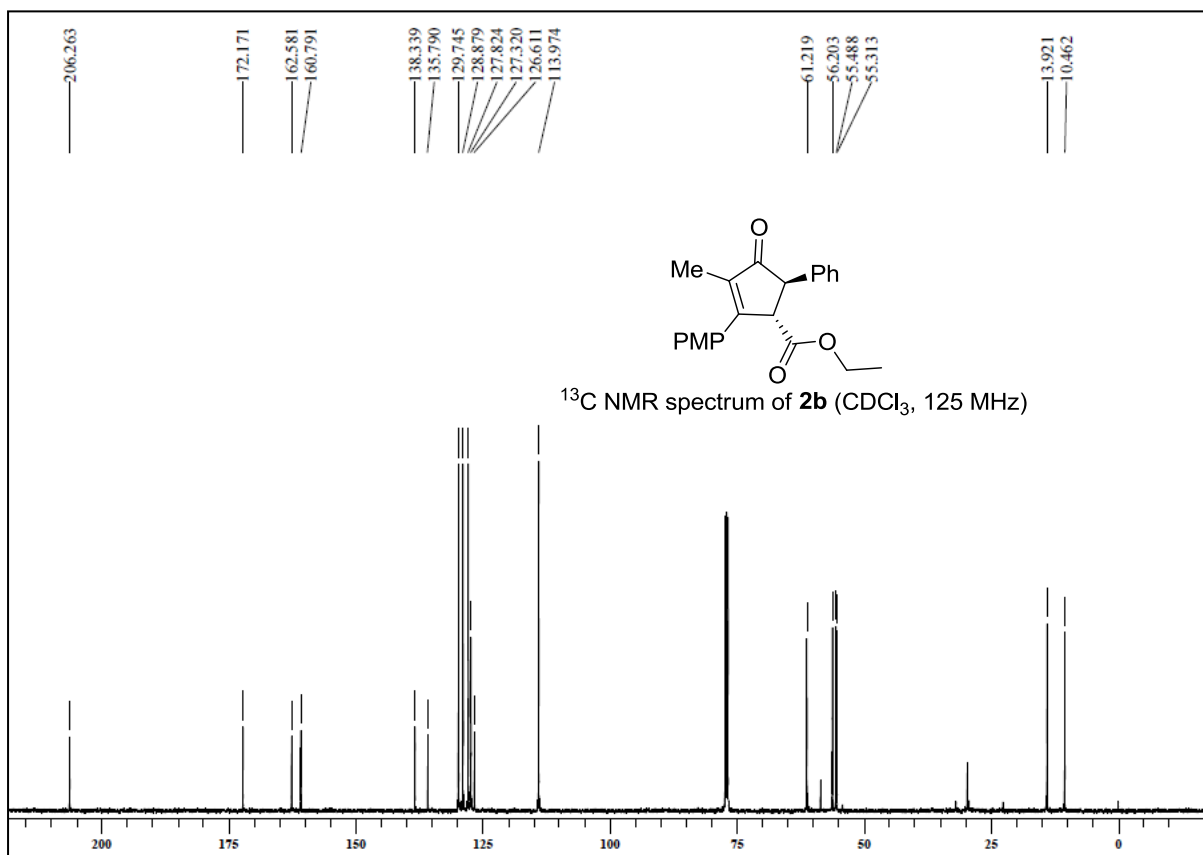

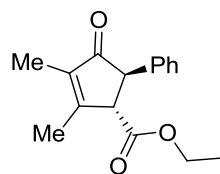

$^1\text{H}$  NMR spectrum of **2c** ( $\text{CDCl}_3$ , 500 MHz)

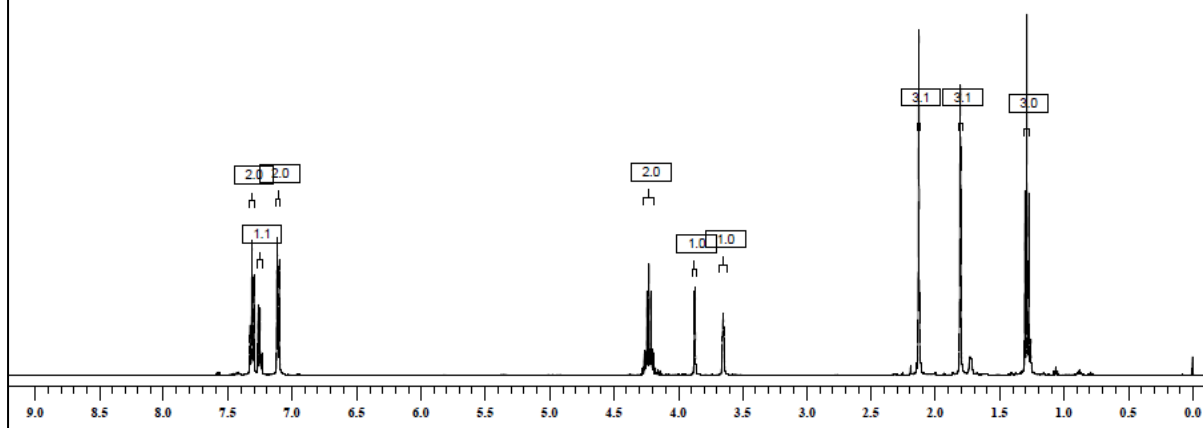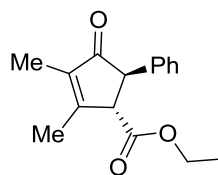

$^{13}\text{C}$  NMR spectrum of **2c** ( $\text{CDCl}_3$ , 75 MHz)

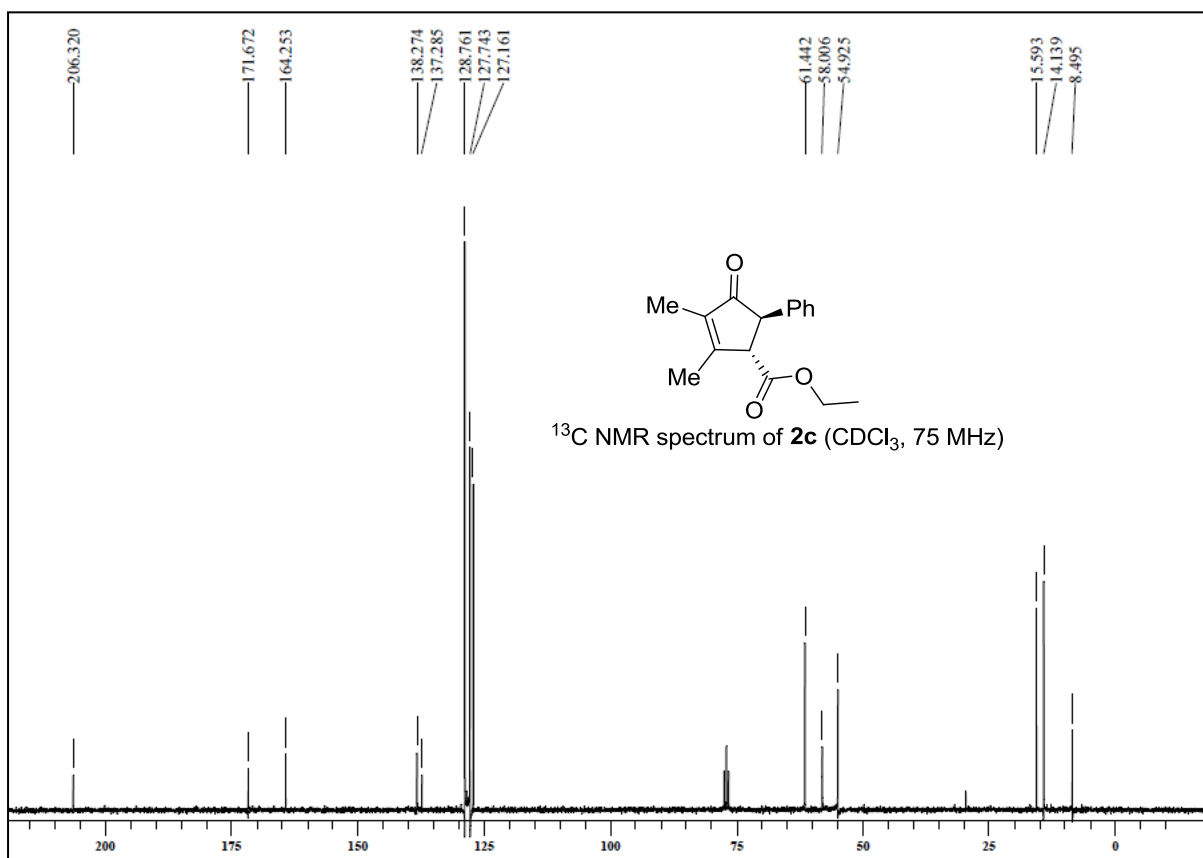

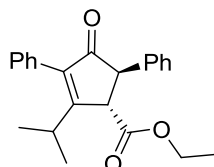

$^1\text{H}$  NMR spectrum of **2d** ( $\text{CDCl}_3$ , 500 MHz)

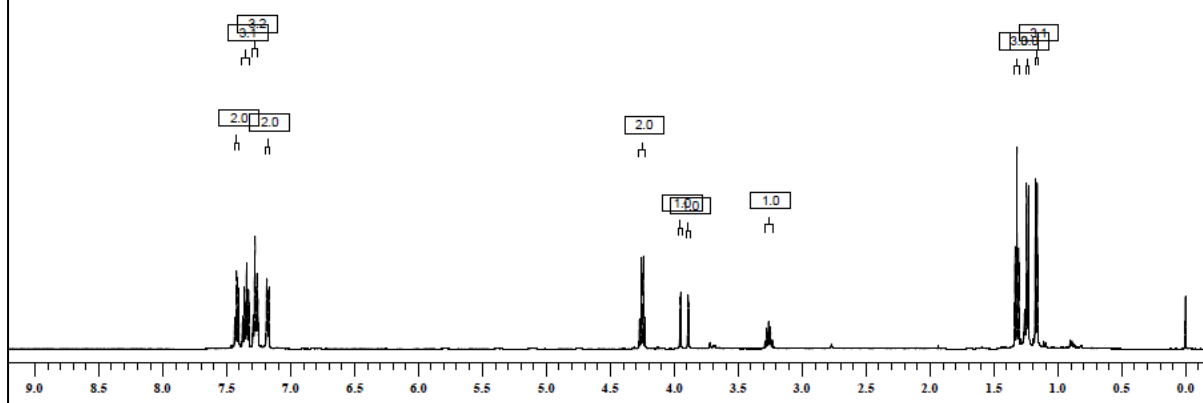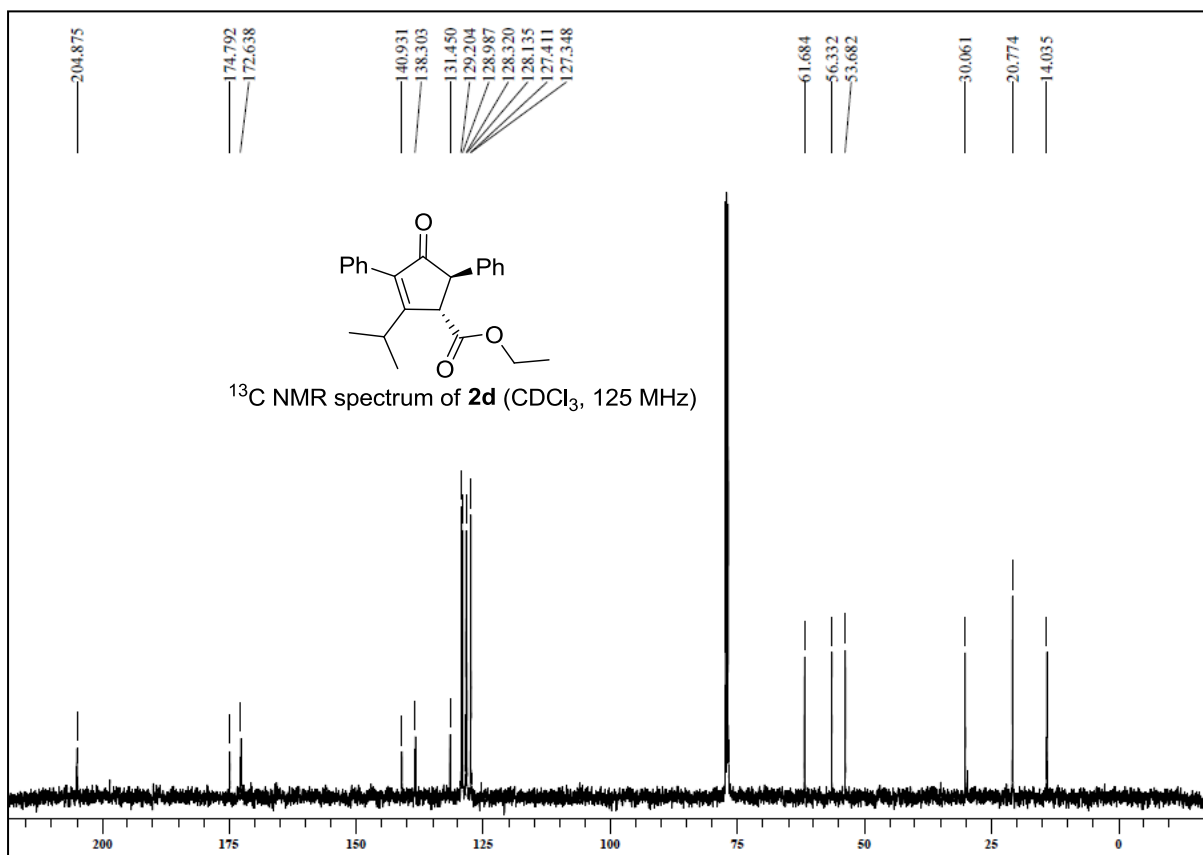

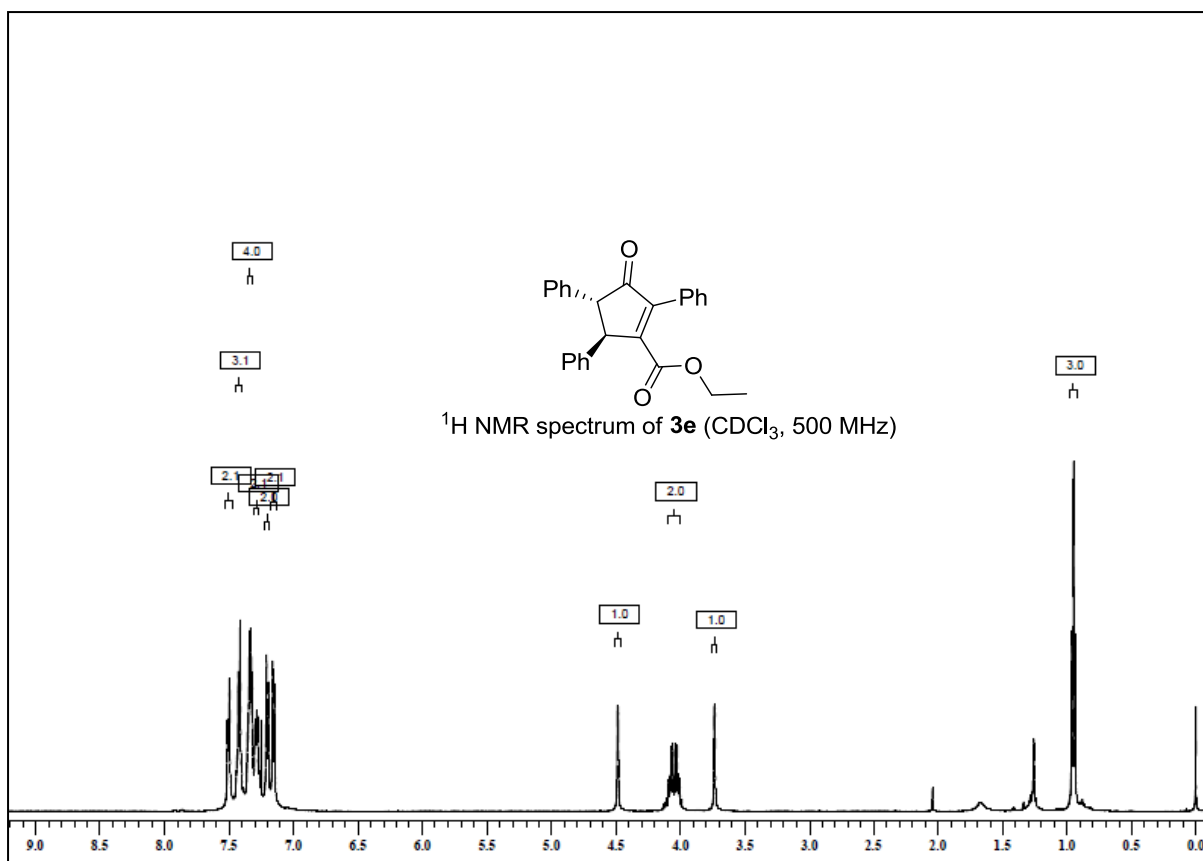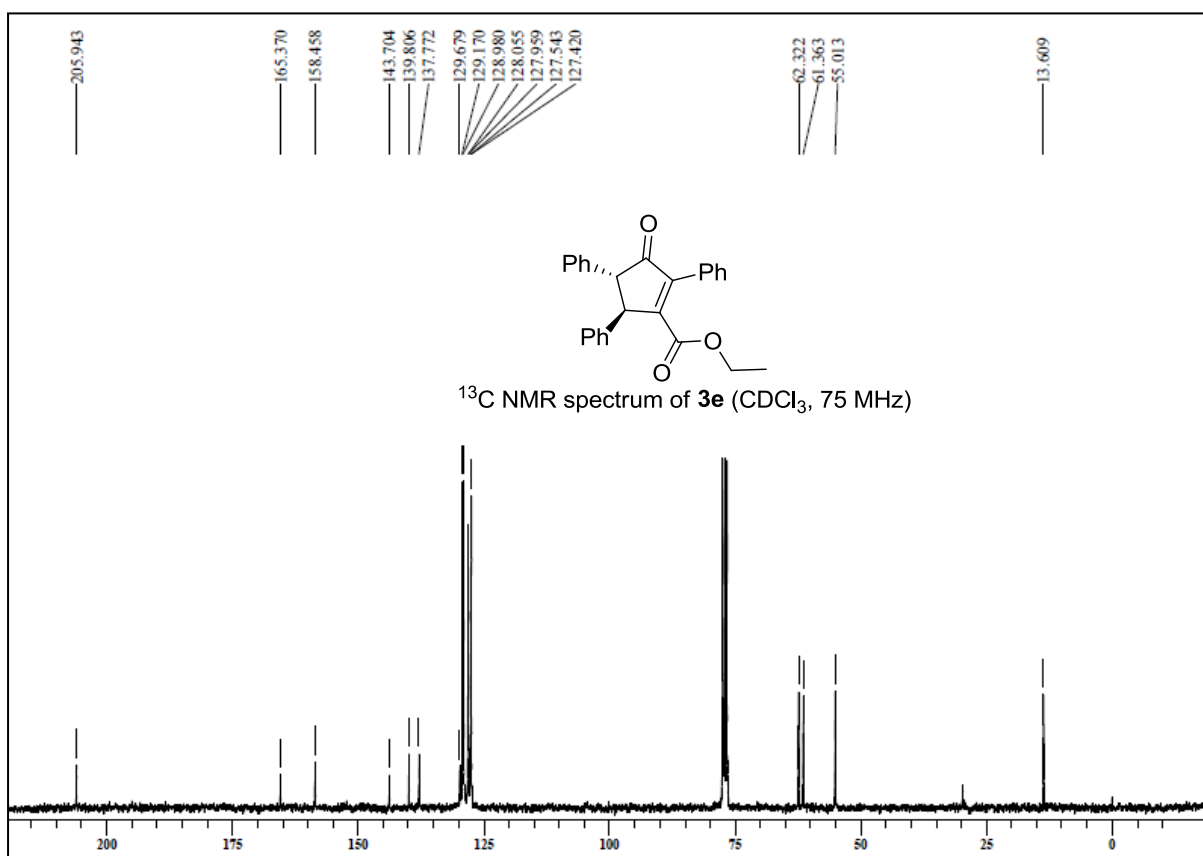

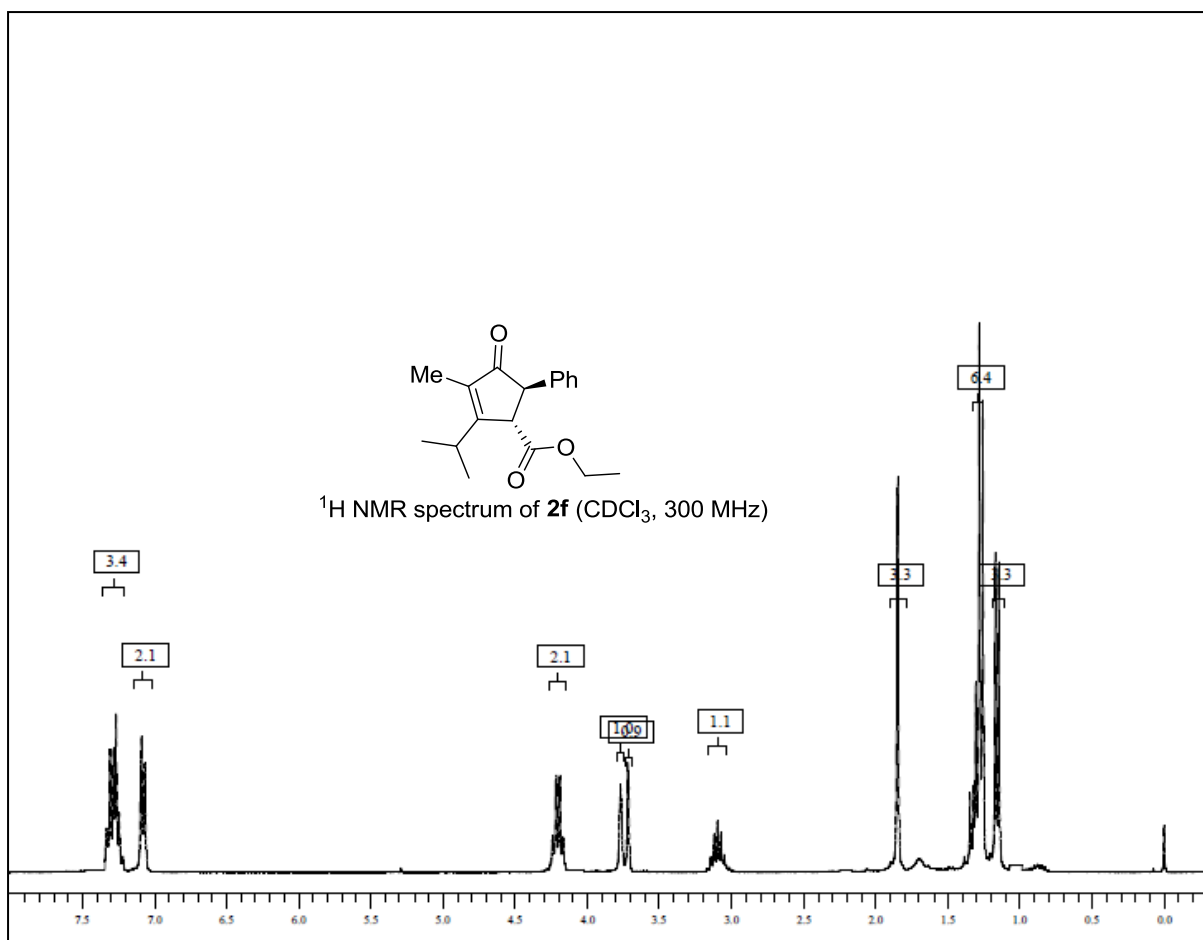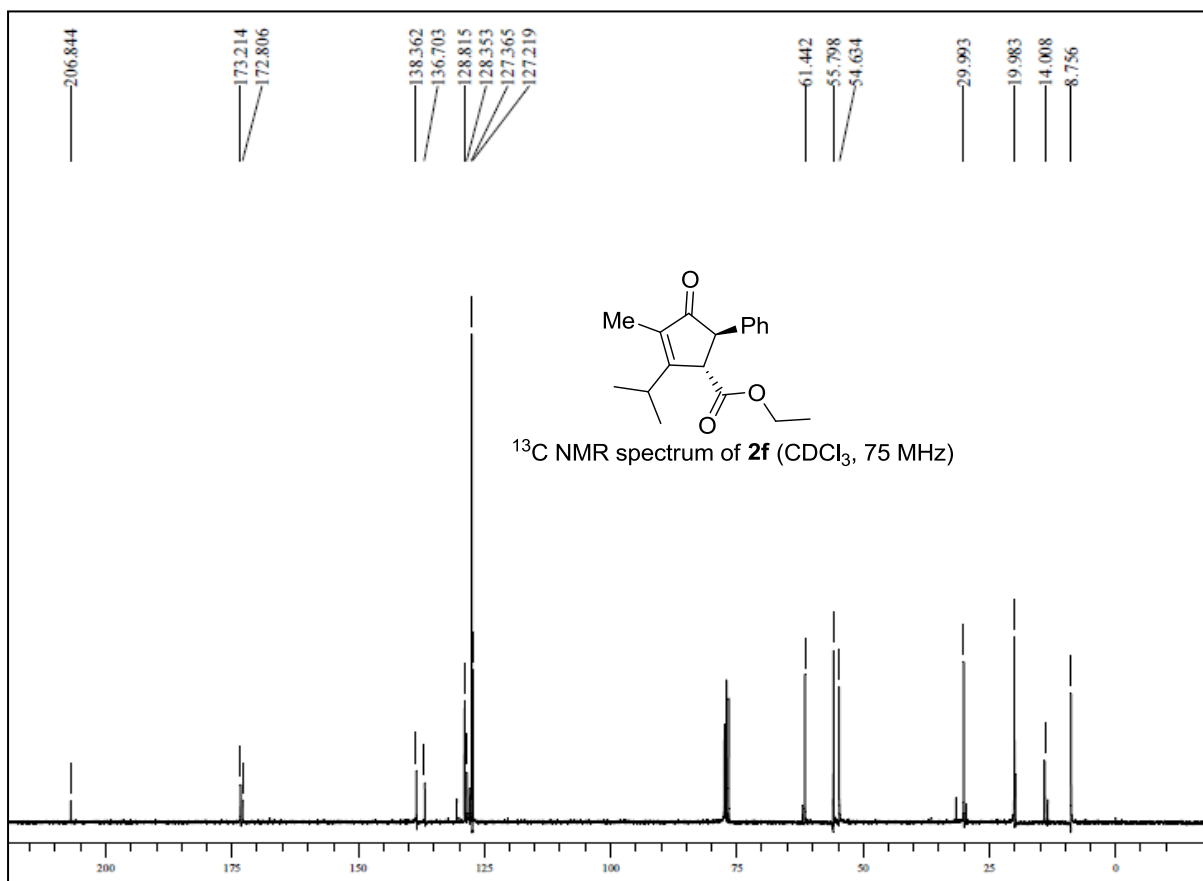



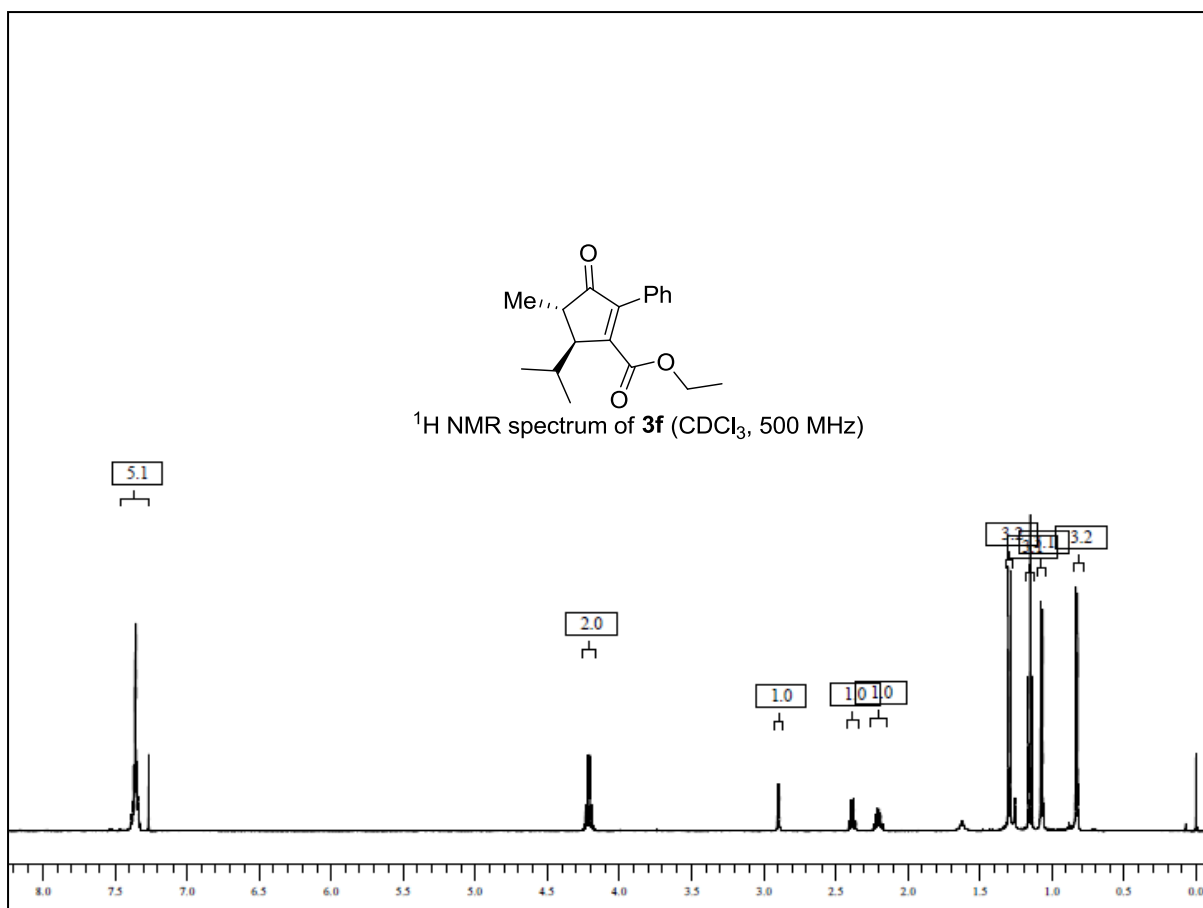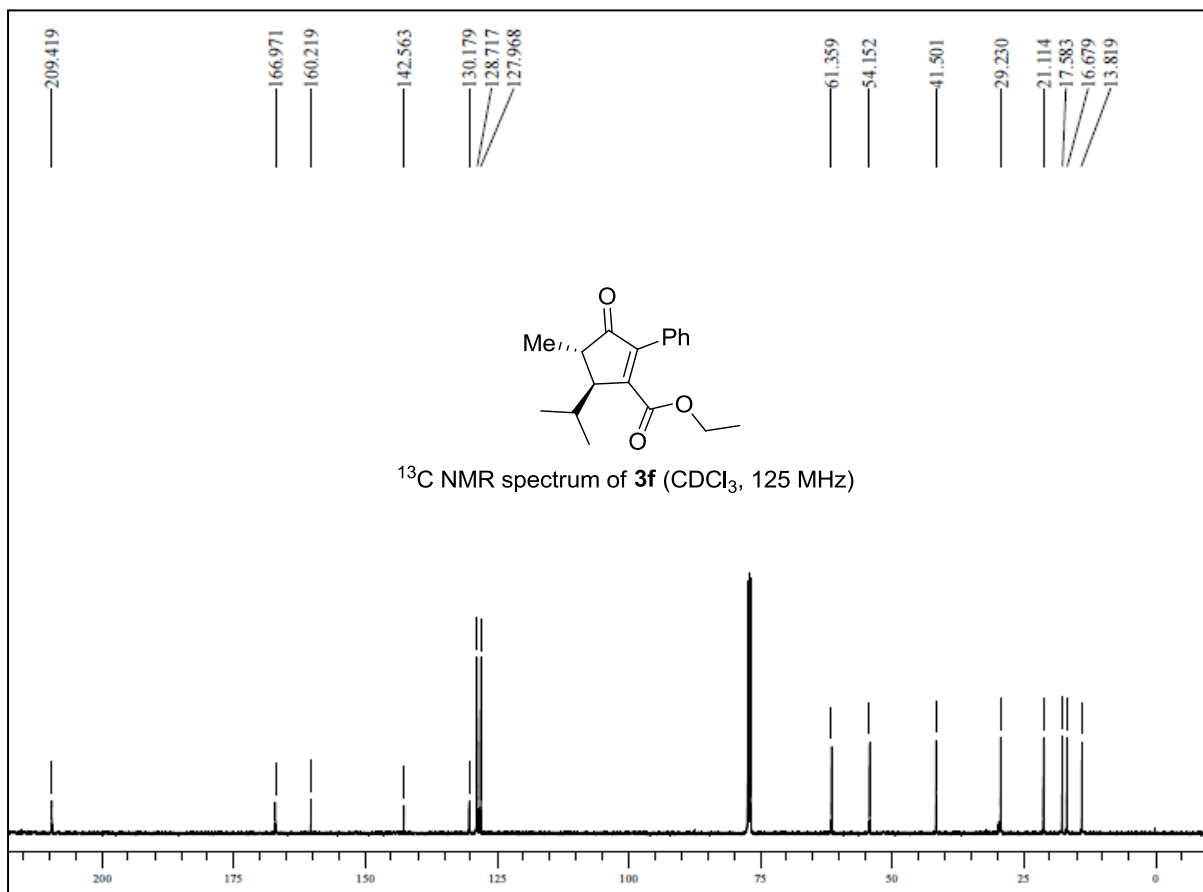

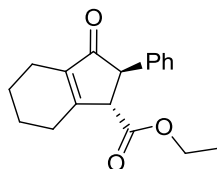

$^1\text{H}$  NMR spectrum of **2g** ( $\text{CDCl}_3$ , 500 MHz)

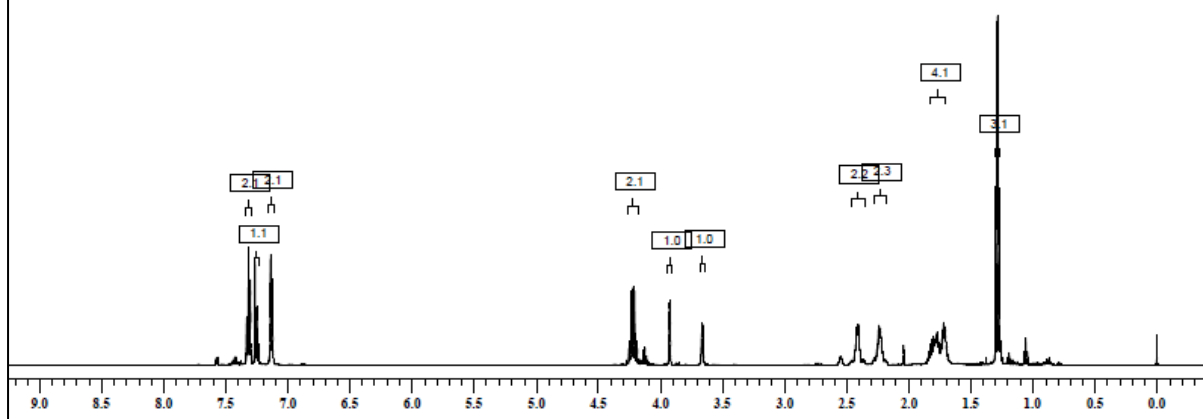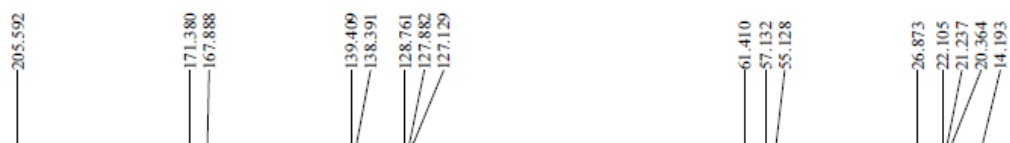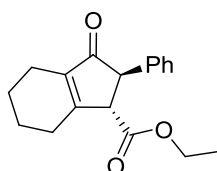

$^{13}\text{C}$  NMR spectrum of **2g** ( $\text{CDCl}_3$ , 75 MHz)

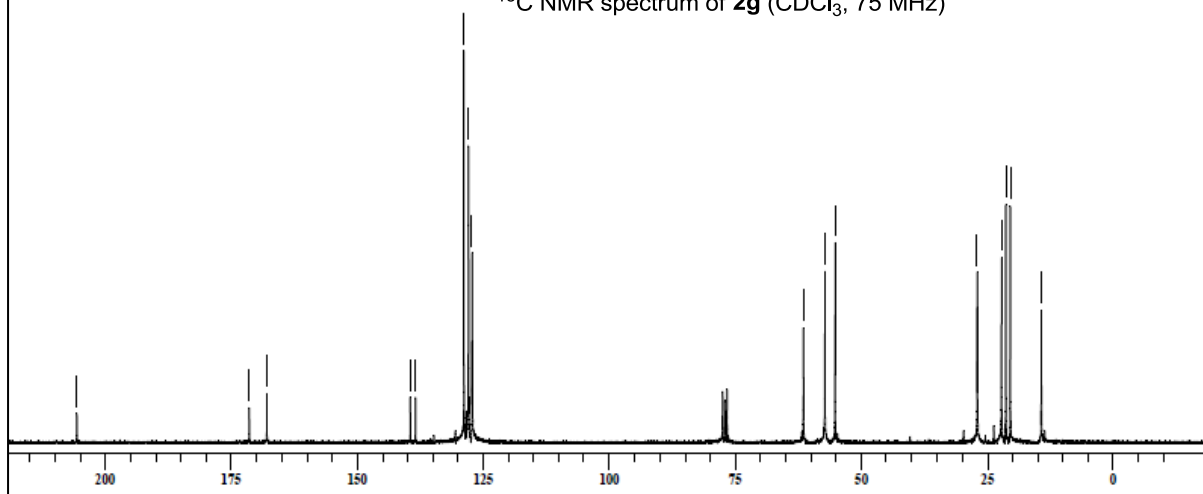

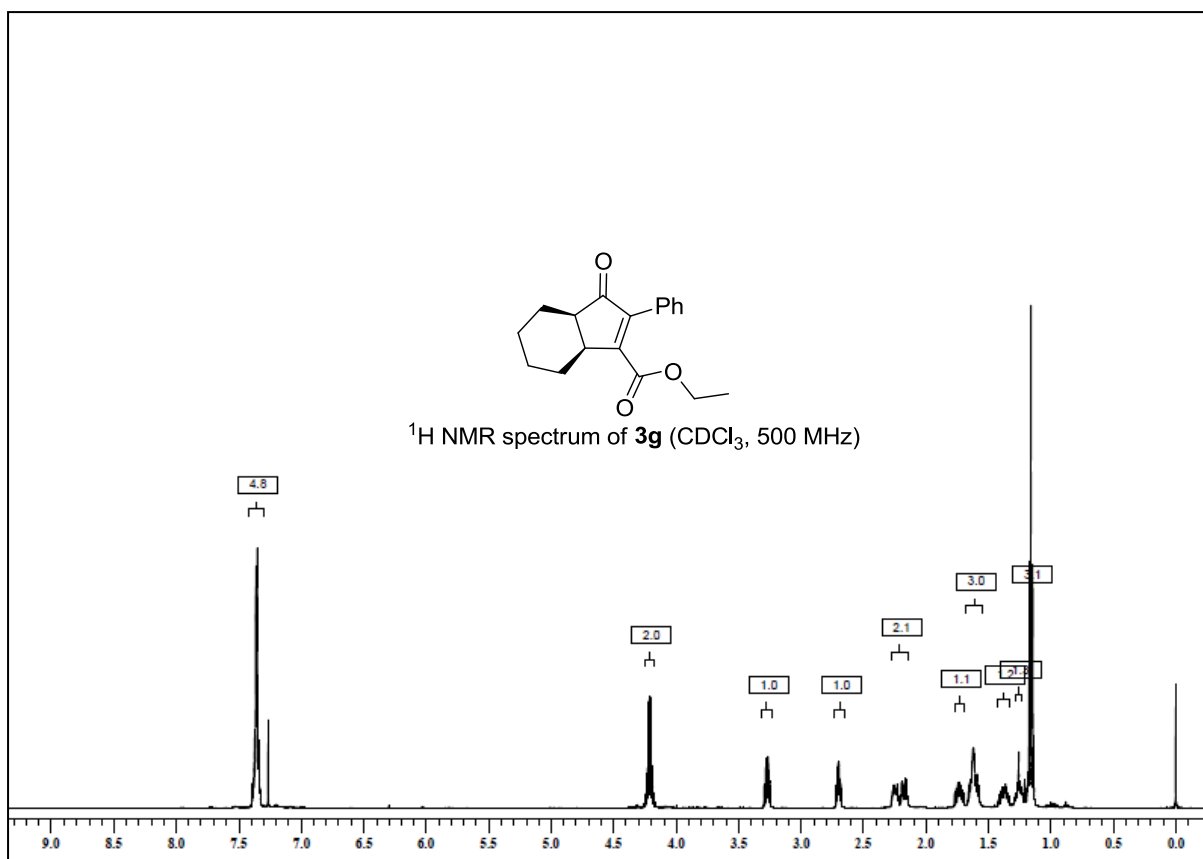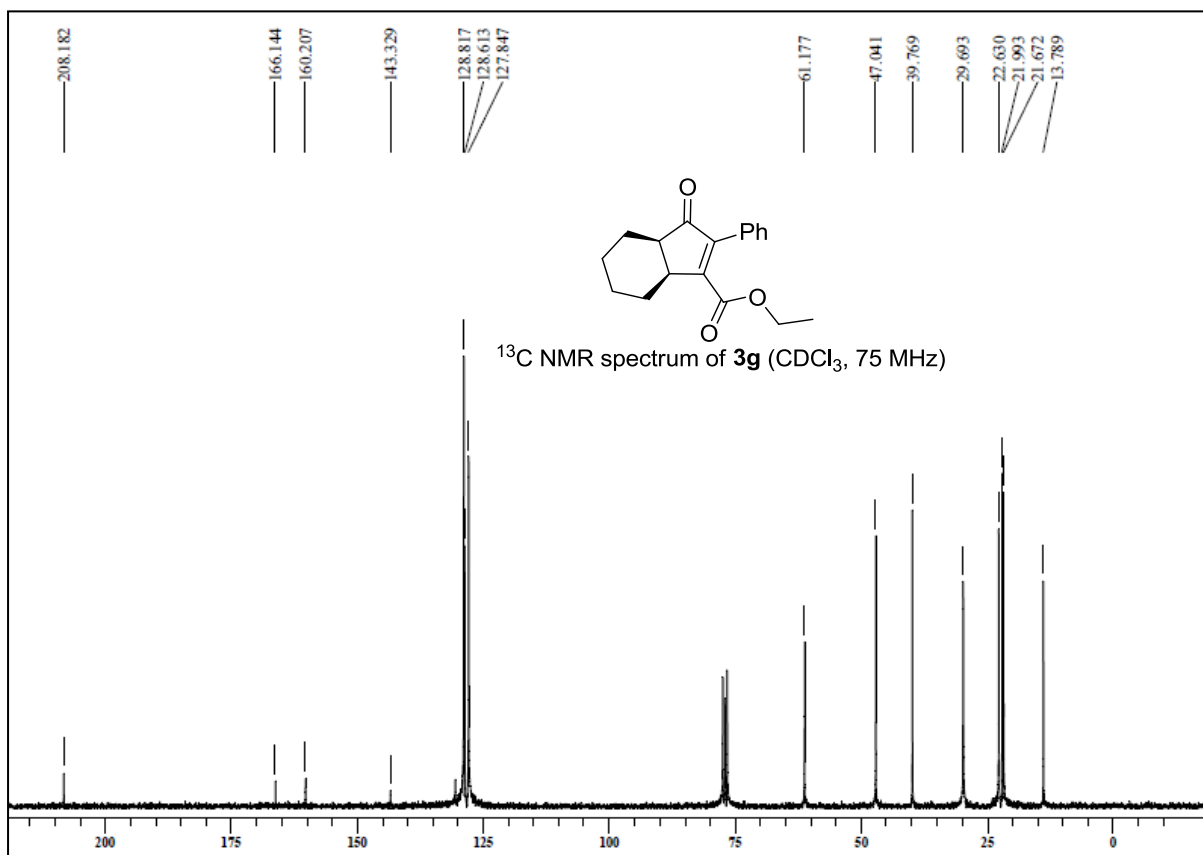

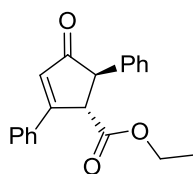

$^1\text{H}$  NMR spectrum of **2h** ( $\text{CDCl}_3$ , 300 MHz)

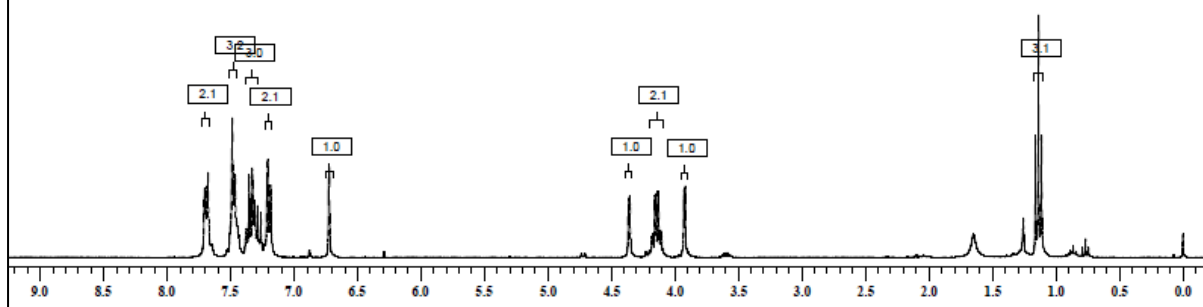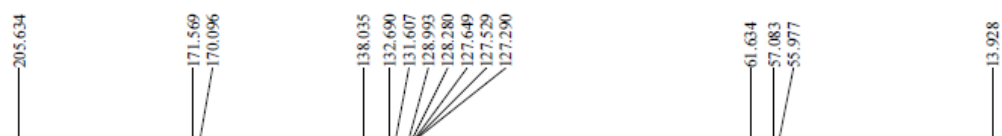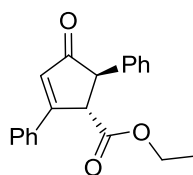

$^{13}\text{C}$  NMR spectrum of **2h** ( $\text{CDCl}_3$ , 125 MHz)

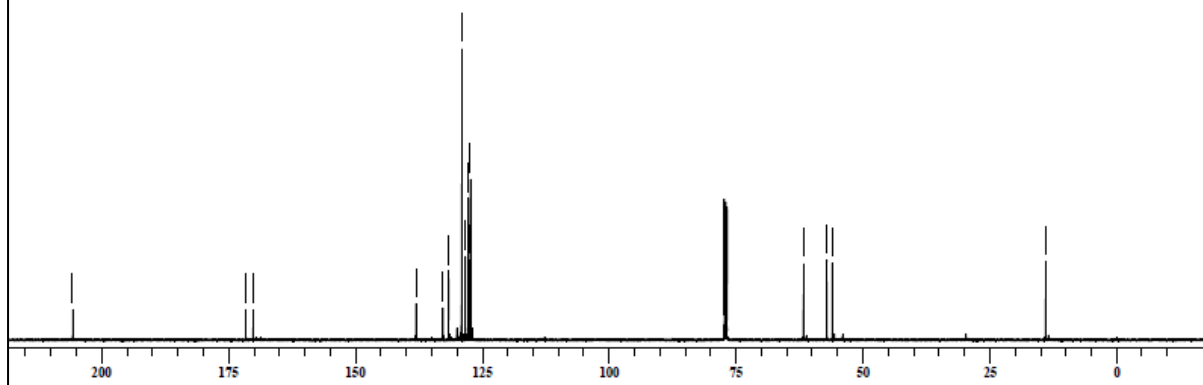

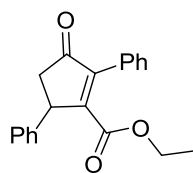

$^1\text{H}$  NMR spectrum of **3h** ( $\text{CDCl}_3$ , 500 MHz)

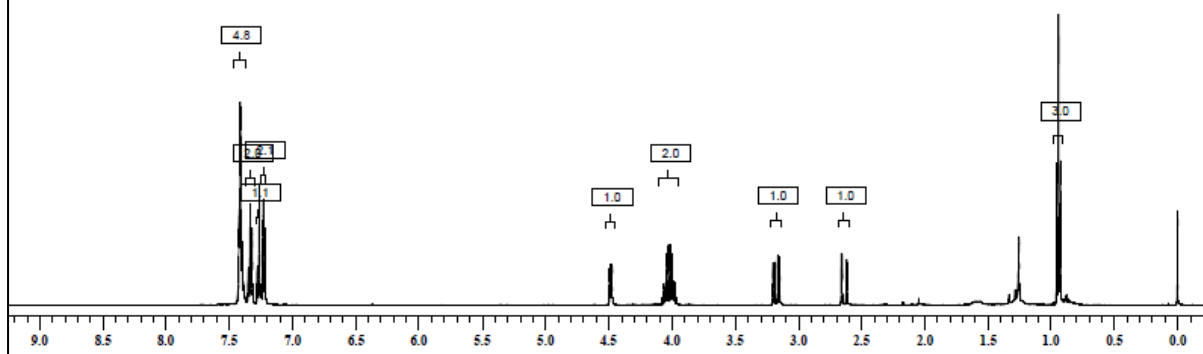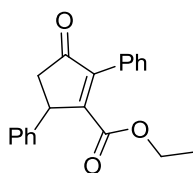

$^{13}\text{C}$  NMR spectrum of **3h** ( $\text{CDCl}_3$ , 125 MHz)

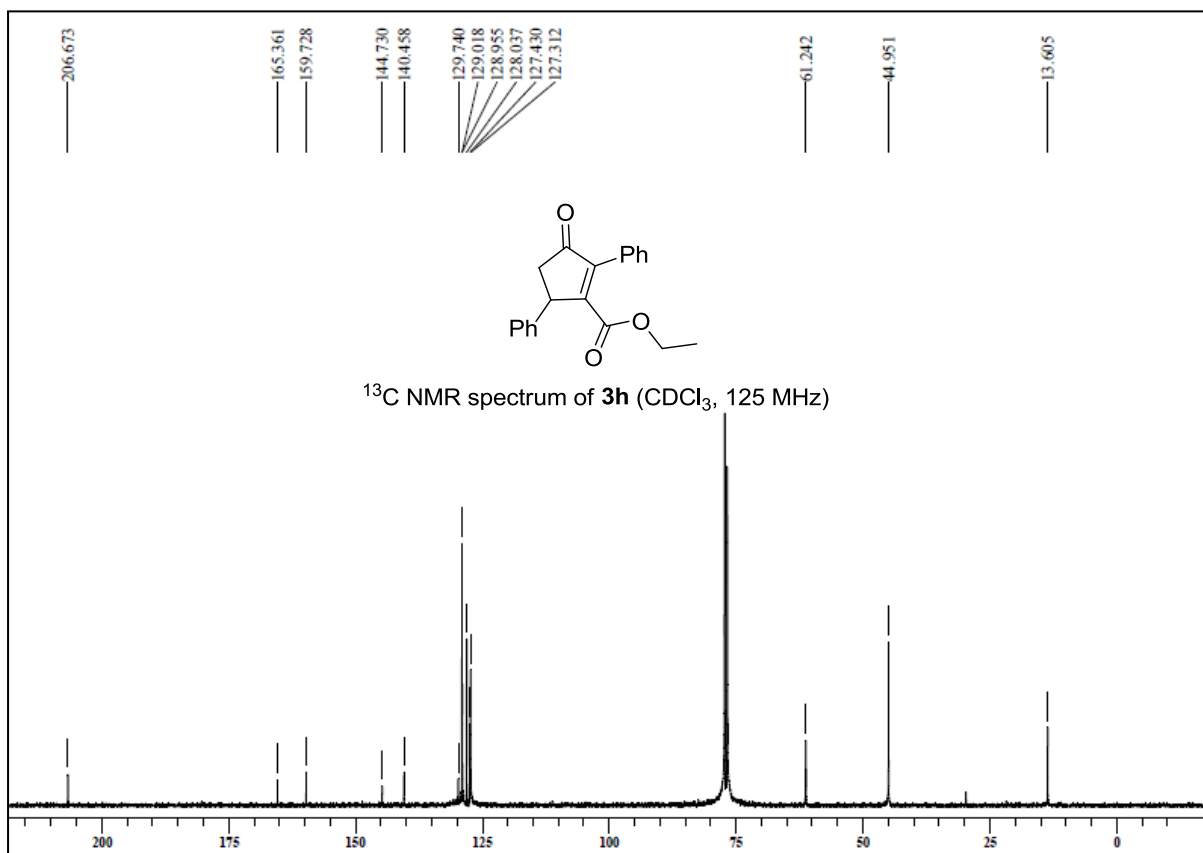

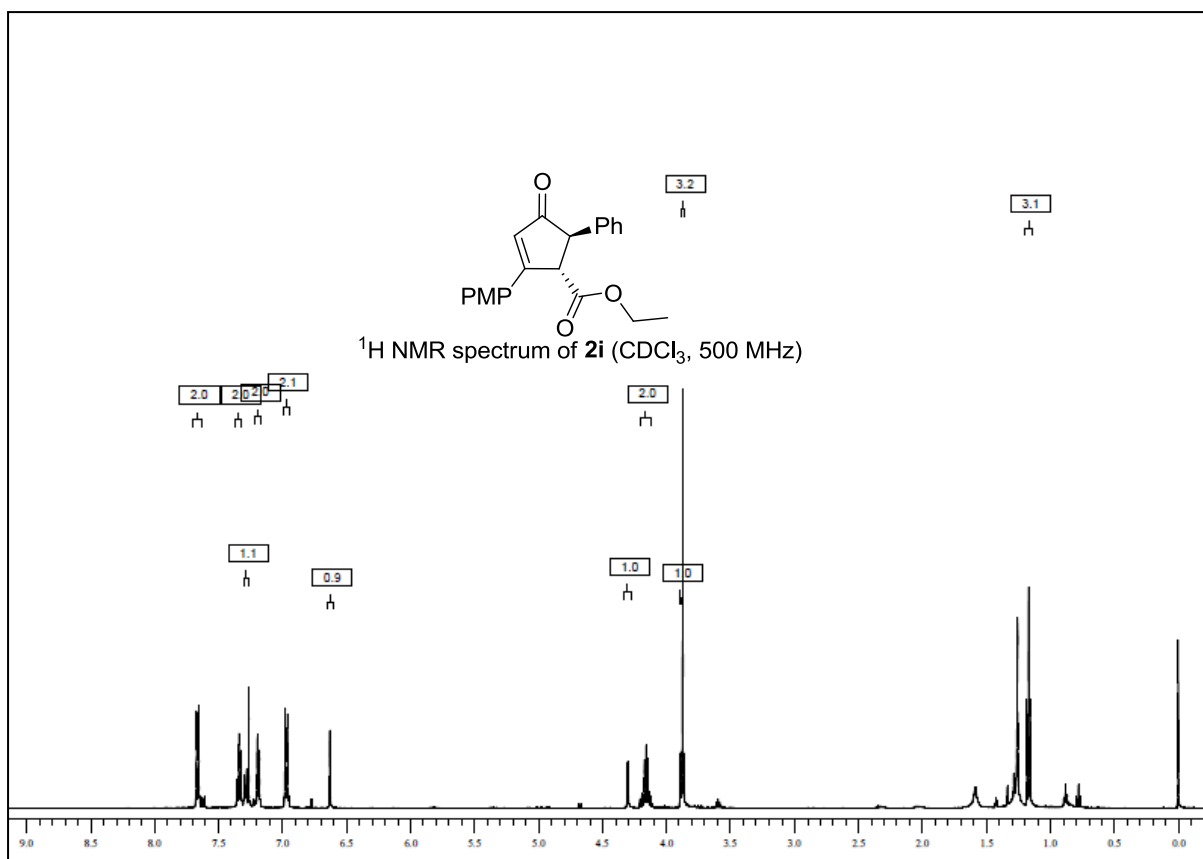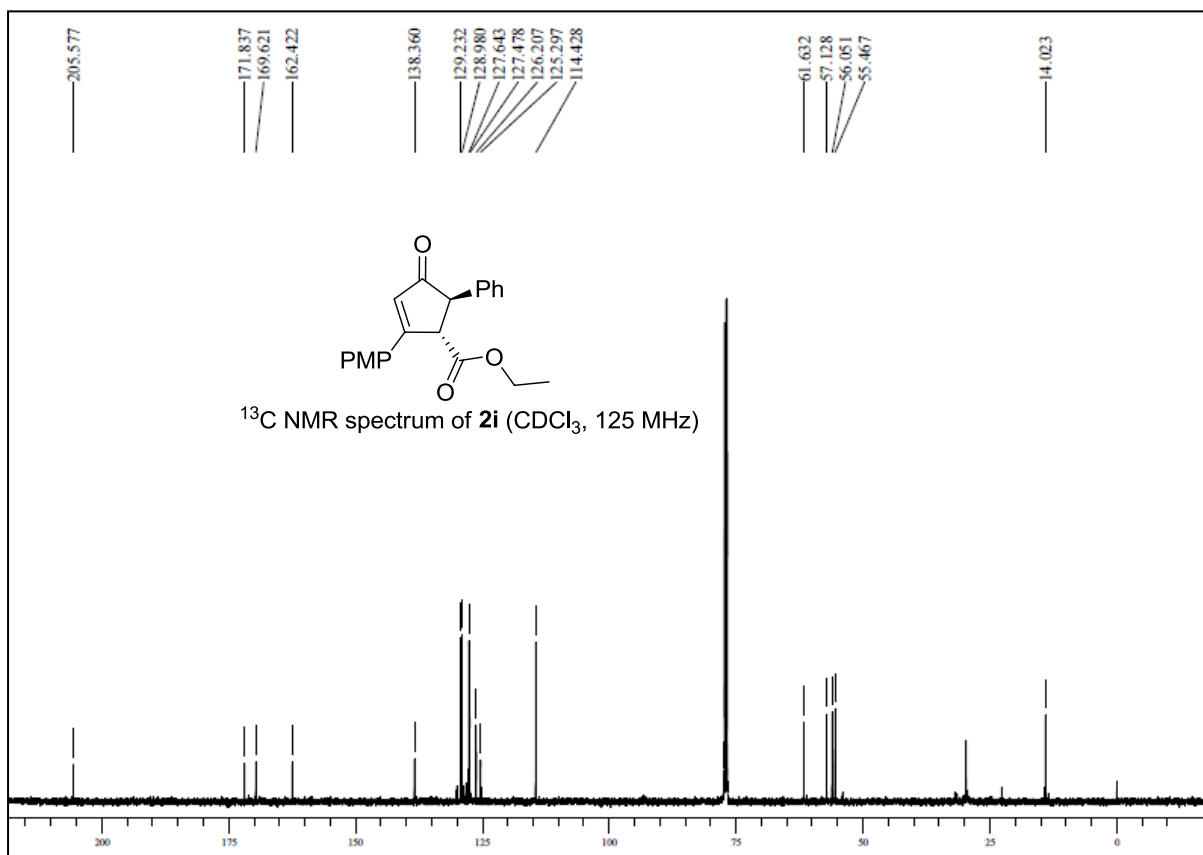

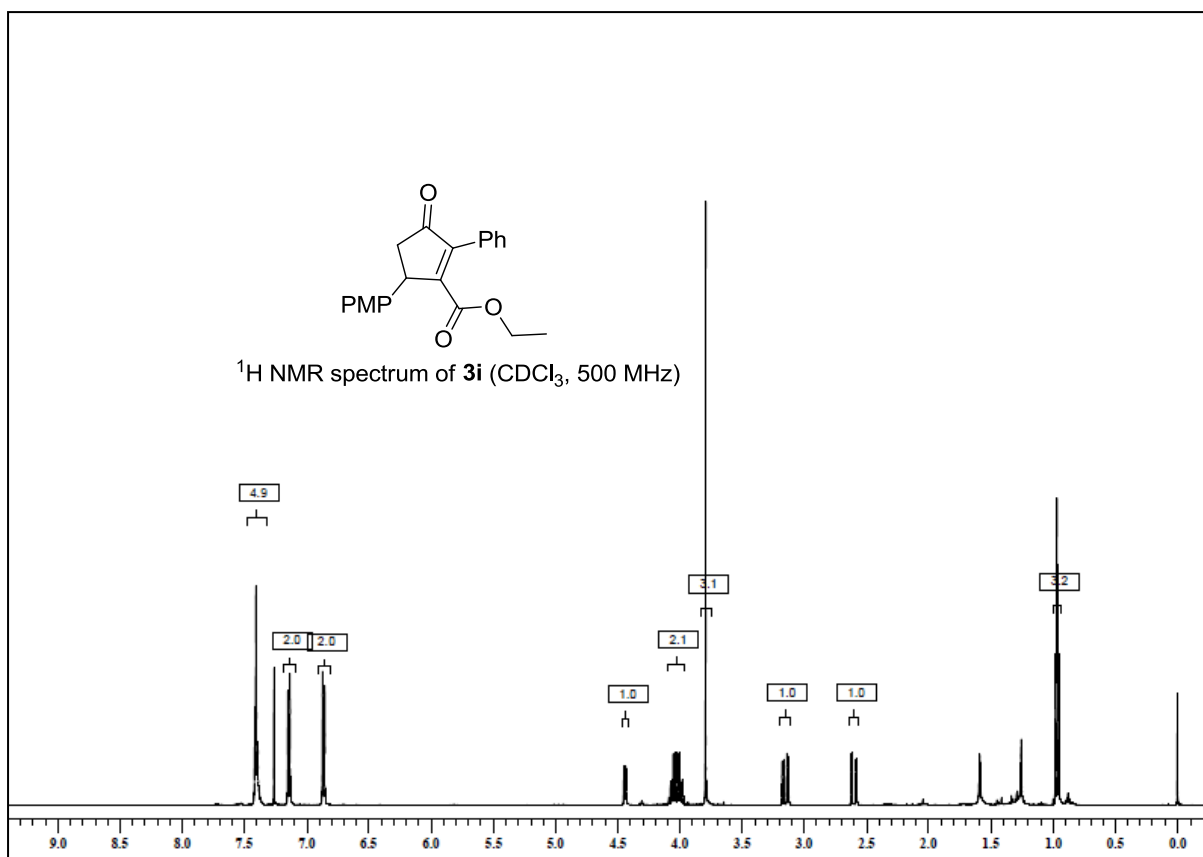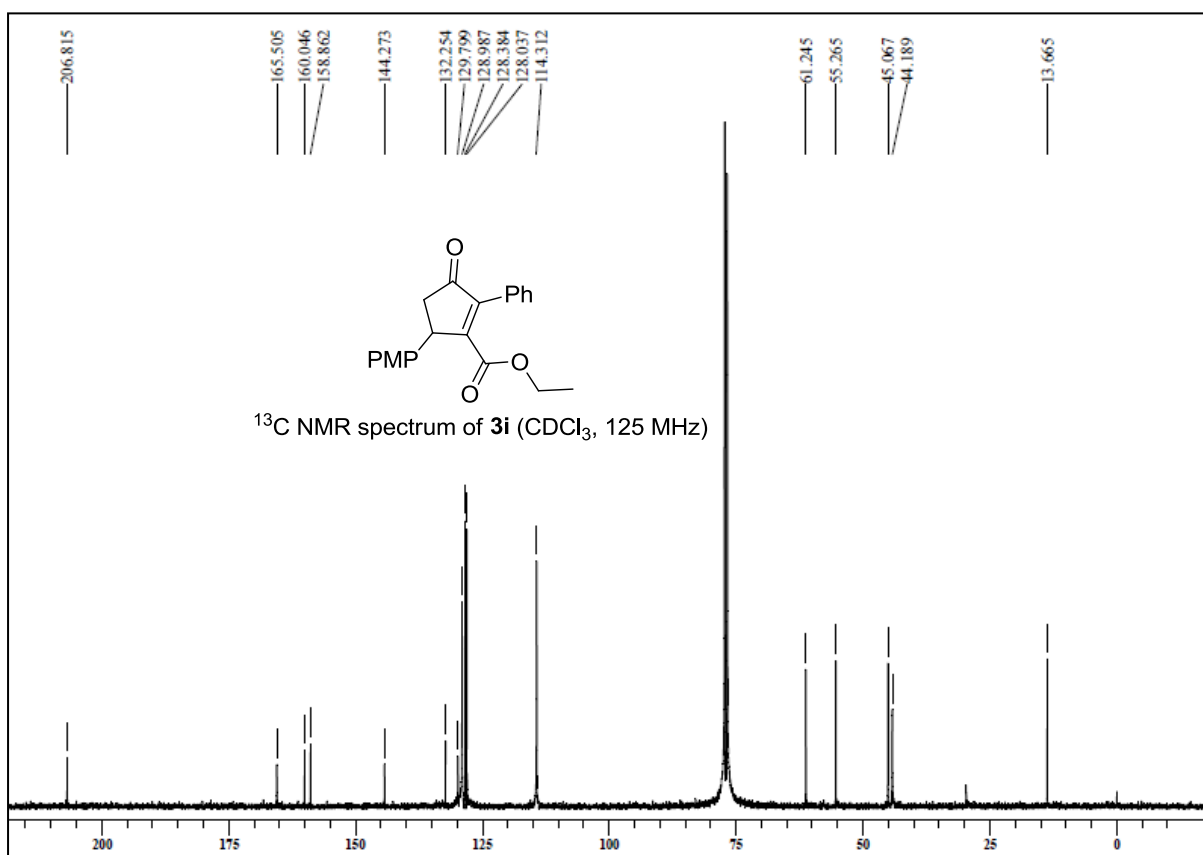

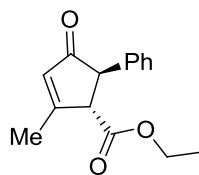

$^1\text{H}$  NMR spectrum of **2j** ( $\text{CDCl}_3$ , 300 MHz)

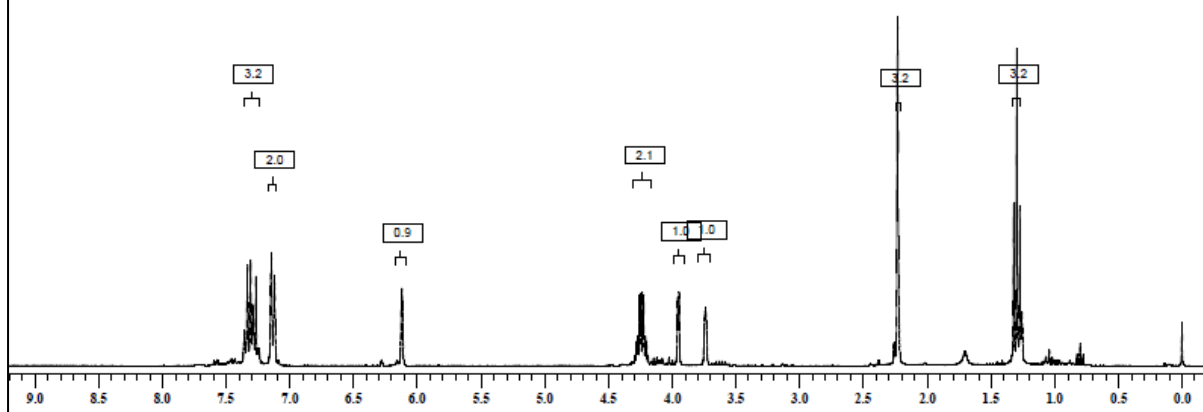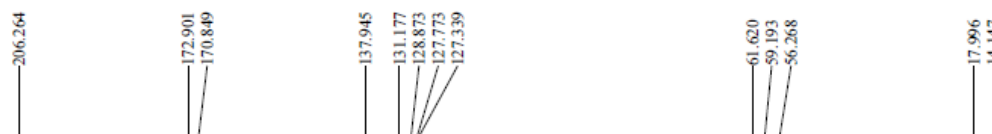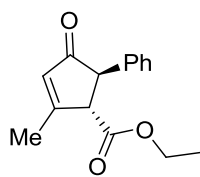

$^{13}\text{C}$  NMR spectrum of **2j** ( $\text{CDCl}_3$ , 125 MHz)

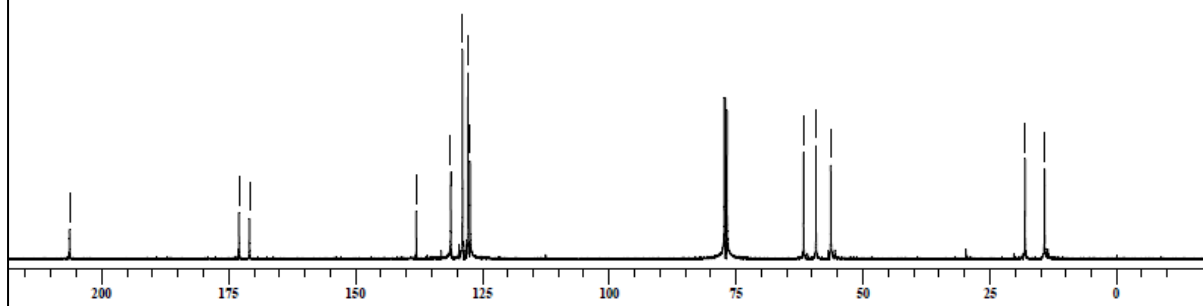



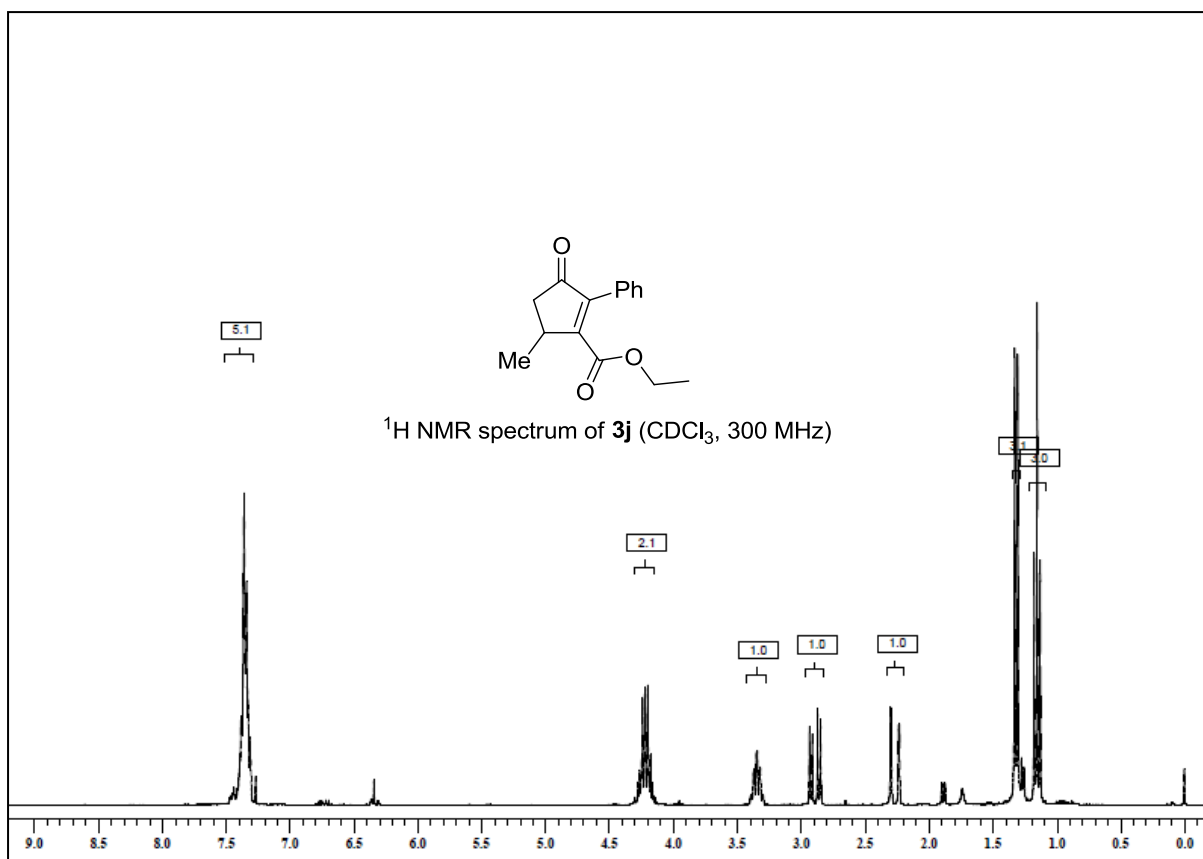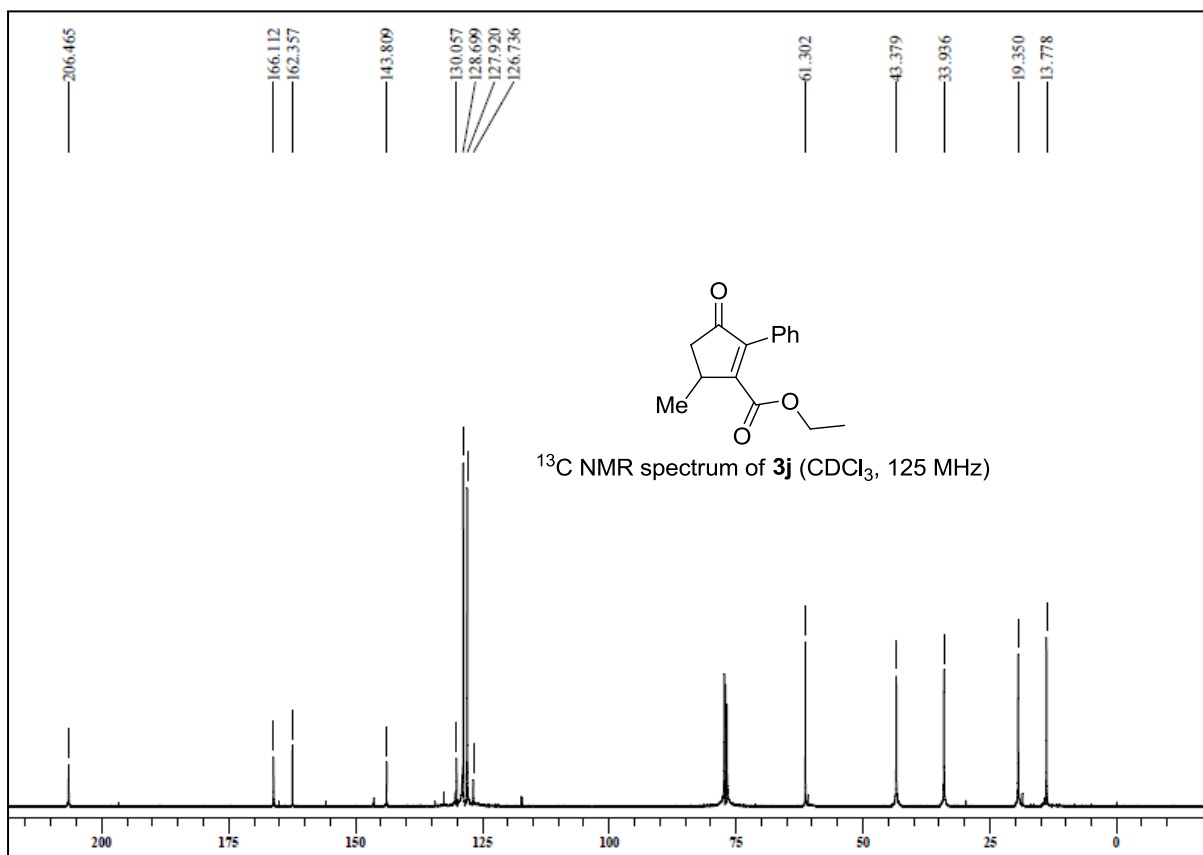

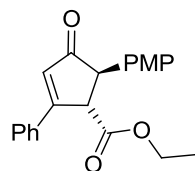

$^1\text{H}$  NMR spectrum of **2k** ( $\text{CDCl}_3$ , 500 MHz)

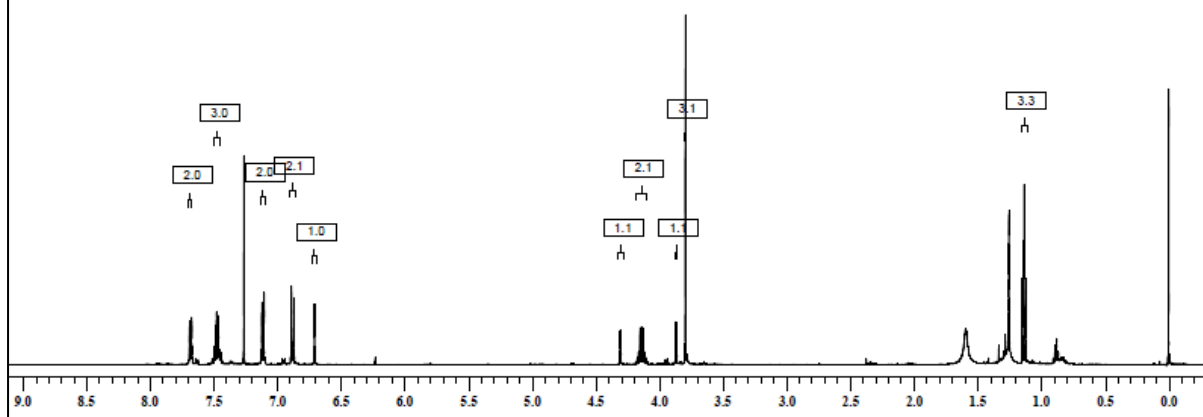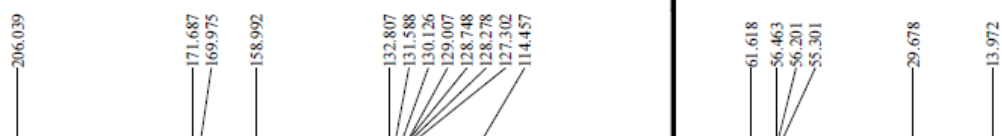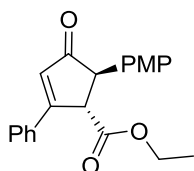

$^{13}\text{C}$  NMR spectrum of **2k** ( $\text{CDCl}_3$ , 125 MHz)

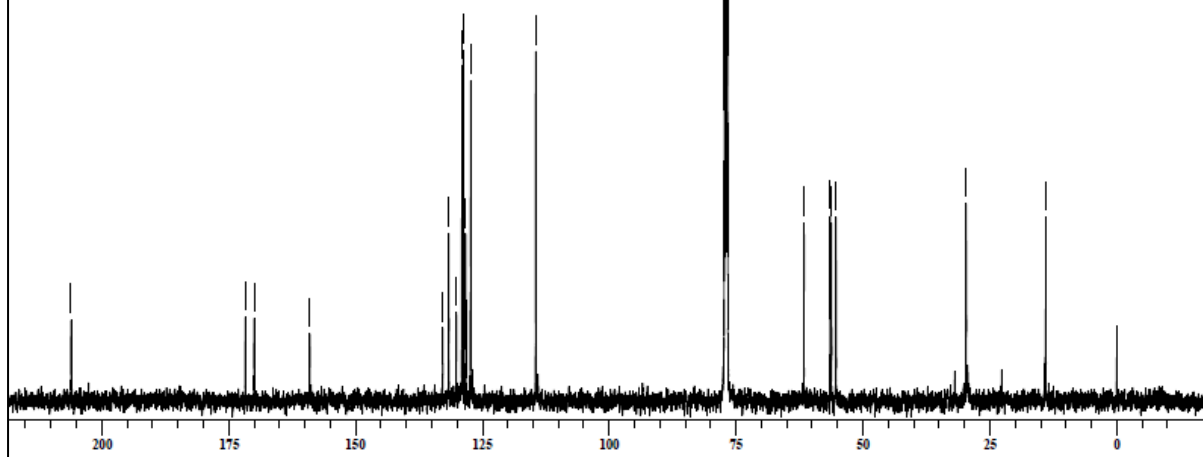

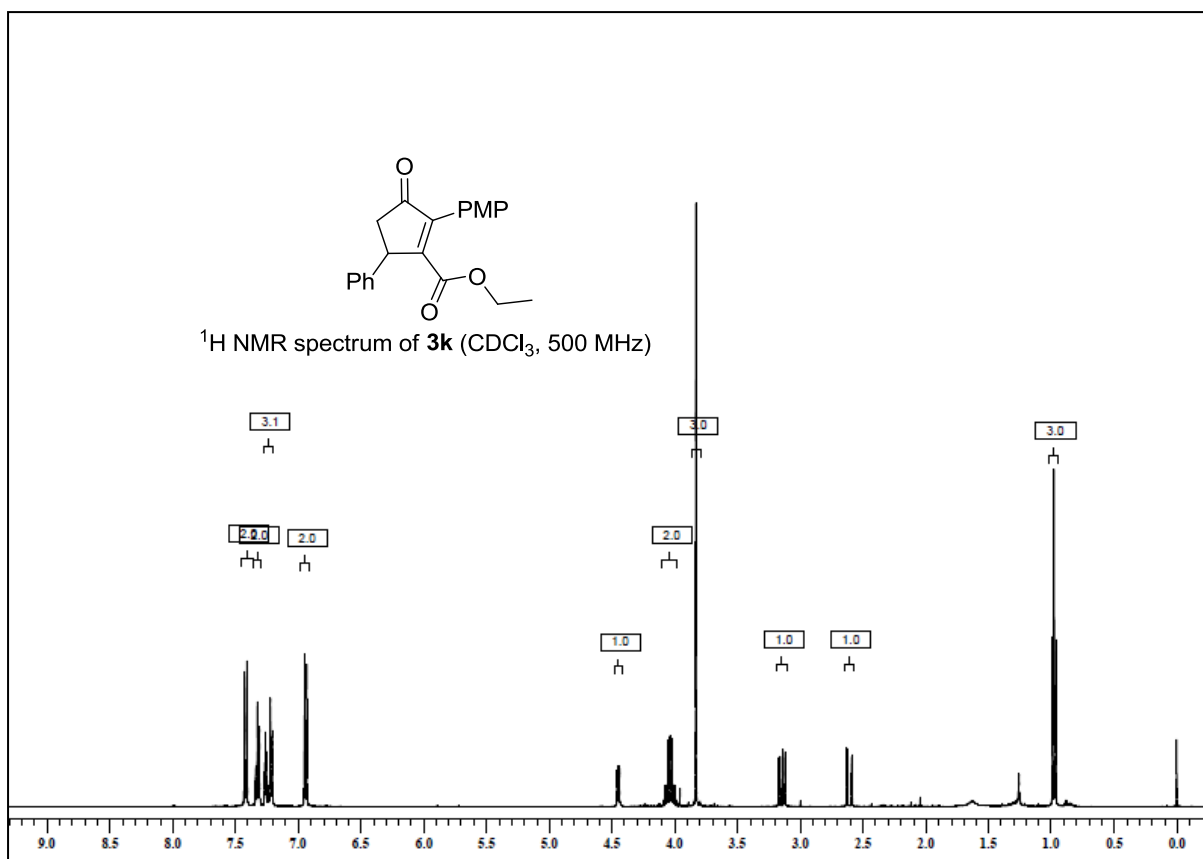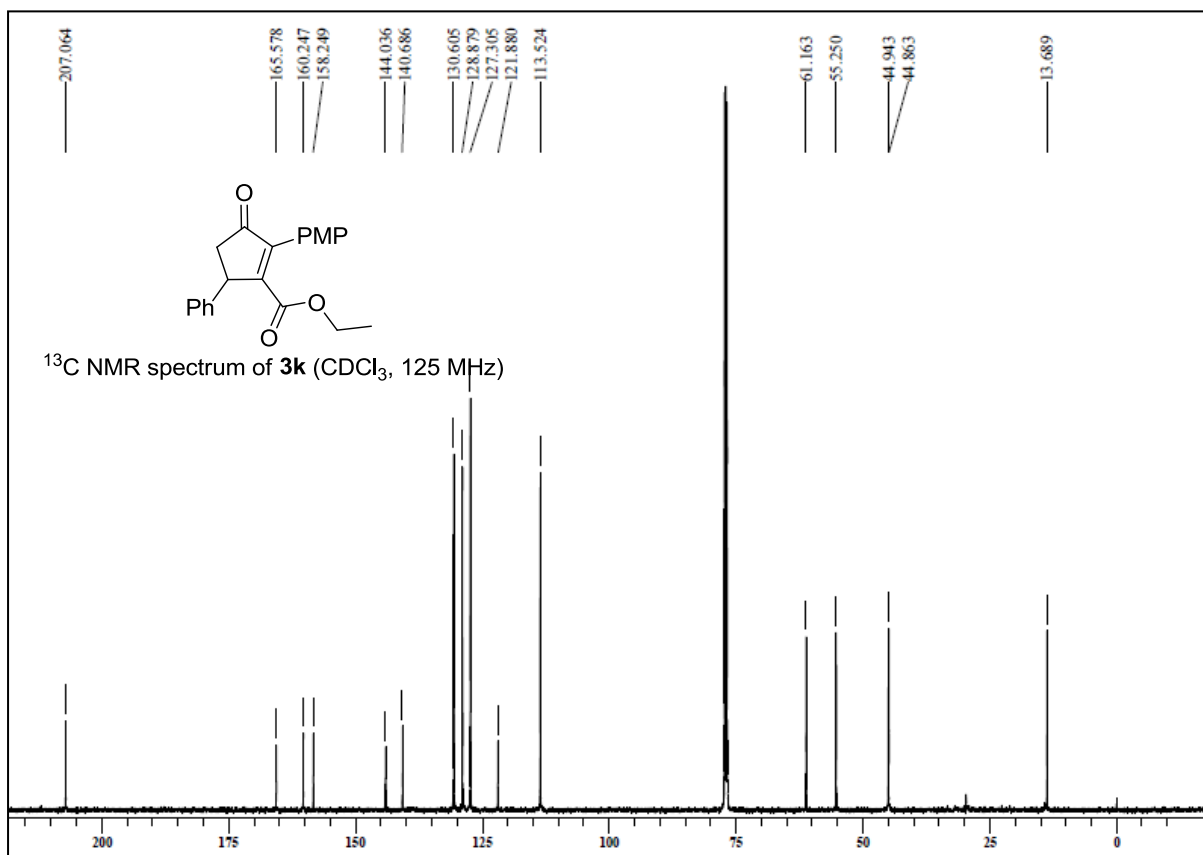

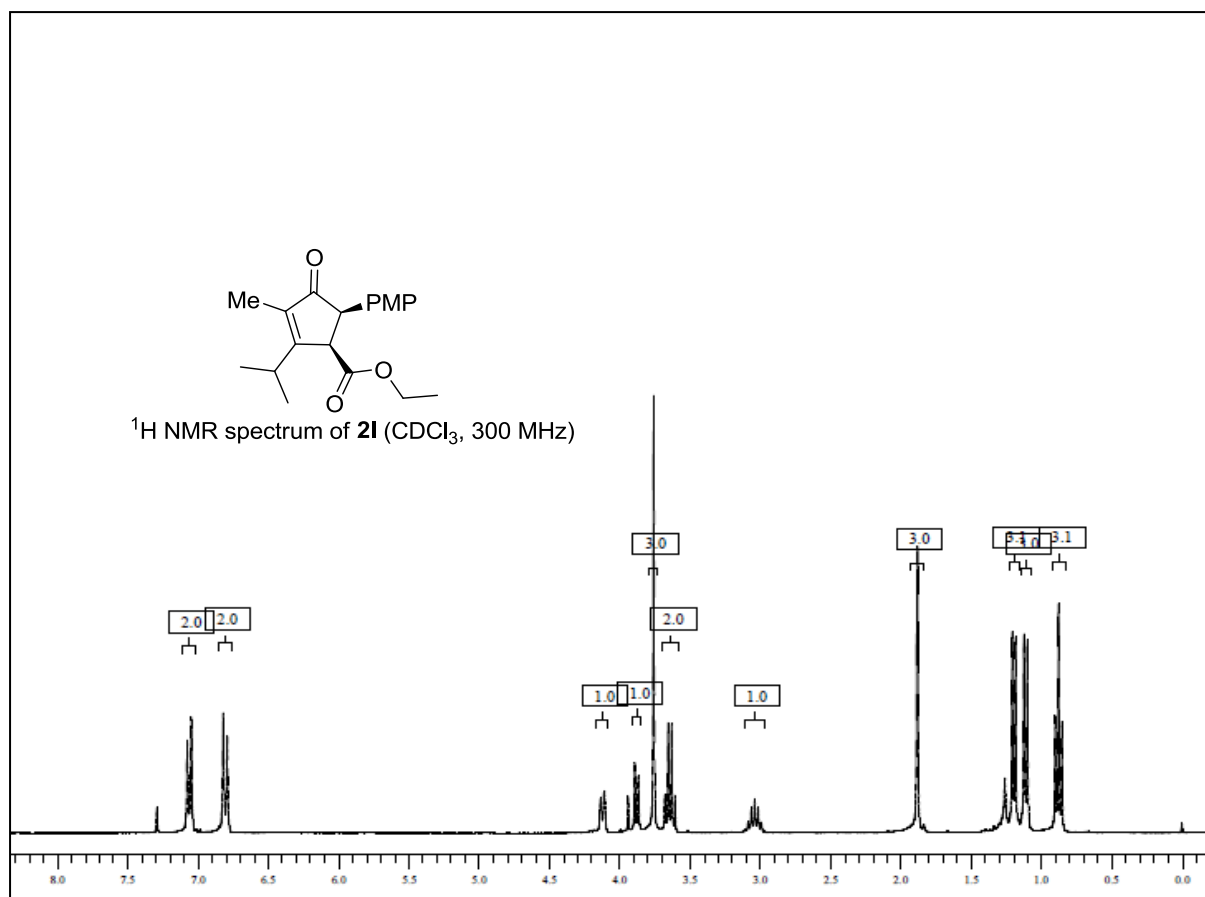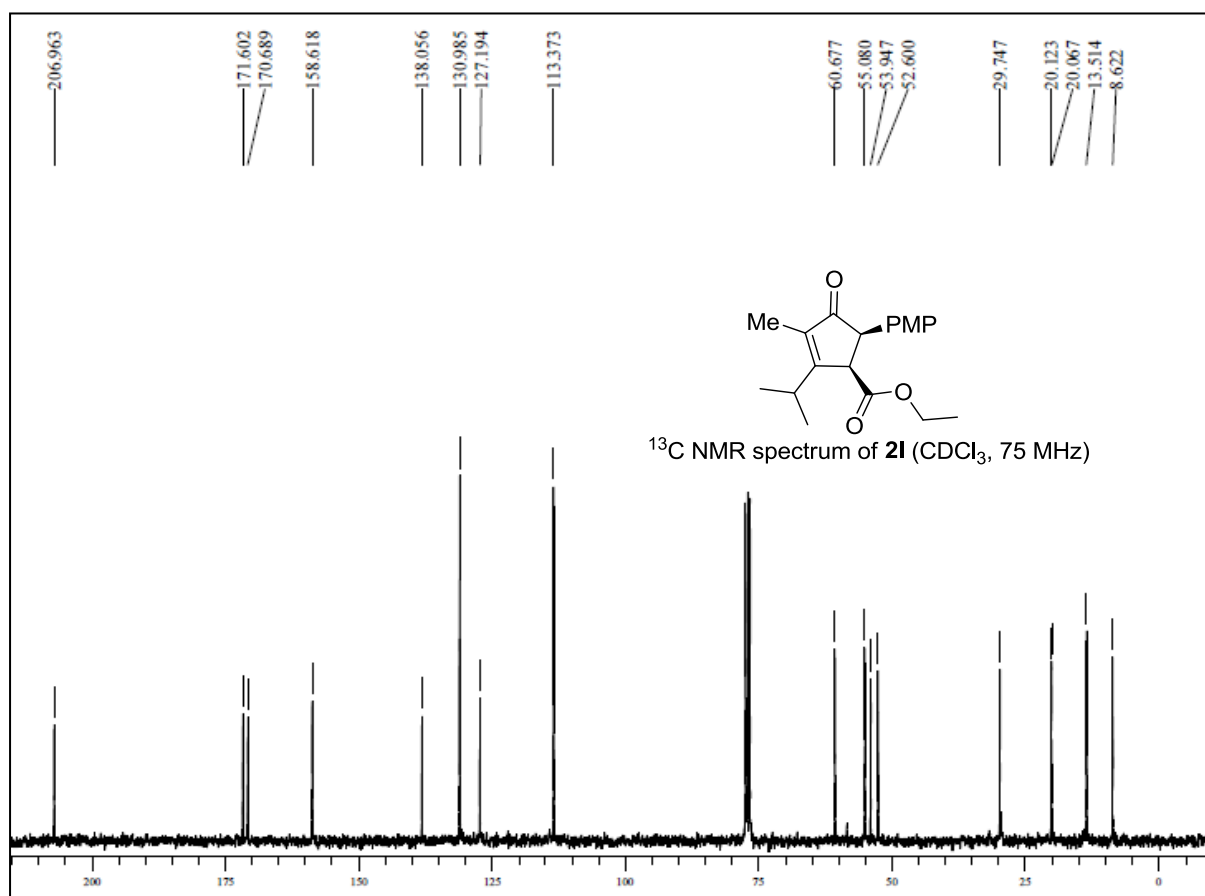

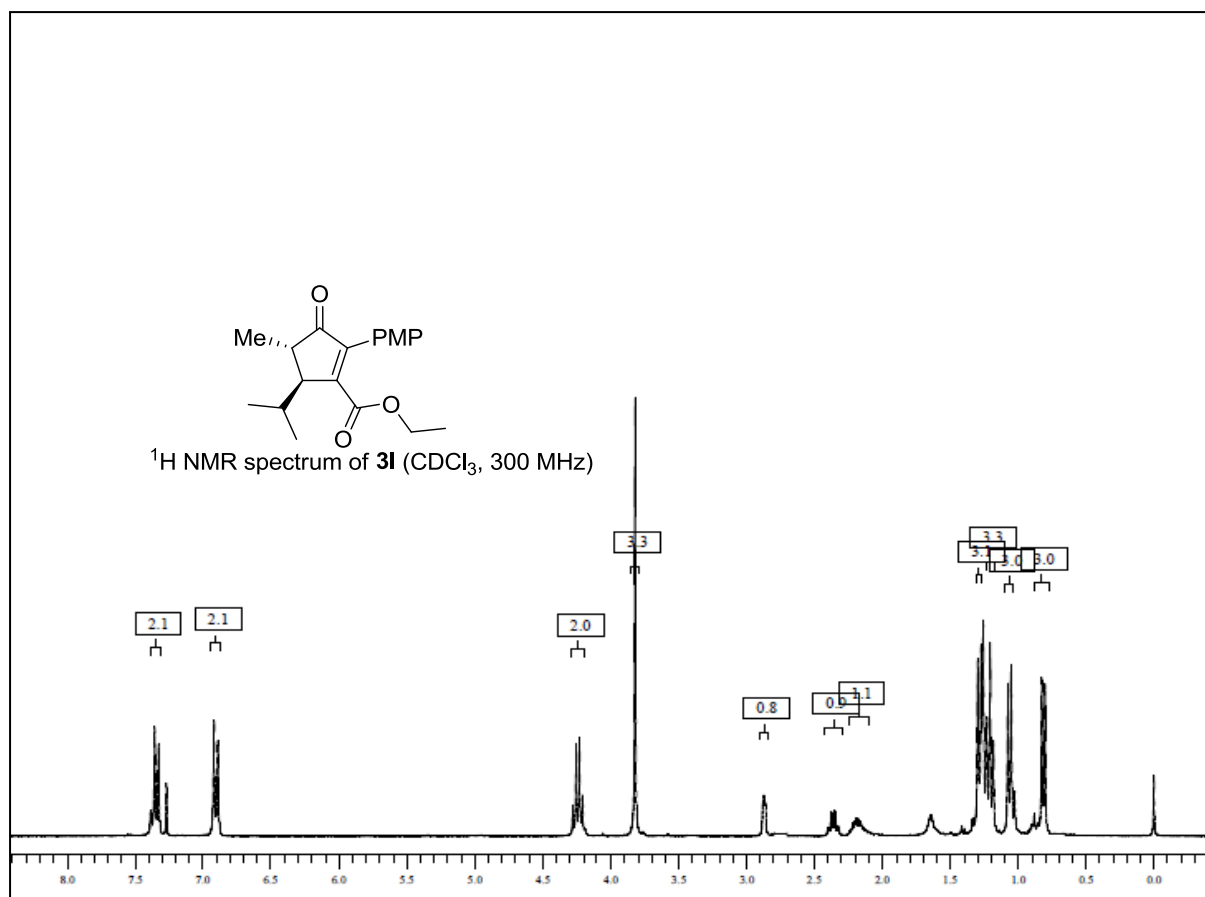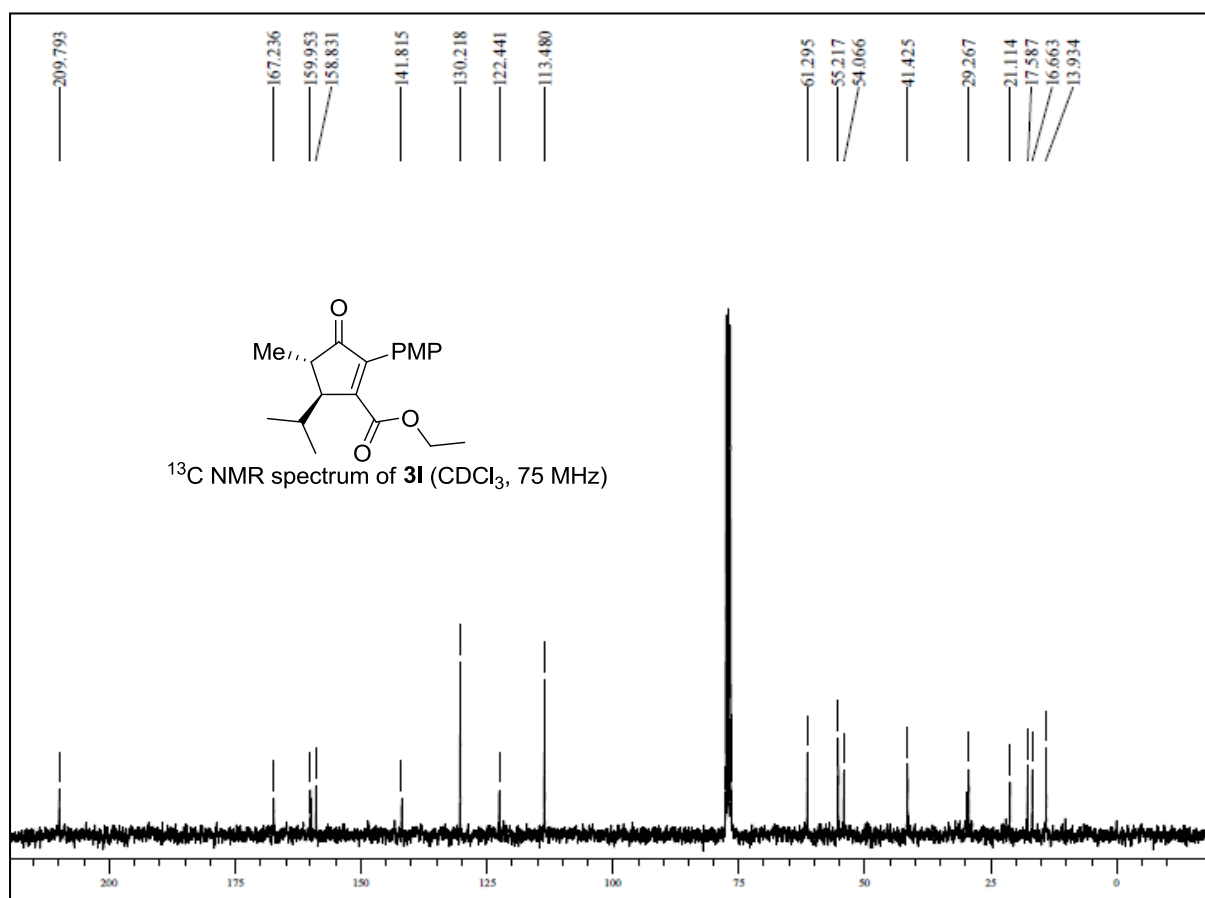

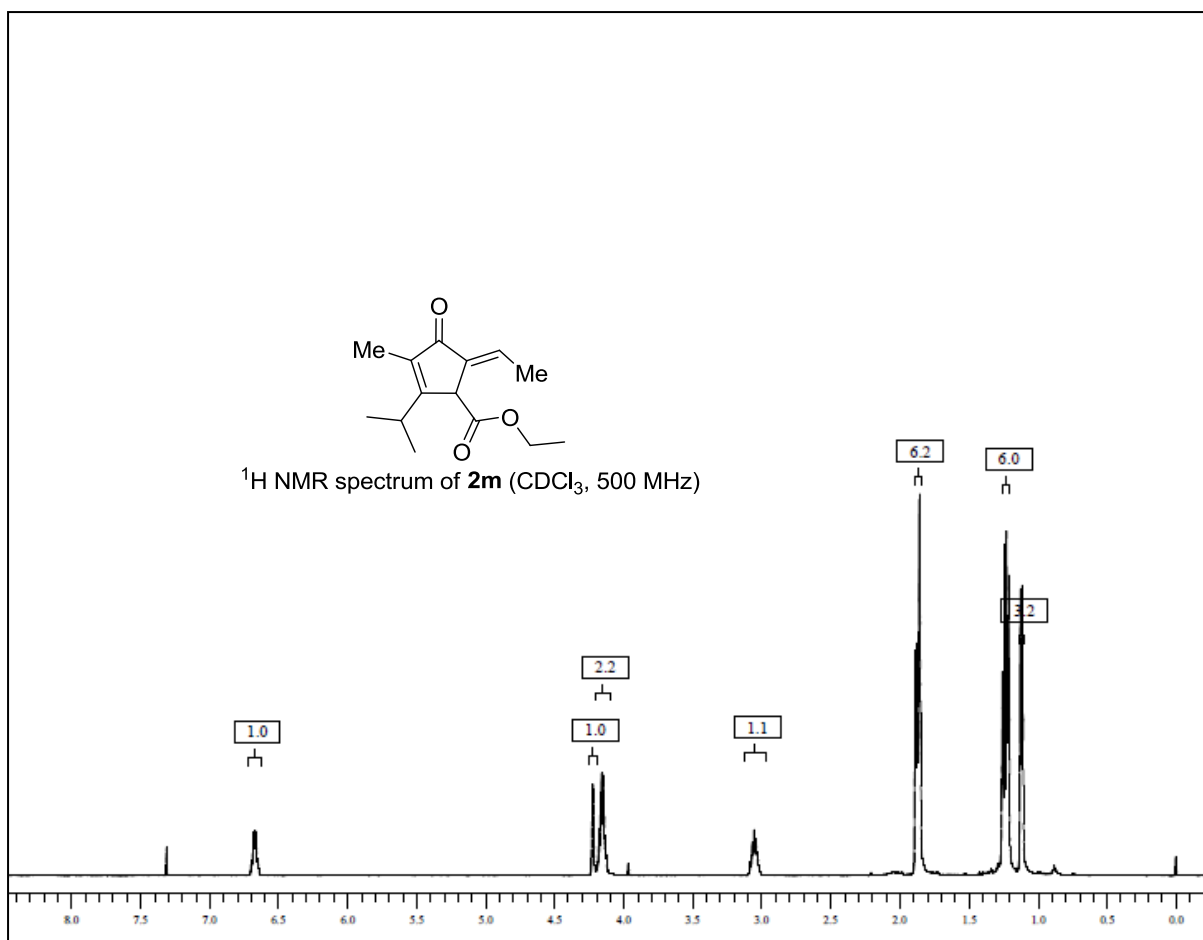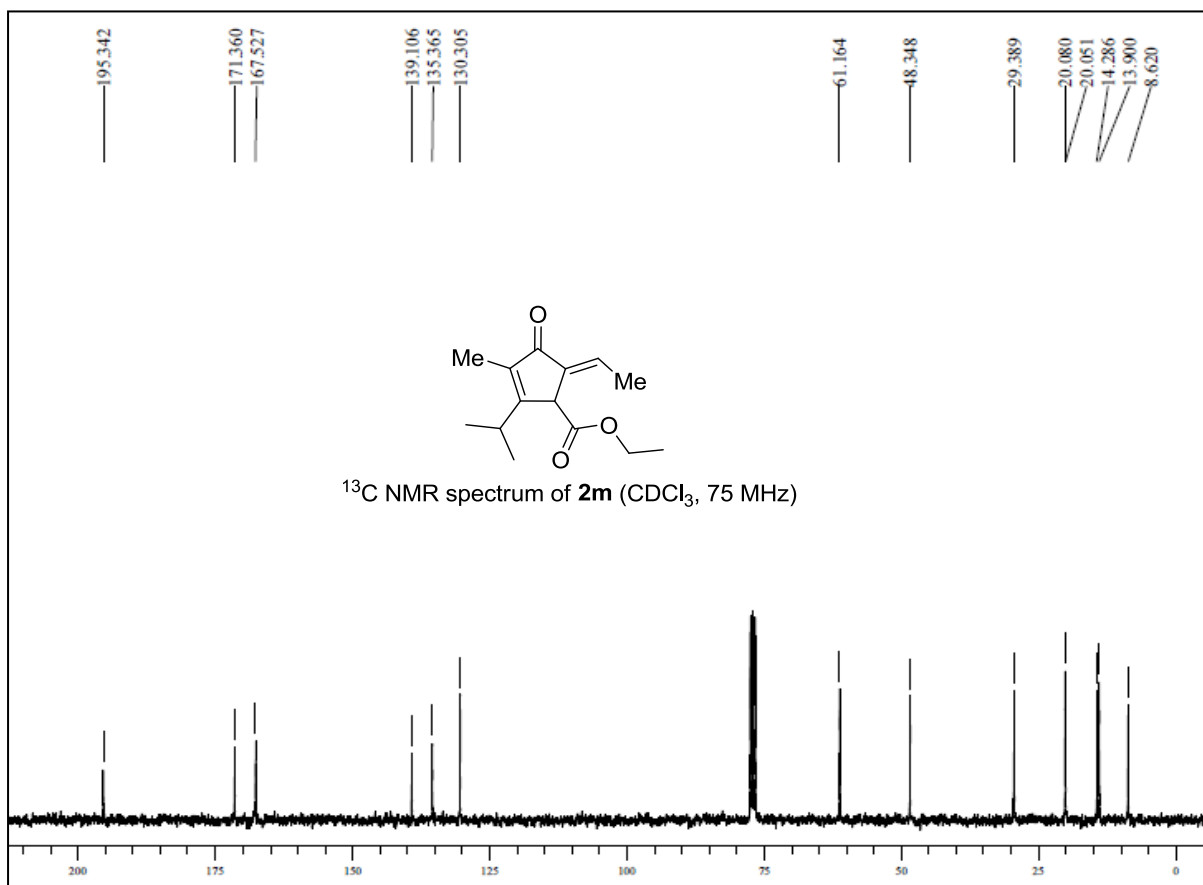

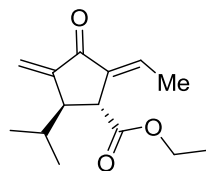

<sup>1</sup>H NMR spectrum of **2'm** (CDCl<sub>3</sub>, 300 MHz)

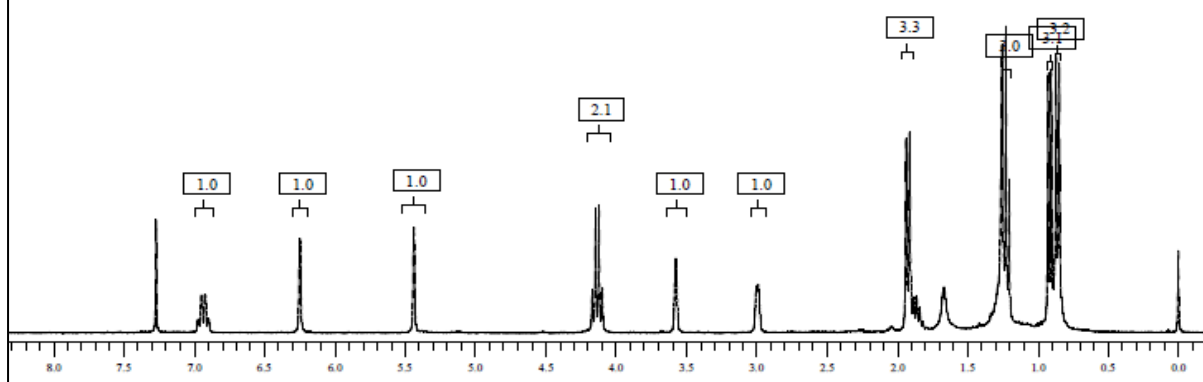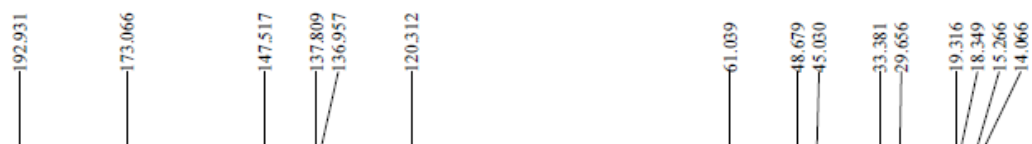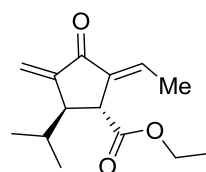

<sup>13</sup>C NMR spectrum of **2'm** (CDCl<sub>3</sub>, 125 MHz)

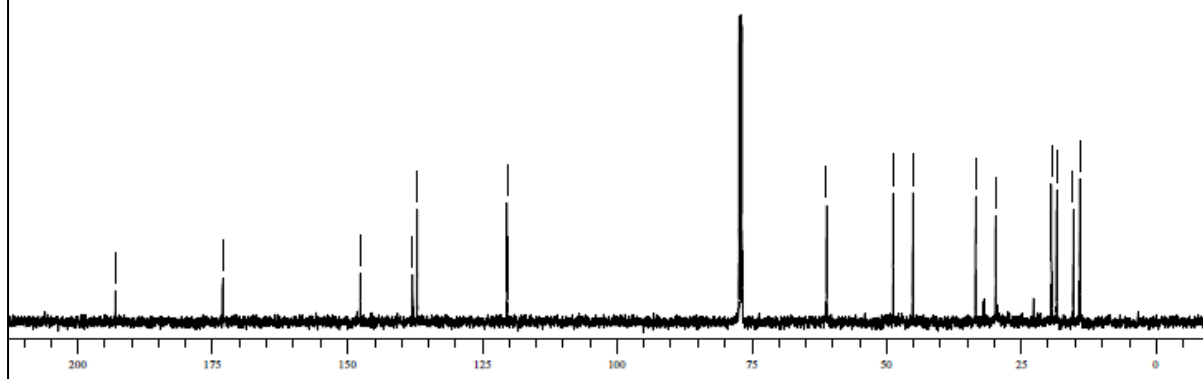

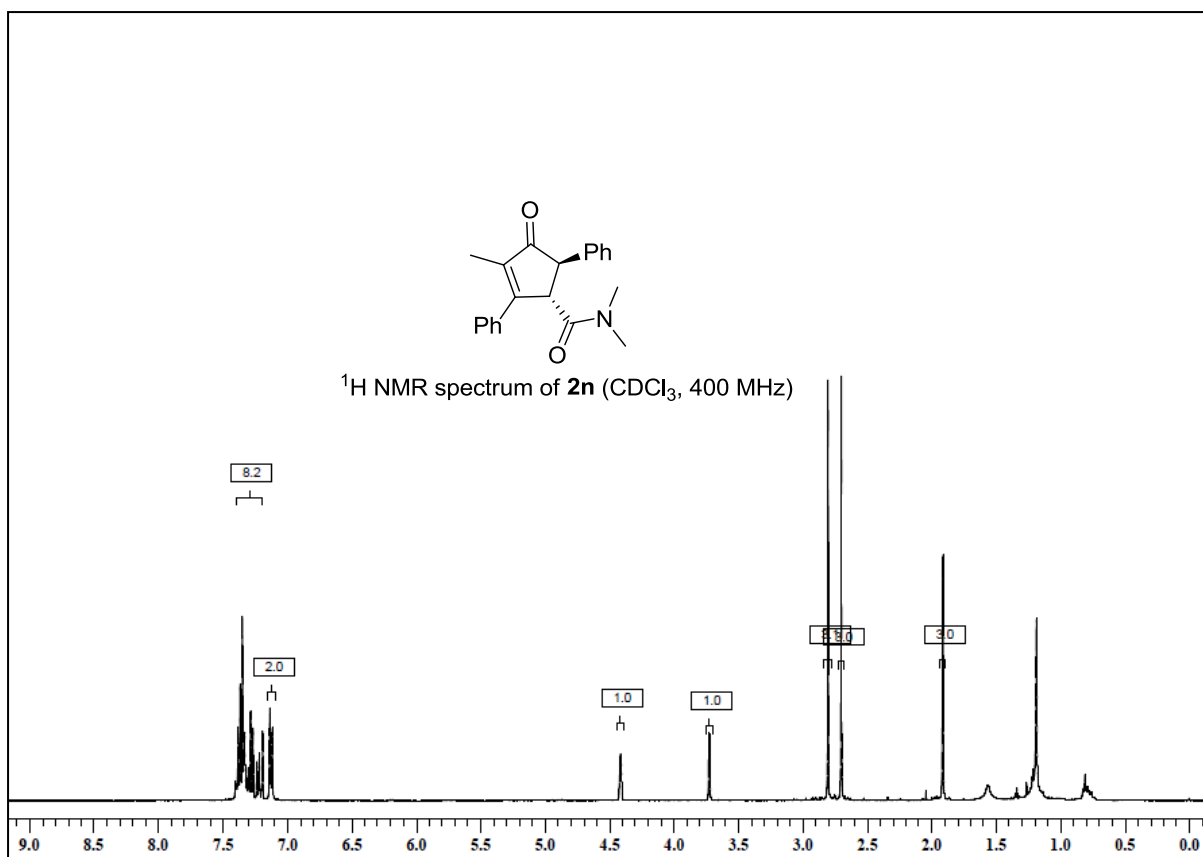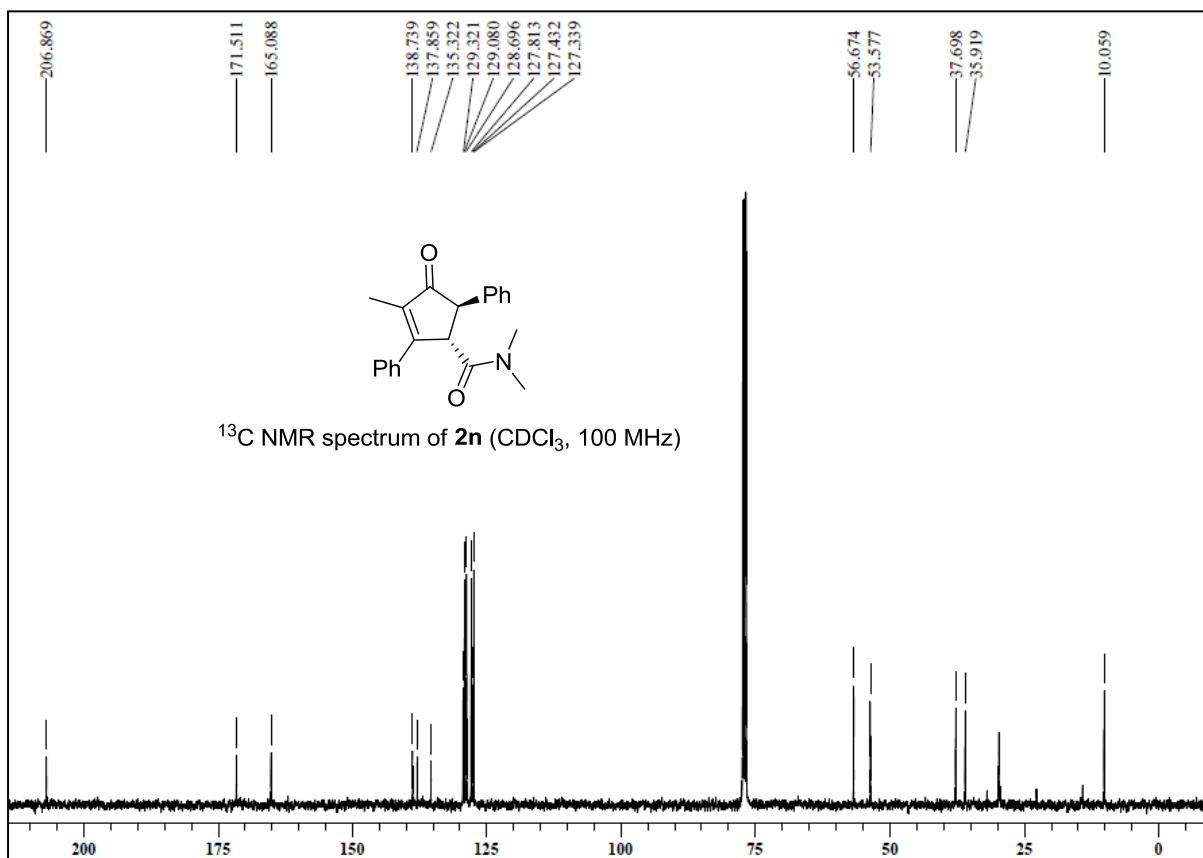



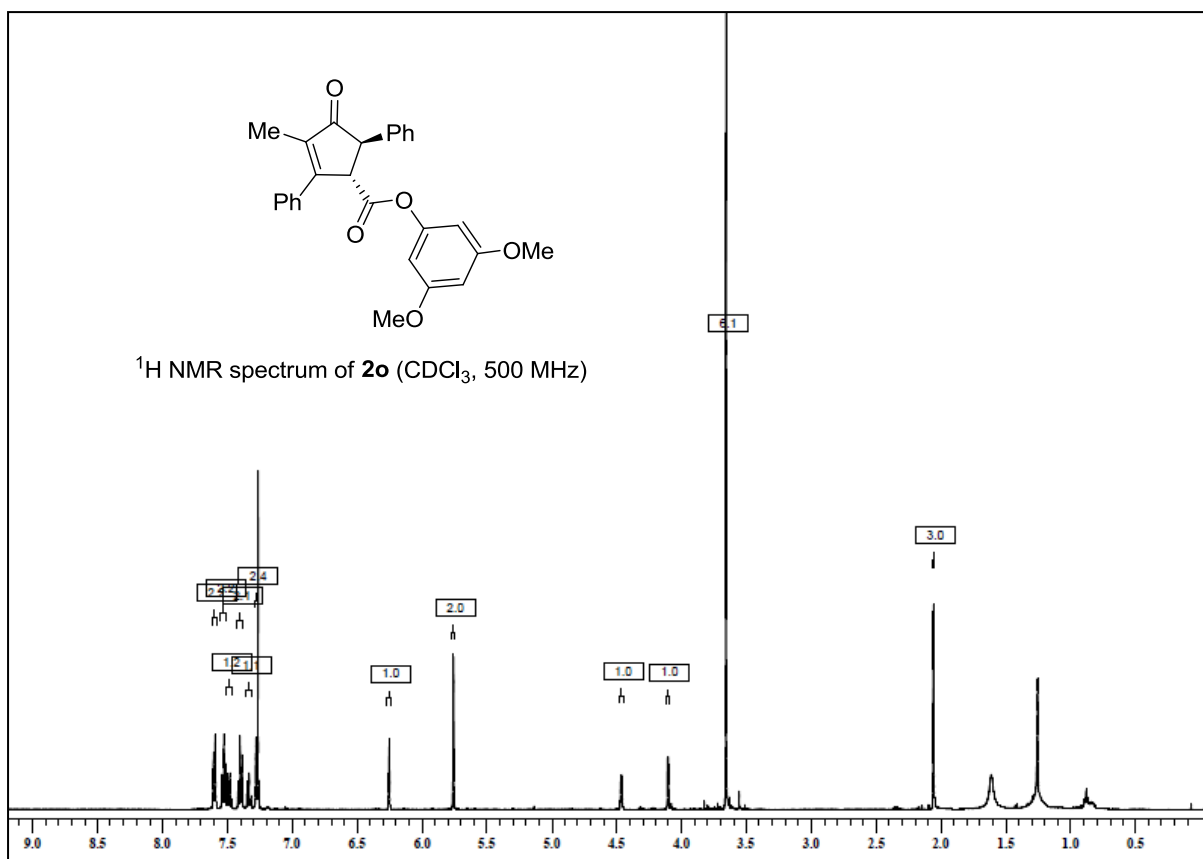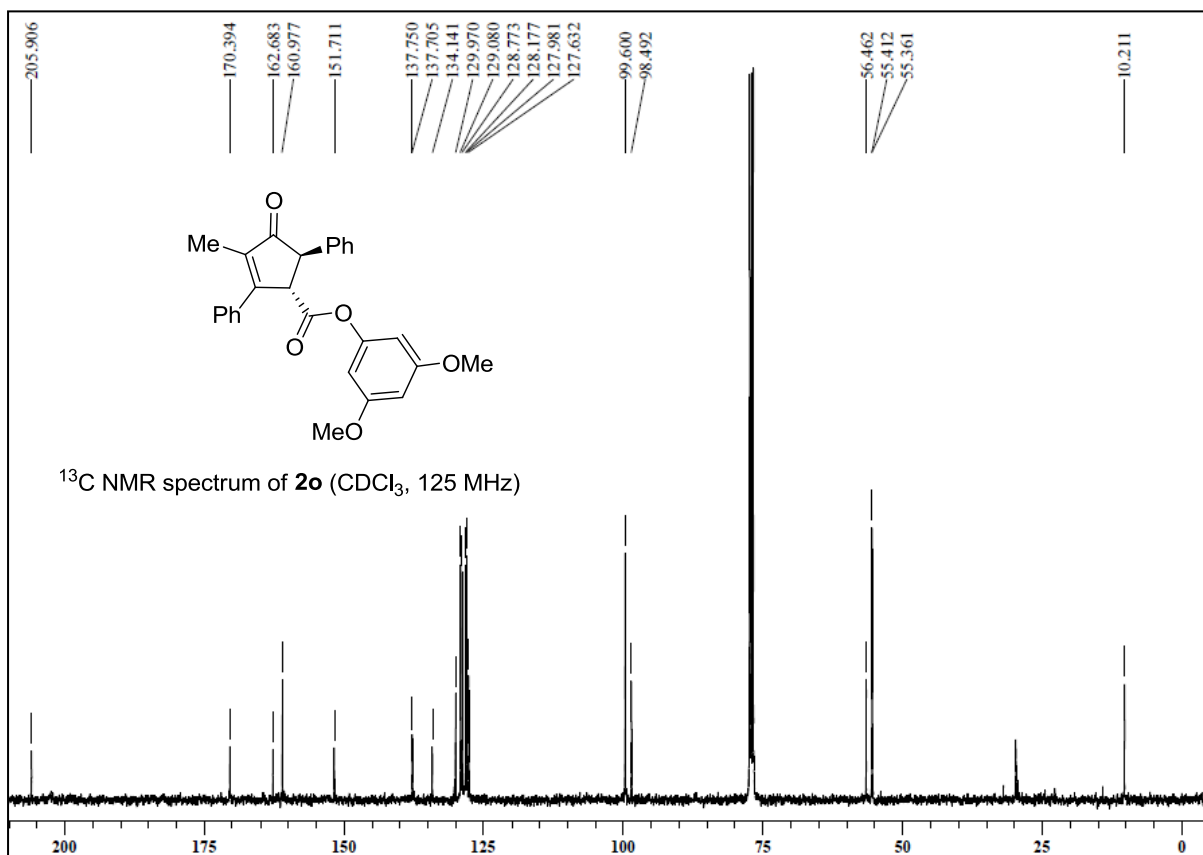

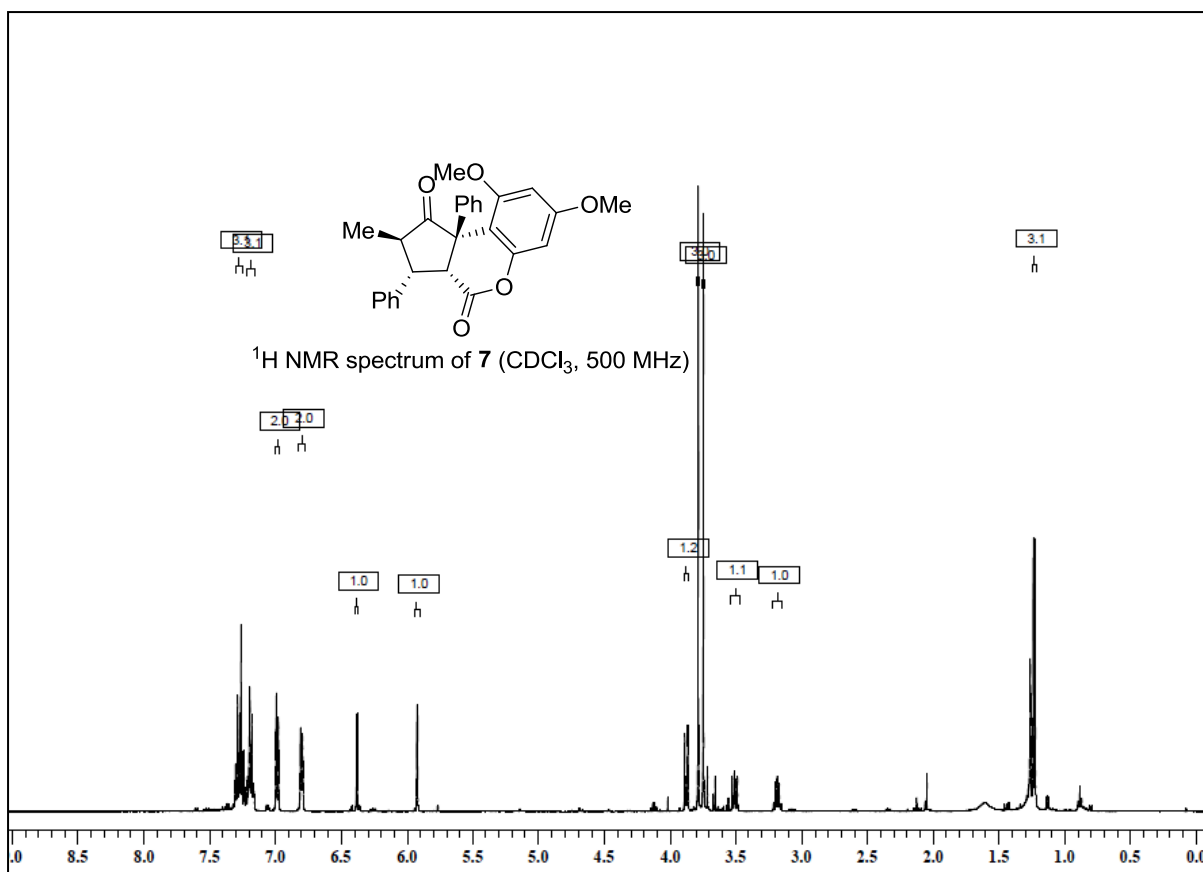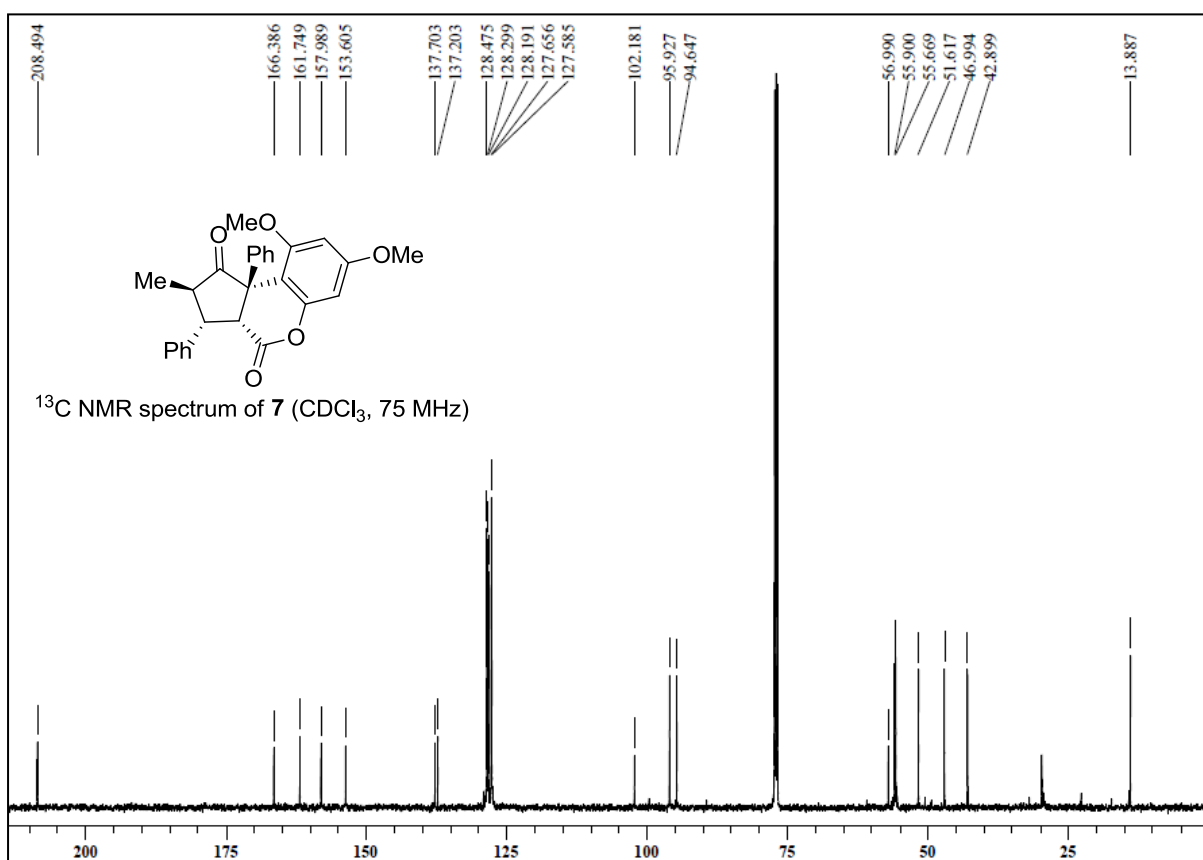

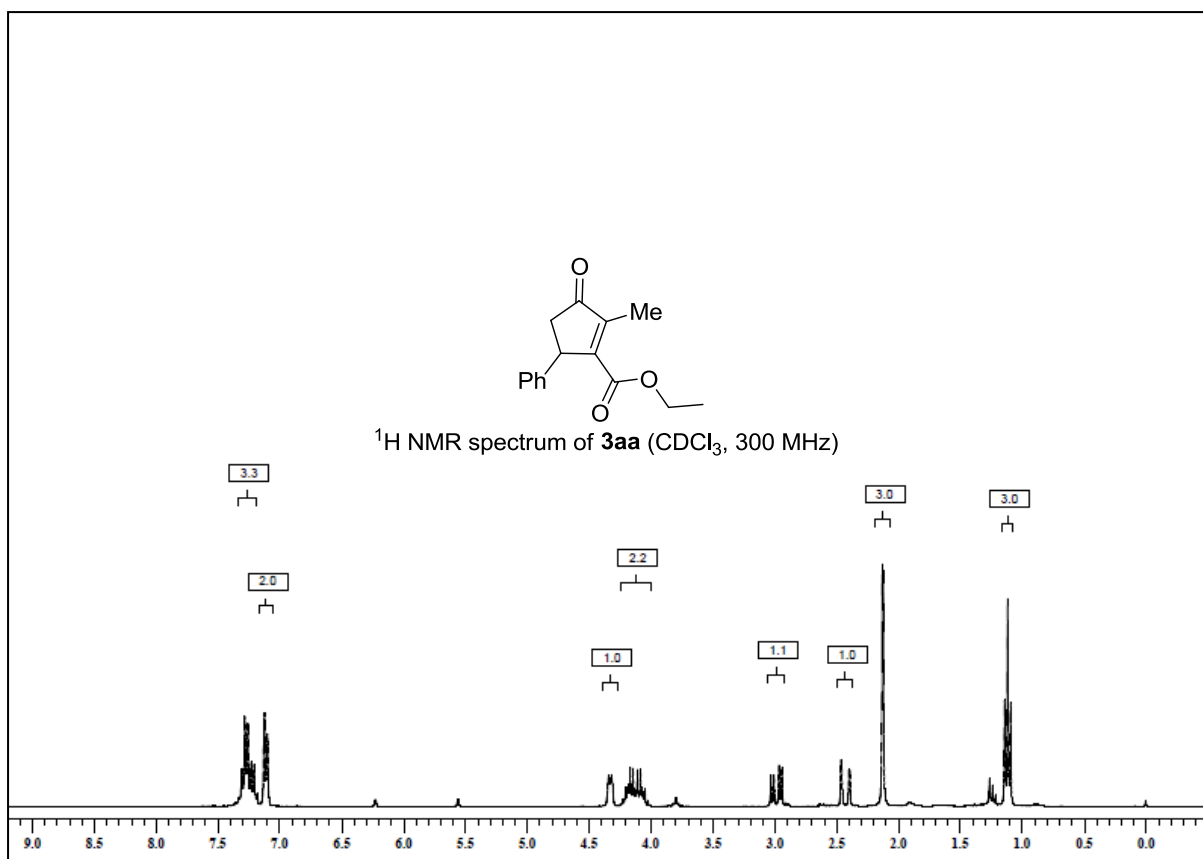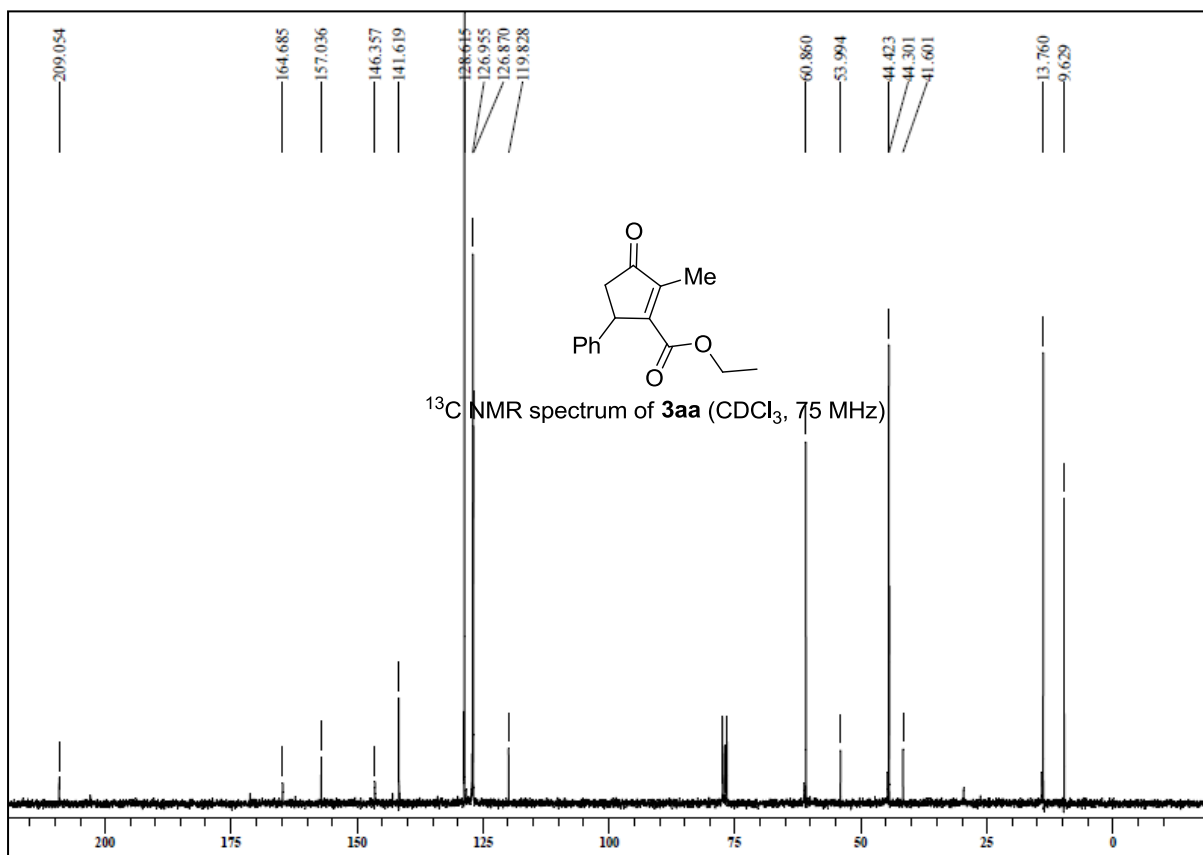

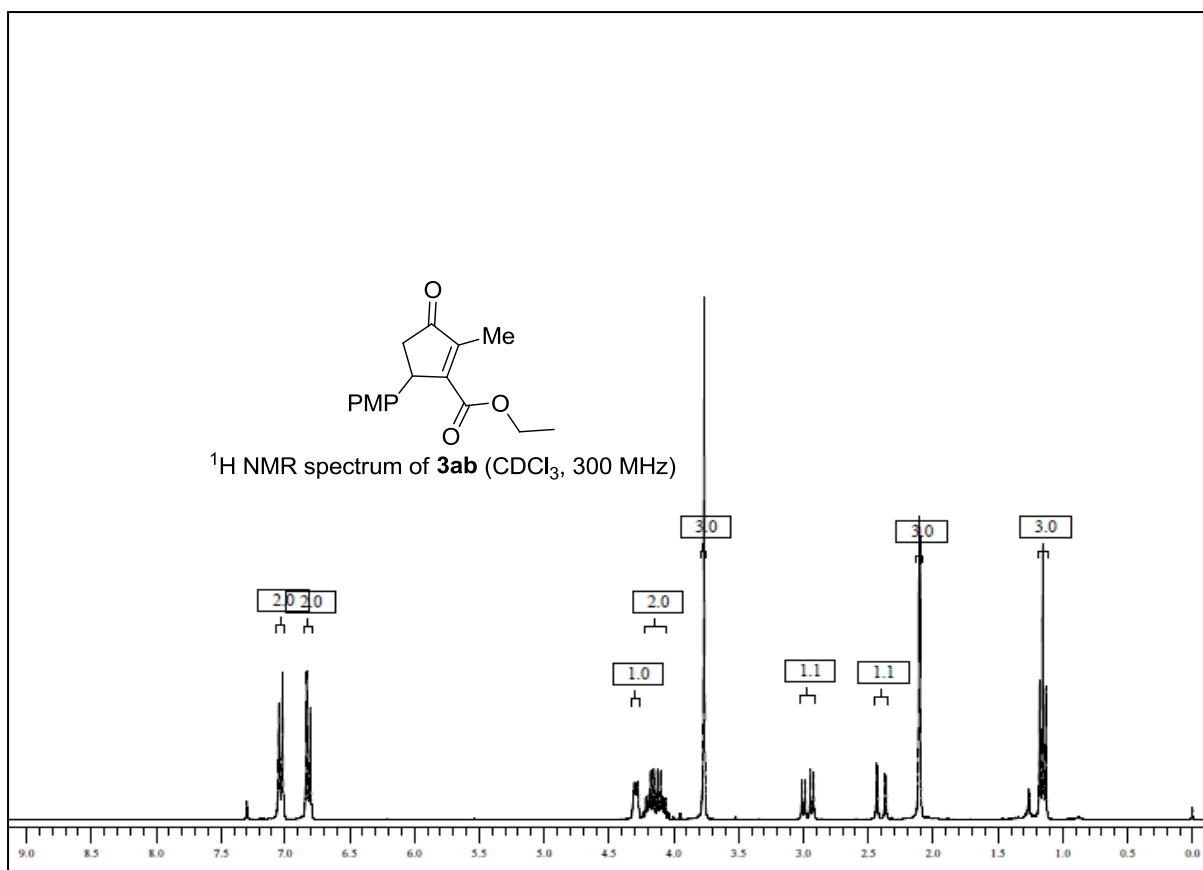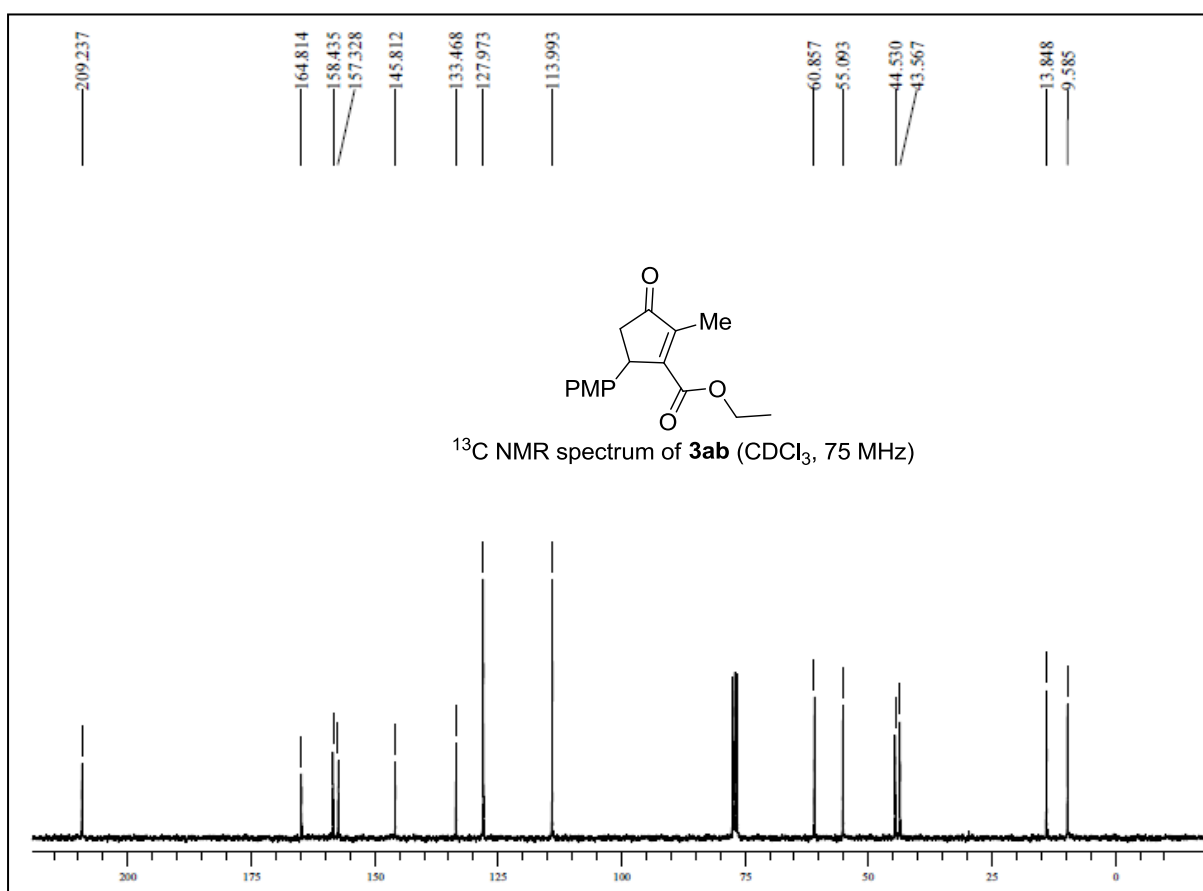

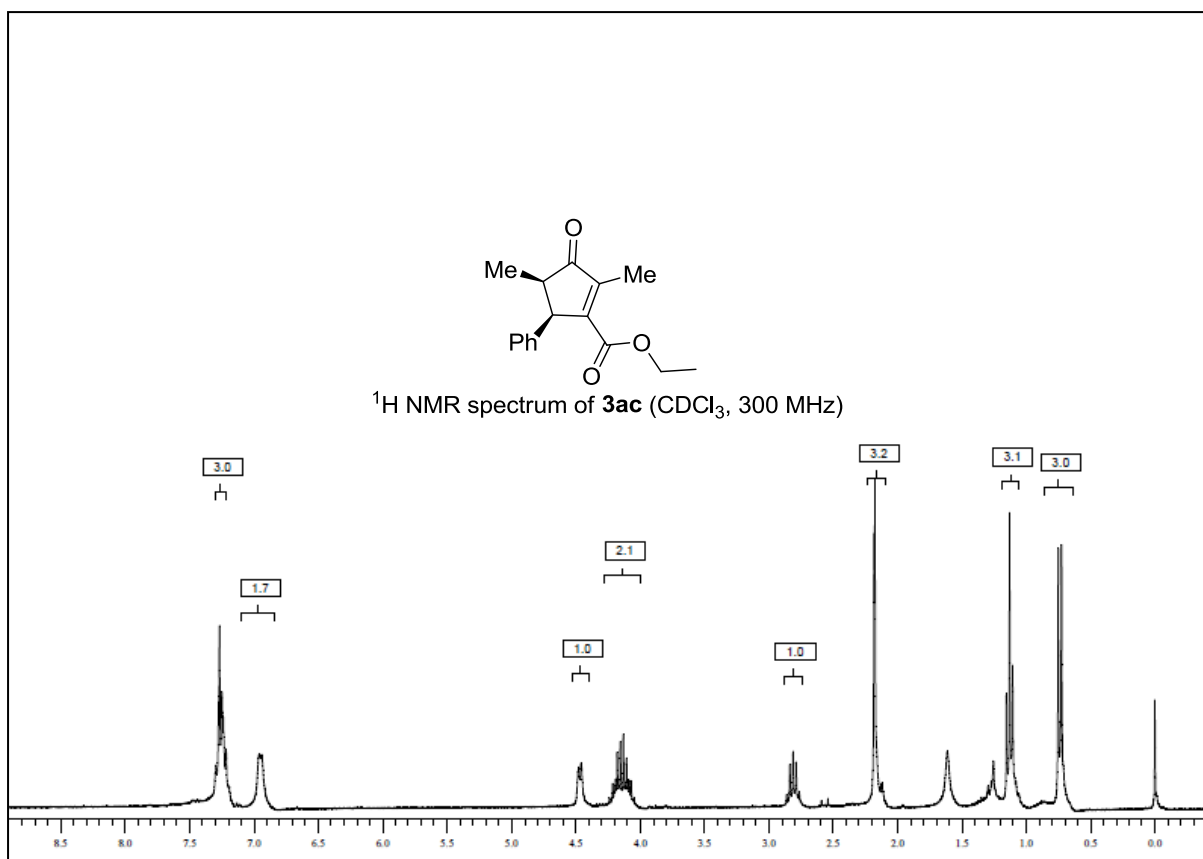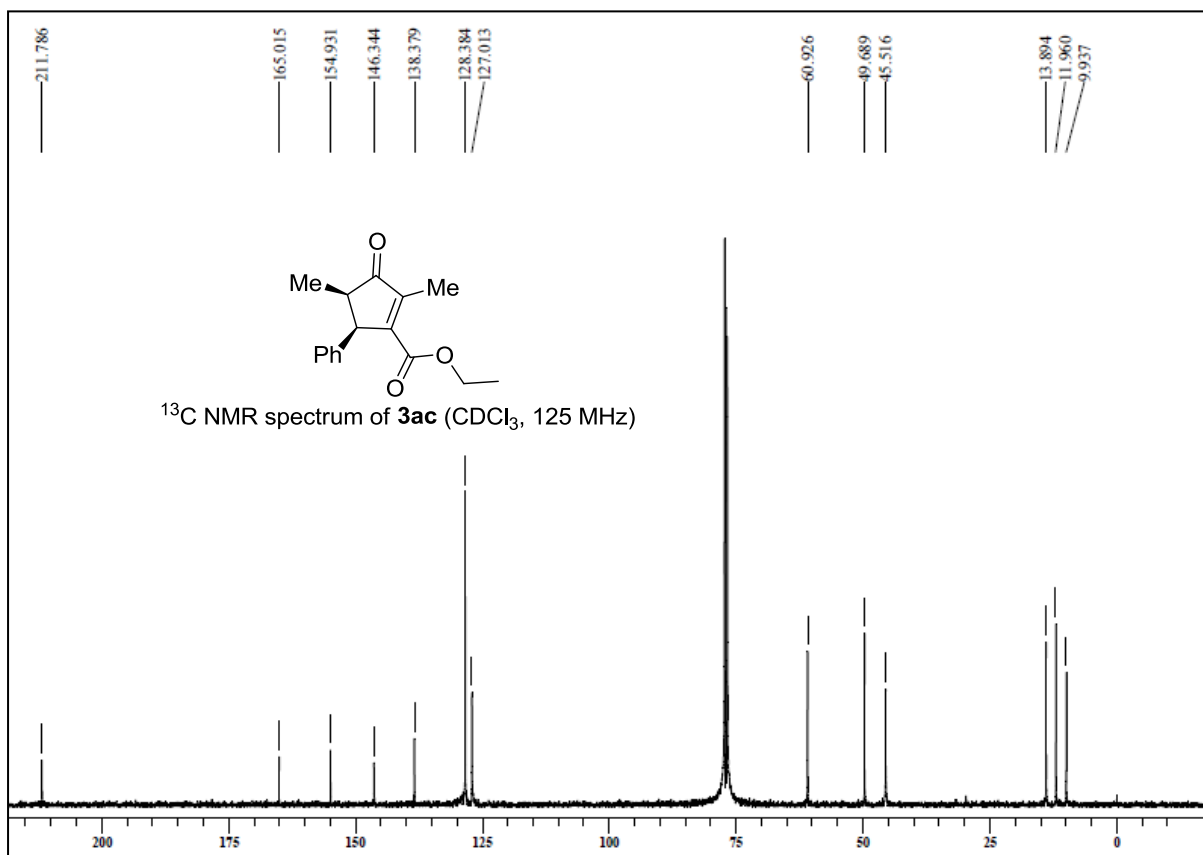

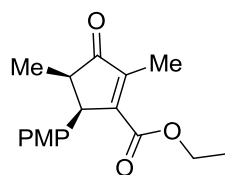

$^1\text{H}$  NMR spectrum of **3ad** ( $\text{CDCl}_3$ , 500 MHz)

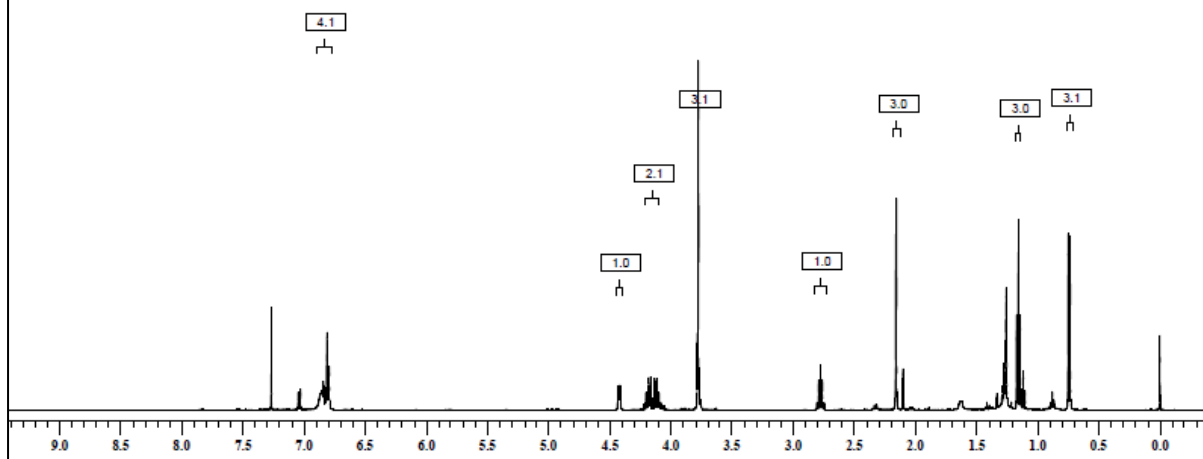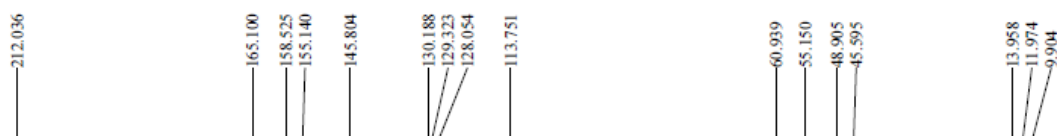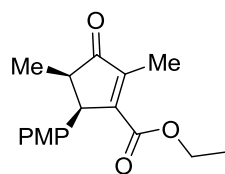

$^{13}\text{C}$  NMR spectrum of **3ad** ( $\text{CDCl}_3$ , 75 MHz)

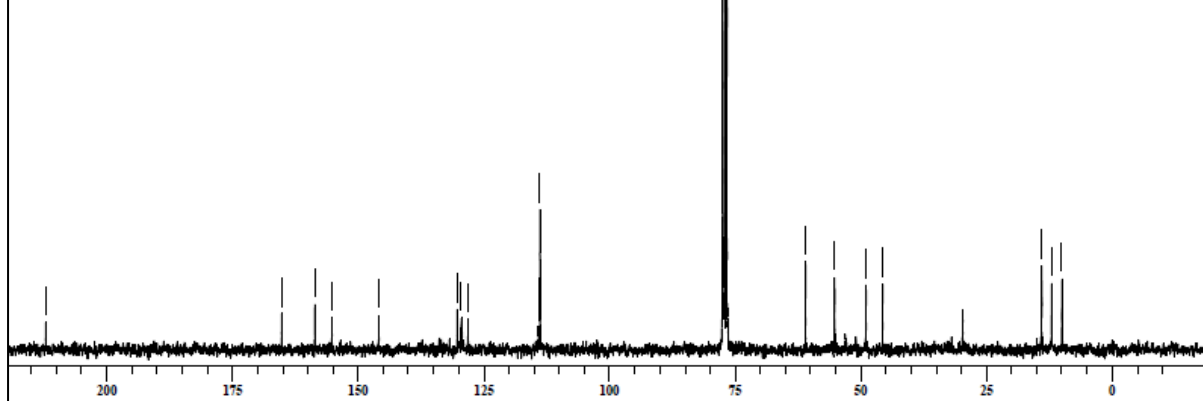

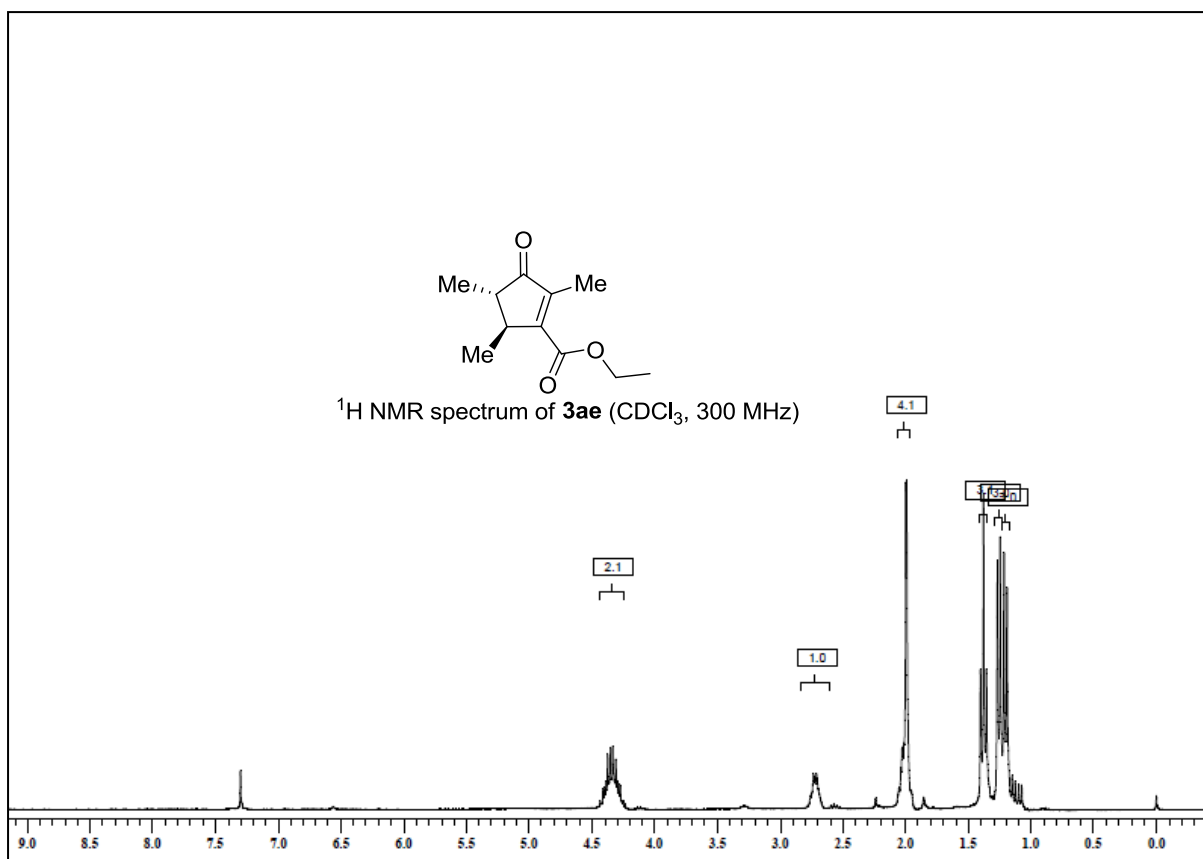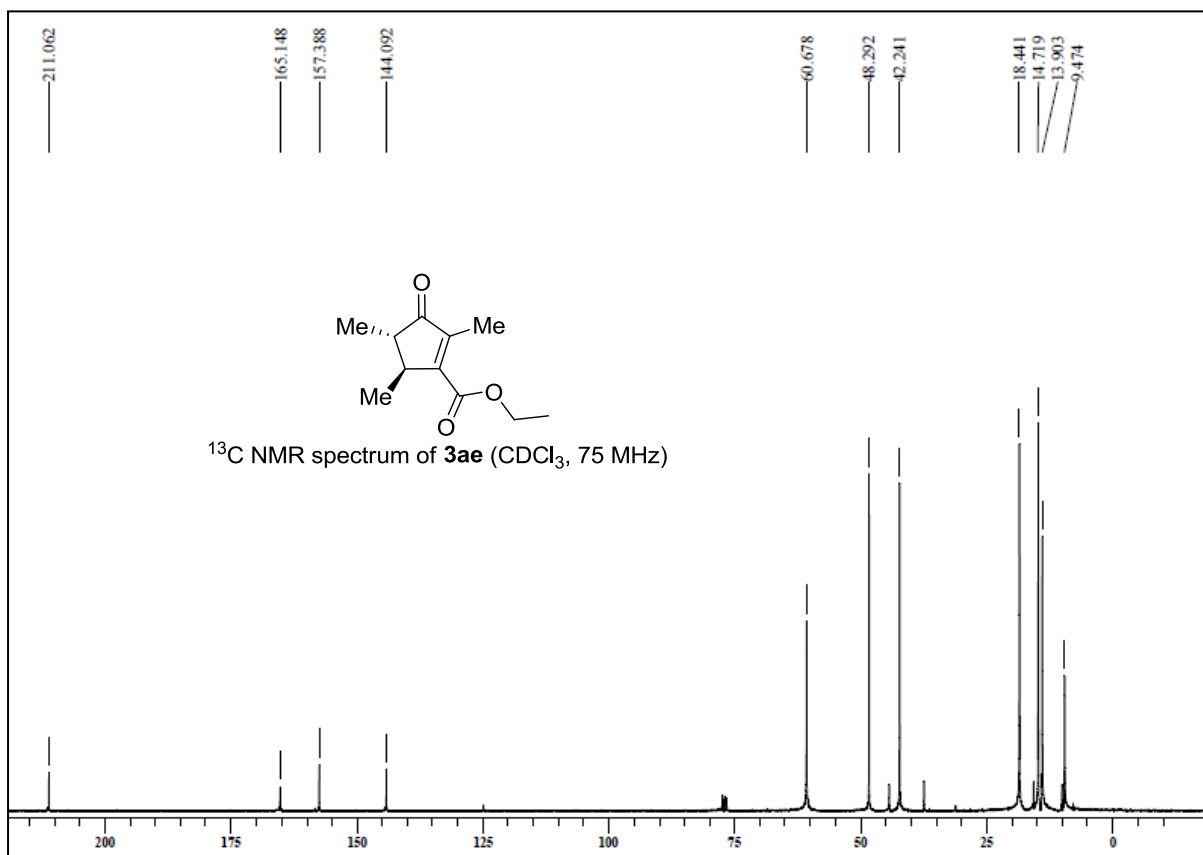

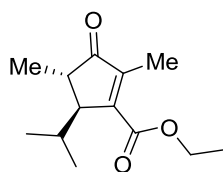

$^1\text{H}$  NMR spectrum of **3af** ( $\text{CDCl}_3$ , 300 MHz)

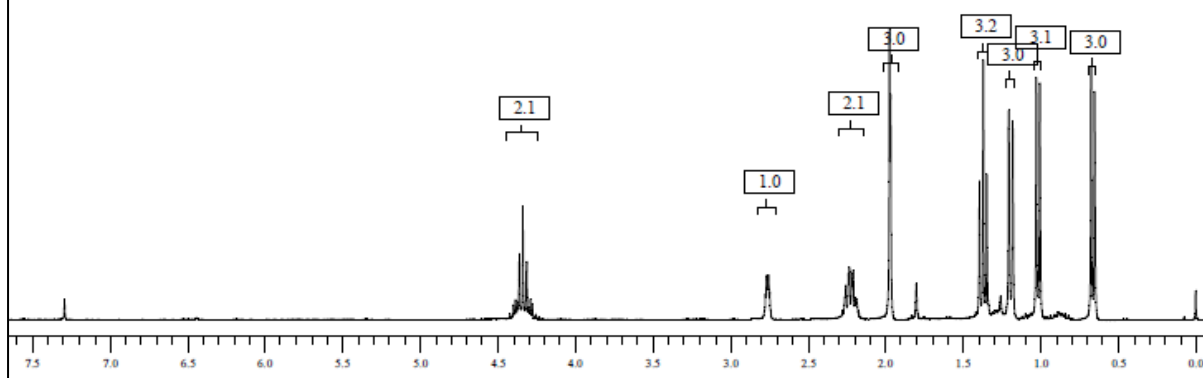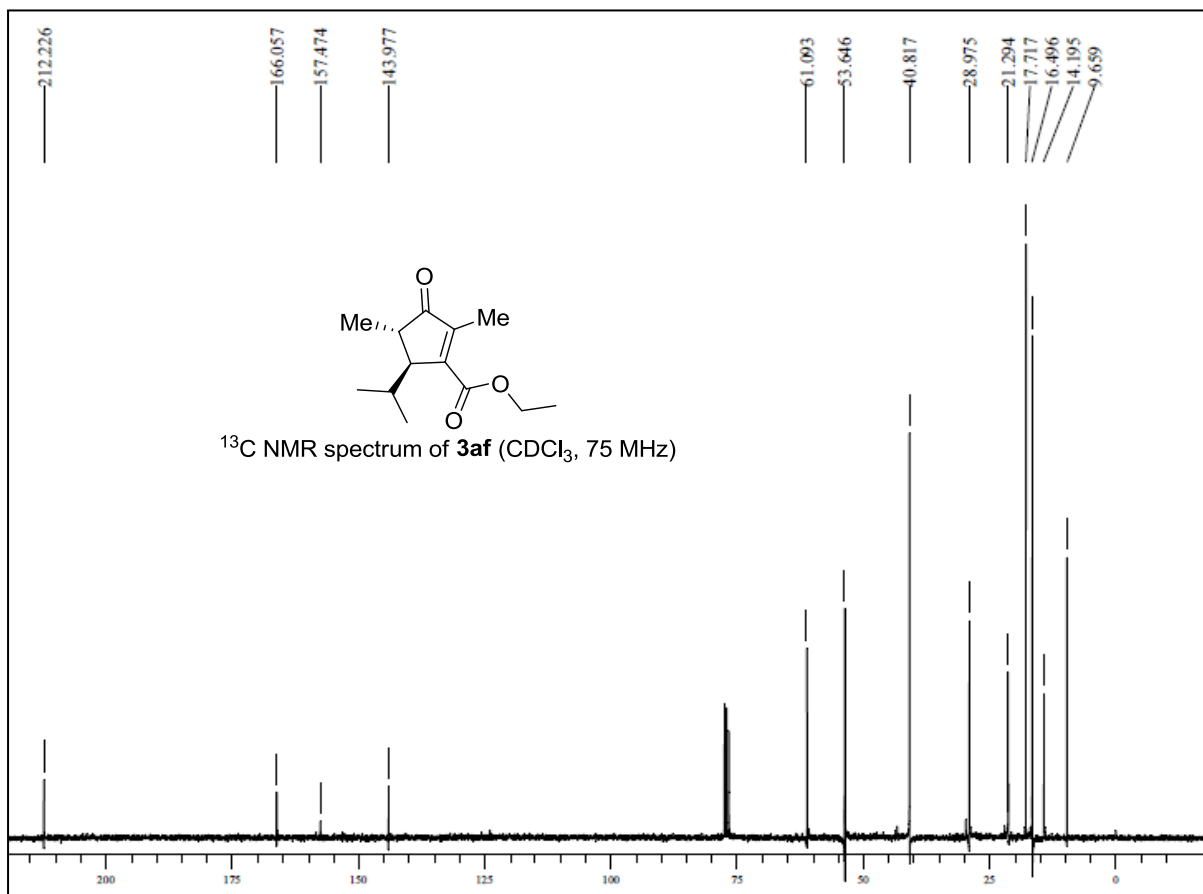



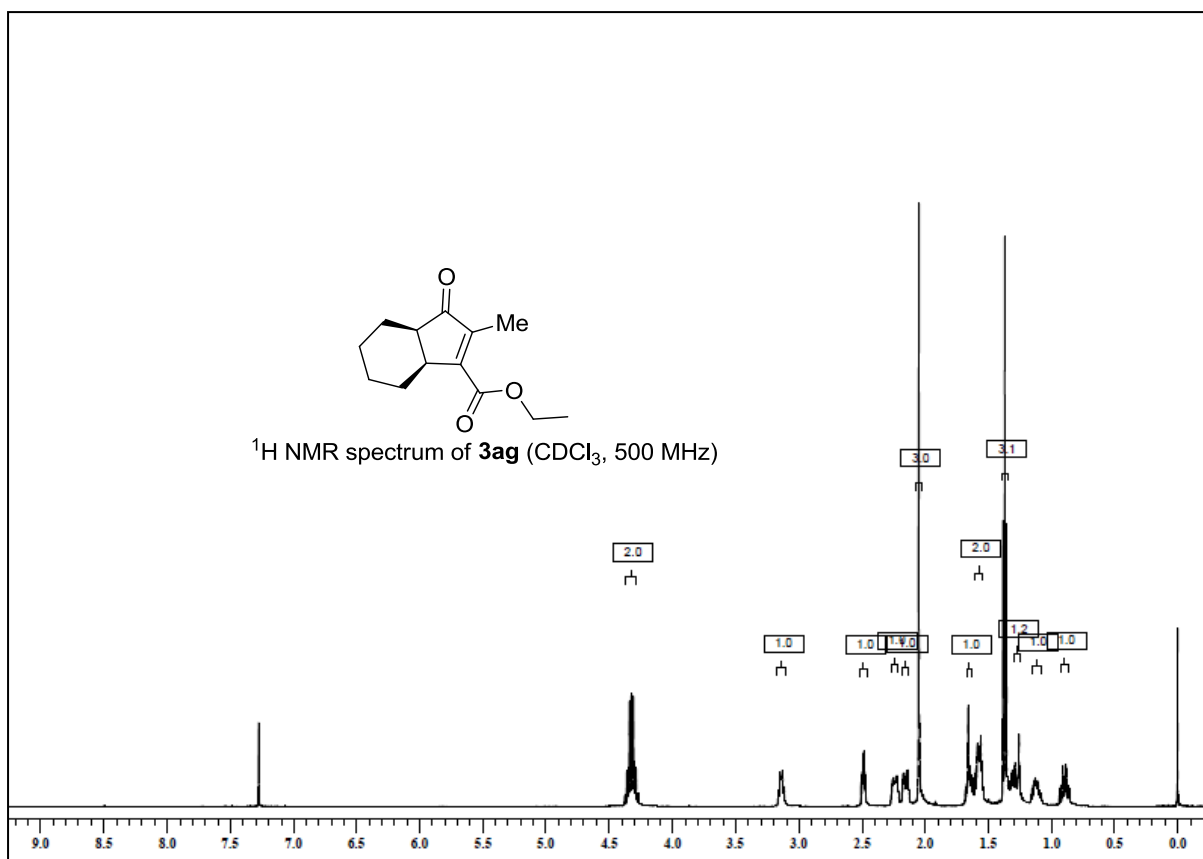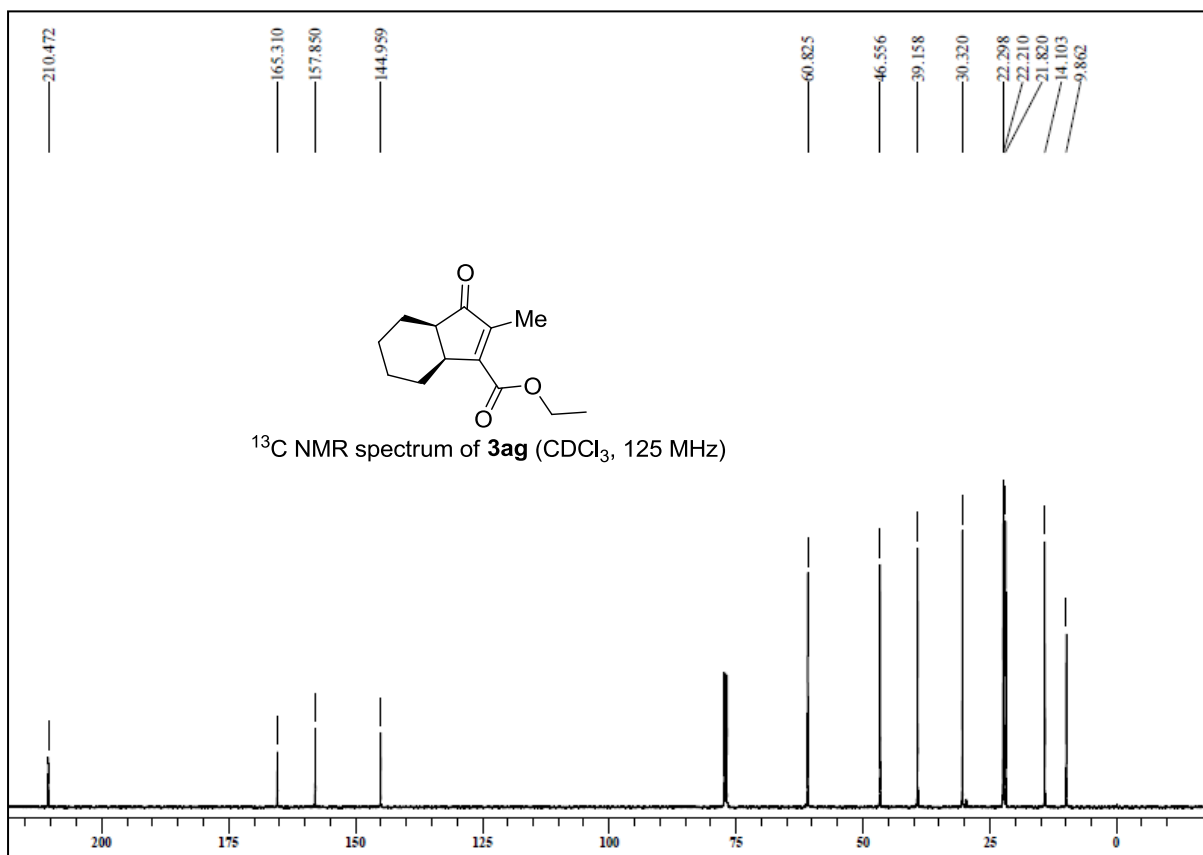

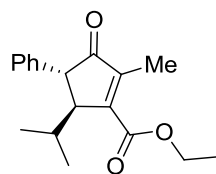

$^1\text{H}$  NMR spectrum of **3ah** ( $\text{CDCl}_3$ , 300 MHz)

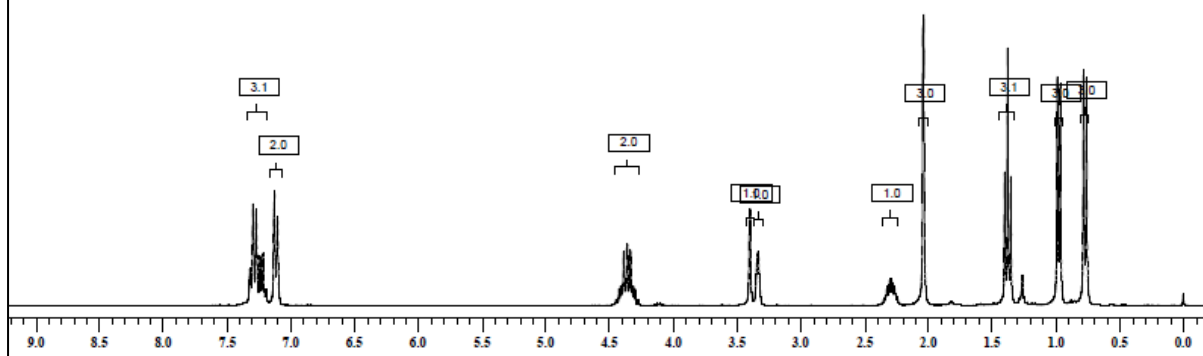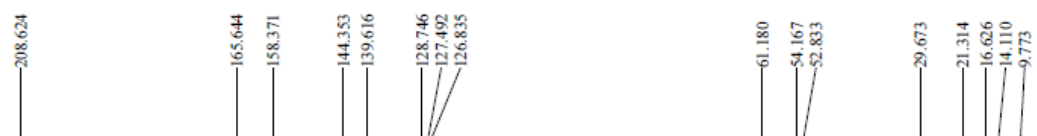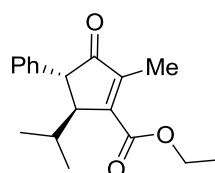

$^{13}\text{C}$  NMR spectrum of **3ah** ( $\text{CDCl}_3$ , 75 MHz)

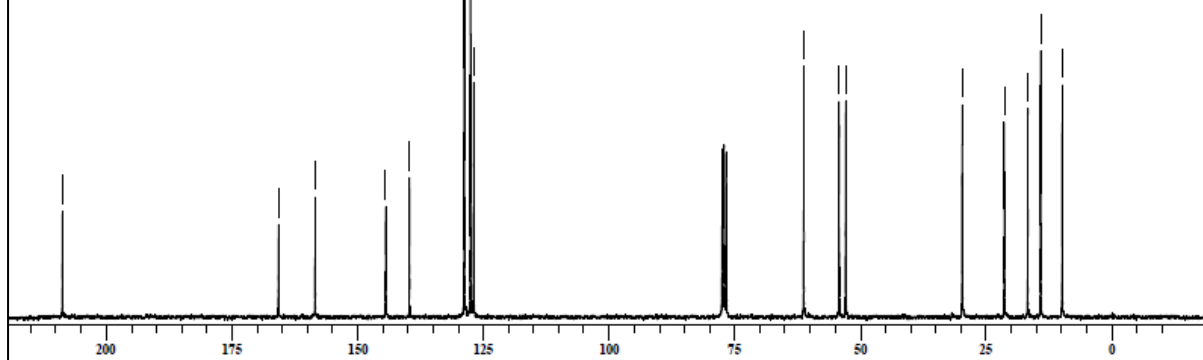

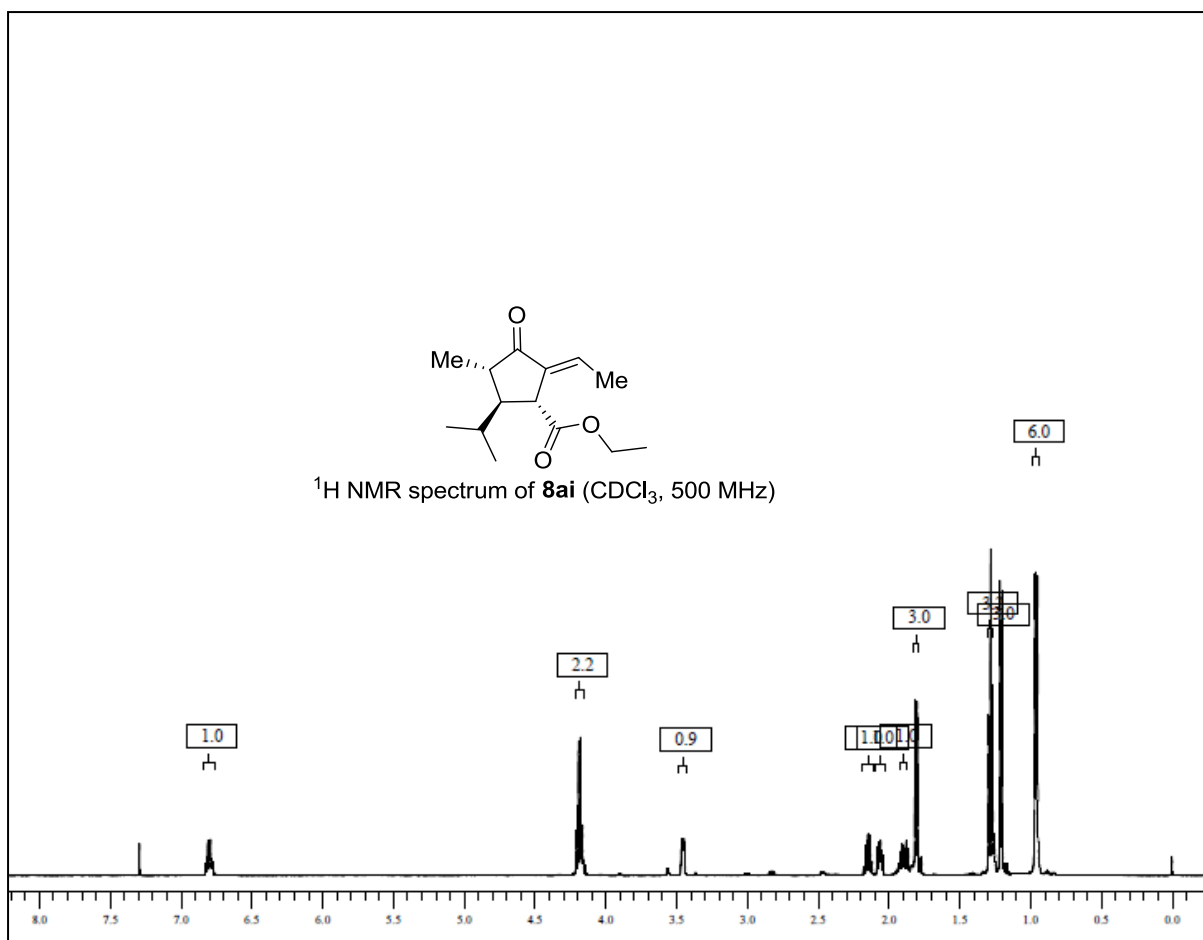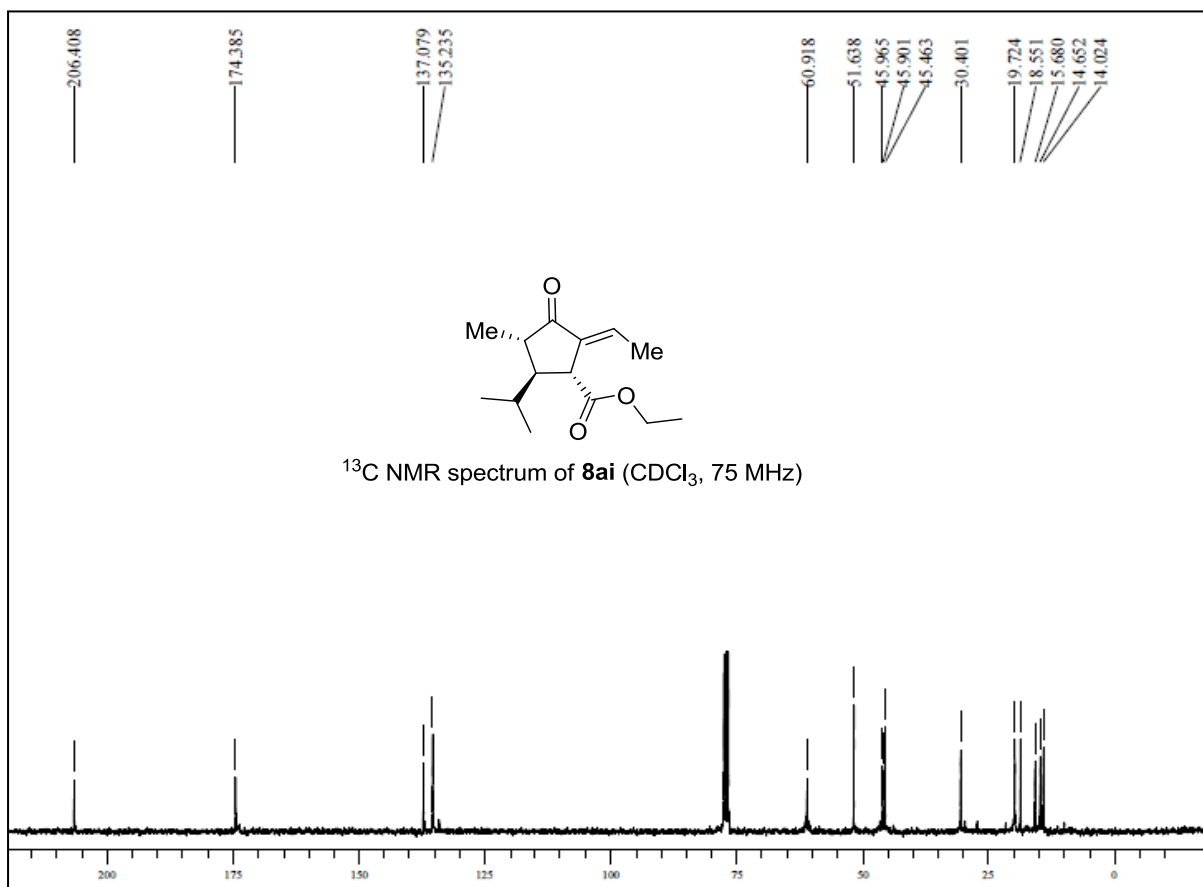

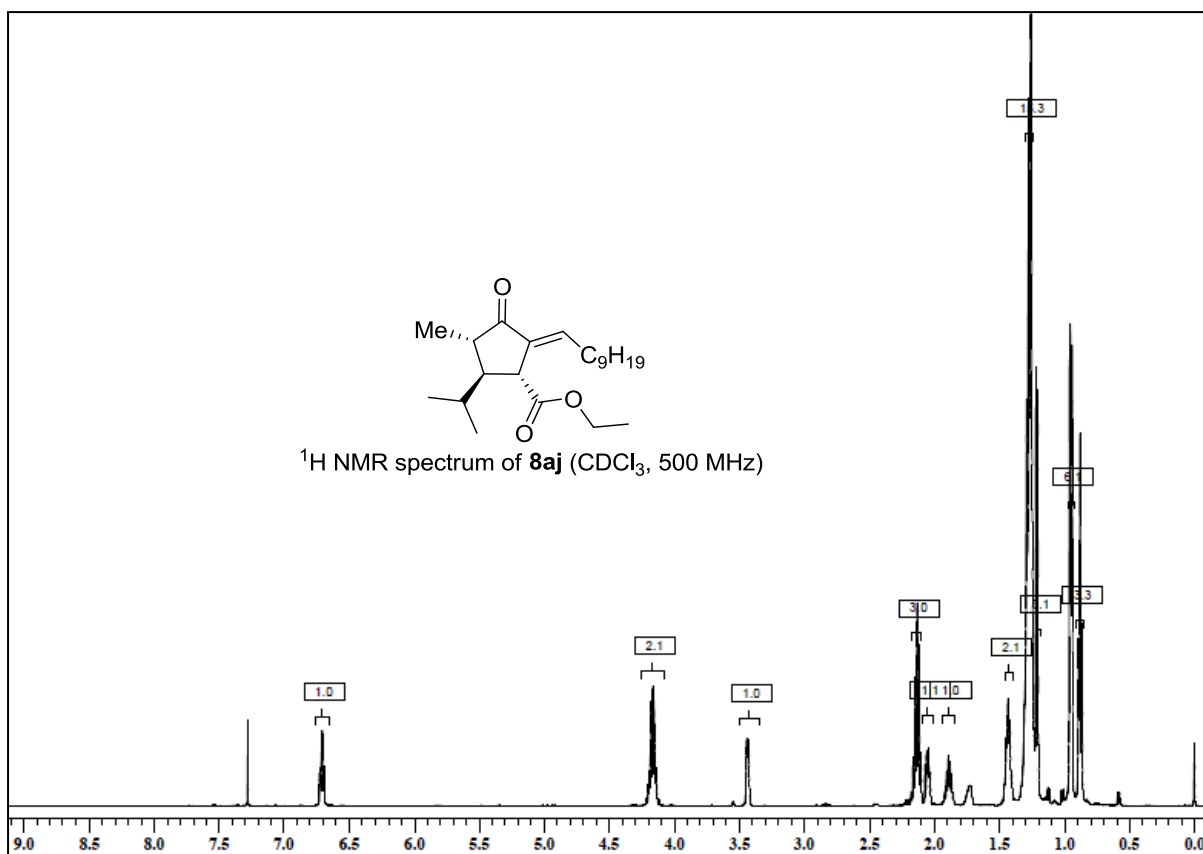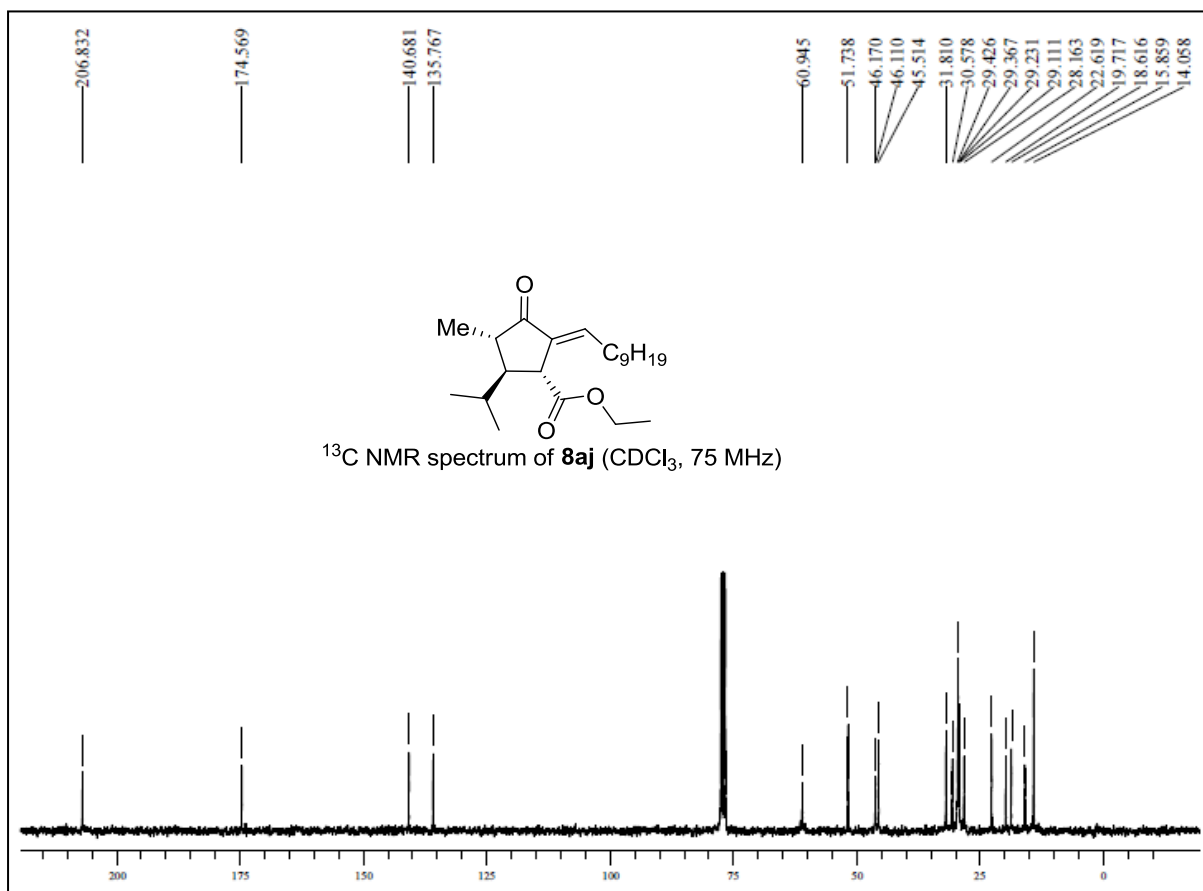

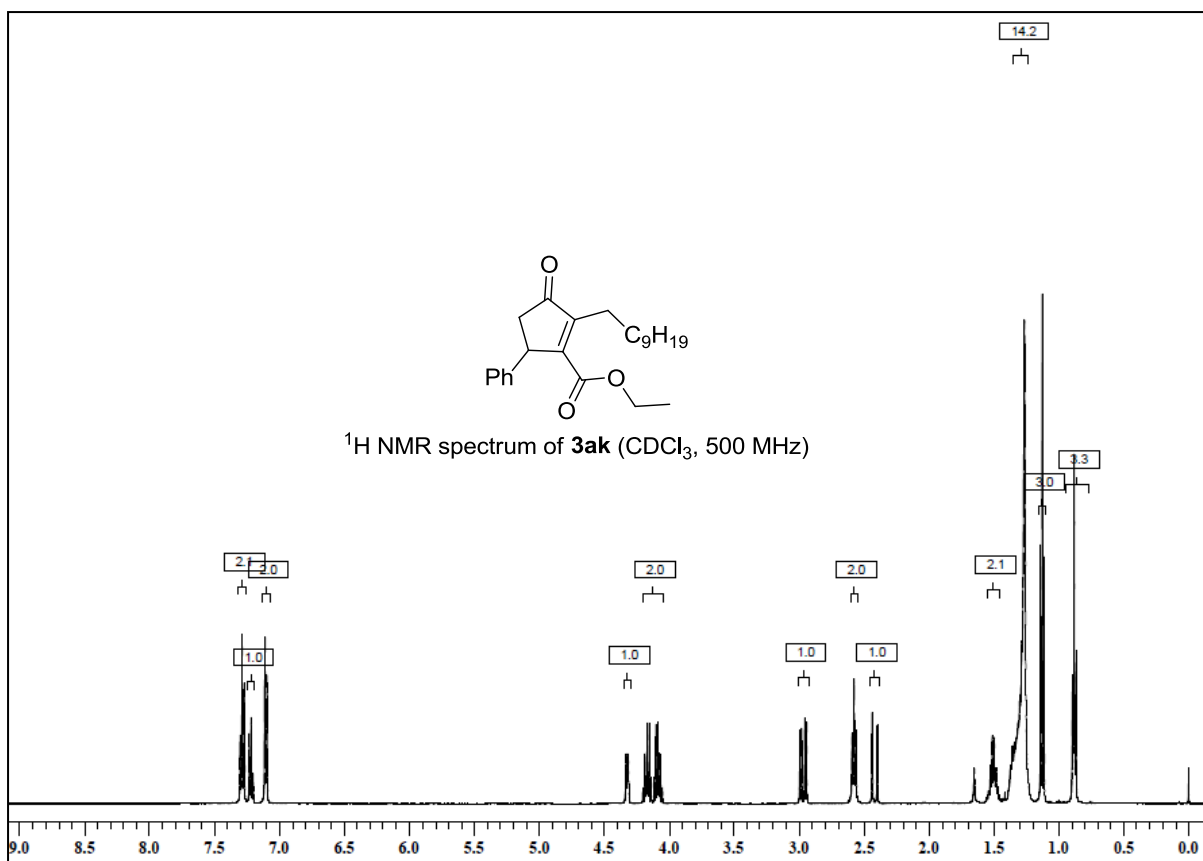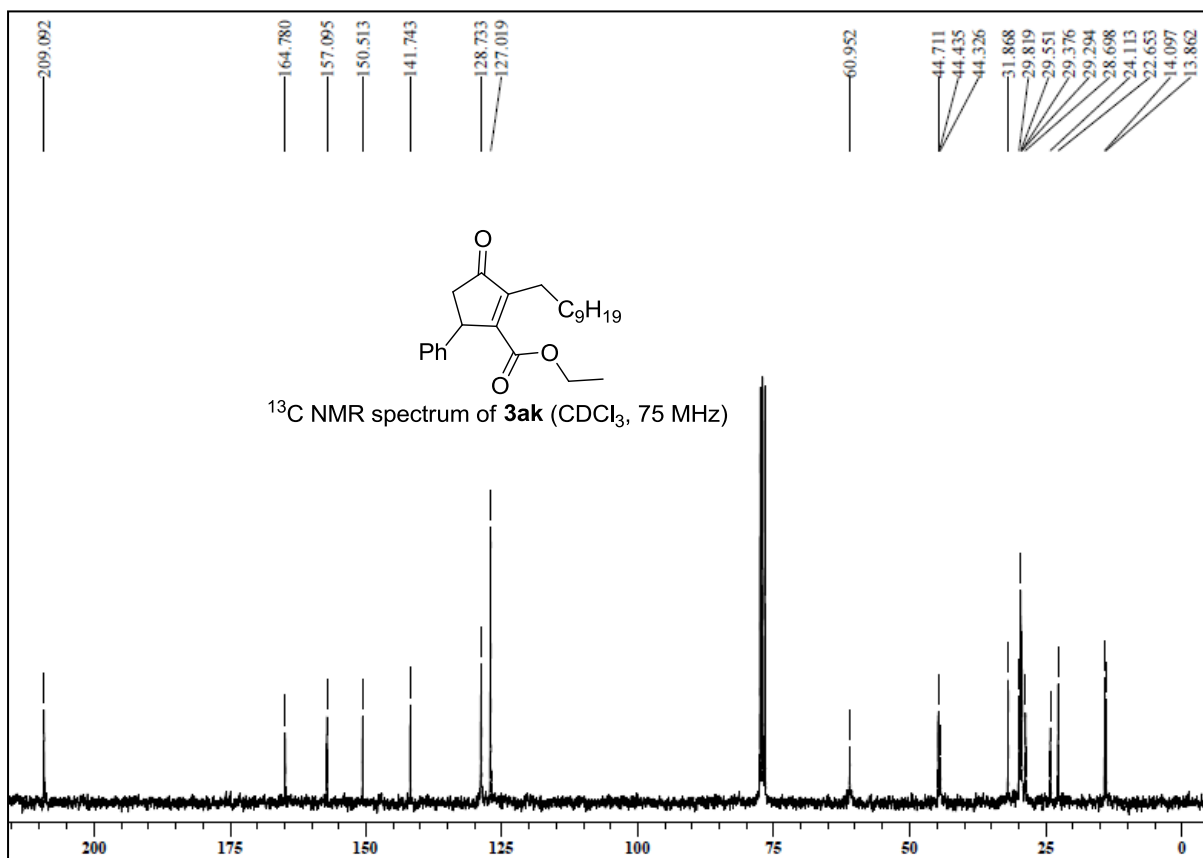

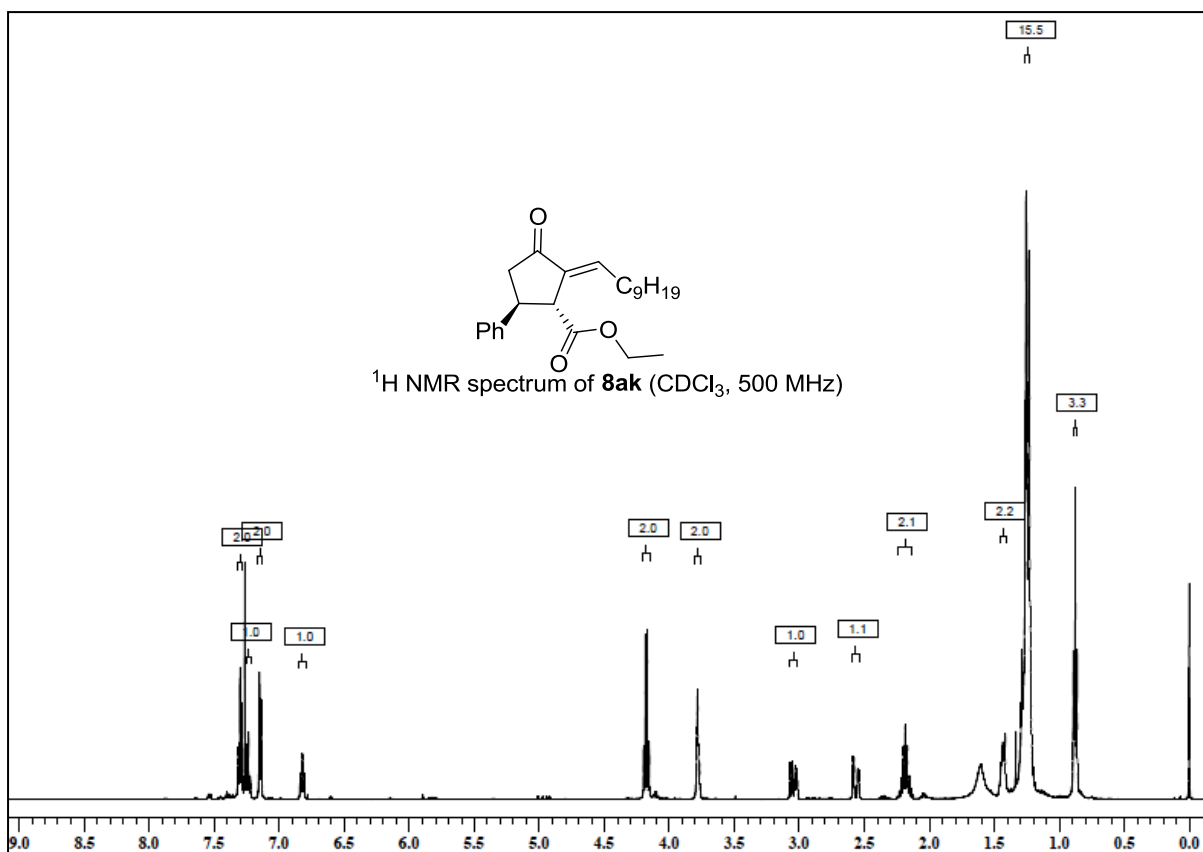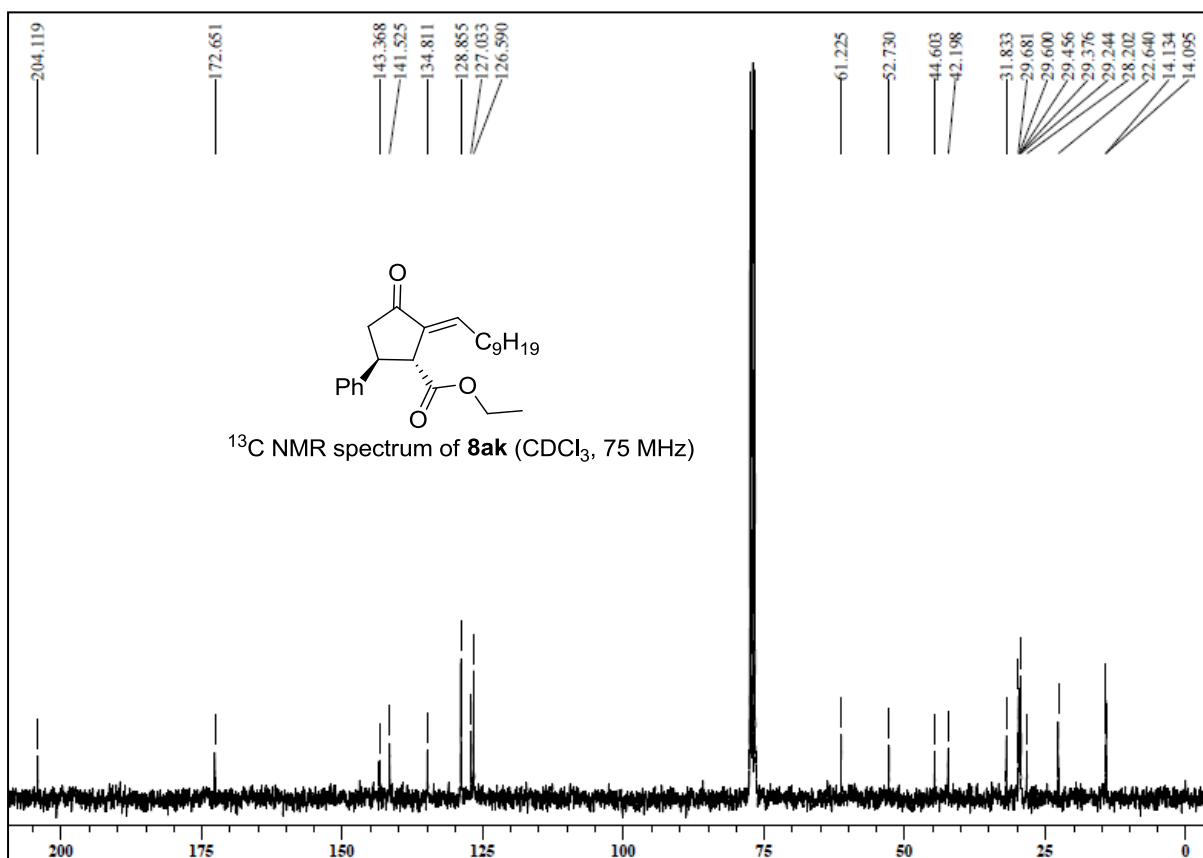

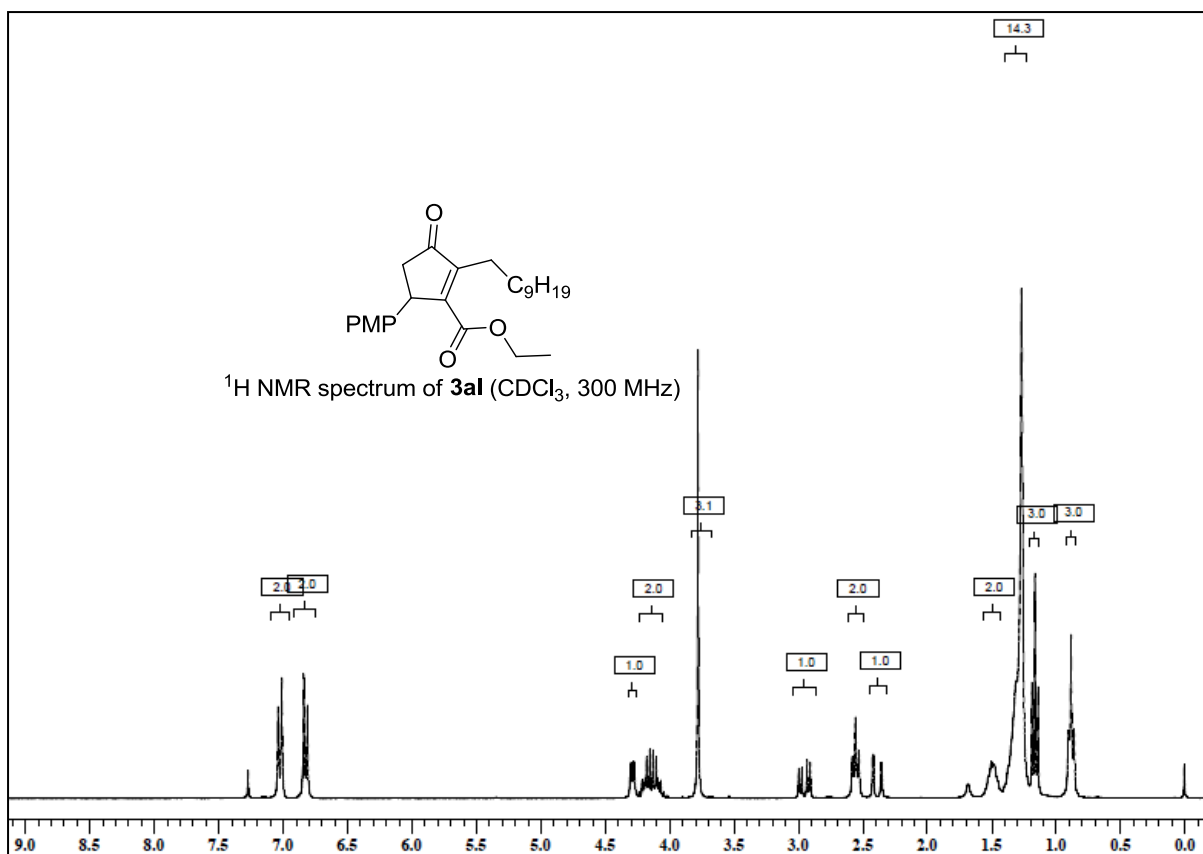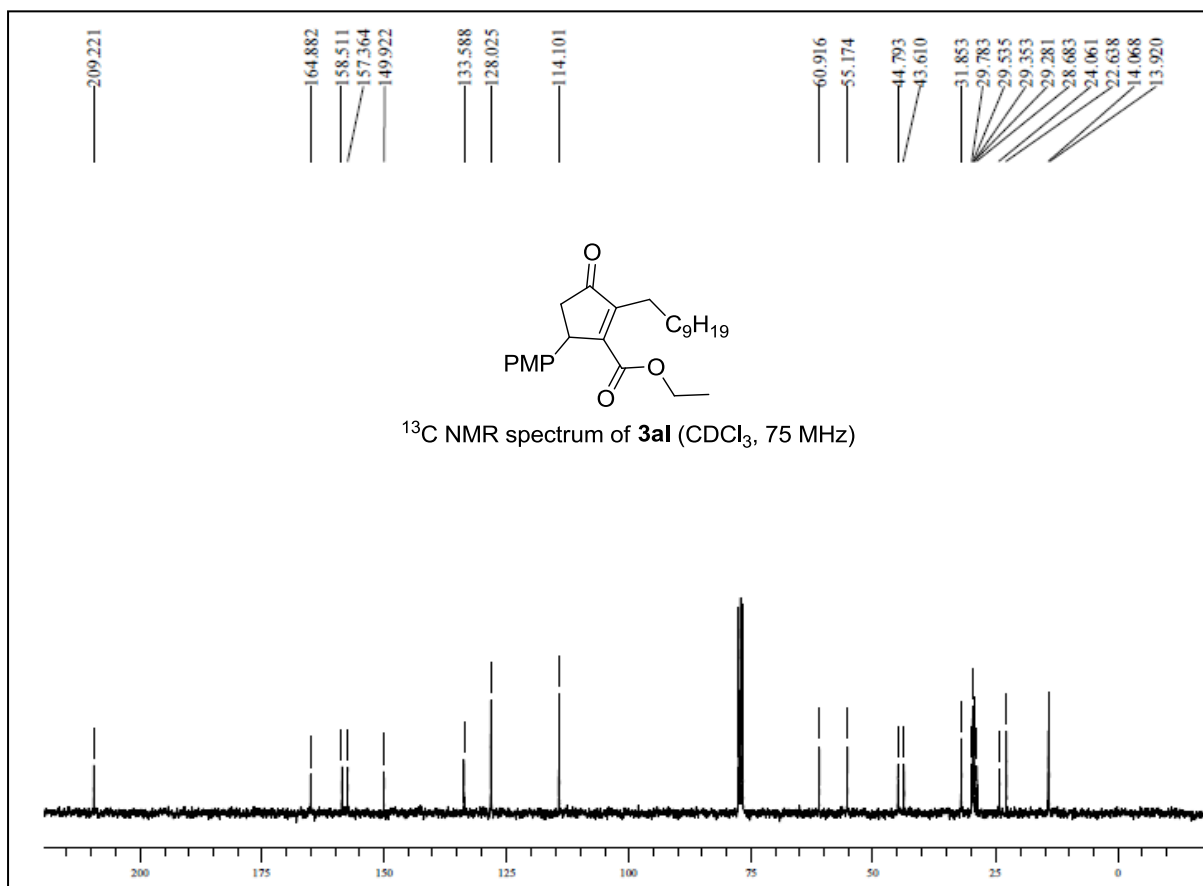

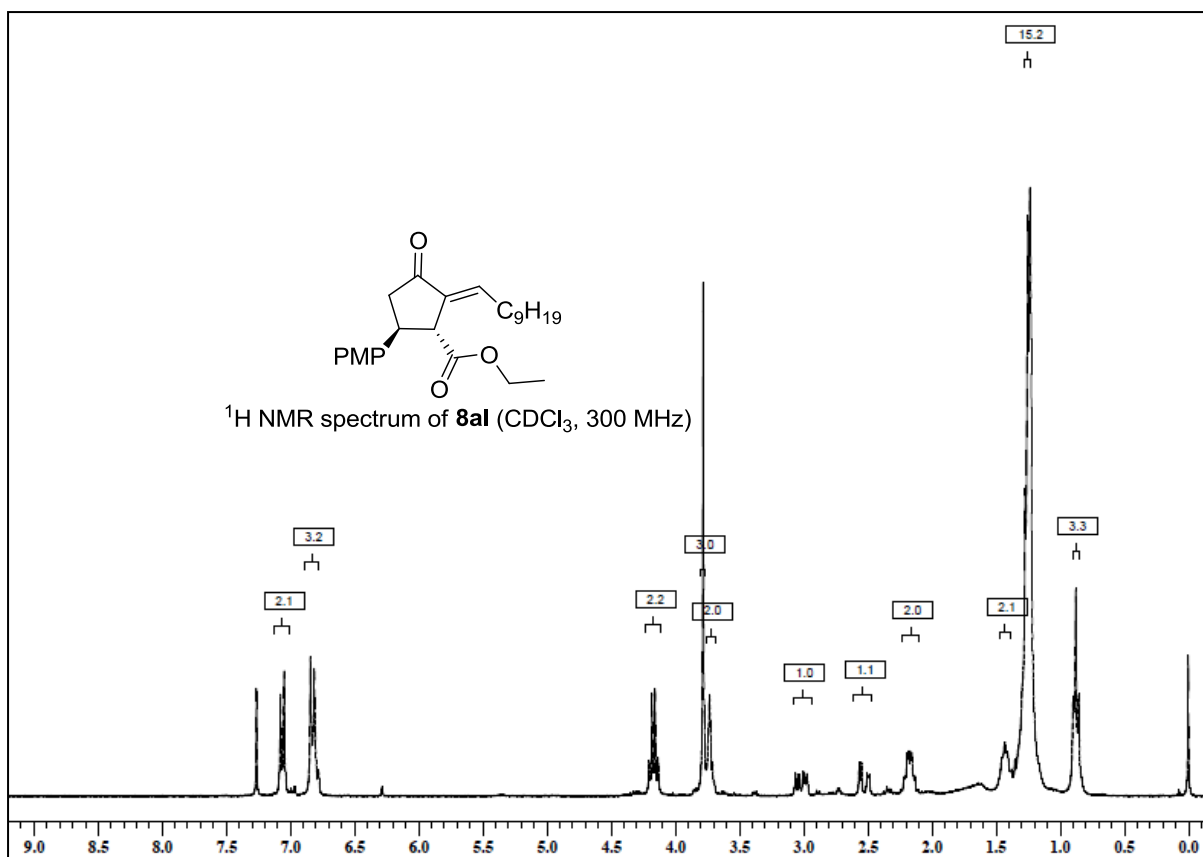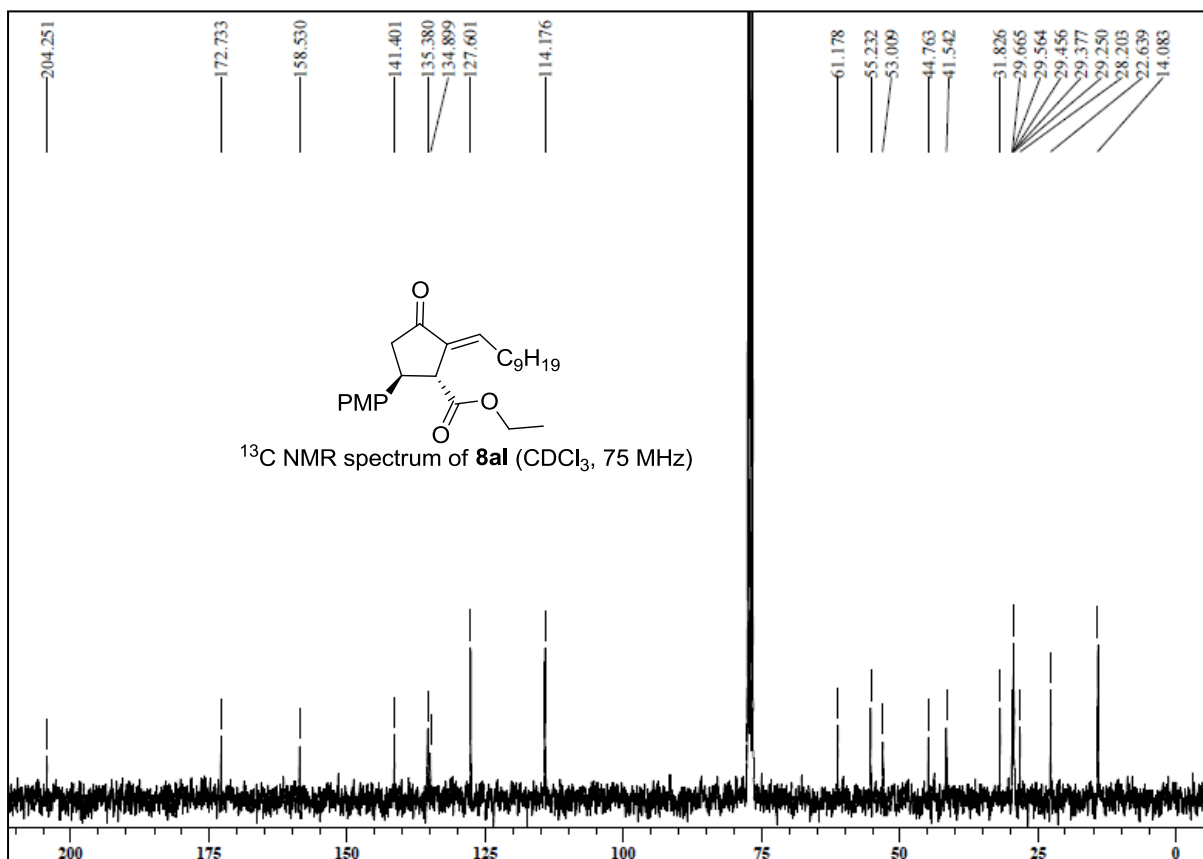

Supplement: c6ob00081a1.pdf [file c6ob00081a1.pdf]
